# Supplementary material for: Mapping Mismanaged Plastic Waste in Indonesia: Subdistrict-level Analysis through Material Flow from Sources to the Environment
Source: Research Square preprint supplement (doi:10.21203/rs.3.rs-8037401/v1), 2025-11-24
Supplement: Supplementary file 1 [file 4f138f1e4a54bf41bbb4a7af.xlsx]

## Sheet: Result and Calculation
Province	City/Regency	Sub-District	Source of Data	Data Year	Description of Data	Data Quality Index	Plastic Waste Gen (ton/day)	Plastic Waste Gen (ton/year)	Percentage of Collected Waste	Percentage of Buried Waste	Percentage of Openly Burned Waste	Percentage of Direct Disposal to River/Drainage	Percentage of Plastic Illegally Disposed on Land	Collected Waste (ton/day)	Buried Waste (ton/day)	Openly Burned Waste (ton/day)	Direct Disposal to River/Drainage (ton/day)	Illegally Disposed on Lan (ton/day)	Collected Waste (ton/year)	Buried Waste (ton/year)	Openly Burned Waste (ton/year)	Direct Disposal to River/Drainage (ton/year)	Illegally Disposed on Lan (ton/year)
ACEH	KAB. ACEH SELATAN	BAKONGAN	SIPSN	2022	Good	4	0.408	148.777	0.0804	0.01	0.7236	0.1436	0.0424	0.0328032	0.00408	0.295229	0.0585888	0.0172992	11.9732	1.4892	107.759	21.3849	6.31421
ACEH	KAB. ACEH SELATAN	SAMADUA	SIPSN	2022	Good	4	1.221	445.627	0.0804	0.01	0.7236	0.1436	0.0424	0.0981684	0.01221	0.883516	0.175336	0.0517704	35.8315	4.45665	322.483	63.9975	18.8962
ACEH	KAB. ACEH SELATAN	KLUET SELATAN	SIPSN	2022	Good	4	1.076	392.804	0.0804	0.01	0.7236	0.1436	0.0424	0.0865104	0.01076	0.778594	0.154514	0.0456224	31.5763	3.9274	284.187	56.3975	16.6522
ACEH	KAB. ACEH SELATAN	PASI RAJA	SIPSN	2022	Good	4	1.352	493.333	0.0804	0.01	0.7236	0.1436	0.0424	0.108701	0.01352	0.978307	0.194147	0.0573248	39.6758	4.9348	357.082	70.8637	20.9236
ACEH	KAB. ACEH SELATAN	LABUHAN HAJI TIMUR	SIPSN	2022	Good	4	0.738	269.396	0.0804	0.01	0.7236	0.1436	0.0424	0.0593352	0.00738	0.534017	0.105977	0.0312912	21.6573	2.6937	194.916	38.6815	11.4213
ACEH	KAB. ACEH SELATAN	KLUET TENGAH	SIPSN	2022	Good	4	0.583	212.918	0.0804	0.01	0.7236	0.1436	0.0424	0.0468732	0.00583	0.421859	0.0837188	0.0247192	17.1087	2.12795	153.978	30.5574	9.02251
ACEH	KAB. ACEH SELATAN	KLUET TIMUR	SIPSN	2022	Good	4	0.79	288.376	0.0804	0.01	0.7236	0.1436	0.0424	0.063516	0.0079	0.571644	0.113444	0.033496	23.1833	2.8835	208.65	41.4071	12.226
ACEH	KAB. ACEH SELATAN	BAKONGAN TIMUR	SIPSN	2022	Good	4	0.475	173.307	0.0804	0.01	0.7236	0.1436	0.0424	0.03819	0.00475	0.34371	0.06821	0.02014	13.9393	1.73375	125.454	24.8966	7.3511
ACEH	KAB. ACEH SELATAN	TRUMON TIMUR	SIPSN	2022	Good	4	0.659	240.588	0.0804	0.01	0.7236	0.1436	0.0424	0.0529836	0.00659	0.476852	0.0946324	0.0279416	19.339	2.40535	174.051	34.5408	10.1987
ACEH	KAB. ACEH SELATAN	LABUHAN HAJI BARAT	SIPSN	2022	Good	4	1.296	472.919	0.0804	0.01	0.7236	0.1436	0.0424	0.104198	0.01296	0.937786	0.186106	0.0549504	38.0324	4.7304	342.292	67.9285	20.0569
ACEH	KAB. ACEH SELATAN	TRUMON	SIPSN	2022	Good	4	0.452	164.859	0.0804	0.01	0.7236	0.1436	0.0424	0.0363408	0.00452	0.327067	0.0649072	0.0191648	13.2644	1.6498	119.38	23.6911	6.99515
ACEH	KAB. ACEH SELATAN	TAPAKTUAN	SIPSN	2022	Good	4	1.655	604.016	0.0804	0.01	0.7236	0.1436	0.0424	0.133062	0.01655	1.19756	0.237658	0.070172	48.5676	6.04075	437.109	86.7452	25.6128
ACEH	KAB. ACEH SELATAN	LABUHANHAJI	SIPSN	2022	Good	4	0.985	359.691	0.0804	0.01	0.7236	0.1436	0.0424	0.079194	0.00985	0.712746	0.141446	0.041764	28.9058	3.59525	260.152	51.6278	15.2439
ACEH	KAB. ACEH SELATAN	MEUKEK	SIPSN	2022	Good	4	1.562	570.28	0.0804	0.01	0.7236	0.1436	0.0424	0.125585	0.01562	1.13026	0.224303	0.0662288	45.8385	5.7013	412.546	81.8707	24.1735
ACEH	KAB. ACEH SELATAN	KLUET UTARA	SIPSN	2022	Good	4	1.874	684.076	0.0804	0.01	0.7236	0.1436	0.0424	0.15067	0.01874	1.35603	0.269106	0.0794576	54.9944	6.8401	494.95	98.2238	29.002
ACEH	KAB. ACEH SELATAN	TRUMON TENGAH	SIPSN	2022	Good	4	0.524	191.339	0.0804	0.01	0.7236	0.1436	0.0424	0.0421296	0.00524	0.379166	0.0752464	0.0222176	15.3773	1.9126	138.396	27.4649	8.10942
ACEH	KAB. ACEH SELATAN	SAWANG	SIPSN	2022	Good	4	1.189	433.931	0.0804	0.01	0.7236	0.1436	0.0424	0.0955956	0.01189	0.86036	0.17074	0.0504136	34.8924	4.33985	314.032	62.3202	18.401
ACEH	KAB. ACEH SELATAN	KOTA BAHAGIA	SIPSN	2022	Good	4	0.544	198.487	0.0804	0.01	0.7236	0.1436	0.0424	0.0437376	0.00544	0.393638	0.0781184	0.0230656	15.9642	1.9856	143.678	28.5132	8.41894
ACEH	KAB. ACEH TENGGARA	SEMADAM	SIPSN	2022	Good	4	0.965	352.152	0.1117	0.0146	0.7968	0.0588	0.0181	0.10779	0.014089	0.768912	0.056742	0.0174665	39.3435	5.14248	280.653	20.7108	6.37527
ACEH	KAB. ACEH TENGGARA	KETAMBE	SIPSN	2022	Good	4	0.878	320.616	0.1117	0.0146	0.7968	0.0588	0.0181	0.0980726	0.0128188	0.69959	0.0516264	0.0158918	35.7965	4.67886	255.35	18.8436	5.80051
ACEH	KAB. ACEH TENGGARA	BADAR	SIPSN	2022	Good	4	1.048	382.611	0.1117	0.0146	0.7968	0.0588	0.0181	0.117062	0.0153008	0.835046	0.0616224	0.0189688	42.7275	5.58479	304.792	22.4922	6.92361
ACEH	KAB. ACEH TENGGARA	BAMBEL	SIPSN	2022	Good	4	1.435	523.866	0.1117	0.0146	0.7968	0.0588	0.0181	0.16029	0.020951	1.14341	0.084378	0.0259735	58.5057	7.64712	417.344	30.798	9.48033
ACEH	KAB. ACEH TENGGARA	BABUSSALAM	SIPSN	2022	Good	4	2.051	748.586	0.1117	0.0146	0.7968	0.0588	0.0181	0.229097	0.0299446	1.63424	0.120599	0.0371231	83.6203	10.9298	596.496	44.0186	13.5499
ACEH	KAB. ACEH TENGGARA	LAWE ALAS	SIPSN	2022	Good	4	1.298	473.75	0.1117	0.0146	0.7968	0.0588	0.0181	0.144987	0.0189508	1.03425	0.0763224	0.0234938	52.9201	6.91704	377.5	27.8577	8.57524
ACEH	KAB. ACEH TENGGARA	DARUL HASANAH	SIPSN	2022	Good	4	1.138	415.329	0.1117	0.0146	0.7968	0.0588	0.0181	0.127115	0.0166148	0.906758	0.0669144	0.0205978	46.3968	6.0644	330.967	24.4238	7.5182
ACEH	KAB. ACEH TENGGARA	BABUL RAHMAH	SIPSN	2022	Good	4	0.733	267.452	0.1117	0.0146	0.7968	0.0588	0.0181	0.0818761	0.0107018	0.584054	0.0431004	0.0132673	29.8848	3.90616	213.18	15.7316	4.84256
ACEH	KAB. ACEH TENGGARA	BABUL MAKMUR	SIPSN	2022	Good	4	1.078	393.517	0.1117	0.0146	0.7968	0.0588	0.0181	0.120413	0.0157388	0.85895	0.0633864	0.0195118	43.9506	5.74466	313.517	23.136	7.12181
ACEH	KAB. ACEH TENGGARA	TANOH ALAS	SIPSN	2022	Good	4	0.375	136.735	0.1117	0.0146	0.7968	0.0588	0.0181	0.0418875	0.005475	0.2988	0.02205	0.0067875	15.2889	1.99838	109.062	8.04825	2.47744
ACEH	KAB. ACEH TENGGARA	LAWE SIGALA-GALA	SIPSN	2022	Good	4	1.51	551.144	0.1117	0.0146	0.7968	0.0588	0.0181	0.168667	0.022046	1.20317	0.088788	0.027331	61.5635	8.04679	439.156	32.4076	9.97582
ACEH	KAB. ACEH TENGGARA	BUKIT TUSAM	SIPSN	2022	Good	4	0.904	330.051	0.1117	0.0146	0.7968	0.0588	0.0181	0.100977	0.0131984	0.720307	0.0531552	0.0163624	36.8565	4.81742	262.912	19.4016	5.97228
ACEH	KAB. ACEH TENGGARA	LAWE BULAN	SIPSN	2022	Good	4	1.188	433.462	0.1117	0.0146	0.7968	0.0588	0.0181	0.1327	0.0173448	0.946598	0.0698544	0.0215028	48.4354	6.33085	345.508	25.4969	7.84852
ACEH	KAB. ACEH TENGGARA	DELENG POKHKISEN	SIPSN	2022	Good	4	0.663	241.96	0.1117	0.0146	0.7968	0.0588	0.0181	0.0740571	0.0096798	0.528278	0.0389844	0.0120003	27.0308	3.53313	192.822	14.2293	4.38011
ACEH	KAB. ACEH TENGGARA	LEUSER	SIPSN	2022	Good	4	0.522	190.635	0.1117	0.0146	0.7968	0.0588	0.0181	0.0583074	0.0076212	0.41593	0.0306936	0.0094482	21.2822	2.78174	151.814	11.2032	3.44859
ACEH	KAB. ACEH TENGGARA	LAWE SUMUR	SIPSN	2022	Good	4	0.643	234.575	0.1117	0.0146	0.7968	0.0588	0.0181	0.0718231	0.0093878	0.512342	0.0378084	0.0116383	26.2154	3.42655	187.005	13.8001	4.24798
ACEH	KAB. ACEH TIMUR	IDI RAYEUK	SIPSN	2022	Good	4	2.947	1075.62	0.0329	0.0101	0.9289	0.0111	0.017	0.0969563	0.0297647	2.73747	0.0327117	0.050099	35.389	10.8641	999.176	11.9398	18.2861
ACEH	KAB. ACEH TIMUR	RANTO PEUREULAK	SIPSN	2022	Good	4	1.973	720.115	0.0329	0.0101	0.9289	0.0111	0.017	0.0649117	0.0199273	1.83272	0.0219003	0.033541	23.6928	7.27346	668.943	7.99361	12.2425
ACEH	KAB. ACEH TIMUR	NURUSSALAM	SIPSN	2022	Good	4	1.333	486.434	0.0329	0.0101	0.9289	0.0111	0.017	0.0438557	0.0134633	1.23822	0.0147963	0.022661	16.0073	4.9141	451.952	5.40065	8.27126
ACEH	KAB. ACEH TIMUR	JULOK	SIPSN	2022	Good	4	2.001	730.483	0.0329	0.0101	0.9289	0.0111	0.017	0.0658329	0.0202101	1.85873	0.0222111	0.034017	24.029	7.37669	678.436	8.10705	12.4162
ACEH	KAB. ACEH TIMUR	DARUL IHSAN	SIPSN	2022	Good	4	0.565	206.297	0.0329	0.0101	0.9289	0.0111	0.017	0.0185885	0.0057065	0.524829	0.0062715	0.009605	6.7848	2.08287	191.562	2.2891	3.50582
ACEH	KAB. ACEH TIMUR	MADAT	SIPSN	2022	Good	4	2.024	738.819	0.0329	0.0101	0.9289	0.0111	0.017	0.0665896	0.0204424	1.88009	0.0224664	0.034408	24.3052	7.46148	686.234	8.20024	12.5589
ACEH	KAB. ACEH TIMUR	PEUDAWA	SIPSN	2022	Good	4	0.979	357.406	0.0329	0.0101	0.9289	0.0111	0.017	0.0322091	0.0098879	0.909393	0.0108669	0.016643	11.7563	3.60908	331.928	3.96642	6.0747
ACEH	KAB. ACEH TIMUR	SIMPANG JERNIH	SIPSN	2022	Good	4	0.276	100.669	0.0329	0.0101	0.9289	0.0111	0.017	0.0090804	0.0027876	0.256376	0.0030636	0.004692	3.31435	1.01747	93.5774	1.11821	1.71258
ACEH	KAB. ACEH TIMUR	IDI TIMUR	SIPSN	2022	Good	4	0.534	194.769	0.0329	0.0101	0.9289	0.0111	0.017	0.0175686	0.0053934	0.496033	0.0059274	0.009078	6.41254	1.96859	181.052	2.1635	3.31347
ACEH	KAB. ACEH TIMUR	SUNGAI RAYA	SIPSN	2022	Good	4	0.96	350.442	0.0329	0.0101	0.9289	0.0111	0.017	0.031584	0.009696	0.891744	0.010656	0.01632	11.5282	3.53904	325.487	3.88944	5.9568
ACEH	KAB. ACEH TIMUR	INDRA MAKMU	SIPSN	2022	Good	4	1.197	436.76	0.0329	0.0101	0.9289	0.0111	0.017	0.0393813	0.0120897	1.11189	0.0132867	0.020349	14.3742	4.41274	405.841	4.84965	7.42739
ACEH	KAB. ACEH TIMUR	PANTE BIDARI	SIPSN	2022	Good	4	1.933	705.658	0.0329	0.0101	0.9289	0.0111	0.017	0.0635957	0.0195233	1.79556	0.0214563	0.032861	23.2124	7.126	655.381	7.83155	11.9943
ACEH	KAB. ACEH TIMUR	SIMPANG ULIM	SIPSN	2022	Good	4	1.595	582.328	0.0329	0.0101	0.9289	0.0111	0.017	0.0524755	0.0161095	1.4816	0.0177045	0.027115	19.1536	5.87997	540.782	6.46214	9.89697
ACEH	KAB. ACEH TIMUR	RANTAU SELAMAT	SIPSN	2022	Good	4	0.945	344.928	0.0329	0.0101	0.9289	0.0111	0.017	0.0310905	0.0095445	0.877811	0.0104895	0.016065	11.348	3.48374	320.401	3.82867	5.86372
ACEH	KAB. ACEH TIMUR	DARUL AMAN	SIPSN	2022	Good	4	1.605	585.652	0.0329	0.0101	0.9289	0.0111	0.017	0.0528045	0.0162105	1.49088	0.0178155	0.027285	19.2736	5.91683	544.173	6.50266	9.95903
ACEH	KAB. ACEH TIMUR	IDI TUNONG	SIPSN	2022	Good	4	0.875	319.524	0.0329	0.0101	0.9289	0.0111	0.017	0.0287875	0.0088375	0.812787	0.0097125	0.014875	10.5074	3.22569	296.667	3.54506	5.42938
ACEH	KAB. ACEH TIMUR	PEUREULAK BARAT	SIPSN	2022	Good	4	1.322	482.583	0.0329	0.0101	0.9289	0.0111	0.017	0.0434938	0.0133522	1.22801	0.0146742	0.022474	15.8752	4.87355	448.222	5.35608	8.20301
ACEH	KAB. ACEH TIMUR	PEUREULAK TIMUR	SIPSN	2022	Good	4	1.083	395.342	0.0329	0.0101	0.9289	0.0111	0.017	0.0356307	0.0109383	1.006	0.0120213	0.018411	13.0052	3.99248	367.19	4.38777	6.72002
ACEH	KAB. ACEH TIMUR	PEUNARON	SIPSN	2022	Good	4	0.666	243.151	0.0329	0.0101	0.9289	0.0111	0.017	0.0219114	0.0067266	0.618647	0.0073926	0.011322	7.99766	2.45521	225.806	2.6983	4.13253
ACEH	KAB. ACEH TIMUR	DARUL FALAH	SIPSN	2022	Good	4	0.288	105.048	0.0329	0.0101	0.9289	0.0111	0.017	0.0094752	0.0029088	0.267523	0.0031968	0.004896	3.45845	1.06171	97.646	1.16683	1.78704
ACEH	KAB. ACEH TIMUR	SERBAJADI	SIPSN	2022	Good	4	0.529	193.028	0.0329	0.0101	0.9289	0.0111	0.017	0.0174041	0.0053429	0.491388	0.0058719	0.008993	6.3525	1.95016	179.357	2.14324	3.28245
ACEH	KAB. ACEH TIMUR	BIREM BAYEUN	SIPSN	2022	Good	4	2.131	777.968	0.0329	0.0101	0.9289	0.0111	0.017	0.0701099	0.0215231	1.97949	0.0236541	0.036227	25.5901	7.85593	722.512	8.63375	13.2229
ACEH	KAB. ACEH TIMUR	PEUREULAK	SIPSN	2022	Good	4	3.496	1276.17	0.0329	0.0101	0.9289	0.0111	0.017	0.115018	0.0353096	3.24743	0.0388056	0.059432	41.9817	12.888	1185.31	14.164	21.6927
ACEH	KAB. ACEH TIMUR	BANDA ALAM	SIPSN	2022	Good	4	0.668	243.679	0.0329	0.0101	0.9289	0.0111	0.017	0.0219772	0.0067468	0.620505	0.0074148	0.011356	8.02168	2.46258	226.484	2.7064	4.14494
ACEH	KAB. ACEH TENGAH	ATU LINTANG	SIPSN	2020	Bad	2	0.665	242.791	0.269	0.0578	0.5029	0.1447	0.0256	0.178885	0.038437	0.334429	0.0962255	0.017024	65.293	14.0295	122.066	35.1223	6.21376
ACEH	KAB. ACEH TENGAH	RUSIP ANTARA	SIPSN	2020	Bad	2	0.808	294.997	0.269	0.0578	0.5029	0.1447	0.0256	0.217352	0.0467024	0.406343	0.116918	0.0206848	79.3335	17.0464	148.315	42.6749	7.54995
ACEH	KAB. ACEH TENGAH	SILIH NARA	SIPSN	2020	Bad	2	2.277	831.186	0.269	0.0578	0.5029	0.1447	0.0256	0.612513	0.131611	1.1451	0.329482	0.0582912	223.567	48.0379	417.963	120.261	21.2763
ACEH	KAB. ACEH TENGAH	JAGONG JEGET	SIPSN	2020	Bad	2	0.957	349.422	0.269	0.0578	0.5029	0.1447	0.0256	0.257433	0.0553146	0.481275	0.138478	0.0244992	93.963	20.1898	175.665	50.5444	8.94221
ACEH	KAB. ACEH TENGAH	PEGASING	SIPSN	2020	Bad	2	2.128	776.598	0.269	0.0578	0.5029	0.1447	0.0256	0.572432	0.122998	1.07017	0.307922	0.0544768	208.938	44.8944	390.612	112.391	19.884
ACEH	KAB. ACEH TENGAH	KUTE PANANG	SIPSN	2020	Bad	2	0.782	285.469	0.269	0.0578	0.5029	0.1447	0.0256	0.210358	0.0451996	0.393268	0.113155	0.0200192	76.7807	16.4979	143.543	41.3017	7.30701
ACEH	KAB. ACEH TENGAH	KEBAYAKAN	SIPSN	2020	Bad	2	1.702	621.155	0.269	0.0578	0.5029	0.1447	0.0256	0.457838	0.0983756	0.855936	0.246279	0.0435712	167.111	35.9071	312.417	89.892	15.9035
ACEH	KAB. ACEH TENGAH	CELALA	SIPSN	2020	Bad	2	0.952	347.529	0.269	0.0578	0.5029	0.1447	0.0256	0.256088	0.0550256	0.478761	0.137754	0.0243712	93.4721	20.0843	174.748	50.2804	8.89549
ACEH	KAB. ACEH TENGAH	BINTANG	SIPSN	2020	Bad	2	0.999	364.562	0.269	0.0578	0.5029	0.1447	0.0256	0.268731	0.0577422	0.502397	0.144555	0.0255744	98.0868	21.0759	183.375	52.7627	9.33466
ACEH	KAB. ACEH TENGAH	LAUT TAWAR	SIPSN	2020	Bad	2	1.76	642.559	0.269	0.0578	0.5029	0.1447	0.0256	0.47344	0.101728	0.885104	0.254672	0.045056	172.806	37.1307	323.063	92.9553	16.4454
ACEH	KAB. ACEH TENGAH	LINGE	SIPSN	2020	Bad	2	1.032	376.765	0.269	0.0578	0.5029	0.1447	0.0256	0.277608	0.0596496	0.518993	0.14933	0.0264192	101.327	21.7721	189.432	54.5056	9.64301
ACEH	KAB. ACEH TENGAH	KETOL	SIPSN	2020	Bad	2	1.385	505.649	0.269	0.0578	0.5029	0.1447	0.0256	0.372565	0.080053	0.696516	0.200409	0.035456	135.986	29.2193	254.229	73.1495	12.9414
ACEH	KAB. ACEH TENGAH	BEBESEN	SIPSN	2020	Bad	2	3.684	1344.67	0.269	0.0578	0.5029	0.1447	0.0256	0.990996	0.212935	1.85268	0.533075	0.0943104	361.714	77.7213	676.23	194.572	34.4233
ACEH	KAB. ACEH TENGAH	BIES	SIPSN	2020	Bad	2	0.763	278.454	0.269	0.0578	0.5029	0.1447	0.0256	0.205247	0.0441014	0.383713	0.110406	0.0195328	74.9152	16.097	140.055	40.2982	7.12947
ACEH	KAB. ACEH BARAT	KAWAY XVI	SIPSN	2022	Good	4	2.016	735.915	0.1966	0.0051	0.7241	0.0394	0.0348	0.396346	0.0102816	1.45979	0.0794304	0.0701568	144.666	3.75278	532.822	28.9921	25.6072
ACEH	KAB. ACEH BARAT	WOYLA	SIPSN	2022	Good	4	1.297	473.444	0.1966	0.0051	0.7241	0.0394	0.0348	0.25499	0.0066147	0.939158	0.0511018	0.0451356	93.0714	2.41437	342.793	18.6522	16.4745
ACEH	KAB. ACEH BARAT	SUNGAI MAS	SIPSN	2022	Good	4	0.412	150.449	0.1966	0.0051	0.7241	0.0394	0.0348	0.0809992	0.0021012	0.298329	0.0162328	0.0143376	29.5647	0.766938	108.89	5.92497	5.23322
ACEH	KAB. ACEH BARAT	MEUREUBO	SIPSN	2022	Good	4	2.864	1045.19	0.1966	0.0051	0.7241	0.0394	0.0348	0.563062	0.0146064	2.07382	0.112842	0.0996672	205.518	5.33134	756.945	41.1872	36.3785
ACEH	KAB. ACEH BARAT	WOYLA BARAT	SIPSN	2022	Good	4	0.74	270.088	0.1966	0.0051	0.7241	0.0394	0.0348	0.145484	0.003774	0.535834	0.029156	0.025752	53.1017	1.37751	195.579	10.6419	9.39948
ACEH	KAB. ACEH BARAT	PANTE CEUREUMEN	SIPSN	2022	Good	4	1.083	395.388	0.1966	0.0051	0.7241	0.0394	0.0348	0.212918	0.0055233	0.7842	0.0426702	0.0376884	77.715	2.016	286.233	15.5746	13.7563
ACEH	KAB. ACEH BARAT	KAWAY XVI	SIPSN	2022	Good	4	2.016	735.915	0.1966	0.0051	0.7241	0.0394	0.0348	0.396346	0.0102816	1.45979	0.0794304	0.0701568	144.666	3.75278	532.822	28.9921	25.6072
ACEH	KAB. ACEH BARAT	JOHAN PAHLAWAN	SIPSN	2022	Good	4	6.006	2192.14	0.1966	0.0051	0.7241	0.0394	0.0348	1.18078	0.0306306	4.34894	0.236636	0.209009	430.985	11.1802	1587.36	86.3723	76.2882
ACEH	KAB. ACEH BARAT	BUBON	SIPSN	2022	Good	4	0.642	234.269	0.1966	0.0051	0.7241	0.0394	0.0348	0.126217	0.0032742	0.464872	0.0252948	0.0223416	46.0693	1.19508	169.678	9.2326	8.15468
ACEH	KAB. ACEH BARAT	SAMATIGA	SIPSN	2022	Good	4	1.5	547.45	0.1966	0.0051	0.7241	0.0394	0.0348	0.2949	0.00765	1.08615	0.0591	0.0522	107.638	2.79225	396.445	21.5715	19.053
ACEH	KAB. ACEH BARAT	WOYLA TIMUR	SIPSN	2022	Good	4	0.492	179.647	0.1966	0.0051	0.7241	0.0394	0.0348	0.0967272	0.0025092	0.356257	0.0193848	0.0171216	35.3054	0.915858	130.034	7.07545	6.24938
ACEH	KAB. ACEH BARAT	PANTON REU	SIPSN	2022	Good	4	0.628	229.397	0.1966	0.0051	0.7241	0.0394	0.0348	0.123465	0.0032028	0.454735	0.0247432	0.0218544	45.0647	1.16902	165.978	9.03127	7.97686
ACEH	KAB. ACEH BARAT	ARONGAN LAMBALEK	SIPSN	2022	Good	4	1.131	412.852	0.1966	0.0051	0.7241	0.0394	0.0348	0.222355	0.0057681	0.818957	0.0445614	0.0393588	81.1594	2.10536	298.919	16.2649	14.366
ACEH	KAB. ACEH BESAR	KUTA COT GLIE	Average of Province	Filling Data	Worst	1	1.369	499.646	0.1825	0.0065	0.7637	0.0179	0.0294	0.249843	0.0088985	1.04551	0.0245051	0.0402486	91.1925	3.24795	381.609	8.94436	14.6907
ACEH	KAB. ACEH BESAR	KOTA JANTHO	Average of Province	Filling Data	Worst	1	0.865	315.836	0.1825	0.0065	0.7637	0.0179	0.0294	0.157863	0.0056225	0.660601	0.0154835	0.025431	57.6198	2.05221	241.119	5.65148	9.28231
ACEH	KAB. ACEH BESAR	SUKAMAKMUR	Average of Province	Filling Data	Worst	1	1.508	550.297	0.1825	0.0065	0.7637	0.0179	0.0294	0.27521	0.009802	1.15166	0.0269932	0.0443352	100.452	3.57773	420.356	9.85252	16.1823
ACEH	KAB. ACEH BESAR	KRUENG BARONA JAYA	Average of Province	Filling Data	Worst	1	1.644	599.981	0.1825	0.0065	0.7637	0.0179	0.0294	0.30003	0.010686	1.25552	0.0294276	0.0483336	109.511	3.90039	458.266	10.7411	17.6418
ACEH	KAB. ACEH BESAR	SIMPANG TIGA	Average of Province	Filling Data	Worst	1	0.634	231.295	0.1825	0.0065	0.7637	0.0179	0.0294	0.115705	0.004121	0.484186	0.0113486	0.0186396	42.2323	1.50417	176.728	4.14224	6.80345
ACEH	KAB. ACEH BESAR	BLANG BINTANG	Average of Province	Filling Data	Worst	1	1.129	412.239	0.1825	0.0065	0.7637	0.0179	0.0294	0.206043	0.0073385	0.862217	0.0202091	0.0331926	75.2055	2.67855	314.709	7.37632	12.1153
ACEH	KAB. ACEH BESAR	INDRAPURI	Average of Province	Filling Data	Worst	1	2.172	792.688	0.1825	0.0065	0.7637	0.0179	0.0294	0.39639	0.014118	1.65876	0.0388788	0.0638568	144.682	5.15307	605.446	14.1908	23.3077
ACEH	KAB. ACEH BESAR	DARUL KAMAL	Average of Province	Filling Data	Worst	1	0.814	297.275	0.1825	0.0065	0.7637	0.0179	0.0294	0.148555	0.005291	0.621652	0.0145706	0.0239316	54.2226	1.93121	226.903	5.31827	8.73503
ACEH	KAB. ACEH BESAR	KUTA MALAKA	Average of Province	Filling Data	Worst	1	0.651	237.493	0.1825	0.0065	0.7637	0.0179	0.0294	0.118808	0.0042315	0.497169	0.0116529	0.0191394	43.3647	1.5445	181.467	4.25331	6.98588
ACEH	KAB. ACEH BESAR	DARUL IMARAH	Average of Province	Filling Data	Worst	1	5.273	1924.61	0.1825	0.0065	0.7637	0.0179	0.0294	0.962323	0.0342745	4.02699	0.0943867	0.155026	351.248	12.5102	1469.85	34.4511	56.5846
ACEH	KAB. ACEH BESAR	KUTA BARO	Average of Province	Filling Data	Worst	1	2.563	935.611	0.1825	0.0065	0.7637	0.0179	0.0294	0.467748	0.0166595	1.95736	0.0458777	0.0753522	170.728	6.08072	714.438	16.7454	27.5036
ACEH	KAB. ACEH BESAR	MONTASIK	Average of Province	Filling Data	Worst	1	1.933	705.582	0.1825	0.0065	0.7637	0.0179	0.0294	0.352773	0.0125645	1.47623	0.0346007	0.0568302	128.762	4.58604	538.825	12.6293	20.743
ACEH	KAB. ACEH BESAR	BAITUSSALAM	Average of Province	Filling Data	Worst	1	2.257	823.912	0.1825	0.0065	0.7637	0.0179	0.0294	0.411903	0.0146705	1.72367	0.0404003	0.0663558	150.344	5.35473	629.14	14.7461	24.2199
ACEH	KAB. ACEH BESAR	PULO ACEH	Average of Province	Filling Data	Worst	1	0.44	160.65	0.1825	0.0065	0.7637	0.0179	0.0294	0.0803	0.00286	0.336028	0.007876	0.012936	29.3095	1.0439	122.65	2.87474	4.72164
ACEH	KAB. ACEH BESAR	MESJID RAYA	Average of Province	Filling Data	Worst	1	2.025	739.038	0.1825	0.0065	0.7637	0.0179	0.0294	0.369563	0.0131625	1.54649	0.0362475	0.059535	134.89	4.80431	564.47	13.2303	21.7303
ACEH	KAB. ACEH BESAR	PEUKAN WorstA	Average of Province	Filling Data	Worst	1	2.165	790.389	0.1825	0.0065	0.7637	0.0179	0.0294	0.395113	0.0140725	1.65341	0.0387535	0.063651	144.216	5.13646	603.495	14.145	23.2326
ACEH	KAB. ACEH BESAR	DARUSSALAM	Average of Province	Filling Data	Worst	1	2.166	790.689	0.1825	0.0065	0.7637	0.0179	0.0294	0.395295	0.014079	1.65417	0.0387714	0.0636804	144.283	5.13884	603.774	14.1516	23.2433
ACEH	KAB. ACEH BESAR	LEUPUNG	Average of Province	Filling Data	Worst	1	0.336	122.562	0.1825	0.0065	0.7637	0.0179	0.0294	0.06132	0.002184	0.256603	0.0060144	0.0098784	22.3818	0.79716	93.6602	2.19526	3.60562
ACEH	KAB. ACEH BESAR	SEULIMEUM	Average of Province	Filling Data	Worst	1	2.22	810.25	0.1825	0.0065	0.7637	0.0179	0.0294	0.40515	0.01443	1.69541	0.039738	0.065268	147.88	5.26695	618.826	14.5044	23.8228
ACEH	KAB. ACEH BESAR	LHOONG	Average of Province	Filling Data	Worst	1	0.948	346.16	0.1825	0.0065	0.7637	0.0179	0.0294	0.17301	0.006162	0.723988	0.0169692	0.0278712	63.1487	2.24913	264.255	6.19376	10.173
ACEH	KAB. ACEH BESAR	INGIN JAYA	Average of Province	Filling Data	Worst	1	3.249	1185.87	0.1825	0.0065	0.7637	0.0179	0.0294	0.592943	0.0211185	2.48126	0.0581571	0.0955206	216.424	7.70825	905.66	21.2273	34.865
ACEH	KAB. ACEH BESAR	LEMBAH SEULAWAH	Average of Province	Filling Data	Worst	1	1.194	435.832	0.1825	0.0065	0.7637	0.0179	0.0294	0.217905	0.007761	0.911858	0.0213726	0.0351036	79.5353	2.83277	332.828	7.801	12.8128
ACEH	KAB. ACEH BESAR	LHOKNGA	Average of Province	Filling Data	Worst	1	1.623	592.45	0.1825	0.0065	0.7637	0.0179	0.0294	0.296198	0.0105495	1.23949	0.0290517	0.0477162	108.112	3.85057	452.412	10.6039	17.4164
ACEH	KAB. PIDIE	BATEE	SIPSN	2022	Good	4	1.877	685.018	0.0572	0.0123	0.7751	0.1218	0.0336	0.107364	0.0230871	1.45486	0.228619	0.0630672	39.188	8.42679	531.025	83.4458	23.0195
ACEH	KAB. PIDIE	DELIMA	SIPSN	2022	Good	4	1.97	719.106	0.0572	0.0123	0.7751	0.1218	0.0336	0.112684	0.024231	1.52695	0.239946	0.066192	41.1297	8.84431	557.336	87.5803	24.1601
ACEH	KAB. PIDIE	GEUMPANG	SIPSN	2022	Good	4	0.648	236.678	0.0572	0.0123	0.7751	0.1218	0.0336	0.0370656	0.0079704	0.502265	0.0789264	0.0217728	13.5289	2.9092	183.327	28.8081	7.94707
ACEH	KAB. PIDIE	INDRAJAYA	SIPSN	2022	Good	4	2.139	780.872	0.0572	0.0123	0.7751	0.1218	0.0336	0.122351	0.0263097	1.65794	0.26053	0.0718704	44.658	9.60304	605.148	95.0935	26.2327
ACEH	KAB. PIDIE	MILA	SIPSN	2022	Good	4	0.9	328.555	0.0572	0.0123	0.7751	0.1218	0.0336	0.05148	0.01107	0.69759	0.10962	0.03024	18.7902	4.04055	254.62	40.0113	11.0376
ACEH	KAB. PIDIE	MUARA TIGA	SIPSN	2022	Good	4	1.829	667.563	0.0572	0.0123	0.7751	0.1218	0.0336	0.104619	0.0224967	1.41766	0.222772	0.0614544	38.1859	8.2113	517.445	81.3119	22.4309
ACEH	KAB. PIDIE	PADANG TIJI	SIPSN	2022	Good	4	2.209	806.282	0.0572	0.0123	0.7751	0.1218	0.0336	0.126355	0.0271707	1.7122	0.269056	0.0742224	46.1195	9.91731	624.952	98.2055	27.0912
ACEH	KAB. PIDIE	PIDIE	SIPSN	2022	Good	4	4.112	1500.93	0.0572	0.0123	0.7751	0.1218	0.0336	0.235206	0.0505776	3.18721	0.500842	0.138163	85.8503	18.4608	1163.33	182.807	50.4296
ACEH	KAB. PIDIE	SAKTI	SIPSN	2022	Good	4	1.976	721.407	0.0572	0.0123	0.7751	0.1218	0.0336	0.113027	0.0243048	1.5316	0.240677	0.0663936	41.2549	8.87125	559.033	87.847	24.2337
ACEH	KAB. PIDIE	SIMPANG TIGA	SIPSN	2022	Good	4	2.129	777.19	0.0572	0.0123	0.7751	0.1218	0.0336	0.121779	0.0261867	1.65019	0.259312	0.0715344	44.4493	9.55815	602.319	94.649	26.1101
ACEH	KAB. PIDIE	TIRO/TRUSEB	SIPSN	2022	Good	4	0.788	287.728	0.0572	0.0123	0.7751	0.1218	0.0336	0.0450736	0.0096924	0.610779	0.0959784	0.0264768	16.4519	3.53773	222.934	35.0321	9.66403
ACEH	KAB. PIDIE	KEUMALA	SIPSN	2022	Good	4	0.964	351.696	0.0572	0.0123	0.7751	0.1218	0.0336	0.0551408	0.0118572	0.747196	0.117415	0.0323904	20.1264	4.32788	272.727	42.8565	11.8225
ACEH	KAB. PIDIE	MUTIARA TIMUR	SIPSN	2022	Good	4	3.207	1170.54	0.0572	0.0123	0.7751	0.1218	0.0336	0.18344	0.0394461	2.48575	0.390613	0.107755	66.9557	14.3978	907.297	142.574	39.3306
ACEH	KAB. PIDIE	GRONG-GRONG	SIPSN	2022	Good	4	0.627	228.788	0.0572	0.0123	0.7751	0.1218	0.0336	0.0358644	0.0077121	0.485988	0.0763686	0.0210672	13.0905	2.81492	177.386	27.8745	7.68953
ACEH	KAB. PIDIE	GRONG-GRONG	SIPSN	2022	Good	4	0.627	228.788	0.0572	0.0123	0.7751	0.1218	0.0336	0.0358644	0.0077121	0.485988	0.0763686	0.0210672	13.0905	2.81492	177.386	27.8745	7.68953
ACEH	KAB. PIDIE	MANE	SIPSN	2022	Good	4	0.782	285.394	0.0572	0.0123	0.7751	0.1218	0.0336	0.0447304	0.0096186	0.606128	0.0952476	0.0262752	16.3266	3.51079	221.237	34.7654	9.59045
ACEH	KAB. PIDIE	GLUMPANG BARO	SIPSN	2022	Good	4	1.022	372.965	0.0572	0.0123	0.7751	0.1218	0.0336	0.0584584	0.0125706	0.792152	0.12448	0.0343392	21.3373	4.58827	289.136	45.4351	12.5338
ACEH	KAB. PIDIE	MUTIARA	SIPSN	2022	Good	4	1.89	689.685	0.0572	0.0123	0.7751	0.1218	0.0336	0.108108	0.023247	1.46494	0.230202	0.063504	39.4594	8.48516	534.703	84.0237	23.179
ACEH	KAB. PIDIE	TANGSE	SIPSN	2022	Good	4	2.437	889.645	0.0572	0.0123	0.7751	0.1218	0.0336	0.139396	0.0299751	1.88892	0.296827	0.0818832	50.8797	10.9409	689.455	108.342	29.8874
ACEH	KAB. PIDIE	KEMBANG TANJONG	SIPSN	2022	Good	4	1.976	721.407	0.0572	0.0123	0.7751	0.1218	0.0336	0.113027	0.0243048	1.5316	0.240677	0.0663936	41.2549	8.87125	559.033	87.847	24.2337
ACEH	KAB. PIDIE	KOTA SIGLI	SIPSN	2022	Good	4	1.791	653.822	0.0572	0.0123	0.7751	0.1218	0.0336	0.102445	0.0220293	1.3882	0.218144	0.0601776	37.3925	8.04069	506.694	79.6225	21.9648
ACEH	KAB. PIDIE	PEUKAN BARO	SIPSN	2022	Good	4	1.88	686.3	0.0572	0.0123	0.7751	0.1218	0.0336	0.107536	0.023124	1.45719	0.228984	0.063168	39.2506	8.44026	531.874	83.5792	23.0563
ACEH	KAB. PIDIE	GLUMPANG TIGA	SIPSN	2022	Good	4	1.743	636.137	0.0572	0.0123	0.7751	0.1218	0.0336	0.0996996	0.0214389	1.351	0.212297	0.0585648	36.3904	7.8252	493.115	77.4886	21.3762
ACEH	KAB. PIDIE	TITEUE	SIPSN	2022	Good	4	0.665	242.858	0.0572	0.0123	0.7751	0.1218	0.0336	0.038038	0.0081795	0.515441	0.080997	0.022344	13.8839	2.98552	188.136	29.5639	8.15556
ACEH	KAB. ACEH UTARA	BAKTIYA	Average of Province	Filling Data	Worst	1	3.567	1301.96	0.0364	0.0138	0.8895	0.0119	0.0484	0.129839	0.0492246	3.17285	0.0424473	0.172643	47.3912	17.967	1158.09	15.4933	63.0146
ACEH	KAB. ACEH UTARA	MATANGKULI	Average of Province	Filling Data	Worst	1	1.774	647.5	0.0364	0.0138	0.8895	0.0119	0.0484	0.0645736	0.0244812	1.57797	0.0211106	0.0858616	23.5694	8.93564	575.96	7.70537	31.3395
ACEH	KAB. ACEH UTARA	MEURAH MULIA	Average of Province	Filling Data	Worst	1	2.025	739.038	0.0364	0.0138	0.8895	0.0119	0.0484	0.07371	0.027945	1.80124	0.0240975	0.09801	26.9042	10.1999	657.452	8.79559	35.7736
ACEH	KAB. ACEH UTARA	SYAMTALIRA ARON	Average of Province	Filling Data	Worst	1	1.799	656.764	0.0364	0.0138	0.8895	0.0119	0.0484	0.0654836	0.0248262	1.60021	0.0214081	0.0870716	23.9015	9.06156	584.077	7.81396	31.7811
ACEH	KAB. ACEH UTARA	SYAMTALIRA BAYU	Average of Province	Filling Data	Worst	1	2.083	760.232	0.0364	0.0138	0.8895	0.0119	0.0484	0.0758212	0.0287454	1.85283	0.0247877	0.100817	27.6747	10.4921	676.282	9.04751	36.7983
ACEH	KAB. ACEH UTARA	TANAH PASIR	Average of Province	Filling Data	Worst	1	0.922	336.496	0.0364	0.0138	0.8895	0.0119	0.0484	0.0335608	0.0127236	0.820119	0.0109718	0.0446248	12.2497	4.64411	299.343	4.00471	16.2881
ACEH	KAB. ACEH UTARA	TANAH LUAS	Average of Province	Filling Data	Worst	1	2.385	870.498	0.0364	0.0138	0.8895	0.0119	0.0484	0.086814	0.032913	2.12146	0.0283815	0.115434	31.6871	12.0132	774.332	10.3592	42.1334
ACEH	KAB. ACEH UTARA	BAKTIYA BARAT	Average of Province	Filling Data	Worst	1	1.791	653.598	0.0364	0.0138	0.8895	0.0119	0.0484	0.0651924	0.0247158	1.59309	0.0213129	0.0866844	23.7952	9.02127	581.479	7.77921	31.6398
ACEH	KAB. ACEH UTARA	NIBONG	Average of Province	Filling Data	Worst	1	1.022	372.918	0.0364	0.0138	0.8895	0.0119	0.0484	0.0372008	0.0141036	0.909069	0.0121618	0.0494648	13.5783	5.14781	331.81	4.43906	18.0547
ACEH	KAB. ACEH UTARA	LAPANG	Average of Province	Filling Data	Worst	1	0.803	293.209	0.0364	0.0138	0.8895	0.0119	0.0484	0.0292292	0.0110814	0.714268	0.0095557	0.0388652	10.6687	4.04471	260.708	3.48783	14.1858
ACEH	KAB. ACEH UTARA	PIRAK TIMUR	Average of Province	Filling Data	Worst	1	0.817	298.075	0.0364	0.0138	0.8895	0.0119	0.0484	0.0297388	0.0112746	0.726721	0.0097223	0.0395428	10.8547	4.11523	265.253	3.54864	14.4331
ACEH	KAB. ACEH UTARA	BANDA BARO	Average of Province	Filling Data	Worst	1	0.758	276.781	0.0364	0.0138	0.8895	0.0119	0.0484	0.0275912	0.0104604	0.674241	0.0090202	0.0366872	10.0708	3.81805	246.098	3.29237	13.3908
ACEH	KAB. ACEH UTARA	NISAM ANTARA	Average of Province	Filling Data	Worst	1	1.265	461.591	0.0364	0.0138	0.8895	0.0119	0.0484	0.046046	0.017457	1.12522	0.0150535	0.061226	16.8068	6.3718	410.704	5.49453	22.3475
ACEH	KAB. ACEH UTARA	GEUREDONG PASE	Average of Province	Filling Data	Worst	1	0.534	195.073	0.0364	0.0138	0.8895	0.0119	0.0484	0.0194376	0.0073692	0.474993	0.0063546	0.0258456	7.09472	2.68976	173.372	2.31943	9.43364
ACEH	KAB. ACEH UTARA	PAYA BAKONG	Average of Province	Filling Data	Worst	1	1.442	526.404	0.0364	0.0138	0.8895	0.0119	0.0484	0.0524888	0.0198996	1.28266	0.0171598	0.0697928	19.1584	7.26335	468.171	6.26333	25.4744
ACEH	KAB. ACEH UTARA	SAWANG	Average of Province	Filling Data	Worst	1	3.643	1329.82	0.0364	0.0138	0.8895	0.0119	0.0484	0.132605	0.0502734	3.24045	0.0433517	0.176321	48.4009	18.3498	1182.76	15.8234	64.3572
ACEH	KAB. ACEH UTARA	LHOKSUKON	Average of Province	Filling Data	Worst	1	4.654	1698.71	0.0364	0.0138	0.8895	0.0119	0.0484	0.169406	0.0642252	4.13973	0.0553826	0.225254	61.833	23.4422	1511	20.2146	82.2176
ACEH	KAB. ACEH UTARA	SAMUDERA	Average of Province	Filling Data	Worst	1	2.574	939.476	0.0364	0.0138	0.8895	0.0119	0.0484	0.0936936	0.0355212	2.28957	0.0306306	0.124582	34.1982	12.9652	835.694	11.1802	45.4723
ACEH	KAB. ACEH UTARA	DEWANTARA	Average of Province	Filling Data	Worst	1	4.252	1551.82	0.0364	0.0138	0.8895	0.0119	0.0484	0.154773	0.0586776	3.78215	0.0505988	0.205797	56.4921	21.4173	1380.49	18.4686	75.1158
ACEH	KAB. ACEH UTARA	COT GIREK	Average of Province	Filling Data	Worst	1	1.854	676.724	0.0364	0.0138	0.8895	0.0119	0.0484	0.0674856	0.0255852	1.64913	0.0220626	0.0897336	24.6322	9.3386	601.934	8.05285	32.7528
ACEH	KAB. ACEH UTARA	T. JAMBO AYE	Average of Province	Filling Data	Worst	1	4.072	1486.14	0.0364	0.0138	0.8895	0.0119	0.0484	0.148221	0.0561936	3.62204	0.0484568	0.197085	54.1006	20.5107	1322.05	17.6867	71.936
ACEH	KAB. ACEH UTARA	SIMPANG KRAMAT	Average of Province	Filling Data	Worst	1	0.993	362.421	0.0364	0.0138	0.8895	0.0119	0.0484	0.0361452	0.0137034	0.883273	0.0118167	0.0480612	13.193	5.00174	322.395	4.3131	17.5423
ACEH	KAB. ACEH UTARA	SEUNUDDON	Average of Province	Filling Data	Worst	1	2.393	873.264	0.0364	0.0138	0.8895	0.0119	0.0484	0.0871052	0.0330234	2.12857	0.0284767	0.115821	31.7934	12.0535	776.929	10.394	42.2747
ACEH	KAB. ACEH UTARA	LANGKAHAN	Average of Province	Filling Data	Worst	1	2.1	766.363	0.0364	0.0138	0.8895	0.0119	0.0484	0.07644	0.02898	1.86795	0.02499	0.10164	27.9006	10.5777	681.802	9.12135	37.0986
ACEH	KAB. ACEH UTARA	MUARA BATU	Average of Province	Filling Data	Worst	1	2.6	948.974	0.0364	0.0138	0.8895	0.0119	0.0484	0.09464	0.03588	2.3127	0.03094	0.12584	34.5436	13.0962	844.135	11.2931	45.9316
ACEH	KAB. ACEH UTARA	KUTA MAKMUR	Average of Province	Filling Data	Worst	1	2.566	936.644	0.0364	0.0138	0.8895	0.0119	0.0484	0.0934024	0.0354108	2.28246	0.0305354	0.124194	34.0919	12.9249	833.097	11.1454	45.331
ACEH	KAB. ACEH UTARA	NISAM	Average of Province	Filling Data	Worst	1	1.872	683.322	0.0364	0.0138	0.8895	0.0119	0.0484	0.0681408	0.0258336	1.66514	0.0222768	0.0906048	24.8714	9.42926	607.778	8.13103	33.0708
ACEH	KAB. SIMEULUE	TELUK DALAM	SIPSN	2022	Good	4	0.676	246.711	0.13	0.0155	0.755	0.0711	0.0284	0.08788	0.010478	0.51038	0.0480636	0.0191984	32.0762	3.82447	186.289	17.5432	7.00742
ACEH	KAB. SIMEULUE	SALANG	SIPSN	2022	Good	4	1.076	392.767	0.13	0.0155	0.755	0.0711	0.0284	0.13988	0.016678	0.81238	0.0765036	0.0305584	51.0562	6.08747	296.519	27.9238	11.1538
ACEH	KAB. SIMEULUE	ALAFAN	SIPSN	2022	Good	4	0.596	217.663	0.13	0.0155	0.755	0.0711	0.0284	0.07748	0.009238	0.44998	0.0423756	0.0169264	28.2802	3.37187	164.243	15.4671	6.17814
ACEH	KAB. SIMEULUE	SIMEULUE BARAT	SIPSN	2022	Good	4	1.433	522.943	0.13	0.0155	0.755	0.0711	0.0284	0.18629	0.0222115	1.08191	0.101886	0.0406972	67.9959	8.1072	394.899	37.1885	14.8545
ACEH	KAB. SIMEULUE	TEUPAH SELATAN	SIPSN	2022	Good	4	1.114	406.667	0.13	0.0155	0.755	0.0711	0.0284	0.14482	0.017267	0.84107	0.0792054	0.0316376	52.8593	6.30246	306.991	28.91	11.5477
ACEH	KAB. SIMEULUE	TEUPAH BARAT	SIPSN	2022	Good	4	0.96	350.379	0.13	0.0155	0.755	0.0711	0.0284	0.1248	0.01488	0.7248	0.068256	0.027264	45.552	5.4312	264.552	24.9134	9.95136
ACEH	KAB. SIMEULUE	TEUPAH TENGAH	SIPSN	2022	Good	4	0.8	292.068	0.13	0.0155	0.755	0.0711	0.0284	0.104	0.0124	0.604	0.05688	0.02272	37.96	4.526	220.46	20.7612	8.2928
ACEH	KAB. SIMEULUE	SIMEULUE TENGAH	SIPSN	2022	Good	4	0.889	324.645	0.13	0.0155	0.755	0.0711	0.0284	0.11557	0.0137795	0.671195	0.0632079	0.0252476	42.1831	5.02952	244.986	23.0709	9.21537
ACEH	KAB. SIMEULUE	SIMEULUE CUT	SIPSN	2022	Good	4	0.41	149.627	0.13	0.0155	0.755	0.0711	0.0284	0.0533	0.006355	0.30955	0.029151	0.011644	19.4545	2.31957	112.986	10.6401	4.25006
ACEH	KAB. SIMEULUE	SIMEULUE TIMUR	SIPSN	2022	Good	4	3.251	1186.73	0.13	0.0155	0.755	0.0711	0.0284	0.42263	0.0503905	2.4545	0.231146	0.0923284	154.26	18.3925	895.894	84.3683	33.6999
ACEH	KAB. ACEH SINGKIL	KOTA BAHARU	SIPSN	2022	Good	4	0.608	222	0.0857922	0.0187	0.758708	0.0791	0.0577	0.0521617	0.0113696	0.461294	0.0480928	0.0350816	19.039	4.1499	168.372	17.5539	12.8048
ACEH	KAB. ACEH SINGKIL	DANAU PARIS	SIPSN	2022	Good	4	0.73	266.512	0.0857922	0.0187	0.758708	0.0791	0.0577	0.0626283	0.013651	0.553857	0.057743	0.042121	22.8593	4.98262	202.158	21.0762	15.3742
ACEH	KAB. ACEH SINGKIL	SURO MAKMUR	SIPSN	2022	Good	4	0.827	301.937	0.0857922	0.0187	0.758708	0.0791	0.0577	0.0709502	0.0154649	0.627451	0.0654157	0.0477179	25.8968	5.64469	229.02	23.8767	17.417
ACEH	KAB. ACEH SINGKIL	SIMPANG KANAN	SIPSN	2022	Good	4	1.527	557.353	0.0857922	0.0187	0.758708	0.0791	0.0577	0.131005	0.0285549	1.15855	0.120786	0.0881079	47.8167	10.4225	422.87	44.0868	32.1594
ACEH	KAB. ACEH SINGKIL	SINGKIL	SIPSN	2022	Good	4	1.842	672.156	0.0857922	0.0187	0.758708	0.0791	0.0577	0.158029	0.0344454	1.39754	0.145702	0.106283	57.6807	12.5726	510.102	53.1813	38.7934
ACEH	KAB. ACEH SINGKIL	SINGKOHOR	SIPSN	2022	Good	4	0.675	246.527	0.0857922	0.0187	0.758708	0.0791	0.0577	0.0579098	0.0126225	0.512128	0.0533925	0.0389475	21.1371	4.60721	186.927	19.4883	14.2158
ACEH	KAB. ACEH SINGKIL	PULAU BANYAK	SIPSN	2022	Good	4	0.418	152.697	0.0857922	0.0187	0.758708	0.0791	0.0577	0.0358612	0.0078166	0.31714	0.0330638	0.0241186	13.0893	2.85306	115.756	12.0683	8.80329
ACEH	KAB. ACEH SINGKIL	PULAU BANYAK BARAT	SIPSN	2022	Good	4	0.281	102.456	0.0857922	0.0187	0.758708	0.0791	0.0577	0.0241076	0.0052547	0.213197	0.0222271	0.0162137	8.79928	1.91797	77.8169	8.11289	5.918
ACEH	KAB. ACEH SINGKIL	KUALA BARU	SIPSN	2022	Good	4	0.237	86.587	0.0857922	0.0187	0.758708	0.0791	0.0577	0.0203328	0.0044319	0.179814	0.0187467	0.0136749	7.42146	1.61764	65.632	6.84255	4.99134
ACEH	KAB. ACEH SINGKIL	GUNUNG MERIAH	SIPSN	2022	Good	4	3.733	1362.52	0.0857922	0.0187	0.758708	0.0791	0.0577	0.320262	0.0698071	2.83226	0.29528	0.215394	116.896	25.4796	1033.77	107.777	78.6188
ACEH	KAB. ACEH SINGKIL	SINGKIL UTARA	SIPSN	2022	Good	4	0.976	356.095	0.0857922	0.0187	0.758708	0.0791	0.0577	0.0837332	0.0182512	0.740499	0.0772016	0.0563152	30.5626	6.66169	270.282	28.1786	20.555
ACEH	KAB. BIREUEN	PEUSANGAN SELATAN	Average of Province	Filling Data	Worst	1	1.157	422.453	0.1171	0	0.8722	0.0097	0.001	0.135485	0	1.00914	0.0112229	0.001157	49.4519	0	368.334	4.09636	0.422305
ACEH	KAB. BIREUEN	JEUMPA	Average of Province	Filling Data	Worst	1	2.961	1080.69	0.1171	0	0.8722	0.0097	0.001	0.346733	0	2.58258	0.0287217	0.002961	126.558	0	942.643	10.4834	1.08076
ACEH	KAB. BIREUEN	SIMPANG MAMPLAM	Average of Province	Filling Data	Worst	1	2.172	792.95	0.1171	0	0.8722	0.0097	0.001	0.254341	0	1.89442	0.0210684	0.002172	92.8345	0	691.463	7.68997	0.79278
ACEH	KAB. BIREUEN	PEUDADA	Average of Province	Filling Data	Worst	1	2.206	805.168	0.1171	0	0.8722	0.0097	0.001	0.258323	0	1.92407	0.0213982	0.002206	94.2877	0	702.287	7.81034	0.80519
ACEH	KAB. BIREUEN	KOTA JUANG	Average of Province	Filling Data	Worst	1	3.688	1345.94	0.1171	0	0.8722	0.0097	0.001	0.431865	0	3.21667	0.0357736	0.003688	157.631	0	1174.09	13.0574	1.34612
ACEH	KAB. BIREUEN	JULI	Average of Province	Filling Data	Worst	1	2.686	980.475	0.1171	0	0.8722	0.0097	0.001	0.314531	0	2.34273	0.0260542	0.002686	114.804	0	855.096	9.50978	0.98039
ACEH	KAB. BIREUEN	SAMALANGA	Average of Province	Filling Data	Worst	1	2.035	742.798	0.1171	0	0.8722	0.0097	0.001	0.238299	0	1.77493	0.0197395	0.002035	86.979	0	647.848	7.20492	0.742775
ACEH	KAB. BIREUEN	JANGKA	Average of Province	Filling Data	Worst	1	2.297	838.547	0.1171	0	0.8722	0.0097	0.001	0.268979	0	2.00344	0.0222809	0.002297	98.1772	0	731.257	8.13253	0.838405
ACEH	KAB. BIREUEN	PEUSANGAN	Average of Province	Filling Data	Worst	1	4.156	1516.78	0.1171	0	0.8722	0.0097	0.001	0.486668	0	3.62486	0.0403132	0.004156	177.634	0	1323.08	14.7143	1.51694
ACEH	KAB. BIREUEN	JEUNIEB	Average of Province	Filling Data	Worst	1	1.991	726.72	0.1171	0	0.8722	0.0097	0.001	0.233146	0	1.73655	0.0193127	0.001991	85.0983	0	633.841	7.04914	0.726715
ACEH	KAB. BIREUEN	KUTA BLANG	Average of Province	Filling Data	Worst	1	1.779	649.216	0.1171	0	0.8722	0.0097	0.001	0.208321	0	1.55164	0.0172563	0.001779	76.0371	0	566.35	6.29855	0.649335
ACEH	KAB. BIREUEN	PEULIMBANG	Average of Province	Filling Data	Worst	1	0.98	357.584	0.1171	0	0.8722	0.0097	0.001	0.114758	0	0.854756	0.009506	0.00098	41.8867	0	311.986	3.46969	0.3577
ACEH	KAB. BIREUEN	MAKMUR	Average of Province	Filling Data	Worst	1	1.236	451.138	0.1171	0	0.8722	0.0097	0.001	0.144736	0	1.07804	0.0119892	0.001236	52.8285	0	393.484	4.37606	0.45114
ACEH	KAB. BIREUEN	GANDAPURA	Average of Province	Filling Data	Worst	1	1.892	690.592	0.1171	0	0.8722	0.0097	0.001	0.221553	0	1.6502	0.0183524	0.001892	80.8669	0	602.324	6.69863	0.69058
ACEH	KAB. BIREUEN	PEUSANGAN SIBLAH KRUENG	Average of Province	Filling Data	Worst	1	0.946	345.449	0.1171	0	0.8722	0.0097	0.001	0.110777	0	0.825101	0.0091762	0.000946	40.4335	0	301.162	3.34931	0.34529
ACEH	KAB. BIREUEN	KUALA	Average of Province	Filling Data	Worst	1	1.498	546.72	0.1171	0	0.8722	0.0097	0.001	0.175416	0	1.30656	0.0145306	0.001498	64.0268	0	476.893	5.30367	0.54677
ACEH	KAB. BIREUEN	PANDRAH	Average of Province	Filling Data	Worst	1	0.704	257.115	0.1171	0	0.8722	0.0097	0.001	0.0824384	0	0.614029	0.0068288	0.000704	30.09	0	224.121	2.49251	0.25696
ACEH	KAB. ACEH BARAT DAYA	TANGAN-TANGAN	SIPSN	2022	Good	4	1.283	468.222	0.296782	0.0092	0.548518	0.0944	0.0511	0.380771	0.0118036	0.703748	0.121115	0.0655613	138.982	4.30831	256.868	44.207	23.9299
ACEH	KAB. ACEH BARAT DAYA	LEMBAH SABIL	SIPSN	2022	Good	4	1.032	376.65	0.296782	0.0092	0.548518	0.0944	0.0511	0.306279	0.0094944	0.56607	0.0974208	0.0527352	111.792	3.46546	206.616	35.5586	19.2483
ACEH	KAB. ACEH BARAT DAYA	BABAH ROT	SIPSN	2022	Good	4	1.956	713.979	0.296782	0.0092	0.548518	0.0944	0.0511	0.580506	0.0179952	1.0729	0.184646	0.0999516	211.885	6.56825	391.609	67.3959	36.4823
ACEH	KAB. ACEH BARAT DAYA	JEUMPA	SIPSN	2022	Good	4	1.046	381.715	0.296782	0.0092	0.548518	0.0944	0.0511	0.310434	0.0096232	0.57375	0.0987424	0.0534506	113.308	3.51247	209.419	36.041	19.5095
ACEH	KAB. ACEH BARAT DAYA	SUSOH	SIPSN	2022	Good	4	2.3	839.407	0.296782	0.0092	0.548518	0.0944	0.0511	0.682599	0.02116	1.26159	0.21712	0.11753	249.149	7.7234	460.481	79.2488	42.8985
ACEH	KAB. ACEH BARAT DAYA	BLANGPIDIE	SIPSN	2022	Good	4	2.167	790.922	0.296782	0.0092	0.548518	0.0944	0.0511	0.643127	0.0199364	1.18864	0.204565	0.110734	234.741	7.27679	433.853	74.6662	40.4178
ACEH	KAB. ACEH BARAT DAYA	SETIA	SIPSN	2022	Good	4	0.804	293.509	0.296782	0.0092	0.548518	0.0944	0.0511	0.238613	0.0073968	0.441008	0.0758976	0.0410844	87.0937	2.69983	160.968	27.7026	14.9958
ACEH	KAB. ACEH BARAT DAYA	MANGGENG	SIPSN	2022	Good	4	1.421	518.573	0.296782	0.0092	0.548518	0.0944	0.0511	0.421727	0.0130732	0.779444	0.134142	0.0726131	153.931	4.77172	284.497	48.962	26.5038
ACEH	KAB. ACEH BARAT DAYA	KUALA BATEE	SIPSN	2022	Good	4	2.036	743.07	0.296782	0.0092	0.548518	0.0944	0.0511	0.604248	0.0187312	1.11678	0.192198	0.10404	220.551	6.83689	407.626	70.1524	37.9745
ACEH	KAB. GAYO LUES	KUTAPANJANG	SIPSN	2022	Good	4	0.801	292.306	0.1688	0.0169	0.7128	0.086	0.0155	0.135209	0.0135369	0.570953	0.068886	0.0124155	49.3512	4.94097	208.398	25.1434	4.53166
ACEH	KAB. GAYO LUES	PINING	SIPSN	2022	Good	4	0.405	147.771	0.1688	0.0169	0.7128	0.086	0.0155	0.068364	0.0068445	0.288684	0.03483	0.0062775	24.9529	2.49824	105.37	12.7129	2.29129
ACEH	KAB. GAYO LUES	BLANGJERANGO	SIPSN	2022	Good	4	0.613	223.698	0.1688	0.0169	0.7128	0.086	0.0155	0.103474	0.0103597	0.436946	0.052718	0.0095015	37.7682	3.78129	159.485	19.2421	3.46805
ACEH	KAB. GAYO LUES	TERIPE JAYA	SIPSN	2022	Good	4	0.459	167.598	0.1688	0.0169	0.7128	0.086	0.0155	0.0774792	0.0077571	0.327175	0.039474	0.0071145	28.2799	2.83134	119.419	14.408	2.59679
ACEH	KAB. GAYO LUES	PUTERI BETUNG	SIPSN	2022	Good	4	0.757	276.415	0.1688	0.0169	0.7128	0.086	0.0155	0.127782	0.0127933	0.53959	0.065102	0.0117335	46.6403	4.66955	196.95	23.7622	4.28273
ACEH	KAB. GAYO LUES	RIKIT GAIB	SIPSN	2022	Good	4	0.388	141.706	0.1688	0.0169	0.7128	0.086	0.0155	0.0654944	0.0065572	0.276566	0.033368	0.006014	23.9055	2.39338	100.947	12.1793	2.19511
ACEH	KAB. GAYO LUES	DABUN GELANG	SIPSN	2022	Good	4	0.56	204.57	0.1688	0.0169	0.7128	0.086	0.0155	0.094528	0.009464	0.399168	0.04816	0.00868	34.5027	3.45436	145.696	17.5784	3.1682
ACEH	KAB. GAYO LUES	TERANGUN	SIPSN	2022	Good	4	0.753	274.84	0.1688	0.0169	0.7128	0.086	0.0155	0.127106	0.0127257	0.536738	0.064758	0.0116715	46.3938	4.64488	195.91	23.6367	4.2601
ACEH	KAB. GAYO LUES	BLANGKEJEREN	SIPSN	2022	Good	4	2.507	914.938	0.1688	0.0169	0.7128	0.086	0.0155	0.423182	0.0423683	1.78699	0.215602	0.0388585	154.461	15.4644	652.251	78.6947	14.1834
ACEH	KAB. GAYO LUES	PANTAN CUACA	SIPSN	2022	Good	4	0.362	131.968	0.1688	0.0169	0.7128	0.086	0.0155	0.0611056	0.0061178	0.258034	0.031132	0.005611	22.3035	2.233	94.1823	11.3632	2.04801
ACEH	KAB. GAYO LUES	BLANGPEGAYON	SIPSN	2022	Good	4	0.568	207.428	0.1688	0.0169	0.7128	0.086	0.0155	0.0958784	0.0095992	0.40487	0.048848	0.008804	34.9956	3.50371	147.778	17.8295	3.21346
ACEH	KAB. ACEH JAYA	PASIE RAYA	SIPSN	2022	Good	4	0.656	239.426	0.1688	0.0169	0.7128	0.086	0.0155	0.110733	0.0110864	0.467597	0.056416	0.010168	40.4175	4.04654	170.673	20.5918	3.71132
ACEH	KAB. ACEH JAYA	SAMPOI NIET	SIPSN	2022	Good	4	0.748	272.982	0.1688	0.0169	0.7128	0.086	0.0155	0.126262	0.0126412	0.533174	0.064328	0.011594	46.0858	4.61404	194.609	23.4797	4.23181
ACEH	KAB. ACEH JAYA	DARUL HIKMAH	SIPSN	2022	Good	4	0.661	241.126	0.1688	0.0169	0.7128	0.086	0.0155	0.111577	0.0111709	0.471161	0.056846	0.0102455	40.7255	4.07738	171.974	20.7488	3.73961
ACEH	KAB. ACEH JAYA	INDRA JAYA	SIPSN	2022	Good	4	0.689	251.522	0.1688	0.0169	0.7128	0.086	0.0155	0.116303	0.0116441	0.491119	0.059254	0.0106795	42.4507	4.2501	179.259	21.6277	3.89802
ACEH	KAB. ACEH JAYA	SETIA BAKTI	SIPSN	2022	Good	4	0.864	315.269	0.1688	0.0169	0.7128	0.086	0.0155	0.145843	0.0146016	0.615859	0.074304	0.013392	53.2328	5.32958	224.789	27.121	4.88808
ACEH	KAB. ACEH JAYA	JAYA	SIPSN	2022	Good	4	1.445	527.37	0.1688	0.0169	0.7128	0.086	0.0155	0.243916	0.0244205	1.03	0.12427	0.0223975	89.0293	8.91348	375.949	45.3585	8.17509
ACEH	KAB. ACEH JAYA	KRUENG SABEE	SIPSN	2022	Good	4	1.694	618.376	0.1688	0.0169	0.7128	0.086	0.0155	0.285947	0.0286286	1.20748	0.145684	0.026257	104.371	10.4494	440.731	53.1747	9.5838
ACEH	KAB. ACEH JAYA	TEUNOM	SIPSN	2022	Good	4	1.286	469.488	0.1688	0.0169	0.7128	0.086	0.0155	0.217077	0.0217334	0.916661	0.110596	0.019933	79.233	7.93269	334.581	40.3675	7.27555
ACEH	KAB. ACEH JAYA	PANGA	SIPSN	2022	Good	4	0.824	300.907	0.1688	0.0169	0.7128	0.086	0.0155	0.139091	0.0139256	0.587347	0.070864	0.012772	50.7683	5.08284	214.382	25.8654	4.66178
ACEH	KAB. NAGAN RAYA	BEUTONG	SIPSN	2022	Good	4	1.073	391.685	0.0561	0.0139	0.7949	0.0798	0.0553	0.0601953	0.0149147	0.852928	0.0856254	0.0593369	21.9713	5.44387	311.319	31.2533	21.658
ACEH	KAB. NAGAN RAYA	SUKA MAKMUE	SIPSN	2022	Good	4	0.777	283.69	0.0561	0.0139	0.7949	0.0798	0.0553	0.0435897	0.0108003	0.617637	0.0620046	0.0429681	15.9102	3.94211	225.438	22.6317	15.6834
ACEH	KAB. NAGAN RAYA	KUALA PESISIR	SIPSN	2022	Good	4	1.364	497.985	0.0561	0.0139	0.7949	0.0798	0.0553	0.0765204	0.0189596	1.08424	0.108847	0.0754292	27.9299	6.92025	395.749	39.7292	27.5317
ACEH	KAB. NAGAN RAYA	KUALA	SIPSN	2022	Good	4	1.738	634.276	0.0561	0.0139	0.7949	0.0798	0.0553	0.0975018	0.0241582	1.38154	0.138692	0.0961114	35.5882	8.81774	504.261	50.6227	35.0807
ACEH	KAB. NAGAN RAYA	SEUNAGAN TIMUR	SIPSN	2022	Good	4	1.107	404.236	0.0561	0.0139	0.7949	0.0798	0.0553	0.0621027	0.0153873	0.879954	0.0883386	0.0612171	22.6675	5.61636	321.183	32.2436	22.3442
ACEH	KAB. NAGAN RAYA	TADU RAYA	SIPSN	2022	Good	4	1.163	424.508	0.0561	0.0139	0.7949	0.0798	0.0553	0.0652443	0.0161657	0.924469	0.0928074	0.0643139	23.8142	5.90048	337.431	33.8747	23.4746
ACEH	KAB. NAGAN RAYA	DARUL MAKMUR	SIPSN	2022	Good	4	3.842	1402.26	0.0561	0.0139	0.7949	0.0798	0.0553	0.215536	0.0534038	3.05401	0.306592	0.212463	78.6707	19.4924	1114.71	111.906	77.5488
ACEH	KAB. NAGAN RAYA	TRIPA MAKMUR	SIPSN	2022	Good	4	0.718	261.891	0.0561	0.0139	0.7949	0.0798	0.0553	0.0402798	0.0099802	0.570738	0.0572964	0.0397054	14.7021	3.64277	208.319	20.9132	14.4925
ACEH	KAB. NAGAN RAYA	BEUTONG ATEUH BANGGALANG	SIPSN	2022	Good	4	0.157	57.482	0.0561	0.0139	0.7949	0.0798	0.0553	0.0088077	0.0021823	0.124799	0.0125286	0.0086821	3.21481	0.796539	45.5517	4.57294	3.16897
ACEH	KAB. NAGAN RAYA	SEUNAGAN	SIPSN	2022	Good	4	1.246	454.832	0.0561	0.0139	0.7949	0.0798	0.0553	0.0699006	0.0173194	0.990445	0.0994308	0.0689038	25.5137	6.32158	361.513	36.2922	25.1499
ACEH	KAB. ACEH TAMIANG	TAMIANG HULU	SIPSN	2022	Good	4	2.304	840.904	0.309806	0.006	0.653394	0.0143	0.0165	0.713793	0.013824	1.50542	0.0329472	0.038016	260.534	5.04576	549.478	12.0257	13.8758
ACEH	KAB. ACEH TAMIANG	KARANG BARU	SIPSN	2022	Good	4	5.348	1952.13	0.309806	0.006	0.653394	0.0143	0.0165	1.65684	0.032088	3.49435	0.0764764	0.088242	604.747	11.7121	1275.44	27.9139	32.2083
ACEH	KAB. ACEH TAMIANG	SERUWAY	SIPSN	2022	Good	4	3.331	1215.85	0.309806	0.006	0.653394	0.0143	0.0165	1.03196	0.019986	2.17646	0.0476333	0.0549615	376.667	7.29489	794.406	17.3862	20.0609
ACEH	KAB. ACEH TAMIANG	BANDAR PUSAKA	SIPSN	2022	Good	4	1.735	633.187	0.309806	0.006	0.653394	0.0143	0.0165	0.537513	0.01041	1.13364	0.0248105	0.0286275	196.192	3.79965	413.778	9.05583	10.449
ACEH	KAB. ACEH TAMIANG	KEJURUAN MUDA	SIPSN	2022	Good	4	4.402	1606.78	0.309806	0.006	0.653394	0.0143	0.0165	1.36377	0.026412	2.87624	0.0629486	0.072633	497.774	9.64038	1049.83	22.9762	26.511
ACEH	KAB. ACEH TAMIANG	KOTA KUALASINPANG	SIPSN	2022	Good	4	2.227	812.847	0.309806	0.006	0.653394	0.0143	0.0165	0.689938	0.013362	1.45511	0.0318461	0.0367455	251.827	4.87713	531.115	11.6238	13.4121
ACEH	KAB. ACEH TAMIANG	TENGGULUN	SIPSN	2022	Good	4	2.182	796.576	0.309806	0.006	0.653394	0.0143	0.0165	0.675996	0.013092	1.42571	0.0312026	0.036003	246.739	4.77858	520.383	11.3889	13.1411
ACEH	KAB. ACEH TAMIANG	RANTAU	SIPSN	2022	Good	4	4.563	1665.54	0.309806	0.006	0.653394	0.0143	0.0165	1.41364	0.027378	2.98144	0.0652509	0.0752895	515.98	9.99297	1088.22	23.8166	27.4807
ACEH	KAB. ACEH TAMIANG	MANYAK PAYED	SIPSN	2022	Good	4	4.162	1519.02	0.309806	0.006	0.653394	0.0143	0.0165	1.28941	0.024972	2.71943	0.0595166	0.068673	470.635	9.11478	992.591	21.7236	25.0656
ACEH	KAB. ACEH TAMIANG	BENDAHARA	SIPSN	2022	Good	4	2.784	1016.34	0.309806	0.006	0.653394	0.0143	0.0165	0.8625	0.016704	1.81905	0.0398112	0.045936	314.812	6.09696	663.953	14.5311	16.7666
ACEH	KAB. ACEH TAMIANG	SEKERAK	SIPSN	2022	Good	4	0.919	335.32	0.309806	0.006	0.653394	0.0143	0.0165	0.284712	0.005514	0.600469	0.0131417	0.0151635	103.92	2.01261	219.171	4.79672	5.53468
ACEH	KAB. ACEH TAMIANG	BANDA MULIA	SIPSN	2022	Good	4	1.549	565.243	0.309806	0.006	0.653394	0.0143	0.0165	0.479889	0.009294	1.01211	0.0221507	0.0255585	175.16	3.39231	369.419	8.08501	9.32885
ACEH	KAB. BENER MERIAH	TIMANG GAJAH	SIPSN	2022	Good	4	1.823	665.407	0.377151	0.0669	0.363049	0.1203	0.0726	0.687547	0.121959	0.661838	0.219307	0.13235	250.955	44.5149	241.571	80.047	48.3077
ACEH	KAB. BENER MERIAH	WIH PESAM	SIPSN	2022	Good	4	2.052	748.798	0.377151	0.0669	0.363049	0.1203	0.0726	0.773914	0.137279	0.744976	0.246856	0.148975	282.479	50.1068	271.916	90.1023	54.3759
ACEH	KAB. BENER MERIAH	BENER KELIPAH	SIPSN	2022	Good	4	0.438	159.784	0.377151	0.0669	0.363049	0.1203	0.0726	0.165192	0.0293022	0.159015	0.0526914	0.0317988	60.2952	10.6953	58.0406	19.2324	11.6066
ACEH	KAB. BENER MERIAH	PINTU RIME GAYO	SIPSN	2022	Good	4	1.272	464.365	0.377151	0.0669	0.363049	0.1203	0.0726	0.479736	0.0850968	0.461798	0.153022	0.0923472	175.104	31.0603	168.556	55.8529	33.7067
ACEH	KAB. BENER MERIAH	SYIAH UTAMA	SIPSN	2022	Good	4	0.204	74.527	0.377151	0.0669	0.363049	0.1203	0.0726	0.0769389	0.0136476	0.0740619	0.0245412	0.0148104	28.0827	4.98137	27.0326	8.95754	5.4058
ACEH	KAB. BENER MERIAH	GAJAH PUTIH	SIPSN	2022	Good	4	0.785	286.416	0.377151	0.0669	0.363049	0.1203	0.0726	0.296064	0.0525165	0.284993	0.0944355	0.056991	108.063	19.1685	104.023	34.469	20.8017
ACEH	KAB. BENER MERIAH	MESIDAH	SIPSN	2022	Good	4	0.463	169.085	0.377151	0.0669	0.363049	0.1203	0.0726	0.174621	0.0309747	0.168092	0.0556989	0.0336138	63.7367	11.3058	61.3534	20.3301	12.269
ACEH	KAB. BENER MERIAH	PERMATA	SIPSN	2022	Good	4	1.792	653.977	0.377151	0.0669	0.363049	0.1203	0.0726	0.675855	0.119885	0.650583	0.215578	0.130099	246.687	43.758	237.463	78.6858	47.4862
ACEH	KAB. BENER MERIAH	BUKIT	SIPSN	2022	Good	4	2.517	918.641	0.377151	0.0669	0.363049	0.1203	0.0726	0.94929	0.168387	0.913794	0.302795	0.182734	346.491	61.4614	333.535	110.52	66.698
ACEH	KAB. BENER MERIAH	BANDAR	SIPSN	2022	Good	4	2.347	856.623	0.377151	0.0669	0.363049	0.1203	0.0726	0.885174	0.157014	0.852075	0.282344	0.170392	323.089	57.3102	311.007	103.056	62.1932
ACEH	KAB. PIDIE JAYA	MEURAH DUA	SIPSN	2022	Good	4	1.613	588.714	0.109609	0.0094	0.849191	0.0309	0.0009	0.176799	0.0151622	1.36974	0.0498417	0.0014517	64.5318	5.5342	499.957	18.1922	0.529871
ACEH	KAB. PIDIE JAYA	TRIENGGADENG	SIPSN	2022	Good	4	2.984	1089.29	0.109609	0.0094	0.849191	0.0309	0.0009	0.327073	0.0280496	2.53399	0.0922056	0.0026856	119.382	10.2381	924.905	33.655	0.980244
ACEH	KAB. PIDIE JAYA	JANGKA BUYA	SIPSN	2022	Good	4	1.327	484.218	0.109609	0.0094	0.849191	0.0309	0.0009	0.145451	0.0124738	1.12688	0.0410043	0.0011943	53.0897	4.55294	411.31	14.9666	0.435919
ACEH	KAB. PIDIE JAYA	ULIM	SIPSN	2022	Good	4	2.053	749.422	0.109609	0.0094	0.849191	0.0309	0.0009	0.225027	0.0192982	1.74339	0.0634377	0.0018477	82.135	7.04384	636.337	23.1548	0.67441
ACEH	KAB. PIDIE JAYA	BANDAR DUA	SIPSN	2022	Good	4	3.515	1282.84	0.109609	0.0094	0.849191	0.0309	0.0009	0.385276	0.033041	2.98491	0.108613	0.0031635	140.626	12.06	1089.49	39.6439	1.15468
ACEH	KAB. PIDIE JAYA	MEUREUDU	SIPSN	2022	Good	4	2.839	1036.08	0.109609	0.0094	0.849191	0.0309	0.0009	0.31118	0.0266866	2.41085	0.0877251	0.0025551	113.581	9.74061	879.961	32.0197	0.932611
ACEH	KAB. PIDIE JAYA	BANDAR BARU	SIPSN	2022	Good	4	4.61	1682.83	0.109609	0.0094	0.849191	0.0309	0.0009	0.505298	0.043334	3.91477	0.142449	0.004149	184.434	15.8169	1428.89	51.9939	1.51438
ACEH	KAB. PIDIE JAYA	PANTERAJA	SIPSN	2022	Good	4	1.131	412.656	0.109609	0.0094	0.849191	0.0309	0.0009	0.123968	0.0106314	0.960435	0.0349479	0.0010179	45.2483	3.88046	350.559	12.756	0.371533
ACEH	KOTA BANDA ACEH	BAITURRAHMAN	Sampling	2022	Best	5	5.525	2016.75	0.8611	0.0071	0.1238	0.0014	0.0066	4.75758	0.0392275	0.683995	0.007735	0.036465	1736.52	14.318	249.658	2.82328	13.3097
ACEH	KOTA BANDA ACEH	SYIAH KUALA	Sampling	2022	Best	5	5.779	2109.22	0.8611	0.0071	0.1238	0.0014	0.0066	4.9763	0.0410309	0.71544	0.0080906	0.0381414	1816.35	14.9763	261.136	2.95307	13.9216
ACEH	KOTA BANDA ACEH	BANDA RAYA	Sampling	2022	Best	5	4.466	1630.06	0.8611	0.0071	0.1238	0.0014	0.0066	3.84567	0.0317086	0.552891	0.0062524	0.0294756	1403.67	11.5736	201.805	2.28213	10.7586
ACEH	KOTA BANDA ACEH	JAYA BARU	Sampling	2022	Best	5	4.562	1665.11	0.8611	0.0071	0.1238	0.0014	0.0066	3.92834	0.0323902	0.564776	0.0063868	0.0301092	1433.84	11.8224	206.143	2.33118	10.9899
ACEH	KOTA BANDA ACEH	KUTA RAJA	Sampling	2022	Best	5	2.508	915.467	0.8611	0.0071	0.1238	0.0014	0.0066	2.15964	0.0178068	0.31049	0.0035112	0.0165528	788.268	6.49948	113.329	1.28159	6.04177
ACEH	KOTA BANDA ACEH	LUENG BATA	Sampling	2022	Best	5	4.338	1583.51	0.8611	0.0071	0.1238	0.0014	0.0066	3.73545	0.0307998	0.537044	0.0060732	0.0286308	1363.44	11.2419	196.021	2.21672	10.4502
ACEH	KOTA BANDA ACEH	KUTA ALAM	Sampling	2022	Best	5	7.255	2648.06	0.8611	0.0071	0.1238	0.0014	0.0066	6.24728	0.0515105	0.898169	0.010157	0.047883	2280.26	18.8013	327.832	3.70731	17.4773
ACEH	KOTA BANDA ACEH	MEURAXA	Sampling	2022	Best	5	4.505	1644.43	0.8611	0.0071	0.1238	0.0014	0.0066	3.87926	0.0319855	0.557719	0.006307	0.029733	1415.93	11.6747	203.567	2.30206	10.8525
ACEH	KOTA BANDA ACEH	ULEE KARENG	Sampling	2022	Best	5	4.782	1745.52	0.8611	0.0071	0.1238	0.0014	0.0066	4.11778	0.0339522	0.592012	0.0066948	0.0315612	1502.99	12.3926	216.084	2.4436	11.5198
ACEH	KOTA SABANG	SUKAJAYA	SIPSN	2022	Good	4	2.656	969.404	0.582945	0	0.354655	0.0475	0.0149	1.5483	0	0.941964	0.12616	0.0395744	565.13	0	343.817	46.0484	14.4447
ACEH	KOTA SABANG	SUKAKARYA	SIPSN	2022	Good	4	1.807	659.508	0.582945	0	0.354655	0.0475	0.0149	1.05338	0	0.640862	0.0858325	0.0269243	384.484	0	233.915	31.3289	9.82737
ACEH	KOTA SABANG	SUKAMAKMUE	SIPSN	2022	Good	4	1.15	419.79	0.582945	0	0.354655	0.0475	0.0149	0.670387	0	0.407853	0.054625	0.017135	244.691	0	148.866	19.9381	6.25427
ACEH	KOTA LHOKSEUMAWE	BLANG MANGAT	Average of Province	Filling Data	Worst	1	2.303	840.507	0.4684	0.0039	0.4543	0.039	0.0344	1.07873	0.0089817	1.04625	0.089817	0.0792232	393.735	3.27832	381.882	32.7832	28.9165
ACEH	KOTA LHOKSEUMAWE	MUARA DUA	Average of Province	Filling Data	Worst	1	4.351	1588	0.4684	0.0039	0.4543	0.039	0.0344	2.03801	0.0169689	1.97666	0.169689	0.149674	743.873	6.19365	721.481	61.9365	54.6312
ACEH	KOTA LHOKSEUMAWE	BANDA SAKTI	Average of Province	Filling Data	Worst	1	6.607	2411.65	0.4684	0.0039	0.4543	0.039	0.0344	3.09472	0.0257673	3.00156	0.257673	0.227281	1129.57	9.40506	1095.57	94.0506	82.9575
ACEH	KOTA LHOKSEUMAWE	MUARA SATU	Average of Province	Filling Data	Worst	1	2.879	1050.97	0.4684	0.0039	0.4543	0.039	0.0344	1.34852	0.0112281	1.30793	0.112281	0.0990376	492.211	4.09826	477.394	40.9826	36.1487
ACEH	KOTA LANGSA	LANGSA BARO	SIPSN	2022	Good	4	4.213	1537.82	0.3973	0.0048	0.576	0.0088	0.0131	1.67382	0.0202224	2.42669	0.0370744	0.0551903	610.946	7.38118	885.741	13.5322	20.1445
ACEH	KOTA LANGSA	LANGSA TIMUR	SIPSN	2022	Good	4	1.306	476.599	0.3973	0.0048	0.576	0.0088	0.0131	0.518874	0.0062688	0.752256	0.0114928	0.0171086	189.389	2.28811	274.573	4.19487	6.24464
ACEH	KOTA LANGSA	LANGSA KOTA	SIPSN	2022	Good	4	2.987	1090.24	0.3973	0.0048	0.576	0.0088	0.0131	1.18674	0.0143376	1.72051	0.0262856	0.0391297	433.158	5.23322	627.987	9.59424	14.2823
ACEH	KOTA LANGSA	LANGSA LAMA	SIPSN	2022	Good	4	2.517	918.76	0.3973	0.0048	0.576	0.0088	0.0131	1	0.0120816	1.44979	0.0221496	0.0329727	365.001	4.40978	529.174	8.0846	12.035
ACEH	KOTA LANGSA	LANGSA BARAT	SIPSN	2022	Good	4	2.943	1074.11	0.3973	0.0048	0.576	0.0088	0.0131	1.16925	0.0141264	1.69517	0.0258984	0.0385533	426.778	5.15614	618.736	9.45292	14.072
ACEH	KOTA SUBULUSSALAM	SULTAN DAULAT	SIPSN	2022	Good	4	1.47	536.679	0.121	0.0138	0.7081	0.0749	0.0822	0.17787	0.020286	1.04091	0.110103	0.120834	64.9226	7.40439	379.931	40.1876	44.1044
ACEH	KOTA SUBULUSSALAM	PENANGGALAN	SIPSN	2022	Good	4	1.489	543.643	0.121	0.0138	0.7081	0.0749	0.0822	0.180169	0.0205482	1.05436	0.111526	0.122396	65.7617	7.50009	384.842	40.707	44.6745
ACEH	KOTA SUBULUSSALAM	RUNDENG	SIPSN	2022	Good	4	1.232	449.684	0.121	0.0138	0.7081	0.0749	0.0822	0.149072	0.0170016	0.872379	0.0922768	0.10127	54.4113	6.20558	318.418	33.681	36.9637
ACEH	KOTA SUBULUSSALAM	LONGKIB	SIPSN	2022	Good	4	0.57	207.881	0.121	0.0138	0.7081	0.0749	0.0822	0.06897	0.007866	0.403617	0.042693	0.046854	25.1741	2.87109	147.32	15.5829	17.1017
ACEH	KOTA SUBULUSSALAM	SIMPANG KIRI	SIPSN	2022	Good	4	3.116	1137.49	0.121	0.0138	0.7081	0.0749	0.0822	0.377036	0.0430008	2.20644	0.233388	0.256135	137.618	15.6953	805.35	85.1868	93.4893
SUMATERA UTARA	KAB. TAPANULI TENGAH	BARUS	SIPSN	2022	Good	4	1.803	658.211	0.210111	0.0119	0.609189	0.0914	0.0774	0.378829	0.0214557	1.09837	0.164794	0.139552	138.273	7.83133	400.904	60.1499	50.9366
SUMATERA UTARA	KAB. TAPANULI TENGAH	SORKAM	SIPSN	2022	Good	4	1.682	613.808	0.210111	0.0119	0.609189	0.0914	0.0774	0.353406	0.0200158	1.02466	0.153735	0.130187	128.993	7.30577	374	56.1132	47.5182
SUMATERA UTARA	KAB. TAPANULI TENGAH	PANDAN	SIPSN	2022	Good	4	5.43	1982.1	0.210111	0.0119	0.609189	0.0914	0.0774	1.1409	0.064617	3.3079	0.496302	0.420282	416.429	23.5852	1207.38	181.15	153.403
SUMATERA UTARA	KAB. TAPANULI TENGAH	PINANGSORI	SIPSN	2022	Good	4	2.567	936.938	0.210111	0.0119	0.609189	0.0914	0.0774	0.539354	0.0305473	1.56379	0.234624	0.198686	196.864	11.1498	570.783	85.6377	72.5203
SUMATERA UTARA	KAB. TAPANULI TENGAH	MANDUAMAS	SIPSN	2022	Good	4	2.336	852.537	0.210111	0.0119	0.609189	0.0914	0.0774	0.490818	0.0277984	1.42307	0.21351	0.180806	179.149	10.1464	519.419	77.9313	65.9943
SUMATERA UTARA	KAB. TAPANULI TENGAH	KOLANG	SIPSN	2022	Good	4	2.101	766.98	0.210111	0.0119	0.609189	0.0914	0.0774	0.441442	0.0250019	1.27991	0.192031	0.162617	161.126	9.12569	467.166	70.0915	59.3554
SUMATERA UTARA	KAB. TAPANULI TENGAH	TAPIAN NAULI	SIPSN	2022	Good	4	2.006	732.324	0.210111	0.0119	0.609189	0.0914	0.0774	0.421482	0.0238714	1.22203	0.183348	0.155264	153.841	8.71306	446.042	66.9222	56.6715
SUMATERA UTARA	KAB. TAPANULI TENGAH	SIBABANGUN	SIPSN	2022	Good	4	1.834	669.402	0.210111	0.0119	0.609189	0.0914	0.0774	0.385343	0.0218246	1.11725	0.167628	0.141952	140.65	7.96598	407.797	61.1841	51.8123
SUMATERA UTARA	KAB. TAPANULI TENGAH	SOSORGADONG	SIPSN	2022	Good	4	1.503	548.683	0.210111	0.0119	0.609189	0.0914	0.0774	0.315796	0.0178857	0.915612	0.137374	0.116332	115.266	6.52828	334.198	50.1416	42.4613
SUMATERA UTARA	KAB. TAPANULI TENGAH	SORKAM BARAT	SIPSN	2022	Good	4	1.789	652.976	0.210111	0.0119	0.609189	0.0914	0.0774	0.375888	0.0212891	1.08984	0.163515	0.138469	137.199	7.77052	397.792	59.6828	50.541
SUMATERA UTARA	KAB. TAPANULI TENGAH	SIRANDORUNG	SIPSN	2022	Good	4	1.739	634.89	0.210111	0.0119	0.609189	0.0914	0.0774	0.365382	0.0206941	1.05938	0.158945	0.134599	133.365	7.55335	386.674	58.0148	49.1285
SUMATERA UTARA	KAB. TAPANULI TENGAH	ANDAM DEWI	SIPSN	2022	Good	4	1.686	615.252	0.210111	0.0119	0.609189	0.0914	0.0774	0.354247	0.0200634	1.02709	0.1541	0.130496	129.3	7.32314	374.889	56.2466	47.6312
SUMATERA UTARA	KAB. TAPANULI TENGAH	SITAHUIS	SIPSN	2022	Good	4	0.587	214.109	0.210111	0.0119	0.609189	0.0914	0.0774	0.123335	0.0069853	0.357594	0.0536518	0.0454338	45.0173	2.54963	130.522	19.5829	16.5833
SUMATERA UTARA	KAB. TAPANULI TENGAH	TUKKA	SIPSN	2022	Good	4	1.431	522.33	0.210111	0.0119	0.609189	0.0914	0.0774	0.300668	0.0170289	0.87175	0.130793	0.110759	109.744	6.21555	318.189	47.7396	40.4272
SUMATERA UTARA	KAB. TAPANULI TENGAH	BADIRI	SIPSN	2022	Good	4	2.777	1013.69	0.210111	0.0119	0.609189	0.0914	0.0774	0.583477	0.0330463	1.69172	0.253818	0.21494	212.969	12.0619	617.477	92.6435	78.453
SUMATERA UTARA	KAB. TAPANULI TENGAH	PASARIBU TOBING	SIPSN	2022	Good	4	0.755	275.407	0.210111	0.0119	0.609189	0.0914	0.0774	0.158634	0.0089845	0.459938	0.069007	0.058437	57.9012	3.27934	167.877	25.1876	21.3295
SUMATERA UTARA	KAB. TAPANULI TENGAH	BARUS UTARA	SIPSN	2022	Good	4	0.489	178.587	0.210111	0.0119	0.609189	0.0914	0.0774	0.102744	0.0058191	0.297894	0.0446946	0.0378486	37.5016	2.12397	108.731	16.3135	13.8147
SUMATERA UTARA	KAB. TAPANULI TENGAH	SUKA BANGUN	SIPSN	2022	Good	4	0.414	151.151	0.210111	0.0119	0.609189	0.0914	0.0774	0.0869858	0.0049266	0.252204	0.0378396	0.0320436	31.7498	1.79821	92.0546	13.8115	11.6959
SUMATERA UTARA	KAB. TAPANULI TENGAH	LUMUT	SIPSN	2022	Good	4	1.287	469.877	0.210111	0.0119	0.609189	0.0914	0.0774	0.270412	0.0153153	0.784027	0.117632	0.0996138	98.7005	5.59008	286.17	42.9356	36.359
SUMATERA UTARA	KAB. TAPANULI TENGAH	SARUDIK	SIPSN	2022	Good	4	2.032	741.818	0.210111	0.0119	0.609189	0.0914	0.0774	0.426945	0.0241808	1.23787	0.185725	0.157277	155.835	8.82599	451.824	67.7896	57.406
SUMATERA UTARA	KAB. TAPANULI UTARA	TARUTUNG	SIPSN	2021	Average	3	4.889	1784.36	0.0986327	0.0168	0.586167	0.0271	0.2713	0.482215	0.0821352	2.86577	0.132492	1.32639	176.009	29.9793	1046.01	48.3595	484.131
SUMATERA UTARA	KAB. TAPANULI UTARA	SIATAS BARITA	SIPSN	2021	Average	3	1.695	618.638	0.0986327	0.0168	0.586167	0.0271	0.2713	0.167182	0.028476	0.993554	0.0459345	0.459853	61.0216	10.3937	362.647	16.7661	167.847
SUMATERA UTARA	KAB. TAPANULI UTARA	ADIAN KOTING	SIPSN	2021	Average	3	1.711	624.516	0.0986327	0.0168	0.586167	0.0271	0.2713	0.168761	0.0287448	1.00293	0.0463681	0.464194	61.5976	10.4919	366.07	16.9244	169.431
SUMATERA UTARA	KAB. TAPANULI UTARA	SIPOHOLON	SIPSN	2021	Average	3	2.788	1017.74	0.0986327	0.0168	0.586167	0.0271	0.2713	0.274988	0.0468384	1.63423	0.0755548	0.756384	100.371	17.096	596.496	27.5775	276.08
SUMATERA UTARA	KAB. TAPANULI UTARA	PAHAE JULU	SIPSN	2021	Average	3	1.546	564.469	0.0986327	0.0168	0.586167	0.0271	0.2713	0.152486	0.0259728	0.906215	0.0418966	0.41943	55.6575	9.48007	330.768	15.2923	153.092
SUMATERA UTARA	KAB. TAPANULI UTARA	PAHAE JAE	SIPSN	2021	Average	3	1.357	495.155	0.0986327	0.0168	0.586167	0.0271	0.2713	0.133845	0.0227976	0.795429	0.0367747	0.368154	48.8533	8.32112	290.332	13.4228	134.376
SUMATERA UTARA	KAB. TAPANULI UTARA	SIMANGUMBAN	SIPSN	2021	Average	3	0.96	350.242	0.0986327	0.0168	0.586167	0.0271	0.2713	0.0946874	0.016128	0.562721	0.026016	0.260448	34.5609	5.88672	205.393	9.49584	95.0635
SUMATERA UTARA	KAB. TAPANULI UTARA	PURBA TUA	SIPSN	2021	Average	3	0.952	347.303	0.0986327	0.0168	0.586167	0.0271	0.2713	0.0938983	0.0159936	0.558031	0.0257992	0.258278	34.2729	5.83766	203.681	9.41671	94.2713
SUMATERA UTARA	KAB. TAPANULI UTARA	SIBORONG-BORONG	SIPSN	2021	Average	3	5.825	2126.19	0.0986327	0.0168	0.586167	0.0271	0.2713	0.574536	0.09786	3.41442	0.157858	1.58032	209.705	35.7189	1246.26	57.618	576.818
SUMATERA UTARA	KAB. TAPANULI UTARA	PAGARAN	SIPSN	2021	Average	3	2.185	797.351	0.0986327	0.0168	0.586167	0.0271	0.2713	0.215512	0.036708	1.28078	0.0592135	0.59279	78.6621	13.3984	467.483	21.6129	216.369
SUMATERA UTARA	KAB. TAPANULI UTARA	PARMONANGAN	SIPSN	2021	Average	3	1.68	613.046	0.0986327	0.0168	0.586167	0.0271	0.2713	0.165703	0.028224	0.984761	0.045528	0.455784	60.4816	10.3018	359.438	16.6177	166.361
SUMATERA UTARA	KAB. TAPANULI UTARA	SIPAHUTAR	SIPSN	2021	Average	3	3.28	1197.15	0.0986327	0.0168	0.586167	0.0271	0.2713	0.323515	0.055104	1.92263	0.088888	0.889864	118.083	20.113	701.759	32.4441	324.8
SUMATERA UTARA	KAB. TAPANULI UTARA	PANGARIBUAN	SIPSN	2021	Average	3	3.468	1265.65	0.0986327	0.0168	0.586167	0.0271	0.2713	0.342058	0.0582624	2.03283	0.0939828	0.940868	124.851	21.2658	741.982	34.3037	343.417
SUMATERA UTARA	KAB. TAPANULI UTARA	GAROGA	SIPSN	2021	Average	3	2.094	764.45	0.0986327	0.0168	0.586167	0.0271	0.2713	0.206537	0.0351792	1.22743	0.0567474	0.568102	75.386	12.8404	448.014	20.7128	207.357
SUMATERA UTARA	KAB. TAPANULI UTARA	MUARA	SIPSN	2021	Average	3	1.706	622.679	0.0986327	0.0168	0.586167	0.0271	0.2713	0.168267	0.0286608	1	0.0462326	0.462838	61.4176	10.4612	365.001	16.8749	168.936
SUMATERA UTARA	KAB. TAPANULI SELATAN	ANGKOLA BARAT	Average of Province	Filling Data	Worst	1	2.932	1070.36	0.1444	0.0014	0.4814	0.1855	0.1873	0.423381	0.0041048	1.41146	0.543886	0.549164	154.534	1.49825	515.185	198.518	200.445
SUMATERA UTARA	KAB. TAPANULI SELATAN	BATANG TORU	Average of Province	Filling Data	Worst	1	4.021	1467.75	0.1444	0.0014	0.4814	0.1855	0.1873	0.580632	0.0056294	1.93571	0.745895	0.753133	211.931	2.05473	706.534	272.252	274.894
SUMATERA UTARA	KAB. TAPANULI SELATAN	ANGKOLA TIMUR	Average of Province	Filling Data	Worst	1	2.599	948.674	0.1444	0.0014	0.4814	0.1855	0.1873	0.375296	0.0036386	1.25116	0.482115	0.486793	136.983	1.32809	456.673	175.972	177.679
SUMATERA UTARA	KAB. TAPANULI SELATAN	SIPIROK	Average of Province	Filling Data	Worst	1	3.982	1453.34	0.1444	0.0014	0.4814	0.1855	0.1873	0.575001	0.0055748	1.91693	0.738661	0.745829	209.875	2.0348	699.681	269.611	272.227
SUMATERA UTARA	KAB. TAPANULI SELATAN	SAIPAR DOLOK HOLE	Average of Province	Filling Data	Worst	1	1.653	603.167	0.1444	0.0014	0.4814	0.1855	0.1873	0.238693	0.0023142	0.795754	0.306632	0.309607	87.123	0.844683	290.45	111.92	113.007
SUMATERA UTARA	KAB. TAPANULI SELATAN	ANGKOLA SELATAN	Average of Province	Filling Data	Worst	1	3.701	1350.8	0.1444	0.0014	0.4814	0.1855	0.1873	0.534424	0.0051814	1.78166	0.686535	0.693197	195.065	1.89121	650.306	250.585	253.017
SUMATERA UTARA	KAB. TAPANULI SELATAN	BATANG ANGKOLA	Average of Province	Filling Data	Worst	1	2.463	899.117	0.1444	0.0014	0.4814	0.1855	0.1873	0.355657	0.0034482	1.18569	0.456887	0.46132	129.815	1.25859	432.776	166.764	168.382
SUMATERA UTARA	KAB. TAPANULI SELATAN	ARSE	Average of Province	Filling Data	Worst	1	1.008	367.754	0.1444	0.0014	0.4814	0.1855	0.1873	0.145555	0.0014112	0.485251	0.186984	0.188798	53.1276	0.515088	177.117	68.2492	68.9114
SUMATERA UTARA	KAB. TAPANULI SELATAN	MARANCAR	Average of Province	Filling Data	Worst	1	1.219	444.864	0.1444	0.0014	0.4814	0.1855	0.1873	0.176024	0.0017066	0.586827	0.226125	0.228319	64.2486	0.622909	214.192	82.5354	83.3363
SUMATERA UTARA	KAB. TAPANULI SELATAN	SAYUR MATINGGI	Average of Province	Filling Data	Worst	1	3.026	1104.45	0.1444	0.0014	0.4814	0.1855	0.1873	0.436954	0.0042364	1.45672	0.561323	0.56677	159.488	1.54629	531.701	204.883	206.871
SUMATERA UTARA	KAB. TAPANULI SELATAN	AEK BILAH	Average of Province	Filling Data	Worst	1	0.852	311.136	0.1444	0.0014	0.4814	0.1855	0.1873	0.123029	0.0011928	0.410153	0.158046	0.15958	44.9055	0.435372	149.706	57.6868	58.2466
SUMATERA UTARA	KAB. TAPANULI SELATAN	MUARA BATANG TORU	Average of Province	Filling Data	Worst	1	1.942	708.811	0.1444	0.0014	0.4814	0.1855	0.1873	0.280425	0.0027188	0.934879	0.360241	0.363737	102.355	0.992362	341.231	131.488	132.764
SUMATERA UTARA	KAB. TAPANULI SELATAN	TANO TOMBANGAN ANGKOLA	Average of Province	Filling Data	Worst	1	1.81	660.724	0.1444	0.0014	0.4814	0.1855	0.1873	0.261364	0.002534	0.871334	0.335755	0.339013	95.3979	0.92491	318.037	122.551	123.74
SUMATERA UTARA	KAB. TAPANULI SELATAN	ANGKOLA SANGKUNUR	Average of Province	Filling Data	Worst	1	2.597	947.98	0.1444	0.0014	0.4814	0.1855	0.1873	0.375007	0.0036358	1.2502	0.481743	0.486418	136.877	1.32707	456.321	175.836	177.543
SUMATERA UTARA	KAB. TAPANULI SELATAN	ANGKOLA MUARA TAIS	Average of Province	Filling Data	Worst	1	1.599	583.614	0.1444	0.0014	0.4814	0.1855	0.1873	0.230896	0.0022386	0.769759	0.296615	0.299493	84.2769	0.817089	280.962	108.264	109.315
SUMATERA UTARA	KAB. NIAS	HILIDUHO	SIPSN	2022	Good	4	0.753	274.665	0.136032	0.0016	0.291868	0.0518	0.5187	0.102432	0.0012048	0.219777	0.0390054	0.390581	37.3877	0.439752	80.2185	14.237	142.562
SUMATERA UTARA	KAB. NIAS	GIDO	SIPSN	2022	Good	4	1.807	659.491	0.136032	0.0016	0.291868	0.0518	0.5187	0.24581	0.0028912	0.527405	0.0936026	0.937291	89.7206	1.05529	192.503	34.1649	342.111
SUMATERA UTARA	KAB. NIAS	IDANOGAWO	SIPSN	2022	Good	4	2.057	750.629	0.136032	0.0016	0.291868	0.0518	0.5187	0.279818	0.0032912	0.600372	0.106553	1.06697	102.134	1.20129	219.136	38.8917	389.443
SUMATERA UTARA	KAB. NIAS	BAWOLATO	SIPSN	2022	Good	4	1.905	695.257	0.136032	0.0016	0.291868	0.0518	0.5187	0.259141	0.003048	0.556008	0.098679	0.988123	94.5865	1.11252	202.943	36.0178	360.665
SUMATERA UTARA	KAB. NIAS	HILISERANGKAI	SIPSN	2022	Good	4	0.953	348.004	0.136032	0.0016	0.291868	0.0518	0.5187	0.129639	0.0015248	0.27815	0.0493654	0.494321	47.3181	0.556552	101.525	18.0184	180.427
SUMATERA UTARA	KAB. NIAS	BOTOMUZOI	SIPSN	2022	Good	4	0.727	265.501	0.136032	0.0016	0.291868	0.0518	0.5187	0.0988953	0.0011632	0.212188	0.0376586	0.377095	36.0968	0.424568	77.4486	13.7454	137.64
SUMATERA UTARA	KAB. NIAS	ULUGAWO	SIPSN	2022	Good	4	0.758	276.692	0.136032	0.0016	0.291868	0.0518	0.5187	0.103112	0.0012128	0.221236	0.0392644	0.393175	37.636	0.442672	80.7511	14.3315	143.509
SUMATERA UTARA	KAB. NIAS	MA'U	SIPSN	2022	Good	4	0.78	284.773	0.136032	0.0016	0.291868	0.0518	0.5187	0.106105	0.001248	0.227657	0.040404	0.404586	38.7283	0.45552	83.0948	14.7475	147.674
SUMATERA UTARA	KAB. NIAS	SOMOLO-MOLO	SIPSN	2022	Good	4	0.491	179.111	0.136032	0.0016	0.291868	0.0518	0.5187	0.0667917	0.0007856	0.143307	0.0254338	0.254682	24.379	0.286744	52.3071	9.28334	92.9588
SUMATERA UTARA	KAB. NIAS	SOGAE'ADU	SIPSN	2022	Good	4	0.874	319.068	0.136032	0.0016	0.291868	0.0518	0.5187	0.118892	0.0013984	0.255093	0.0452732	0.453344	43.3956	0.510416	93.1088	16.5247	165.47
SUMATERA UTARA	KAB. LANGKAT	BAHOROK	SIPSN	2022	Good	4	3.412	1245.34	0.240479	0.0074	0.715121	0.0116	0.0254	0.820513	0.0252488	2.43999	0.0395792	0.0866648	299.487	9.21581	890.598	14.4464	31.6327
SUMATERA UTARA	KAB. LANGKAT	SALAPIAN	SIPSN	2022	Good	4	2.161	788.756	0.240479	0.0074	0.715121	0.0116	0.0254	0.519674	0.0159914	1.54538	0.0250676	0.0548894	189.681	5.83686	564.063	9.14967	20.0346
SUMATERA UTARA	KAB. LANGKAT	KUALA	SIPSN	2022	Good	4	3.31	1207.99	0.240479	0.0074	0.715121	0.0116	0.0254	0.795984	0.024494	2.36705	0.038396	0.084074	290.534	8.94031	863.974	14.0145	30.687
SUMATERA UTARA	KAB. LANGKAT	SEI BINGAI	SIPSN	2022	Good	4	4.184	1527.11	0.240479	0.0074	0.715121	0.0116	0.0254	1.00616	0.0309616	2.99207	0.0485344	0.106274	367.249	11.301	1092.1	17.7151	38.7899
SUMATERA UTARA	KAB. LANGKAT	BINJAI	SIPSN	2022	Good	4	3.88	1416.26	0.240479	0.0074	0.715121	0.0116	0.0254	0.933057	0.028712	2.77467	0.045008	0.098552	340.566	10.4799	1012.75	16.4279	35.9715
SUMATERA UTARA	KAB. LANGKAT	SELESAI	SIPSN	2022	Good	4	5.871	2142.92	0.240479	0.0074	0.715121	0.0116	0.0254	1.41185	0.0434454	4.19848	0.0681036	0.149123	515.325	15.8576	1532.44	24.8578	54.43
SUMATERA UTARA	KAB. LANGKAT	STABAT	SIPSN	2022	Good	4	7.363	2687.59	0.240479	0.0074	0.715121	0.0116	0.0254	1.77064	0.0544862	5.26544	0.0854108	0.18702	646.285	19.8875	1921.89	31.1749	68.2624
SUMATERA UTARA	KAB. LANGKAT	WAMPU	SIPSN	2022	Good	4	3.41	1244.5	0.240479	0.0074	0.715121	0.0116	0.0254	0.820032	0.025234	2.43856	0.039556	0.086614	299.312	9.21041	890.076	14.4379	31.6141
SUMATERA UTARA	KAB. LANGKAT	SECANGGANG	SIPSN	2022	Good	4	5.838	2130.79	0.240479	0.0074	0.715121	0.0116	0.0254	1.40391	0.0432012	4.17488	0.0677208	0.148285	512.429	15.7684	1523.83	24.7181	54.1241
SUMATERA UTARA	KAB. LANGKAT	HINAI	SIPSN	2022	Good	4	4.318	1576.15	0.240479	0.0074	0.715121	0.0116	0.0254	1.03839	0.0319532	3.08789	0.0500888	0.109677	379.011	11.6629	1127.08	18.2824	40.0322
SUMATERA UTARA	KAB. LANGKAT	TANJUNG PURA	SIPSN	2022	Good	4	5.585	2038.54	0.240479	0.0074	0.715121	0.0116	0.0254	1.34307	0.041329	3.99395	0.064786	0.141859	490.222	15.0851	1457.79	23.6469	51.7785
SUMATERA UTARA	KAB. LANGKAT	PADANG TUALANG	SIPSN	2022	Good	4	4.307	1572.15	0.240479	0.0074	0.715121	0.0116	0.0254	1.03574	0.0318718	3.08003	0.0499612	0.109398	378.046	11.6332	1124.21	18.2358	39.9302
SUMATERA UTARA	KAB. LANGKAT	GEBANG	SIPSN	2022	Good	4	3.827	1396.96	0.240479	0.0074	0.715121	0.0116	0.0254	0.920312	0.0283198	2.73677	0.0443932	0.0972058	335.914	10.3367	998.921	16.2035	35.4801
SUMATERA UTARA	KAB. LANGKAT	BABALAN	SIPSN	2022	Good	4	4.581	1671.9	0.240479	0.0074	0.715121	0.0116	0.0254	1.10163	0.0338994	3.27597	0.0531396	0.116357	402.096	12.3733	1195.73	19.396	42.4705
SUMATERA UTARA	KAB. LANGKAT	PANGKALAN SUSU	SIPSN	2022	Good	4	3.483	1271.47	0.240479	0.0074	0.715121	0.0116	0.0254	0.837587	0.0257742	2.49077	0.0404028	0.0884682	305.719	9.40758	909.13	14.747	32.2909
SUMATERA UTARA	KAB. LANGKAT	BESITANG	SIPSN	2022	Good	4	3.593	1311.29	0.240479	0.0074	0.715121	0.0116	0.0254	0.86404	0.0265882	2.56943	0.0416788	0.0912622	315.374	9.70469	937.842	15.2128	33.3107
SUMATERA UTARA	KAB. LANGKAT	SEI LEPAN	SIPSN	2022	Good	4	3.947	1440.67	0.240479	0.0074	0.715121	0.0116	0.0254	0.949169	0.0292078	2.82258	0.0457852	0.100254	346.447	10.6608	1030.24	16.7116	36.5926
SUMATERA UTARA	KAB. LANGKAT	BERANDAN BARAT	SIPSN	2022	Good	4	1.944	709.448	0.240479	0.0074	0.715121	0.0116	0.0254	0.46749	0.0143856	1.3902	0.0225504	0.0493776	170.634	5.25074	507.422	8.2309	18.0228
SUMATERA UTARA	KAB. LANGKAT	BATANG SERANGAN	SIPSN	2022	Good	4	2.875	1049.29	0.240479	0.0074	0.715121	0.0116	0.0254	0.691376	0.021275	2.05597	0.03335	0.073025	252.352	7.76538	750.431	12.1727	26.6541
SUMATERA UTARA	KAB. LANGKAT	SAWIT SEBERANG	SIPSN	2022	Good	4	2.09	762.792	0.240479	0.0074	0.715121	0.0116	0.0254	0.5026	0.015466	1.4946	0.024244	0.053086	183.449	5.64509	545.53	8.84906	19.3764
SUMATERA UTARA	KAB. LANGKAT	SIRAPIT	SIPSN	2022	Good	4	1.346	491.459	0.240479	0.0074	0.715121	0.0116	0.0254	0.323684	0.0099604	0.962553	0.0156136	0.0341884	118.145	3.63555	351.332	5.69896	12.4788
SUMATERA UTARA	KAB. LANGKAT	KUTAMBARU	SIPSN	2022	Good	4	1.107	404.014	0.240479	0.0074	0.715121	0.0116	0.0254	0.26621	0.0081918	0.791639	0.0128412	0.0281178	97.1666	2.99001	288.948	4.68704	10.263
SUMATERA UTARA	KAB. LANGKAT	PEMATANG JAYA	SIPSN	2022	Good	4	0.973	355.251	0.240479	0.0074	0.715121	0.0116	0.0254	0.233986	0.0072002	0.695813	0.0112868	0.0247142	85.4048	2.62807	253.972	4.11968	9.02068
SUMATERA UTARA	KAB. KARO	KABANJAHE	SIPSN	2021	Average	3	8.286	3024.24	0.323245	0.0031	0.500655	0.0698	0.1032	2.6784	0.0256866	4.14843	0.578363	0.855115	977.618	9.37561	1514.18	211.102	312.117
SUMATERA UTARA	KAB. KARO	BERASTAGI	SIPSN	2021	Average	3	5.47	1996.46	0.323245	0.0031	0.500655	0.0698	0.1032	1.76815	0.016957	2.73859	0.381806	0.564504	645.374	6.18931	999.584	139.359	206.044
SUMATERA UTARA	KAB. KARO	BARUSJAHE	SIPSN	2021	Average	3	2.766	1009.58	0.323245	0.0031	0.500655	0.0698	0.1032	0.894094	0.0085746	1.38481	0.193067	0.285451	326.344	3.12973	505.457	70.4694	104.19
SUMATERA UTARA	KAB. KARO	TIGAPANAH	SIPSN	2021	Average	3	4.151	1515.06	0.323245	0.0031	0.500655	0.0698	0.1032	1.34179	0.0128681	2.07822	0.28974	0.428383	489.753	4.69686	758.551	105.755	156.36
SUMATERA UTARA	KAB. KARO	MEREK	SIPSN	2021	Average	3	2.622	957.042	0.323245	0.0031	0.500655	0.0698	0.1032	0.847547	0.0081282	1.31272	0.183016	0.27059	309.355	2.96679	479.142	66.8007	98.7655
SUMATERA UTARA	KAB. KARO	MUNTE	SIPSN	2021	Average	3	2.613	953.613	0.323245	0.0031	0.500655	0.0698	0.1032	0.844638	0.0081003	1.30821	0.182387	0.269662	308.293	2.95661	477.498	66.5714	98.4265
SUMATERA UTARA	KAB. KARO	JUHAR	SIPSN	2021	Average	3	1.688	616.066	0.323245	0.0031	0.500655	0.0698	0.1032	0.545637	0.0052328	0.845106	0.117822	0.174202	199.157	1.90997	308.464	43.0052	63.5836
SUMATERA UTARA	KAB. KARO	TIGABINANGA	SIPSN	2021	Average	3	2.552	931.651	0.323245	0.0031	0.500655	0.0698	0.1032	0.82492	0.0079112	1.27767	0.17813	0.263366	301.096	2.88759	466.351	65.0173	96.1287
SUMATERA UTARA	KAB. KARO	LAUBALENG	SIPSN	2021	Average	3	2.256	823.476	0.323245	0.0031	0.500655	0.0698	0.1032	0.72924	0.0069936	1.12948	0.157469	0.232819	266.172	2.55266	412.26	57.4761	84.979
SUMATERA UTARA	KAB. KARO	MARDINGDING	SIPSN	2021	Average	3	2.186	797.719	0.323245	0.0031	0.500655	0.0698	0.1032	0.706613	0.0067766	1.09443	0.152583	0.225595	257.914	2.47346	399.468	55.6927	82.3422
SUMATERA UTARA	KAB. KARO	PAYUNG	SIPSN	2021	Average	3	1.284	468.744	0.323245	0.0031	0.500655	0.0698	0.1032	0.415046	0.0039804	0.642842	0.0896232	0.132509	151.492	1.45285	234.637	32.7125	48.3657
SUMATERA UTARA	KAB. KARO	SIMPANG EMPAT	SIPSN	2021	Average	3	2.59	945.49	0.323245	0.0031	0.500655	0.0698	0.1032	0.837203	0.008029	1.2967	0.180782	0.267288	305.579	2.93058	473.295	65.9854	97.5601
SUMATERA UTARA	KAB. KARO	KUTABULUH	SIPSN	2021	Average	3	1.4	511.157	0.323245	0.0031	0.500655	0.0698	0.1032	0.452542	0.00434	0.700918	0.09772	0.14448	165.178	1.5841	255.835	35.6678	52.7352
SUMATERA UTARA	KAB. KARO	DOLAT RAYAT	SIPSN	2021	Average	3	1.074	391.879	0.323245	0.0031	0.500655	0.0698	0.1032	0.347165	0.0033294	0.537704	0.0749652	0.110837	126.715	1.21523	196.262	27.3623	40.4554
SUMATERA UTARA	KAB. KARO	MERDEKA	SIPSN	2021	Average	3	1.746	637.375	0.323245	0.0031	0.500655	0.0698	0.1032	0.564385	0.0054126	0.874144	0.121871	0.180187	206.001	1.9756	319.063	44.4828	65.7683
SUMATERA UTARA	KAB. KARO	NAMAN TERAN	SIPSN	2021	Average	3	1.553	566.959	0.323245	0.0031	0.500655	0.0698	0.1032	0.501999	0.0048143	0.777518	0.108399	0.16027	183.23	1.75722	283.794	39.5658	58.4984
SUMATERA UTARA	KAB. KARO	TIGANDERKET	SIPSN	2021	Average	3	1.687	615.821	0.323245	0.0031	0.500655	0.0698	0.1032	0.545314	0.0052297	0.844606	0.117753	0.174098	199.039	1.90884	308.281	42.9797	63.5459
SUMATERA UTARA	KAB. DELI SERDANG	GUNUNG MERIAH	SIPSN	2022	Good	4	0.334	121.958	0.2448	0.0059	0.7019	0.024	0.0234	0.0817632	0.0019706	0.234435	0.008016	0.0078156	29.8436	0.719269	85.5686	2.92584	2.85269
SUMATERA UTARA	KAB. DELI SERDANG	TANJUNG MORAWA	SIPSN	2022	Good	4	25.512	9311.75	0.2448	0.0059	0.7019	0.024	0.0234	6.24534	0.150521	17.9069	0.612288	0.596981	2279.55	54.9401	6536.01	223.485	217.898
SUMATERA UTARA	KAB. DELI SERDANG	SIBOLANGIT	SIPSN	2022	Good	4	2.336	852.797	0.2448	0.0059	0.7019	0.024	0.0234	0.571853	0.0137824	1.63964	0.056064	0.0546624	208.726	5.03058	598.468	20.4634	19.9518
SUMATERA UTARA	KAB. DELI SERDANG	KUTALIMBARU	SIPSN	2022	Good	4	4.251	1551.54	0.2448	0.0059	0.7019	0.024	0.0234	1.04064	0.0250809	2.98378	0.102024	0.0994734	379.835	9.15453	1089.08	37.2388	36.3078
SUMATERA UTARA	KAB. DELI SERDANG	PANCUR BATU	SIPSN	2022	Good	4	10.606	3871.04	0.2448	0.0059	0.7019	0.024	0.0234	2.59635	0.0625754	7.44435	0.254544	0.24818	947.667	22.84	2717.19	92.9086	90.5858
SUMATERA UTARA	KAB. DELI SERDANG	NAMO RAMBE	SIPSN	2022	Good	4	4.485	1636.86	0.2448	0.0059	0.7019	0.024	0.0234	1.09793	0.0264615	3.14802	0.10764	0.104949	400.744	9.65845	1149.03	39.2886	38.3064
SUMATERA UTARA	KAB. DELI SERDANG	BIRU-BIRU	SIPSN	2022	Good	4	4.343	1585.34	0.2448	0.0059	0.7019	0.024	0.0234	1.06317	0.0256237	3.04835	0.104232	0.101626	388.056	9.35265	1112.65	38.0447	37.0936
SUMATERA UTARA	KAB. DELI SERDANG	STM HILIR	SIPSN	2022	Good	4	3.741	1365.52	0.2448	0.0059	0.7019	0.024	0.0234	0.915797	0.0220719	2.62581	0.089784	0.0875394	334.266	8.05624	958.42	32.7712	31.9519
SUMATERA UTARA	KAB. DELI SERDANG	BANGUN PURBA	SIPSN	2022	Good	4	2.733	997.39	0.2448	0.0059	0.7019	0.024	0.0234	0.669038	0.0161247	1.91829	0.065592	0.0639522	244.199	5.88552	700.177	23.9411	23.3426
SUMATERA UTARA	KAB. DELI SERDANG	GALANG	SIPSN	2022	Good	4	8.006	2922.25	0.2448	0.0059	0.7019	0.024	0.0234	1.95987	0.0472354	5.61941	0.192144	0.18734	715.352	17.2409	2051.09	70.1326	68.3792
SUMATERA UTARA	KAB. DELI SERDANG	STM HULU	SIPSN	2022	Good	4	1.609	587.196	0.2448	0.0059	0.7019	0.024	0.0234	0.393883	0.0094931	1.12936	0.038616	0.0376506	143.767	3.46498	412.215	14.0948	13.7425
SUMATERA UTARA	KAB. DELI SERDANG	PATUMBAK	SIPSN	2022	Good	4	11.132	4063.36	0.2448	0.0059	0.7019	0.024	0.0234	2.72511	0.0656788	7.81355	0.267168	0.260489	994.666	23.9728	2851.95	97.5163	95.0784
SUMATERA UTARA	KAB. DELI SERDANG	DELI TUA	SIPSN	2022	Good	4	6.61	2412.73	0.2448	0.0059	0.7019	0.024	0.0234	1.61813	0.038999	4.63956	0.15864	0.154674	590.617	14.2346	1693.44	57.9036	56.456
SUMATERA UTARA	KAB. DELI SERDANG	SUNGGAL	SIPSN	2022	Good	4	26.921	9826.26	0.2448	0.0059	0.7019	0.024	0.0234	6.59026	0.158834	18.8958	0.646104	0.629951	2405.45	57.9744	6896.99	235.828	229.932
SUMATERA UTARA	KAB. DELI SERDANG	HAMPARAN PERAK	SIPSN	2022	Good	4	18.88	6891.35	0.2448	0.0059	0.7019	0.024	0.0234	4.62182	0.111392	13.2519	0.45312	0.441792	1686.97	40.6581	4836.93	165.389	161.254
SUMATERA UTARA	KAB. DELI SERDANG	LABUHAN DELI	SIPSN	2022	Good	4	7.377	2692.54	0.2448	0.0059	0.7019	0.024	0.0234	1.80589	0.0435243	5.17792	0.177048	0.172622	659.15	15.8864	1889.94	64.6225	63.007
SUMATERA UTARA	KAB. DELI SERDANG	PERCUT SEI TUAN	SIPSN	2022	Good	4	44.397	16204.9	0.2448	0.0059	0.7019	0.024	0.0234	10.8684	0.261942	31.1623	1.06553	1.03889	3966.96	95.6089	11374.2	388.918	379.195
SUMATERA UTARA	KAB. DELI SERDANG	BATANG KUIS	SIPSN	2022	Good	4	7.685	2805.12	0.2448	0.0059	0.7019	0.024	0.0234	1.88129	0.0453415	5.3941	0.18444	0.179829	686.67	16.5496	1968.85	67.3206	65.6376
SUMATERA UTARA	KAB. DELI SERDANG	LUBUK PAKAM	SIPSN	2022	Good	4	10.016	3655.66	0.2448	0.0059	0.7019	0.024	0.0234	2.45192	0.0590944	7.03023	0.240384	0.234374	894.95	21.5695	2566.03	87.7402	85.5467
SUMATERA UTARA	KAB. DELI SERDANG	PAGAR MERBAU	SIPSN	2022	Good	4	4.544	1658.46	0.2448	0.0059	0.7019	0.024	0.0234	1.11237	0.0268096	3.18943	0.109056	0.10633	406.015	9.7855	1164.14	39.8054	38.8103
SUMATERA UTARA	KAB. DELI SERDANG	PANTAI LABU	SIPSN	2022	Good	4	5.694	2078.43	0.2448	0.0059	0.7019	0.024	0.0234	1.39389	0.0335946	3.99662	0.136656	0.13324	508.77	12.262	1458.77	49.8794	48.6325
SUMATERA UTARA	KAB. DELI SERDANG	BERINGIN	SIPSN	2022	Good	4	7.009	2558.27	0.2448	0.0059	0.7019	0.024	0.0234	1.7158	0.0413531	4.91962	0.168216	0.164011	626.268	15.0939	1795.66	61.3988	59.8639
SUMATERA UTARA	KAB. SIMALUNGUN	SIANTAR	SIPSN	2022	Good	4	7.8	2846.88	0.231453	0.0113	0.631647	0.0389	0.0867	1.80533	0.08814	4.92685	0.30342	0.67626	658.946	32.1711	1798.3	110.748	246.835
SUMATERA UTARA	KAB. SIMALUNGUN	GUNUNG MALELA	SIPSN	2022	Good	4	4.542	1657.83	0.231453	0.0113	0.631647	0.0389	0.0867	1.05126	0.0513246	2.86894	0.176684	0.393791	383.709	18.7335	1047.16	64.4896	143.734
SUMATERA UTARA	KAB. SIMALUNGUN	GUNUNG MALIGAS	SIPSN	2022	Good	4	3.798	1386.23	0.231453	0.0113	0.631647	0.0389	0.0867	0.879057	0.0429174	2.399	0.147742	0.329287	320.856	15.6649	875.634	53.9259	120.19
SUMATERA UTARA	KAB. SIMALUNGUN	PANEI	SIPSN	2022	Good	4	3.133	1143.47	0.231453	0.0113	0.631647	0.0389	0.0867	0.725141	0.0354029	1.97895	0.121874	0.271631	264.677	12.9221	722.317	44.4839	99.1454
SUMATERA UTARA	KAB. SIMALUNGUN	PANOMBEIAN PANEI	SIPSN	2022	Good	4	2.755	1005.4	0.231453	0.0113	0.631647	0.0389	0.0867	0.637652	0.0311315	1.74019	0.10717	0.238859	232.743	11.363	635.169	39.1169	87.1834
SUMATERA UTARA	KAB. SIMALUNGUN	JORLANG HATARAN	SIPSN	2022	Good	4	2.095	764.753	0.231453	0.0113	0.631647	0.0389	0.0867	0.484893	0.0236735	1.3233	0.0814955	0.181637	176.986	8.64083	483.005	29.7459	66.2973
SUMATERA UTARA	KAB. SIMALUNGUN	RAYA KAHEAN	SIPSN	2022	Good	4	2.342	855	0.231453	0.0113	0.631647	0.0389	0.0867	0.542062	0.0264646	1.47932	0.0911038	0.203051	197.853	9.65958	539.951	33.2529	74.1138
SUMATERA UTARA	KAB. SIMALUNGUN	BOSAR MALIGAS	SIPSN	2022	Good	4	4.631	1690.42	0.231453	0.0113	0.631647	0.0389	0.0867	1.07186	0.0523303	2.92516	0.180146	0.401508	391.228	19.1006	1067.68	65.7533	146.55
SUMATERA UTARA	KAB. SIMALUNGUN	SIDAMANIK	SIPSN	2022	Good	4	3.37	1230.09	0.231453	0.0113	0.631647	0.0389	0.0867	0.779996	0.038081	2.12865	0.131093	0.292179	284.698	13.8996	776.958	47.8489	106.645
SUMATERA UTARA	KAB. SIMALUNGUN	PAMATANG SIDAMANIK	SIPSN	2022	Good	4	2.209	806.254	0.231453	0.0113	0.631647	0.0389	0.0867	0.511279	0.0249617	1.39531	0.0859301	0.19152	186.617	9.11102	509.288	31.3645	69.9049
SUMATERA UTARA	KAB. SIMALUNGUN	TANAH JAWA	SIPSN	2022	Good	4	6.147	2243.55	0.231453	0.0113	0.631647	0.0389	0.0867	1.42274	0.0694611	3.88274	0.239118	0.532945	519.3	25.3533	1417.2	87.2782	194.525
SUMATERA UTARA	KAB. SIMALUNGUN	HATONDUHAN	SIPSN	2022	Good	4	2.955	1078.69	0.231453	0.0113	0.631647	0.0389	0.0867	0.683943	0.0333915	1.86652	0.11495	0.256198	249.639	12.1879	681.279	41.9566	93.5125
SUMATERA UTARA	KAB. SIMALUNGUN	DOLOK PANRIBUAN	SIPSN	2022	Good	4	2.562	935.075	0.231453	0.0113	0.631647	0.0389	0.0867	0.592982	0.0289506	1.61828	0.0996618	0.222125	216.438	10.567	590.672	36.3766	81.0758
SUMATERA UTARA	KAB. SIMALUNGUN	PURBA	SIPSN	2022	Good	4	3.116	1137.3	0.231453	0.0113	0.631647	0.0389	0.0867	0.721207	0.0352108	1.96821	0.121212	0.270157	263.24	12.8519	718.398	44.2425	98.6074
SUMATERA UTARA	KAB. SIMALUNGUN	HARANGGAOL HORISAN	SIPSN	2022	Good	4	0.766	279.528	0.231453	0.0113	0.631647	0.0389	0.0867	0.177293	0.0086558	0.483842	0.0297974	0.0664122	64.7119	3.15937	176.602	10.8761	24.2405
SUMATERA UTARA	KAB. SIMALUNGUN	GIRSANG SIPANGAN BOLON	SIPSN	2022	Good	4	1.955	713.579	0.231453	0.0113	0.631647	0.0389	0.0867	0.45249	0.0220915	1.23487	0.0760495	0.169498	165.159	8.0634	450.728	27.7581	61.867
SUMATERA UTARA	KAB. SIMALUNGUN	DOLOK BATU NANGGAR	SIPSN	2022	Good	4	4.973	1815.05	0.231453	0.0113	0.631647	0.0389	0.0867	1.15101	0.0561949	3.14118	0.19345	0.431159	420.12	20.5111	1146.53	70.6091	157.373
SUMATERA UTARA	KAB. SIMALUNGUN	HUTA BAYU RAJA	SIPSN	2022	Good	4	3.949	1441.45	0.231453	0.0113	0.631647	0.0389	0.0867	0.914007	0.0446237	2.49438	0.153616	0.342378	333.612	16.2877	910.447	56.0699	124.968
SUMATERA UTARA	KAB. SIMALUNGUN	JAWA MARAJA BAH JAMBI	SIPSN	2022	Good	4	2.584	943.167	0.231453	0.0113	0.631647	0.0389	0.0867	0.598074	0.0291992	1.63218	0.100518	0.224033	218.297	10.6577	595.744	36.6889	81.772
SUMATERA UTARA	KAB. SIMALUNGUN	DOLOK PARDAMEAN	SIPSN	2022	Good	4	1.732	632.041	0.231453	0.0113	0.631647	0.0389	0.0867	0.400876	0.0195716	1.09401	0.0673748	0.150164	146.32	7.14363	399.315	24.5918	54.81
SUMATERA UTARA	KAB. SIMALUNGUN	PEMATANG BANDAR	SIPSN	2022	Good	4	4.354	1589.16	0.231453	0.0113	0.631647	0.0389	0.0867	1.00775	0.0492002	2.75019	0.169371	0.377492	367.827	17.9581	1003.82	61.8203	137.785
SUMATERA UTARA	KAB. SIMALUNGUN	BANDAR HULUAN	SIPSN	2022	Good	4	3.23	1178.92	0.231453	0.0113	0.631647	0.0389	0.0867	0.747592	0.036499	2.04022	0.125647	0.280041	272.871	13.3221	744.681	45.8612	102.215
SUMATERA UTARA	KAB. SIMALUNGUN	BANDAR	SIPSN	2022	Good	4	8.926	3257.89	0.231453	0.0113	0.631647	0.0389	0.0867	2.06595	0.100864	5.63808	0.347221	0.773884	754.071	36.8153	2057.9	126.736	282.468
SUMATERA UTARA	KAB. SIMALUNGUN	BANDAR MASILAM	SIPSN	2022	Good	4	3.349	1222.39	0.231453	0.0113	0.631647	0.0389	0.0867	0.775135	0.0378437	2.11539	0.130276	0.290358	282.924	13.813	772.116	47.5508	105.981
SUMATERA UTARA	KAB. SIMALUNGUN	SILIMAKUTA	SIPSN	2022	Good	4	1.936	706.489	0.231453	0.0113	0.631647	0.0389	0.0867	0.448092	0.0218768	1.22287	0.0753104	0.167851	163.554	7.98503	446.347	27.4883	61.2657
SUMATERA UTARA	KAB. SIMALUNGUN	DOLOK SILOU	SIPSN	2022	Good	4	1.95	711.845	0.231453	0.0113	0.631647	0.0389	0.0867	0.451333	0.022035	1.23171	0.075855	0.169065	164.736	8.04277	449.575	27.6871	61.7087
SUMATERA UTARA	KAB. SIMALUNGUN	SILOU KAHEAN	SIPSN	2022	Good	4	2.233	814.963	0.231453	0.0113	0.631647	0.0389	0.0867	0.516834	0.0252329	1.41047	0.0868637	0.193601	188.644	9.21001	514.821	31.7053	70.6644
SUMATERA UTARA	KAB. SIMALUNGUN	TAPIAN DOLOK	SIPSN	2022	Good	4	4.97	1814.08	0.231453	0.0113	0.631647	0.0389	0.0867	1.15032	0.056161	3.13929	0.193333	0.430899	419.867	20.4988	1145.84	70.5665	157.278
SUMATERA UTARA	KAB. SIMALUNGUN	RAYA	SIPSN	2022	Good	4	3.462	1263.81	0.231453	0.0113	0.631647	0.0389	0.0867	0.801289	0.0391206	2.18676	0.134672	0.300155	292.471	14.279	798.168	49.1552	109.557
SUMATERA UTARA	KAB. SIMALUNGUN	UJUNG PADANG	SIPSN	2022	Good	4	4.915	1794.04	0.231453	0.0113	0.631647	0.0389	0.0867	1.13759	0.0555395	3.10455	0.191194	0.426131	415.22	20.2719	1133.16	69.7856	155.538
SUMATERA UTARA	KAB. SIMALUNGUN	PAMATANG SILIMA HUTA	SIPSN	2022	Good	4	1.499	547.227	0.231453	0.0113	0.631647	0.0389	0.0867	0.346948	0.0169387	0.946839	0.0583111	0.129963	126.636	6.18263	345.596	21.2836	47.4366
SUMATERA UTARA	KAB. SIMALUNGUN	DOLOG MASAGAL	SIPSN	2022	Good	4	1.504	549.115	0.231453	0.0113	0.631647	0.0389	0.0867	0.348105	0.0169952	0.949998	0.0585056	0.130397	127.058	6.20325	346.749	21.3545	47.5948
SUMATERA UTARA	KAB. ASAHAN	MERANTI	SIPSN	2022	Good	4	3.727	1360.44	0.111531	0.0182	0.806669	0.0301	0.0335	0.415677	0.0678314	3.00645	0.112183	0.124855	151.722	24.7585	1097.36	40.9467	45.5719
SUMATERA UTARA	KAB. ASAHAN	AIR JOMAN	SIPSN	2022	Good	4	9.058	3306.25	0.111531	0.0182	0.806669	0.0301	0.0335	1.01025	0.164856	7.3068	0.272646	0.303443	368.742	60.1723	2666.98	99.5157	110.757
SUMATERA UTARA	KAB. ASAHAN	TANJUNG BALAI	SIPSN	2022	Good	4	6.601	2409.29	0.111531	0.0182	0.806669	0.0301	0.0335	0.736218	0.120138	5.32482	0.19869	0.221134	268.72	43.8504	1943.56	72.5219	80.7137
SUMATERA UTARA	KAB. ASAHAN	SEI KEPAYANG	SIPSN	2022	Good	4	3.027	1104.8	0.111531	0.0182	0.806669	0.0301	0.0335	0.337605	0.0550914	2.44179	0.0911127	0.101405	123.226	20.1084	891.252	33.2561	37.0126
SUMATERA UTARA	KAB. ASAHAN	SIMPANG EMPAT	SIPSN	2022	Good	4	7.447	2718.23	0.111531	0.0182	0.806669	0.0301	0.0335	0.830574	0.135535	6.00726	0.224155	0.249475	303.159	49.4704	2192.65	81.8165	91.0582
SUMATERA UTARA	KAB. ASAHAN	AIR BATU	SIPSN	2022	Good	4	7.305	2666.44	0.111531	0.0182	0.806669	0.0301	0.0335	0.814736	0.132951	5.89271	0.21988	0.244718	297.379	48.5271	2150.84	80.2564	89.3219
SUMATERA UTARA	KAB. ASAHAN	PULAU RAKYAT	SIPSN	2022	Good	4	5.57	2032.98	0.111531	0.0182	0.806669	0.0301	0.0335	0.621229	0.101374	4.49314	0.167657	0.186595	226.749	37.0015	1640	61.1948	68.1072
SUMATERA UTARA	KAB. ASAHAN	BANDAR PULAU	SIPSN	2022	Good	4	3.767	1375	0.111531	0.0182	0.806669	0.0301	0.0335	0.420138	0.0685594	3.03872	0.113387	0.126195	153.351	25.0242	1109.13	41.3861	46.061
SUMATERA UTARA	KAB. ASAHAN	BUNTU PANE	SIPSN	2022	Good	4	3.95	1441.92	0.111531	0.0182	0.806669	0.0301	0.0335	0.440549	0.07189	3.18634	0.118895	0.132325	160.8	26.2399	1163.01	43.3967	48.2986
SUMATERA UTARA	KAB. ASAHAN	BANDAR PASIR MANDOGE	SIPSN	2022	Good	4	5.421	1978.6	0.111531	0.0182	0.806669	0.0301	0.0335	0.604611	0.0986622	4.37295	0.163172	0.181604	220.683	36.0117	1596.13	59.5578	66.2853
SUMATERA UTARA	KAB. ASAHAN	AEK KUASAN	SIPSN	2022	Good	4	4.116	1502.37	0.111531	0.0182	0.806669	0.0301	0.0335	0.459063	0.0749112	3.32025	0.123892	0.137886	167.558	27.3426	1211.89	45.2204	50.3284
SUMATERA UTARA	KAB. ASAHAN	KOTA KISARAN BARAT	SIPSN	2022	Good	4	9.37	3419.96	0.111531	0.0182	0.806669	0.0301	0.0335	1.04505	0.170534	7.55849	0.282037	0.313895	381.443	62.2449	2758.85	102.944	114.572
SUMATERA UTARA	KAB. ASAHAN	KOTA KISARAN TIMUR	SIPSN	2022	Good	4	13.075	4772.24	0.111531	0.0182	0.806669	0.0301	0.0335	1.45827	0.237965	10.5472	0.393557	0.438013	532.269	86.8572	3849.73	143.648	159.875
SUMATERA UTARA	KAB. ASAHAN	AEK SONGSONGAN	SIPSN	2022	Good	4	2.901	1058.97	0.111531	0.0182	0.806669	0.0301	0.0335	0.323552	0.0527982	2.34015	0.0873201	0.0971835	118.097	19.2713	854.153	31.8718	35.472
SUMATERA UTARA	KAB. ASAHAN	RAHUNING	SIPSN	2022	Good	4	3.152	1150.58	0.111531	0.0182	0.806669	0.0301	0.0335	0.351547	0.0573664	2.54262	0.0948752	0.105592	128.315	20.9387	928.056	34.6294	38.5411
SUMATERA UTARA	KAB. ASAHAN	SEI DADAP	SIPSN	2022	Good	4	5.851	2135.77	0.111531	0.0182	0.806669	0.0301	0.0335	0.65257	0.106488	4.71982	0.176115	0.196009	238.188	38.8682	1722.73	64.282	71.5431
SUMATERA UTARA	KAB. ASAHAN	SEI KEPAYANG BARAT	SIPSN	2022	Good	4	2.331	850.856	0.111531	0.0182	0.806669	0.0301	0.0335	0.25998	0.0424242	1.88034	0.0701631	0.0780885	94.8925	15.4848	686.326	25.6095	28.5023
SUMATERA UTARA	KAB. ASAHAN	SEI KEPAYANG TIMUR	SIPSN	2022	Good	4	1.556	568.062	0.111531	0.0182	0.806669	0.0301	0.0335	0.173543	0.0283192	1.25518	0.0468356	0.052126	63.3431	10.3365	458.139	17.095	19.026
SUMATERA UTARA	KAB. ASAHAN	TINGGI RAJA	SIPSN	2022	Good	4	3.21	1171.49	0.111531	0.0182	0.806669	0.0301	0.0335	0.358016	0.058422	2.58941	0.096621	0.107535	130.676	21.324	945.133	35.2667	39.2503
SUMATERA UTARA	KAB. ASAHAN	SETIA JANJI	SIPSN	2022	Good	4	2.014	734.96	0.111531	0.0182	0.806669	0.0301	0.0335	0.224624	0.0366548	1.62463	0.0606214	0.067469	81.9878	13.379	592.99	22.1268	24.6262
SUMATERA UTARA	KAB. ASAHAN	SILAU LAUT	SIPSN	2022	Good	4	3.975	1450.91	0.111531	0.0182	0.806669	0.0301	0.0335	0.443337	0.072345	3.20651	0.119647	0.133163	161.818	26.4059	1170.38	43.6713	48.6043
SUMATERA UTARA	KAB. ASAHAN	RAWANG PANCA ARGA	SIPSN	2022	Good	4	3.19	1164.41	0.111531	0.0182	0.806669	0.0301	0.0335	0.355785	0.058058	2.57327	0.096019	0.106865	129.861	21.1912	939.245	35.0469	39.0057
SUMATERA UTARA	KAB. ASAHAN	PULO BANDRING	SIPSN	2022	Good	4	5.423	1979.22	0.111531	0.0182	0.806669	0.0301	0.0335	0.604834	0.0986986	4.37456	0.163232	0.181671	220.765	36.025	1596.72	59.5798	66.3097
SUMATERA UTARA	KAB. ASAHAN	TELUK DALAM	SIPSN	2022	Good	4	2.953	1077.7	0.111531	0.0182	0.806669	0.0301	0.0335	0.329352	0.0537446	2.38209	0.0888853	0.0989255	120.213	19.6168	869.464	32.4431	36.1078
SUMATERA UTARA	KAB. ASAHAN	AEK LEDONG	SIPSN	2022	Good	4	2.949	1076.24	0.111531	0.0182	0.806669	0.0301	0.0335	0.328906	0.0536718	2.37887	0.0887649	0.0987915	120.051	19.5902	868.286	32.3992	36.0589
SUMATERA UTARA	KAB. LABUHANBATU	RANTAU UTARA	Average of Province	Filling Data	Worst	1	10.879	3970.88	0.177	0.0025	0.7708	0.0232	0.0265	1.92558	0.0271975	8.38553	0.252393	0.288293	702.838	9.92709	3060.72	92.1234	105.227
SUMATERA UTARA	KAB. LABUHANBATU	RANTAU SELATAN	Average of Province	Filling Data	Worst	1	8.453	3085.47	0.177	0.0025	0.7708	0.0232	0.0265	1.49618	0.0211325	6.51557	0.19611	0.224004	546.106	7.71336	2378.18	71.58	81.7616
SUMATERA UTARA	KAB. LABUHANBATU	BILAH BARAT	Average of Province	Filling Data	Worst	1	4.567	1666.83	0.177	0.0025	0.7708	0.0232	0.0265	0.808359	0.0114175	3.52024	0.105954	0.121025	295.051	4.16739	1284.89	38.6734	44.1743
SUMATERA UTARA	KAB. LABUHANBATU	BILAH HILIR	Average of Province	Filling Data	Worst	1	6.942	2533.78	0.177	0.0025	0.7708	0.0232	0.0265	1.22873	0.017355	5.35089	0.161054	0.183963	448.488	6.33458	1953.08	58.7849	67.1465
SUMATERA UTARA	KAB. LABUHANBATU	BILAH HULU	Average of Province	Filling Data	Worst	1	7.341	2679.31	0.177	0.0025	0.7708	0.0232	0.0265	1.29936	0.0183525	5.65844	0.170311	0.194537	474.265	6.69866	2065.33	62.1636	71.0058
SUMATERA UTARA	KAB. LABUHANBATU	PANGKATAN	Average of Province	Filling Data	Worst	1	4.335	1582.41	0.177	0.0025	0.7708	0.0232	0.0265	0.767295	0.0108375	3.34142	0.100572	0.114877	280.063	3.95569	1219.62	36.7088	41.9303
SUMATERA UTARA	KAB. LABUHANBATU	PANAI TENGAH	Average of Province	Filling Data	Worst	1	4.698	1714.84	0.177	0.0025	0.7708	0.0232	0.0265	0.831546	0.011745	3.62122	0.108994	0.124497	303.514	4.28693	1321.74	39.7827	45.4414
SUMATERA UTARA	KAB. LABUHANBATU	PANAI HILIR	Average of Province	Filling Data	Worst	1	4.94	1803.26	0.177	0.0025	0.7708	0.0232	0.0265	0.87438	0.01235	3.80775	0.114608	0.13091	319.149	4.50775	1389.83	41.8319	47.7822
SUMATERA UTARA	KAB. LABUHANBATU	PANAI HULU	Average of Province	Filling Data	Worst	1	4.444	1621.97	0.177	0.0025	0.7708	0.0232	0.0265	0.786588	0.01111	3.42544	0.103101	0.117766	287.105	4.05515	1250.28	37.6318	42.9846
SUMATERA UTARA	KAB. DAIRI	SIDIKALANG	SIPSN	2020	Bad	2	6.243	2278.55	0.2513	0.008	0.7036	0.0039	0.0332	1.56887	0.049944	4.39257	0.0243477	0.207268	572.636	18.2296	1603.29	8.88691	75.6527
SUMATERA UTARA	KAB. DAIRI	SUMBUL	SIPSN	2020	Bad	2	5.326	1943.82	0.2513	0.008	0.7036	0.0039	0.0332	1.33842	0.042608	3.74737	0.0207714	0.176823	488.525	15.5519	1367.79	7.58156	64.5405
SUMATERA UTARA	KAB. DAIRI	TIGALINGGA	SIPSN	2020	Bad	2	2.816	1027.82	0.2513	0.008	0.7036	0.0039	0.0332	0.707661	0.022528	1.98134	0.0109824	0.0934912	258.296	8.22272	723.188	4.00858	34.1243
SUMATERA UTARA	KAB. DAIRI	SIEMPAT NEMPU	SIPSN	2020	Bad	2	2.383	869.788	0.2513	0.008	0.7036	0.0039	0.0332	0.598848	0.019064	1.67668	0.0092937	0.0791156	218.579	6.95836	611.988	3.3922	28.8772
SUMATERA UTARA	KAB. DAIRI	SILIMA PUNGGA PUNGGA	SIPSN	2020	Bad	2	1.735	633.306	0.2513	0.008	0.7036	0.0039	0.0332	0.436005	0.01388	1.22075	0.0067665	0.057602	159.142	5.0662	445.572	2.46977	21.0247
SUMATERA UTARA	KAB. DAIRI	TANAH PINEM	SIPSN	2020	Bad	2	2.674	975.98	0.2513	0.008	0.7036	0.0039	0.0332	0.671976	0.021392	1.88143	0.0104286	0.0887768	245.271	7.80808	686.721	3.80644	32.4035
SUMATERA UTARA	KAB. DAIRI	SIEMPAT NEMPU HULU	SIPSN	2020	Bad	2	2.367	863.794	0.2513	0.008	0.7036	0.0039	0.0332	0.594827	0.018936	1.66542	0.0092313	0.0785844	217.112	6.91164	607.879	3.36942	28.6833
SUMATERA UTARA	KAB. DAIRI	SIEMPAT NEMPU HILIR	SIPSN	2020	Bad	2	1.41	514.714	0.2513	0.008	0.7036	0.0039	0.0332	0.354333	0.01128	0.992076	0.005499	0.046812	129.332	4.1172	362.108	2.00714	17.0864
SUMATERA UTARA	KAB. DAIRI	PEGAGAN HILIR	SIPSN	2020	Bad	2	2.065	753.883	0.2513	0.008	0.7036	0.0039	0.0332	0.518934	0.01652	1.45293	0.0080535	0.068558	189.411	6.0298	530.321	2.93953	25.0237
SUMATERA UTARA	KAB. DAIRI	PARBULUAN	SIPSN	2020	Bad	2	3.06	1116.93	0.2513	0.008	0.7036	0.0039	0.0332	0.768978	0.02448	2.15302	0.011934	0.101592	280.677	8.9352	785.851	4.35591	37.0811
SUMATERA UTARA	KAB. DAIRI	LAE PARIRA	SIPSN	2020	Bad	2	1.734	633.058	0.2513	0.008	0.7036	0.0039	0.0332	0.435754	0.013872	1.22004	0.0067626	0.0575688	159.05	5.06328	445.315	2.46835	21.0126
SUMATERA UTARA	KAB. DAIRI	GUNUNG SITEMBER	SIPSN	2020	Bad	2	1.247	455.107	0.2513	0.008	0.7036	0.0039	0.0332	0.313371	0.009976	0.877389	0.0048633	0.0414004	114.38	3.64124	320.247	1.7751	15.1111
SUMATERA UTARA	KAB. DAIRI	BERAMPU	SIPSN	2020	Bad	2	1.049	382.894	0.2513	0.008	0.7036	0.0039	0.0332	0.263614	0.008392	0.738076	0.0040911	0.0348268	96.219	3.06308	269.398	1.49325	12.7118
SUMATERA UTARA	KAB. DAIRI	SILAHISABUNGAN	SIPSN	2020	Bad	2	0.667	243.509	0.2513	0.008	0.7036	0.0039	0.0332	0.167617	0.005336	0.469301	0.0026013	0.0221444	61.1802	1.94764	171.295	0.949475	8.08271
SUMATERA UTARA	KAB. DAIRI	SITINJO	SIPSN	2020	Bad	2	1.639	598.212	0.2513	0.008	0.7036	0.0039	0.0332	0.411881	0.013112	1.1532	0.0063921	0.0544148	150.336	4.78588	420.918	2.33312	19.8614
SUMATERA UTARA	KAB. TOBA	BALIGE	SIPSN	2022	Good	4	4.023	1468.22	0.420541	0.0065	0.490359	0.0079	0.0747	1.69183	0.0261495	1.97272	0.0317817	0.300518	617.52	9.54457	720.041	11.6003	109.689
SUMATERA UTARA	KAB. TOBA	LAGUBOTI	SIPSN	2022	Good	4	2.041	745.079	0.420541	0.0065	0.490359	0.0079	0.0747	0.858323	0.0132665	1.00082	0.0161239	0.152463	313.288	4.84227	365.301	5.88522	55.6489
SUMATERA UTARA	KAB. TOBA	SILAEN	SIPSN	2022	Good	4	1.32	481.773	0.420541	0.0065	0.490359	0.0079	0.0747	0.555114	0.00858	0.647274	0.010428	0.098604	202.616	3.1317	236.255	3.80622	35.9905
SUMATERA UTARA	KAB. TOBA	HABINSARAN	SIPSN	2022	Good	4	1.648	601.375	0.420541	0.0065	0.490359	0.0079	0.0747	0.693051	0.010712	0.808112	0.0130192	0.123106	252.964	3.90988	294.961	4.75201	44.9335
SUMATERA UTARA	KAB. TOBA	PINTU POHAN MERANTI	SIPSN	2022	Good	4	0.708	258.291	0.420541	0.0065	0.490359	0.0079	0.0747	0.297743	0.004602	0.347174	0.0055932	0.0528876	108.676	1.67973	126.719	2.04152	19.304
SUMATERA UTARA	KAB. TOBA	BORBOR	SIPSN	2022	Good	4	0.764	278.834	0.420541	0.0065	0.490359	0.0079	0.0747	0.321293	0.004966	0.374635	0.0060356	0.0570708	117.272	1.81259	136.742	2.20299	20.8308
SUMATERA UTARA	KAB. TOBA	PORSEA	SIPSN	2022	Good	4	1.377	502.704	0.420541	0.0065	0.490359	0.0079	0.0747	0.579084	0.0089505	0.675225	0.0108783	0.102862	211.366	3.26693	246.457	3.97058	37.5446
SUMATERA UTARA	KAB. TOBA	AJIBATA	SIPSN	2022	Good	4	0.897	327.264	0.420541	0.0065	0.490359	0.0079	0.0747	0.377225	0.0058305	0.439852	0.0070863	0.0670059	137.687	2.12813	160.546	2.5865	24.4572
SUMATERA UTARA	KAB. TOBA	LUMBAN JULU	SIPSN	2022	Good	4	0.954	348.066	0.420541	0.0065	0.490359	0.0079	0.0747	0.401196	0.006201	0.467803	0.0075366	0.0712638	146.436	2.26336	170.748	2.75086	26.0113
SUMATERA UTARA	KAB. TOBA	ULUAN	SIPSN	2022	Good	4	0.903	329.496	0.420541	0.0065	0.490359	0.0079	0.0747	0.379748	0.0058695	0.442795	0.0071337	0.0674541	138.608	2.14237	161.62	2.6038	24.6207
SUMATERA UTARA	KAB. TOBA	SIGUMPAR	SIPSN	2022	Good	4	0.793	289.381	0.420541	0.0065	0.490359	0.0079	0.0747	0.333489	0.0051545	0.388855	0.0062647	0.0592371	121.723	1.88139	141.932	2.28662	21.6215
SUMATERA UTARA	KAB. TOBA	SIANTAR NARUMONDA	SIPSN	2022	Good	4	0.682	248.845	0.420541	0.0065	0.490359	0.0079	0.0747	0.286809	0.004433	0.334425	0.0053878	0.0509454	104.685	1.61805	122.065	1.96655	18.5951
SUMATERA UTARA	KAB. TOBA	NASSAU	SIPSN	2022	Good	4	0.823	300.38	0.420541	0.0065	0.490359	0.0079	0.0747	0.346105	0.0053495	0.403566	0.0065017	0.0614781	126.328	1.95257	147.302	2.37312	22.4395
SUMATERA UTARA	KAB. TOBA	TAMPAHAN	SIPSN	2022	Good	4	0.466	169.908	0.420541	0.0065	0.490359	0.0079	0.0747	0.195972	0.003029	0.228508	0.0036814	0.0348102	71.5297	1.10559	83.4052	1.34371	12.7057
SUMATERA UTARA	KAB. TOBA	BONATUA LUNASI	SIPSN	2022	Good	4	0.543	198.312	0.420541	0.0065	0.490359	0.0079	0.0747	0.228354	0.0035295	0.266265	0.0042897	0.0405621	83.349	1.28827	97.1868	1.56574	14.8052
SUMATERA UTARA	KAB. TOBA	PARMAKSIAN	SIPSN	2022	Good	4	1.035	377.796	0.420541	0.0065	0.490359	0.0079	0.0747	0.435259	0.0067275	0.507522	0.0081765	0.0773145	158.87	2.45554	185.246	2.98442	28.2198
SUMATERA UTARA	KAB. MANDAILING NATAL	PANYABUNGAN	Average of Province	Filling Data	Worst	1	10.845	3958.55	0.1831	0.0079	0.5069	0.2065	0.0956	1.98572	0.0856755	5.49733	2.23949	1.03678	724.788	31.2716	2006.53	817.415	378.425
SUMATERA UTARA	KAB. MANDAILING NATAL	PANYABUNGAN UTARA	Average of Province	Filling Data	Worst	1	2.742	1000.72	0.1831	0.0079	0.5069	0.2065	0.0956	0.50206	0.0216618	1.38992	0.566223	0.262135	183.252	7.90656	507.321	206.671	95.6793
SUMATERA UTARA	KAB. MANDAILING NATAL	PANYABUNGAN TIMUR	Average of Province	Filling Data	Worst	1	1.617	590.227	0.1831	0.0079	0.5069	0.2065	0.0956	0.296073	0.0127743	0.819657	0.33391	0.154585	108.067	4.66262	299.175	121.877	56.4236
SUMATERA UTARA	KAB. MANDAILING NATAL	PANYABUNGAN SELATAN	Average of Province	Filling Data	Worst	1	1.216	443.68	0.1831	0.0079	0.5069	0.2065	0.0956	0.22265	0.0096064	0.61639	0.251104	0.11625	81.2671	3.50634	224.982	91.653	42.4311
SUMATERA UTARA	KAB. MANDAILING NATAL	PANYABUNGAN BARAT	Average of Province	Filling Data	Worst	1	1.279	466.948	0.1831	0.0079	0.5069	0.2065	0.0956	0.234185	0.0101041	0.648325	0.264113	0.122272	85.4775	3.688	236.639	96.4014	44.6294
SUMATERA UTARA	KAB. MANDAILING NATAL	SIABU	Average of Province	Filling Data	Worst	1	6.216	2268.98	0.1831	0.0079	0.5069	0.2065	0.0956	1.13815	0.0491064	3.15089	1.2836	0.59425	415.425	17.9238	1150.07	468.515	216.901
SUMATERA UTARA	KAB. MANDAILING NATAL	BUKIT MALINTANG	Average of Province	Filling Data	Worst	1	1.488	543.038	0.1831	0.0079	0.5069	0.2065	0.0956	0.272453	0.0117552	0.754267	0.307272	0.142253	99.4453	4.29065	275.308	112.154	51.9223
SUMATERA UTARA	KAB. MANDAILING NATAL	KOTANOPAN	Average of Province	Filling Data	Worst	1	3.237	1181.52	0.1831	0.0079	0.5069	0.2065	0.0956	0.592695	0.0255723	1.64084	0.66844	0.309457	216.334	9.33389	598.905	243.981	112.952
SUMATERA UTARA	KAB. MANDAILING NATAL	LEMBAH SORIK MARAPI	Average of Province	Filling Data	Worst	1	1.278	466.54	0.1831	0.0079	0.5069	0.2065	0.0956	0.234002	0.0100962	0.647818	0.263907	0.122177	85.4107	3.68511	236.454	96.3261	44.5945
SUMATERA UTARA	KAB. MANDAILING NATAL	TAMBANGAN	Average of Province	Filling Data	Worst	1	1.296	473.194	0.1831	0.0079	0.5069	0.2065	0.0956	0.237298	0.0102384	0.656942	0.267624	0.123898	86.6136	3.73702	239.784	97.6828	45.2226
SUMATERA UTARA	KAB. MANDAILING NATAL	ULU PUNGKUT	Average of Province	Filling Data	Worst	1	0.552	201.614	0.1831	0.0079	0.5069	0.2065	0.0956	0.101071	0.0043608	0.279809	0.113988	0.0527712	36.891	1.59169	102.13	41.6056	19.2615
SUMATERA UTARA	KAB. MANDAILING NATAL	MUARA SIPONGI	Average of Province	Filling Data	Worst	1	1.469	536.017	0.1831	0.0079	0.5069	0.2065	0.0956	0.268974	0.0116051	0.744636	0.303349	0.140436	98.1755	4.23586	271.792	110.722	51.2593
SUMATERA UTARA	KAB. MANDAILING NATAL	BATANG NATAL	Average of Province	Filling Data	Worst	1	2.858	1043.13	0.1831	0.0079	0.5069	0.2065	0.0956	0.5233	0.0225782	1.44872	0.590177	0.273225	191.004	8.24104	528.783	215.415	99.7271
SUMATERA UTARA	KAB. MANDAILING NATAL	LINGGA BAYU	Average of Province	Filling Data	Worst	1	3.005	1096.89	0.1831	0.0079	0.5069	0.2065	0.0956	0.550215	0.0237395	1.52323	0.620532	0.287278	200.829	8.66492	555.981	226.494	104.856
SUMATERA UTARA	KAB. MANDAILING NATAL	BATAHAN	Average of Province	Filling Data	Worst	1	2.456	896.423	0.1831	0.0079	0.5069	0.2065	0.0956	0.449694	0.0194024	1.24495	0.507164	0.234794	164.138	7.08188	454.405	185.115	85.6997
SUMATERA UTARA	KAB. MANDAILING NATAL	NATAL	Average of Province	Filling Data	Worst	1	3.788	1382.8	0.1831	0.0079	0.5069	0.2065	0.0956	0.693583	0.0299252	1.92014	0.782222	0.362133	253.158	10.9227	700.85	285.511	132.178
SUMATERA UTARA	KAB. MANDAILING NATAL	MUARA BATANG GADIS	Average of Province	Filling Data	Worst	1	2.525	921.569	0.1831	0.0079	0.5069	0.2065	0.0956	0.462328	0.0199475	1.27992	0.521412	0.24139	168.75	7.28084	467.172	190.316	88.1073
SUMATERA UTARA	KAB. MANDAILING NATAL	RANTO BAEK	Average of Province	Filling Data	Worst	1	1.644	600.187	0.1831	0.0079	0.5069	0.2065	0.0956	0.301016	0.0129876	0.833344	0.339486	0.157166	109.871	4.74047	304.17	123.912	57.3657
SUMATERA UTARA	KAB. MANDAILING NATAL	HUTA BARGOT	Average of Province	Filling Data	Worst	1	1.058	386.123	0.1831	0.0079	0.5069	0.2065	0.0956	0.19372	0.0083582	0.5363	0.218477	0.101145	70.7077	3.05074	195.75	79.7441	36.9179
SUMATERA UTARA	KAB. MANDAILING NATAL	PUNCAK SORIK MARAPI	Average of Province	Filling Data	Worst	1	1.13	412.575	0.1831	0.0079	0.5069	0.2065	0.0956	0.206903	0.008927	0.572797	0.233345	0.108028	75.5196	3.25835	209.071	85.1709	39.4302
SUMATERA UTARA	KAB. MANDAILING NATAL	PAKANTAN	Average of Province	Filling Data	Worst	1	0.267	97.276	0.1831	0.0079	0.5069	0.2065	0.0956	0.0488877	0.0021093	0.135342	0.0551355	0.0255252	17.844	0.769895	49.3999	20.1245	9.3167
SUMATERA UTARA	KAB. MANDAILING NATAL	SINUNUKAN	Average of Province	Filling Data	Worst	1	2.397	874.747	0.1831	0.0079	0.5069	0.2065	0.0956	0.438891	0.0189363	1.21504	0.49498	0.229153	160.195	6.91175	443.489	180.668	83.6409
SUMATERA UTARA	KAB. MANDAILING NATAL	NAGA JUANG	Average of Province	Filling Data	Worst	1	0.588	214.635	0.1831	0.0079	0.5069	0.2065	0.0956	0.107663	0.0046452	0.298057	0.121422	0.0562128	39.2969	1.6955	108.791	44.319	20.5177
SUMATERA UTARA	KAB. NIAS SELATAN	LOLOMATUA	Average of Province	Filling Data	Worst	1	0.511	186.678	0.0979	0.149	0.1697	0.1092	0.4742	0.0500269	0.076139	0.0867167	0.0558012	0.242316	18.2598	27.7907	31.6516	20.3674	88.4454
SUMATERA UTARA	KAB. NIAS SELATAN	GOMO	Average of Province	Filling Data	Worst	1	0.513	187.095	0.0979	0.149	0.1697	0.1092	0.4742	0.0502227	0.076437	0.0870561	0.0560196	0.243265	18.3313	27.8995	31.7755	20.4472	88.7916
SUMATERA UTARA	KAB. NIAS SELATAN	LAHUSA	Average of Province	Filling Data	Worst	1	1.003	366.05	0.0979	0.149	0.1697	0.1092	0.4742	0.0981937	0.149447	0.170209	0.109528	0.475623	35.8407	54.5482	62.1263	39.9776	173.602
SUMATERA UTARA	KAB. NIAS SELATAN	HIBALA	Average of Province	Filling Data	Worst	1	0.388	141.484	0.0979	0.149	0.1697	0.1092	0.4742	0.0379852	0.057812	0.0658436	0.0423696	0.18399	13.8646	21.1014	24.0329	15.4649	67.1562
SUMATERA UTARA	KAB. NIAS SELATAN	PULAU-PULAU BATU	Average of Province	Filling Data	Worst	1	0.474	172.881	0.0979	0.149	0.1697	0.1092	0.4742	0.0464046	0.070626	0.0804378	0.0517608	0.224771	16.9377	25.7785	29.3598	18.8927	82.0413
SUMATERA UTARA	KAB. NIAS SELATAN	TELUK DALAM	Average of Province	Filling Data	Worst	1	1.255	457.966	0.0979	0.149	0.1697	0.1092	0.4742	0.122864	0.186995	0.212974	0.137046	0.595121	44.8455	68.2532	77.7353	50.0218	217.219
SUMATERA UTARA	KAB. NIAS SELATAN	AMANDRAYA	Average of Province	Filling Data	Worst	1	0.69	251.867	0.0979	0.149	0.1697	0.1092	0.4742	0.067551	0.10281	0.117093	0.075348	0.327198	24.6561	37.5256	42.7389	27.502	119.427
SUMATERA UTARA	KAB. NIAS SELATAN	LOLOWAU	Average of Province	Filling Data	Worst	1	0.48	175.38	0.0979	0.149	0.1697	0.1092	0.4742	0.046992	0.07152	0.081456	0.052416	0.227616	17.1521	26.1048	29.7314	19.1318	83.0798
SUMATERA UTARA	KAB. NIAS SELATAN	SUSUA	Average of Province	Filling Data	Worst	1	0.804	293.468	0.0979	0.149	0.1697	0.1092	0.4742	0.0787116	0.119796	0.136439	0.0877968	0.381257	28.7297	43.7255	49.8002	32.0458	139.159
SUMATERA UTARA	KAB. NIAS SELATAN	MANIAMOLO	Average of Province	Filling Data	Worst	1	0.674	245.966	0.0979	0.149	0.1697	0.1092	0.4742	0.0659846	0.100426	0.114378	0.0736008	0.319611	24.0844	36.6555	41.7479	26.8643	116.658
SUMATERA UTARA	KAB. NIAS SELATAN	HILIMEGAI	Average of Province	Filling Data	Worst	1	0.34	123.972	0.0979	0.149	0.1697	0.1092	0.4742	0.033286	0.05066	0.057698	0.037128	0.161228	12.1494	18.4909	21.0598	13.5517	58.8482
SUMATERA UTARA	KAB. NIAS SELATAN	TOMA	Average of Province	Filling Data	Worst	1	0.667	243.397	0.0979	0.149	0.1697	0.1092	0.4742	0.0652993	0.099383	0.11319	0.0728364	0.316291	23.8342	36.2748	41.3143	26.5853	115.446
SUMATERA UTARA	KAB. NIAS SELATAN	MAZINO	Average of Province	Filling Data	Worst	1	0.401	146.5	0.0979	0.149	0.1697	0.1092	0.4742	0.0392579	0.059749	0.0680497	0.0437892	0.190154	14.3291	21.8084	24.8381	15.9831	69.4063
SUMATERA UTARA	KAB. NIAS SELATAN	UMBUNASI	Average of Province	Filling Data	Worst	1	0.362	132.303	0.0979	0.149	0.1697	0.1092	0.4742	0.0354398	0.053938	0.0614314	0.0395304	0.17166	12.9355	19.6874	22.4225	14.4286	62.656
SUMATERA UTARA	KAB. NIAS SELATAN	ARAMO	Average of Province	Filling Data	Worst	1	0.504	183.849	0.0979	0.149	0.1697	0.1092	0.4742	0.0493416	0.075096	0.0855288	0.0550368	0.238997	18.0097	27.41	31.218	20.0884	87.2338
SUMATERA UTARA	KAB. NIAS SELATAN	PULAU-PULAU BATU TIMUR	Average of Province	Filling Data	Worst	1	0.157	57.205	0.0979	0.149	0.1697	0.1092	0.4742	0.0153703	0.023393	0.0266429	0.0171444	0.0744494	5.61016	8.53844	9.72466	6.25771	27.174
SUMATERA UTARA	KAB. NIAS SELATAN	MAZO	Average of Province	Filling Data	Worst	1	0.612	223.507	0.0979	0.149	0.1697	0.1092	0.4742	0.0599148	0.091188	0.103856	0.0668304	0.29021	21.8689	33.2836	37.9076	24.3931	105.927
SUMATERA UTARA	KAB. NIAS SELATAN	FANAYAMA	Average of Province	Filling Data	Worst	1	0.876	319.884	0.0979	0.149	0.1697	0.1092	0.4742	0.0857604	0.130524	0.148657	0.0956592	0.415399	31.3025	47.6413	54.2599	34.9156	151.621
SUMATERA UTARA	KAB. NIAS SELATAN	ULUNOYO	Average of Province	Filling Data	Worst	1	0.59	215.506	0.0979	0.149	0.1697	0.1092	0.4742	0.057761	0.08791	0.100123	0.064428	0.279778	21.0828	32.0871	36.5449	23.5162	102.119
SUMATERA UTARA	KAB. NIAS SELATAN	HURUNA	Average of Province	Filling Data	Worst	1	0.613	223.681	0.0979	0.149	0.1697	0.1092	0.4742	0.0600127	0.091337	0.104026	0.0669396	0.290685	21.9046	33.338	37.9695	24.433	106.1
SUMATERA UTARA	KAB. NIAS SELATAN	O'O'U	Average of Province	Filling Data	Worst	1	0.432	157.608	0.0979	0.149	0.1697	0.1092	0.4742	0.0422928	0.064368	0.0733104	0.0471744	0.204854	15.4369	23.4943	26.7583	17.2187	74.7719
SUMATERA UTARA	KAB. NIAS SELATAN	ONOHAZUMBA	Average of Province	Filling Data	Worst	1	0.335	122.237	0.0979	0.149	0.1697	0.1092	0.4742	0.0327965	0.049915	0.0568495	0.036582	0.158857	11.9707	18.219	20.7501	13.3524	57.9828
SUMATERA UTARA	KAB. NIAS SELATAN	HILISALAWA'AHE	Average of Province	Filling Data	Worst	1	0.278	101.566	0.0979	0.149	0.1697	0.1092	0.4742	0.0272162	0.041422	0.0471766	0.0303576	0.131828	9.93391	15.119	17.2195	11.0805	48.1171
SUMATERA UTARA	KAB. NIAS SELATAN	ULUSUSUA	Average of Province	Filling Data	Worst	1	0.526	192.093	0.0979	0.149	0.1697	0.1092	0.4742	0.0514954	0.078374	0.0892622	0.0574392	0.249429	18.7958	28.6065	32.5807	20.9653	91.0417
SUMATERA UTARA	KAB. NIAS SELATAN	SIDUA'ORI	Average of Province	Filling Data	Worst	1	0.55	200.789	0.0979	0.149	0.1697	0.1092	0.4742	0.053845	0.08195	0.093335	0.06006	0.26081	19.6534	29.9118	34.0673	21.9219	95.1957
SUMATERA UTARA	KAB. NIAS SELATAN	SOMAMBAWA	Average of Province	Filling Data	Worst	1	0.693	252.769	0.0979	0.149	0.1697	0.1092	0.4742	0.0678447	0.103257	0.117602	0.0756756	0.328621	24.7633	37.6888	42.9248	27.6216	119.947
SUMATERA UTARA	KAB. NIAS SELATAN	BORONADU	Average of Province	Filling Data	Worst	1	0.365	133.292	0.0979	0.149	0.1697	0.1092	0.4742	0.0357335	0.054385	0.0619405	0.039858	0.173083	13.0427	19.8505	22.6083	14.5482	63.1753
SUMATERA UTARA	KAB. NIAS SELATAN	SIMUK	Average of Province	Filling Data	Worst	1	0.099	36.221	0.0979	0.149	0.1697	0.1092	0.4742	0.0096921	0.014751	0.0168003	0.0108108	0.0469458	3.53762	5.38412	6.13211	3.94594	17.1352
SUMATERA UTARA	KAB. NIAS SELATAN	PULAU-PULAU BATU BARAT	Average of Province	Filling Data	Worst	1	0.116	42.313	0.0979	0.149	0.1697	0.1092	0.4742	0.0113564	0.017284	0.0196852	0.0126672	0.0550072	4.14509	6.30866	7.1851	4.62353	20.0776
SUMATERA UTARA	KAB. NIAS SELATAN	PULAU-PULAU BATU UTARA	Average of Province	Filling Data	Worst	1	0.188	68.746	0.0979	0.149	0.1697	0.1092	0.4742	0.0184052	0.028012	0.0319036	0.0205296	0.0891496	6.7179	10.2244	11.6448	7.4933	32.5396
SUMATERA UTARA	KAB. NIAS SELATAN	TANAH MASA	Average of Province	Filling Data	Worst	1	0.236	86.102	0.0979	0.149	0.1697	0.1092	0.4742	0.0231044	0.035164	0.0400492	0.0257712	0.111911	8.43311	12.8349	14.618	9.40649	40.8476
SUMATERA UTARA	KAB. NIAS SELATAN	LUAHAGUNDRE MANIAMOLO	Average of Province	Filling Data	Worst	1	0.509	185.967	0.0979	0.149	0.1697	0.1092	0.4742	0.0498311	0.075841	0.0863773	0.0555828	0.241368	18.1884	27.682	31.5277	20.2877	88.0992
SUMATERA UTARA	KAB. NIAS SELATAN	ONOLALU	Average of Province	Filling Data	Worst	1	0.411	150.127	0.0979	0.149	0.1697	0.1092	0.4742	0.0402369	0.061239	0.0697467	0.0448812	0.194896	14.6865	22.3522	25.4575	16.3816	71.1371
SUMATERA UTARA	KAB. NIAS SELATAN	ULU IDANOTAE	Average of Province	Filling Data	Worst	1	0.354	129.075	0.0979	0.149	0.1697	0.1092	0.4742	0.0346566	0.052746	0.0600738	0.0386568	0.167867	12.6497	19.2523	21.9269	14.1097	61.2714
SUMATERA UTARA	KAB. NIAS SELATAN	IDANOTAE	Average of Province	Filling Data	Worst	1	0.497	181.437	0.0979	0.149	0.1697	0.1092	0.4742	0.0486563	0.074053	0.0843409	0.0542724	0.235677	17.7595	27.0293	30.7844	19.8094	86.0223
SUMATERA UTARA	KAB. PAKPAK BHARAT	SITELU TALI URANG JEHE	Average of Province	Filling Data	Worst	1	1.359	496.094	0.1605	0.001	0.6346	0.0194	0.1845	0.21812	0.001359	0.862421	0.0263646	0.250736	79.6136	0.496035	314.784	9.62308	91.5185
SUMATERA UTARA	KAB. PAKPAK BHARAT	KERAJAAN	Average of Province	Filling Data	Worst	1	1.226	447.477	0.1605	0.001	0.6346	0.0194	0.1845	0.196773	0.001226	0.77802	0.0237844	0.226197	71.8221	0.44749	283.977	8.68131	82.5619
SUMATERA UTARA	KAB. PAKPAK BHARAT	SALAK	Average of Province	Filling Data	Worst	1	1.173	428.005	0.1605	0.001	0.6346	0.0194	0.1845	0.188267	0.001173	0.744386	0.0227562	0.216419	68.7173	0.428145	271.701	8.30601	78.9928
SUMATERA UTARA	KAB. PAKPAK BHARAT	SITELU TALI URANG JULU	Average of Province	Filling Data	Worst	1	0.514	187.775	0.1605	0.001	0.6346	0.0194	0.1845	0.082497	0.000514	0.326184	0.0099716	0.094833	30.1114	0.18761	119.057	3.63963	34.614
SUMATERA UTARA	KAB. PAKPAK BHARAT	PERGETTENG GETTENG SENGKUT	Average of Province	Filling Data	Worst	1	0.569	207.696	0.1605	0.001	0.6346	0.0194	0.1845	0.0913245	0.000569	0.361087	0.0110386	0.10498	33.3334	0.207685	131.797	4.02909	38.3179
SUMATERA UTARA	KAB. PAKPAK BHARAT	PAGINDAR	Average of Province	Filling Data	Worst	1	0.176	64.333	0.1605	0.001	0.6346	0.0194	0.1845	0.028248	0.000176	0.11169	0.0034144	0.032472	10.3105	0.06424	40.7667	1.24626	11.8523
SUMATERA UTARA	KAB. PAKPAK BHARAT	TINADA	Average of Province	Filling Data	Worst	1	0.58	211.655	0.1605	0.001	0.6346	0.0194	0.1845	0.09309	0.00058	0.368068	0.011252	0.10701	33.9779	0.2117	134.345	4.10698	39.0587
SUMATERA UTARA	KAB. PAKPAK BHARAT	SIEMPAT RUBE	Average of Province	Filling Data	Worst	1	0.649	236.76	0.1605	0.001	0.6346	0.0194	0.1845	0.104165	0.000649	0.411855	0.0125906	0.11974	38.02	0.236885	150.327	4.59557	43.7053
SUMATERA UTARA	KAB. HUMBANG HASUNDUTAN	PARLILITAN	SIPSN	2022	Good	4	1.148	419.142	0.1479	0.0051	0.7631	0.0365	0.0474	0.169789	0.0058548	0.876039	0.041902	0.0544152	61.9731	2.137	319.754	15.2942	19.8615
SUMATERA UTARA	KAB. HUMBANG HASUNDUTAN	POLLUNG	SIPSN	2022	Good	4	1.239	452.16	0.1479	0.0051	0.7631	0.0365	0.0474	0.183248	0.0063189	0.945481	0.0452235	0.0587286	66.8856	2.3064	345.101	16.5066	21.4359
SUMATERA UTARA	KAB. HUMBANG HASUNDUTAN	BAKTIRAJA	SIPSN	2022	Good	4	0.426	155.384	0.1479	0.0051	0.7631	0.0365	0.0474	0.0630054	0.0021726	0.325081	0.015549	0.0201924	22.997	0.792999	118.654	5.67538	7.37023
SUMATERA UTARA	KAB. HUMBANG HASUNDUTAN	PARANGINAN	SIPSN	2022	Good	4	0.852	310.848	0.1479	0.0051	0.7631	0.0365	0.0474	0.126011	0.0043452	0.650161	0.031098	0.0403848	45.9939	1.586	237.309	11.3508	14.7405
SUMATERA UTARA	KAB. HUMBANG HASUNDUTAN	LINTONG NIHUTA	SIPSN	2022	Good	4	1.912	698.02	0.1479	0.0051	0.7631	0.0365	0.0474	0.282785	0.0097512	1.45905	0.069788	0.0906288	103.216	3.55919	532.552	25.4726	33.0795
SUMATERA UTARA	KAB. HUMBANG HASUNDUTAN	DOLOK SANGGUL	SIPSN	2022	Good	4	2.905	1060.21	0.1479	0.0051	0.7631	0.0365	0.0474	0.429649	0.0148155	2.21681	0.106032	0.137697	156.822	5.40766	809.134	38.7019	50.2594
SUMATERA UTARA	KAB. HUMBANG HASUNDUTAN	SIJAMAPOLANG	SIPSN	2022	Good	4	0.36	131.486	0.1479	0.0051	0.7631	0.0365	0.0474	0.053244	0.001836	0.274716	0.01314	0.017064	19.4341	0.67014	100.271	4.7961	6.22836
SUMATERA UTARA	KAB. HUMBANG HASUNDUTAN	ONAN GANJANG	SIPSN	2022	Good	4	0.632	230.781	0.1479	0.0051	0.7631	0.0365	0.0474	0.0934728	0.0032232	0.482279	0.023068	0.0299568	34.1176	1.17647	176.032	8.41982	10.9342
SUMATERA UTARA	KAB. HUMBANG HASUNDUTAN	PAKKAT	SIPSN	2022	Good	4	1.354	494.257	0.1479	0.0051	0.7631	0.0365	0.0474	0.200257	0.0069054	1.03324	0.049421	0.0641796	73.0937	2.52047	377.132	18.0387	23.4256
SUMATERA UTARA	KAB. HUMBANG HASUNDUTAN	TARABINTANG	SIPSN	2022	Good	4	0.463	169.094	0.1479	0.0051	0.7631	0.0365	0.0474	0.0684777	0.0023613	0.353315	0.0168995	0.0219462	24.9944	0.861875	128.96	6.16832	8.01036
SUMATERA UTARA	KAB. SAMOSIR	SIMANINDO	SIPSN	2020	Bad	2	2.719	992.311	0.1301	0.0214	0.7871	0.0119	0.0495	0.353742	0.0581866	2.14012	0.0323561	0.134591	129.116	21.2381	781.146	11.81	49.1255
SUMATERA UTARA	KAB. SAMOSIR	ONAN RUNGGU	SIPSN	2020	Bad	2	1.257	458.702	0.1301	0.0214	0.7871	0.0119	0.0495	0.163536	0.0268998	0.989385	0.0149583	0.0622215	59.6905	9.81843	361.125	5.45978	22.7108
SUMATERA UTARA	KAB. SAMOSIR	NAINGGOLAN	SIPSN	2020	Bad	2	1.473	537.772	0.1301	0.0214	0.7871	0.0119	0.0495	0.191637	0.0315222	1.1594	0.0175287	0.0729135	69.9476	11.5056	423.18	6.39798	26.6134
SUMATERA UTARA	KAB. SAMOSIR	PALIPI	SIPSN	2020	Bad	2	2.136	779.472	0.1301	0.0214	0.7871	0.0119	0.0495	0.277894	0.0457104	1.68125	0.0254184	0.105732	101.431	16.6843	613.655	9.27772	38.5922
SUMATERA UTARA	KAB. SAMOSIR	HARIAN	SIPSN	2020	Bad	2	1.14	416.167	0.1301	0.0214	0.7871	0.0119	0.0495	0.148314	0.024396	0.897294	0.013566	0.05643	54.1346	8.90454	327.512	4.95159	20.5969
SUMATERA UTARA	KAB. SAMOSIR	SIANJAR MULA MULA	SIPSN	2020	Bad	2	1.165	425.352	0.1301	0.0214	0.7871	0.0119	0.0495	0.151566	0.024931	0.916971	0.0138635	0.0576675	55.3218	9.09982	334.695	5.06018	21.0486
SUMATERA UTARA	KAB. SAMOSIR	RONGGUR NIHUTA	SIPSN	2020	Bad	2	1.126	410.861	0.1301	0.0214	0.7871	0.0119	0.0495	0.146493	0.0240964	0.886275	0.0133994	0.055737	53.4698	8.79519	323.49	4.89078	20.344
SUMATERA UTARA	KAB. SAMOSIR	PANGURURAN	SIPSN	2020	Bad	2	4.053	1479.46	0.1301	0.0214	0.7871	0.0119	0.0495	0.527295	0.0867342	3.19012	0.0482307	0.200624	192.463	31.658	1164.39	17.6042	73.2276
SUMATERA UTARA	KAB. SAMOSIR	SITIO-TIO	SIPSN	2020	Bad	2	0.943	344.119	0.1301	0.0214	0.7871	0.0119	0.0495	0.122684	0.0201802	0.742235	0.0112217	0.0466785	44.7798	7.36577	270.916	4.09592	17.0377
SUMATERA UTARA	KAB. SERDANG BEDAGAI	PANTAI CERMIN	Average of Province	Filling Data	Worst	1	4.5	1642.52	0.0608413	0.0121	0.883659	0.0251	0.0183	0.273786	0.05445	3.97646	0.11295	0.08235	99.9318	19.8742	1451.41	41.2267	30.0578
SUMATERA UTARA	KAB. SERDANG BEDAGAI	PERBAUNGAN	Average of Province	Filling Data	Worst	1	10.172	3712.72	0.0608413	0.0121	0.883659	0.0251	0.0183	0.618878	0.123081	8.98858	0.255317	0.186148	225.89	44.9246	3280.83	93.1908	67.9439
SUMATERA UTARA	KAB. SERDANG BEDAGAI	TELUK MENGKUDU	Average of Province	Filling Data	Worst	1	4.423	1614.45	0.0608413	0.0121	0.883659	0.0251	0.0183	0.269101	0.0535183	3.90842	0.111017	0.0809409	98.2219	19.5342	1426.57	40.5213	29.5434
SUMATERA UTARA	KAB. SERDANG BEDAGAI	SEI RAMPAH	Average of Province	Filling Data	Worst	1	6.501	2373.04	0.0608413	0.0121	0.883659	0.0251	0.0183	0.395529	0.0786621	5.74467	0.163175	0.118968	144.368	28.7117	2096.8	59.5589	43.4234
SUMATERA UTARA	KAB. SERDANG BEDAGAI	TANJUNG BERINGIN	Average of Province	Filling Data	Worst	1	3.88	1416.33	0.0608413	0.0121	0.883659	0.0251	0.0183	0.236064	0.046948	3.4286	0.097388	0.071004	86.1634	17.136	1251.44	35.5466	25.9165
SUMATERA UTARA	KAB. SERDANG BEDAGAI	BANDAR KHALIPAH	Average of Province	Filling Data	Worst	1	2.333	851.569	0.0608413	0.0121	0.883659	0.0251	0.0183	0.141943	0.0282293	2.06158	0.0585583	0.0426939	51.8091	10.3037	752.475	21.3738	15.5833
SUMATERA UTARA	KAB. SERDANG BEDAGAI	DOLOK MERAWAN	Average of Province	Filling Data	Worst	1	1.671	609.8	0.0608413	0.0121	0.883659	0.0251	0.0183	0.101666	0.0202191	1.47659	0.0419421	0.0305793	37.108	7.37997	538.957	15.3089	11.1614
SUMATERA UTARA	KAB. SERDANG BEDAGAI	SIPISPIS	Average of Province	Filling Data	Worst	1	3.067	1119.29	0.0608413	0.0121	0.883659	0.0251	0.0183	0.1866	0.0371107	2.71018	0.0769817	0.0561261	68.1091	13.5454	989.216	28.0983	20.486
SUMATERA UTARA	KAB. SERDANG BEDAGAI	DOLOK MASIHUL	Average of Province	Filling Data	Worst	1	4.819	1758.8	0.0608413	0.0121	0.883659	0.0251	0.0183	0.293194	0.0583099	4.25835	0.120957	0.0881877	107.016	21.2831	1554.3	44.1493	32.1885
SUMATERA UTARA	KAB. SERDANG BEDAGAI	KOTARIH	Average of Province	Filling Data	Worst	1	0.839	306.381	0.0608413	0.0121	0.883659	0.0251	0.0183	0.0510459	0.0101519	0.74139	0.0210589	0.0153537	18.6317	3.70544	270.607	7.6865	5.6041
SUMATERA UTARA	KAB. SERDANG BEDAGAI	SILINDA	Average of Province	Filling Data	Worst	1	0.872	318.131	0.0608413	0.0121	0.883659	0.0251	0.0183	0.0530536	0.0105512	0.77055	0.0218872	0.0159576	19.3646	3.85119	281.251	7.98883	5.82452
SUMATERA UTARA	KAB. SERDANG BEDAGAI	SERBA JADI	Average of Province	Filling Data	Worst	1	1.923	702.065	0.0608413	0.0121	0.883659	0.0251	0.0183	0.116998	0.0232683	1.69928	0.0482673	0.0351909	42.7042	8.49293	620.236	17.6176	12.8447
SUMATERA UTARA	KAB. SERDANG BEDAGAI	TEBING TINGGI	Average of Province	Filling Data	Worst	1	3.641	1328.96	0.0608413	0.0121	0.883659	0.0251	0.0183	0.221523	0.0440561	3.2174	0.0913891	0.0666303	80.856	16.0805	1174.35	33.357	24.3201
SUMATERA UTARA	KAB. SERDANG BEDAGAI	PEGAJAHAN	Average of Province	Filling Data	Worst	1	2.791	1018.75	0.0608413	0.0121	0.883659	0.0251	0.0183	0.169808	0.0337711	2.46629	0.0700541	0.0510753	61.9799	12.3265	900.196	25.5697	18.6425
SUMATERA UTARA	KAB. SERDANG BEDAGAI	SEI BAMBAN	Average of Province	Filling Data	Worst	1	4.138	1510.37	0.0608413	0.0121	0.883659	0.0251	0.0183	0.251761	0.0500698	3.65658	0.103864	0.0757254	91.8929	18.2755	1334.65	37.9103	27.6398
SUMATERA UTARA	KAB. SERDANG BEDAGAI	TEBING SYAHBANDAR	Average of Province	Filling Data	Worst	1	2.96	1080.56	0.0608413	0.0121	0.883659	0.0251	0.0183	0.18009	0.035816	2.61563	0.074296	0.054168	65.7329	13.0728	954.705	27.118	19.7713
SUMATERA UTARA	KAB. SERDANG BEDAGAI	BINTANG BAYU	Average of Province	Filling Data	Worst	1	1.133	413.423	0.0608413	0.0121	0.883659	0.0251	0.0183	0.0689332	0.0137093	1.00119	0.0284383	0.0207339	25.1606	5.00389	365.433	10.38	7.56787
SUMATERA UTARA	KAB. BATU BARA	MEDANG DERAS	Average of Province	Filling Data	Worst	1	6.547	2389.48	0.0831	0.0092	0.8132	0.0572	0.0373	0.544056	0.0602324	5.32402	0.374488	0.244203	198.58	21.9848	1943.27	136.688	89.1341
SUMATERA UTARA	KAB. BATU BARA	SEI SUKA	Average of Province	Filling Data	Worst	1	4.153	1515.96	0.0831	0.0092	0.8132	0.0572	0.0373	0.345114	0.0382076	3.37722	0.237552	0.154907	125.967	13.9458	1232.69	86.7063	56.541
SUMATERA UTARA	KAB. BATU BARA	AIR PUTIH	Average of Province	Filling Data	Worst	1	6.338	2313.19	0.0831	0.0092	0.8132	0.0572	0.0373	0.526688	0.0583096	5.15406	0.362534	0.236407	192.241	21.283	1881.23	132.325	86.2887
SUMATERA UTARA	KAB. BATU BARA	LIMA PULUH	Average of Province	Filling Data	Worst	1	4.364	1592.74	0.0831	0.0092	0.8132	0.0572	0.0373	0.362648	0.0401488	3.5488	0.249621	0.162777	132.367	14.6543	1295.31	91.1116	59.4137
SUMATERA UTARA	KAB. BATU BARA	TALAWI	Average of Province	Filling Data	Worst	1	3.962	1446.24	0.0831	0.0092	0.8132	0.0572	0.0373	0.329242	0.0364504	3.2219	0.226626	0.147783	120.173	13.3044	1175.99	82.7186	53.9406
SUMATERA UTARA	KAB. BATU BARA	TANJUNG TIRAM	Average of Province	Filling Data	Worst	1	4.428	1616.26	0.0831	0.0092	0.8132	0.0572	0.0373	0.367967	0.0407376	3.60085	0.253282	0.165164	134.308	14.8692	1314.31	92.4478	60.285
SUMATERA UTARA	KAB. BATU BARA	SEI BALAI	Average of Province	Filling Data	Worst	1	3.46	1262.79	0.0831	0.0092	0.8132	0.0572	0.0373	0.287526	0.031832	2.81367	0.197912	0.129058	104.947	11.6187	1026.99	72.2379	47.1062
SUMATERA UTARA	KAB. BATU BARA	LAUT TADOR	Average of Province	Filling Data	Worst	1	2.605	950.878	0.0831	0.0092	0.8132	0.0572	0.0373	0.216476	0.023966	2.11839	0.149006	0.0971665	79.0136	8.74759	773.211	54.3872	35.4658
SUMATERA UTARA	KAB. BATU BARA	LIMA PULUH PESISIR	Average of Province	Filling Data	Worst	1	4.408	1608.87	0.0831	0.0092	0.8132	0.0572	0.0373	0.366305	0.0405536	3.58459	0.252138	0.164418	133.701	14.8021	1308.37	92.0302	60.0127
SUMATERA UTARA	KAB. BATU BARA	DATUK LIMA PULUH	Average of Province	Filling Data	Worst	1	3.074	1122.08	0.0831	0.0092	0.8132	0.0572	0.0373	0.255449	0.0282808	2.49978	0.175833	0.11466	93.239	10.3225	912.419	64.179	41.851
SUMATERA UTARA	KAB. BATU BARA	DATUK TANAH DATAR	Average of Province	Filling Data	Worst	1	3.331	1215.85	0.0831	0.0092	0.8132	0.0572	0.0373	0.276806	0.0306452	2.70877	0.190533	0.124246	101.034	11.1855	988.701	69.5446	45.3499
SUMATERA UTARA	KAB. BATU BARA	NIBUNG HANGUS	Average of Province	Filling Data	Worst	1	3.89	1419.87	0.0831	0.0092	0.8132	0.0572	0.0373	0.323259	0.035788	3.16335	0.222508	0.145097	117.99	13.0626	1154.62	81.2154	52.9604
SUMATERA UTARA	KAB. PADANG LAWAS UTARA	DOLOK SIGOMPULON	Average of Province	Filling Data	Worst	1	1.862	679.788	0.0822	0.0093	0.7829	0.0711	0.0545	0.153056	0.0173166	1.45776	0.132388	0.101479	55.8656	6.32056	532.082	48.3217	37.0398
SUMATERA UTARA	KAB. PADANG LAWAS UTARA	DOLOK	Average of Province	Filling Data	Worst	1	2.866	1045.95	0.0822	0.0093	0.7829	0.0711	0.0545	0.235585	0.0266538	2.24379	0.203773	0.156197	85.9886	9.72864	818.984	74.377	57.0119
SUMATERA UTARA	KAB. PADANG LAWAS UTARA	HALONGONAN	Average of Province	Filling Data	Worst	1	2.465	899.77	0.0822	0.0093	0.7829	0.0711	0.0545	0.202623	0.0229245	1.92985	0.175261	0.134343	73.9574	8.36744	704.395	63.9704	49.035
SUMATERA UTARA	KAB. PADANG LAWAS UTARA	PADANG BOLAK	Average of Province	Filling Data	Worst	1	6.242	2278.41	0.0822	0.0093	0.7829	0.0711	0.0545	0.513092	0.0580506	4.88686	0.443806	0.340189	187.279	21.1885	1783.7	161.989	124.169
SUMATERA UTARA	KAB. PADANG LAWAS UTARA	PADANG BOLAK JULU	Average of Province	Filling Data	Worst	1	1.385	505.565	0.0822	0.0093	0.7829	0.0711	0.0545	0.113847	0.0128805	1.08432	0.0984735	0.0754825	41.5542	4.70138	395.776	35.9428	27.5511
SUMATERA UTARA	KAB. PADANG LAWAS UTARA	PORTIBI	Average of Province	Filling Data	Worst	1	3.214	1173.11	0.0822	0.0093	0.7829	0.0711	0.0545	0.264191	0.0298902	2.51624	0.228515	0.175163	96.4296	10.9099	918.428	83.4081	63.9345
SUMATERA UTARA	KAB. PADANG LAWAS UTARA	BATANG ONANG	Average of Province	Filling Data	Worst	1	1.709	623.7	0.0822	0.0093	0.7829	0.0711	0.0545	0.14048	0.0158937	1.33798	0.12151	0.0931405	51.2751	5.8012	488.361	44.3511	33.9963
SUMATERA UTARA	KAB. PADANG LAWAS UTARA	SIMANGAMBAT	Average of Province	Filling Data	Worst	1	4.601	1679.45	0.0822	0.0093	0.7829	0.0711	0.0545	0.378202	0.0427893	3.60212	0.327131	0.250754	138.044	15.6181	1314.77	119.403	91.5254
SUMATERA UTARA	KAB. PADANG LAWAS UTARA	HULU SIHAPAS	Average of Province	Filling Data	Worst	1	0.619	225.902	0.0822	0.0093	0.7829	0.0711	0.0545	0.0508818	0.0057567	0.484615	0.0440109	0.0337355	18.5719	2.1012	176.885	16.064	12.3135
SUMATERA UTARA	KAB. PADANG LAWAS UTARA	PADANG BOLAK TENGGARA	Average of Province	Filling Data	Worst	1	1.399	510.708	0.0822	0.0093	0.7829	0.0711	0.0545	0.114998	0.0130107	1.09528	0.0994689	0.0762455	41.9742	4.74891	399.776	36.3061	27.8296
SUMATERA UTARA	KAB. PADANG LAWAS UTARA	HALONGONAN TIMUR	Average of Province	Filling Data	Worst	1	2.535	925.324	0.0822	0.0093	0.7829	0.0711	0.0545	0.208377	0.0235755	1.98465	0.180238	0.138158	76.0576	8.60506	724.398	65.7871	50.4275
SUMATERA UTARA	KAB. PADANG LAWAS UTARA	UJUNG BATU	Average of Province	Filling Data	Worst	1	1.378	502.952	0.0822	0.0093	0.7829	0.0711	0.0545	0.113272	0.0128154	1.07884	0.0979758	0.075101	41.3441	4.67762	393.775	35.7612	27.4119
SUMATERA UTARA	KAB. PADANG LAWAS	SOSOPAN	Average of Province	Filling Data	Worst	1	1.218	444.579	0.0723	0.0105	0.728	0.1464	0.0428	0.0880614	0.012789	0.886704	0.178315	0.0521304	32.1424	4.66798	323.647	65.085	19.0276
SUMATERA UTARA	KAB. PADANG LAWAS	BARUMUN TENGAH	Average of Province	Filling Data	Worst	1	1.864	680.277	0.0723	0.0105	0.728	0.1464	0.0428	0.134767	0.019572	1.35699	0.27289	0.0797792	49.19	7.14378	495.302	99.6047	29.1194
SUMATERA UTARA	KAB. PADANG LAWAS	HURISTAK	Average of Province	Filling Data	Worst	1	1.798	656.397	0.0723	0.0105	0.728	0.1464	0.0428	0.129995	0.018879	1.30894	0.263227	0.0769544	47.4483	6.89084	477.765	96.0779	28.0884
SUMATERA UTARA	KAB. PADANG LAWAS	LUBUK BARUMUN	Average of Province	Filling Data	Worst	1	2.29	835.845	0.0723	0.0105	0.728	0.1464	0.0428	0.165567	0.024045	1.66712	0.335256	0.098012	60.432	8.77642	608.499	122.368	35.7744
SUMATERA UTARA	KAB. PADANG LAWAS	HUTARAJA TINGGI	Average of Province	Filling Data	Worst	1	4.235	1545.64	0.0723	0.0105	0.728	0.1464	0.0428	0.306191	0.0444675	3.08308	0.620004	0.181258	111.76	16.2306	1125.32	226.301	66.1592
SUMATERA UTARA	KAB. PADANG LAWAS	ULU BARUMUN	Average of Province	Filling Data	Worst	1	1.952	712.648	0.0723	0.0105	0.728	0.1464	0.0428	0.14113	0.020496	1.42106	0.285773	0.0835456	51.5123	7.48104	518.685	104.307	30.4941
SUMATERA UTARA	KAB. PADANG LAWAS	BARUMUN	Average of Province	Filling Data	Worst	1	4.647	1696.14	0.0723	0.0105	0.728	0.1464	0.0428	0.335978	0.0487935	3.38302	0.680321	0.198892	122.632	17.8096	1234.8	248.317	72.5954
SUMATERA UTARA	KAB. PADANG LAWAS	SOSA	Average of Province	Filling Data	Worst	1	2.212	807.393	0.0723	0.0105	0.728	0.1464	0.0428	0.159928	0.023226	1.61034	0.323837	0.0946736	58.3736	8.47749	587.773	118.2	34.5559
SUMATERA UTARA	KAB. PADANG LAWAS	BATANG LUBU SUTAM	Average of Province	Filling Data	Worst	1	0.997	363.917	0.0723	0.0105	0.728	0.1464	0.0428	0.0720831	0.0104685	0.725816	0.145961	0.0426716	26.3103	3.821	264.923	53.2757	15.5751
SUMATERA UTARA	KAB. PADANG LAWAS	BARUMUN SELATAN	Average of Province	Filling Data	Worst	1	0.949	346.486	0.0723	0.0105	0.728	0.1464	0.0428	0.0686127	0.0099645	0.690872	0.138934	0.0406172	25.0436	3.63704	252.168	50.7108	14.8253
SUMATERA UTARA	KAB. PADANG LAWAS	AEK NABARA BARUMUN	Average of Province	Filling Data	Worst	1	1.601	584.185	0.0723	0.0105	0.728	0.1464	0.0428	0.115752	0.0168105	1.16553	0.234386	0.0685228	42.2496	6.13583	425.418	85.551	25.0108
SUMATERA UTARA	KAB. PADANG LAWAS	SIHAPAS BARUMUN	Average of Province	Filling Data	Worst	1	0.657	239.985	0.0723	0.0105	0.728	0.1464	0.0428	0.0475011	0.0068985	0.478296	0.0961848	0.0281196	17.3379	2.51795	174.578	35.1075	10.2637
SUMATERA UTARA	KAB. PADANG LAWAS	BARUMUN BARU	Average of Province	Filling Data	Worst	1	1.455	531.159	0.0723	0.0105	0.728	0.1464	0.0428	0.105197	0.0152775	1.05924	0.213012	0.062274	38.3967	5.57629	386.623	77.7494	22.73
SUMATERA UTARA	KAB. PADANG LAWAS	ULU SOSA	Average of Province	Filling Data	Worst	1	1.092	398.737	0.0723	0.0105	0.728	0.1464	0.0428	0.0789516	0.011466	0.794976	0.159869	0.0467376	28.8173	4.18509	290.166	58.3521	17.0592
SUMATERA UTARA	KAB. PADANG LAWAS	SOSA JULU	Average of Province	Filling Data	Worst	1	1.167	426.046	0.0723	0.0105	0.728	0.1464	0.0428	0.0843741	0.0122535	0.849576	0.170849	0.0499476	30.7965	4.47253	310.095	62.3598	18.2309
SUMATERA UTARA	KAB. PADANG LAWAS	BARUMUN BARAT	Average of Province	Filling Data	Worst	1	0.493	180.101	0.0723	0.0105	0.728	0.1464	0.0428	0.0356439	0.0051765	0.358904	0.0721752	0.0211004	13.01	1.88942	131	26.3439	7.70165
SUMATERA UTARA	KAB. PADANG LAWAS	SOSA TIMUR	Average of Province	Filling Data	Worst	1	0.944	344.731	0.0723	0.0105	0.728	0.1464	0.0428	0.0682512	0.009912	0.687232	0.138202	0.0404032	24.9117	3.61788	250.84	50.4436	14.7472
SUMATERA UTARA	KAB. LABUHANBATU SELATAN	KOTAPINANG	Average of Province	Filling Data	Worst	1	7.268	2652.94	0.1501	0.0185	0.7885	0.0312	0.0117	1.09093	0.134458	5.73082	0.226762	0.0850356	398.188	49.0772	2091.75	82.768	31.038
SUMATERA UTARA	KAB. LABUHANBATU SELATAN	KAMPUNG RAKYAT	Average of Province	Filling Data	Worst	1	7.109	2594.69	0.1501	0.0185	0.7885	0.0312	0.0117	1.06706	0.131517	5.60545	0.221801	0.0831753	389.477	48.0035	2045.99	80.9573	30.359
SUMATERA UTARA	KAB. LABUHANBATU SELATAN	TORGAMBA	Average of Province	Filling Data	Worst	1	12.833	4683.89	0.1501	0.0185	0.7885	0.0312	0.0117	1.92623	0.237411	10.1188	0.40039	0.150146	703.075	86.6548	3693.37	146.142	54.8033
SUMATERA UTARA	KAB. LABUHANBATU SELATAN	SUNGAI KANAN	Average of Province	Filling Data	Worst	1	5.632	2055.65	0.1501	0.0185	0.7885	0.0312	0.0117	0.845363	0.104192	4.44083	0.175718	0.0658944	308.558	38.0301	1620.9	64.1372	24.0515
SUMATERA UTARA	KAB. LABUHANBATU SELATAN	SILANGKITANG	Average of Province	Filling Data	Worst	1	3.571	1303.45	0.1501	0.0185	0.7885	0.0312	0.0117	0.536007	0.0660635	2.81573	0.111415	0.0417807	195.643	24.1132	1027.74	40.6665	15.25
SUMATERA UTARA	KAB. LABUHANBATU UTARA	KUALUH HULU	Average of Province	Filling Data	Worst	1	8.715	3180.83	0.1205	0.0014	0.818	0.0339	0.0262	1.05016	0.012201	7.12887	0.295438	0.228333	383.307	4.45337	2602.04	107.835	83.3415
SUMATERA UTARA	KAB. LABUHANBATU UTARA	KUALUH LEIDONG	Average of Province	Filling Data	Worst	1	3.994	1457.87	0.1205	0.0014	0.818	0.0339	0.0262	0.481277	0.0055916	3.26709	0.135397	0.104643	175.666	2.04093	1192.49	49.4198	38.1946
SUMATERA UTARA	KAB. LABUHANBATU UTARA	KUALUH HILIR	Average of Province	Filling Data	Worst	1	3.956	1443.79	0.1205	0.0014	0.818	0.0339	0.0262	0.476698	0.0055384	3.23601	0.134108	0.103647	173.995	2.02152	1181.14	48.9496	37.8312
SUMATERA UTARA	KAB. LABUHANBATU UTARA	AEK KUO	Average of Province	Filling Data	Worst	1	3.94	1438.03	0.1205	0.0014	0.818	0.0339	0.0262	0.47477	0.005516	3.22292	0.133566	0.103228	173.291	2.01334	1176.37	48.7516	37.6782
SUMATERA UTARA	KAB. LABUHANBATU UTARA	MARBAU	Average of Province	Filling Data	Worst	1	4.95	1806.72	0.1205	0.0014	0.818	0.0339	0.0262	0.596475	0.00693	4.0491	0.167805	0.12969	217.713	2.52945	1477.92	61.2488	47.3368
SUMATERA UTARA	KAB. LABUHANBATU UTARA	NA IX - X	Average of Province	Filling Data	Worst	1	6.726	2454.84	0.1205	0.0014	0.818	0.0339	0.0262	0.810483	0.0094164	5.50187	0.228011	0.176221	295.826	3.43699	2008.18	83.2242	64.3207
SUMATERA UTARA	KAB. LABUHANBATU UTARA	AEK NATAS	Average of Province	Filling Data	Worst	1	4.449	1623.81	0.1205	0.0014	0.818	0.0339	0.0262	0.536105	0.0062286	3.63928	0.150821	0.116564	195.678	2.27344	1328.34	55.0497	42.5458
SUMATERA UTARA	KAB. LABUHANBATU UTARA	KUALUH SELATAN	Average of Province	Filling Data	Worst	1	7.64	2788.59	0.1205	0.0014	0.818	0.0339	0.0262	0.92062	0.010696	6.24952	0.258996	0.200168	336.026	3.90404	2281.07	94.5335	73.0613
SUMATERA UTARA	KAB. NIAS UTARA	LOTU	Average of Province	Filling Data	Worst	1	1.617	590.145	0.0733	0.023	0.2324	0.1064	0.5649	0.118526	0.037191	0.375791	0.172049	0.913443	43.262	13.5747	137.164	62.7978	333.407
SUMATERA UTARA	KAB. NIAS UTARA	SAWO	Average of Province	Filling Data	Worst	1	1.303	475.521	0.0733	0.023	0.2324	0.1064	0.5649	0.0955099	0.029969	0.302817	0.138639	0.736065	34.8611	10.9387	110.528	50.6033	268.664
SUMATERA UTARA	KAB. NIAS UTARA	TUHEMBERUA	Average of Province	Filling Data	Worst	1	1.533	559.366	0.0733	0.023	0.2324	0.1064	0.5649	0.112369	0.035259	0.356269	0.163111	0.865992	41.0146	12.8695	130.038	59.5356	316.087
SUMATERA UTARA	KAB. NIAS UTARA	SITOLU ORI	Average of Province	Filling Data	Worst	1	1.536	560.469	0.0733	0.023	0.2324	0.1064	0.5649	0.112589	0.035328	0.356966	0.16343	0.867686	41.0949	12.8947	130.293	59.6521	316.706
SUMATERA UTARA	KAB. NIAS UTARA	NAMOHALU ESIWA	Average of Province	Filling Data	Worst	1	1.725	629.741	0.0733	0.023	0.2324	0.1064	0.5649	0.126443	0.039675	0.40089	0.18354	0.974453	46.1515	14.4814	146.325	66.9921	355.675
SUMATERA UTARA	KAB. NIAS UTARA	ALASA TALUMUZOI	Average of Province	Filling Data	Worst	1	0.824	300.685	0.0733	0.023	0.2324	0.1064	0.5649	0.0603992	0.018952	0.191498	0.0876736	0.465478	22.0457	6.91748	69.8966	32.0009	169.899
SUMATERA UTARA	KAB. NIAS UTARA	ALASA	Average of Province	Filling Data	Worst	1	2.386	870.747	0.0733	0.023	0.2324	0.1064	0.5649	0.174894	0.054878	0.554506	0.25387	1.34785	63.8362	20.0305	202.395	92.6627	491.966
SUMATERA UTARA	KAB. NIAS UTARA	TUGALA OYO	Average of Province	Filling Data	Worst	1	0.773	282.275	0.0733	0.023	0.2324	0.1064	0.5649	0.0566609	0.017779	0.179645	0.0822472	0.436668	20.6812	6.48933	65.5705	30.0202	159.384
SUMATERA UTARA	KAB. NIAS UTARA	AFULU	Average of Province	Filling Data	Worst	1	1.385	505.687	0.0733	0.023	0.2324	0.1064	0.5649	0.10152	0.031855	0.321874	0.147364	0.782387	37.055	11.6271	117.484	53.7879	285.571
SUMATERA UTARA	KAB. NIAS UTARA	LAHEWA	Average of Province	Filling Data	Worst	1	2.82	1029.34	0.0733	0.023	0.2324	0.1064	0.5649	0.206706	0.06486	0.655368	0.300048	1.59302	75.4477	23.6739	239.209	109.518	581.452
SUMATERA UTARA	KAB. NIAS UTARA	LAHEWA TIMUR	Average of Province	Filling Data	Worst	1	1.194	435.884	0.0733	0.023	0.2324	0.1064	0.5649	0.0875202	0.027462	0.277486	0.127042	0.674491	31.9449	10.0236	101.282	46.3702	246.189
SUMATERA UTARA	KAB. NIAS BARAT	LAHOMI	Average of Province	Filling Data	Worst	1	1.205	439.762	0.0733	0.023	0.2324	0.1064	0.5649	0.0883265	0.027715	0.280042	0.128212	0.680705	32.2392	10.116	102.215	46.7974	248.457
SUMATERA UTARA	KAB. NIAS BARAT	SIROMBU	Average of Province	Filling Data	Worst	1	1.546	564.265	0.0733	0.023	0.2324	0.1064	0.5649	0.113322	0.035558	0.35929	0.164494	0.873335	41.3625	12.9787	131.141	60.0405	318.767
SUMATERA UTARA	KAB. NIAS BARAT	MANDREHE BARAT	Average of Province	Filling Data	Worst	1	1.034	377.592	0.0733	0.023	0.2324	0.1064	0.5649	0.0757922	0.023782	0.240302	0.110018	0.584107	27.6642	8.68043	87.7101	40.1564	213.199
SUMATERA UTARA	KAB. NIAS BARAT	MORO'O	Average of Province	Filling Data	Worst	1	1.24	452.743	0.0733	0.023	0.2324	0.1064	0.5649	0.090892	0.02852	0.288176	0.131936	0.700476	33.1756	10.4098	105.184	48.1566	255.674
SUMATERA UTARA	KAB. NIAS BARAT	MANDREHE	Average of Province	Filling Data	Worst	1	2.675	976.391	0.0733	0.023	0.2324	0.1064	0.5649	0.196077	0.061525	0.62167	0.28462	1.51111	71.5683	22.4566	226.91	103.886	551.554
SUMATERA UTARA	KAB. NIAS BARAT	MANDREHE UTARA	Average of Province	Filling Data	Worst	1	1.135	414.371	0.0733	0.023	0.2324	0.1064	0.5649	0.0831955	0.026105	0.263774	0.120764	0.641162	30.3664	9.52833	96.2775	44.0789	234.024
SUMATERA UTARA	KAB. NIAS BARAT	LOLOFITU MOI	Average of Province	Filling Data	Worst	1	1.259	459.682	0.0733	0.023	0.2324	0.1064	0.5649	0.0922847	0.028957	0.292592	0.133958	0.711209	33.6839	10.5693	106.796	48.8945	259.591
SUMATERA UTARA	KAB. NIAS BARAT	ULU MORO'O	Average of Province	Filling Data	Worst	1	0.768	280.479	0.0733	0.023	0.2324	0.1064	0.5649	0.0562944	0.017664	0.178483	0.0817152	0.433843	20.5475	6.44736	65.1464	29.826	158.353
SUMATERA UTARA	KOTA MEDAN	MEDAN KOTA	SIPSN	2022	Good	4	11.631	4245.35	0.728	0.0011	0.2325	0.0211	0.0173	8.46737	0.0127941	2.70421	0.245414	0.201216	3090.59	4.66985	987.036	89.5761	73.4439
SUMATERA UTARA	KOTA MEDAN	MEDAN SUNGGAL	SIPSN	2022	Good	4	18.009	6573.35	0.728	0.0011	0.2325	0.0211	0.0173	13.1106	0.0198099	4.18709	0.37999	0.311556	4785.35	7.23061	1528.29	138.696	113.718
SUMATERA UTARA	KOTA MEDAN	MEDAN HELVETIA	SIPSN	2022	Good	4	22.732	8297.15	0.728	0.0011	0.2325	0.0211	0.0173	16.5489	0.0250052	5.28519	0.479645	0.393264	6040.35	9.1269	1929.09	175.07	143.541
SUMATERA UTARA	KOTA MEDAN	MEDAN DENAI	SIPSN	2022	Good	4	23.532	8589.26	0.728	0.0011	0.2325	0.0211	0.0173	17.1313	0.0258852	5.47119	0.496525	0.407104	6252.92	9.4481	1996.98	181.232	148.593
SUMATERA UTARA	KOTA MEDAN	MEDAN BARAT	SIPSN	2022	Good	4	12.26	4474.88	0.728	0.0011	0.2325	0.0211	0.0173	8.92528	0.013486	2.85045	0.258686	0.212098	3257.73	4.92239	1040.41	94.4204	77.4158
SUMATERA UTARA	KOTA MEDAN	MEDAN DELI	SIPSN	2022	Good	4	25.879	9445.67	0.728	0.0011	0.2325	0.0211	0.0173	18.8399	0.0284669	6.01687	0.546047	0.447707	6876.57	10.3904	2196.16	199.307	163.413
SUMATERA UTARA	KOTA MEDAN	MEDAN TUNTUNGAN	SIPSN	2022	Good	4	13.02	4752.26	0.728	0.0011	0.2325	0.0211	0.0173	9.47856	0.014322	3.02715	0.274722	0.225246	3459.67	5.22753	1104.91	100.274	82.2148
SUMATERA UTARA	KOTA MEDAN	MEDAN BELAWAN	SIPSN	2022	Good	4	14.973	5464.97	0.728	0.0011	0.2325	0.0211	0.0173	10.9003	0.0164703	3.48122	0.31593	0.259033	3978.63	6.01166	1270.65	115.315	94.547
SUMATERA UTARA	KOTA MEDAN	MEDAN AMPLAS	SIPSN	2022	Good	4	17.782	6490.25	0.728	0.0011	0.2325	0.0211	0.0173	12.9453	0.0195602	4.13432	0.3752	0.307629	4725.03	7.13947	1509.02	136.948	112.284
SUMATERA UTARA	KOTA MEDAN	MEDAN AREA	SIPSN	2022	Good	4	15.7	5730.55	0.728	0.0011	0.2325	0.0211	0.0173	11.4296	0.01727	3.65025	0.33127	0.27161	4171.8	6.30355	1332.34	120.914	99.1376
SUMATERA UTARA	KOTA MEDAN	MEDAN JOHOR	SIPSN	2022	Good	4	21.094	7699.13	0.728	0.0011	0.2325	0.0211	0.0173	15.3564	0.0232034	4.90436	0.445083	0.364926	5605.1	8.46924	1790.09	162.455	133.198
SUMATERA UTARA	KOTA MEDAN	MEDAN MARELAN	SIPSN	2022	Good	4	25.475	9298.38	0.728	0.0011	0.2325	0.0211	0.0173	18.5458	0.0280225	5.92294	0.537523	0.440717	6769.22	10.2282	2161.87	196.196	160.862
SUMATERA UTARA	KOTA MEDAN	MEDAN LABUHAN	SIPSN	2022	Good	4	18.5	6752.38	0.728	0.0011	0.2325	0.0211	0.0173	13.468	0.02035	4.30125	0.39035	0.32005	4915.82	7.42775	1569.96	142.478	116.818
SUMATERA UTARA	KOTA MEDAN	MEDAN TEMBUNG	SIPSN	2022	Good	4	20.433	7458.19	0.728	0.0011	0.2325	0.0211	0.0173	14.8752	0.0224763	4.75067	0.431136	0.353491	5429.46	8.20385	1734	157.365	129.024
SUMATERA UTARA	KOTA MEDAN	MEDAN MAIMUN	SIPSN	2022	Good	4	7.005	2556.93	0.728	0.0011	0.2325	0.0211	0.0173	5.09964	0.0077055	1.62866	0.147805	0.121186	1861.37	2.81251	594.462	53.949	44.2331
SUMATERA UTARA	KOTA MEDAN	MEDAN POLONIA	SIPSN	2022	Good	4	8.231	3004.21	0.728	0.0011	0.2325	0.0211	0.0173	5.99217	0.0090541	1.91371	0.173674	0.142396	2187.14	3.30475	698.503	63.391	51.9746
SUMATERA UTARA	KOTA MEDAN	MEDAN BARU	SIPSN	2022	Good	4	4.873	1778.52	0.728	0.0011	0.2325	0.0211	0.0173	3.54754	0.0053603	1.13297	0.10282	0.0843029	1294.85	1.95651	413.535	37.5294	30.7706
SUMATERA UTARA	KOTA MEDAN	MEDAN PERJUANGAN	SIPSN	2022	Good	4	14.659	5350.58	0.728	0.0011	0.2325	0.0211	0.0173	10.6718	0.0161249	3.40822	0.309305	0.253601	3895.19	5.88559	1244	112.896	92.5643
SUMATERA UTARA	KOTA MEDAN	MEDAN PETISAH	SIPSN	2022	Good	4	9.878	3605.54	0.728	0.0011	0.2325	0.0211	0.0173	7.19118	0.0108658	2.29664	0.208426	0.170889	2624.78	3.96602	838.272	76.0754	62.3746
SUMATERA UTARA	KOTA MEDAN	MEDAN TIMUR	SIPSN	2022	Good	4	16.308	5952.34	0.728	0.0011	0.2325	0.0211	0.0173	11.8722	0.0179388	3.79161	0.344099	0.282128	4333.36	6.54766	1383.94	125.596	102.977
SUMATERA UTARA	KOTA MEDAN	MEDAN SELAYANG	SIPSN	2022	Good	4	14.614	5334.2	0.728	0.0011	0.2325	0.0211	0.0173	10.639	0.0160754	3.39776	0.308355	0.252822	3883.23	5.86752	1240.18	112.55	92.2801
SUMATERA UTARA	KOTA PEMATANGSIANTAR	SIANTAR TIMUR	Average of Province	Filling Data	Worst	1	6.307	2302	0.7928	0	0.1251	0.0665	0.0156	5.00019	0	0.789006	0.419416	0.0983892	1825.07	0	287.987	153.087	35.9121
SUMATERA UTARA	KOTA PEMATANGSIANTAR	SIANTAR BARAT	Average of Province	Filling Data	Worst	1	6.457	2356.69	0.7928	0	0.1251	0.0665	0.0156	5.11911	0	0.807771	0.429391	0.100729	1868.48	0	294.836	156.728	36.7662
SUMATERA UTARA	KOTA PEMATANGSIANTAR	SIANTAR UTARA	Average of Province	Filling Data	Worst	1	8.316	3035.16	0.7928	0	0.1251	0.0665	0.0156	6.59292	0	1.04033	0.553014	0.12973	2406.42	0	379.721	201.85	47.3513
SUMATERA UTARA	KOTA PEMATANGSIANTAR	SIANTAR SELATAN	Average of Province	Filling Data	Worst	1	2.934	1070.85	0.7928	0	0.1251	0.0665	0.0156	2.32608	0	0.367043	0.195111	0.0457704	849.017	0	133.971	71.2155	16.7062
SUMATERA UTARA	KOTA PEMATANGSIANTAR	SIANTAR MARIHAT	Average of Province	Filling Data	Worst	1	3.469	1266.02	0.7928	0	0.1251	0.0665	0.0156	2.75022	0	0.433972	0.230688	0.0541164	1003.83	0	158.4	84.2013	19.7525
SUMATERA UTARA	KOTA PEMATANGSIANTAR	SIANTAR MARTOBA	Average of Province	Filling Data	Worst	1	8.445	3082.51	0.7928	0	0.1251	0.0665	0.0156	6.6952	0	1.05647	0.561593	0.131742	2443.75	0	385.611	204.981	48.0858
SUMATERA UTARA	KOTA PEMATANGSIANTAR	SIANTAR SITALASARI	Average of Province	Filling Data	Worst	1	5.611	2047.9	0.7928	0	0.1251	0.0665	0.0156	4.4484	0	0.701936	0.373132	0.0875316	1623.67	0	256.207	136.193	31.949
SUMATERA UTARA	KOTA PEMATANGSIANTAR	SIANTAR MARIMBUN	Average of Province	Filling Data	Worst	1	3.346	1221.12	0.7928	0	0.1251	0.0665	0.0156	2.65271	0	0.418585	0.222509	0.0521976	968.239	0	152.783	81.2158	19.0521
SUMATERA UTARA	KOTA SIBOLGA	SIBOLGA UTARA	SIPSN	2020	Bad	2	2.917	1064.57	0.495174	0	0.352726	0.1306	0.0215	1.44442	0	1.0289	0.38096	0.0627155	527.214	0	375.549	139.05	22.8912
SUMATERA UTARA	KOTA SIBOLGA	SIBOLGA KOTA	SIPSN	2020	Bad	2	2.154	786.375	0.495174	0	0.352726	0.1306	0.0215	1.06661	0	0.759771	0.281312	0.046311	389.311	0	277.317	102.679	16.9035
SUMATERA UTARA	KOTA SIBOLGA	SIBOLGA SELATAN	SIPSN	2020	Bad	2	4.568	1667.33	0.495174	0	0.352726	0.1306	0.0215	2.26196	0	1.61125	0.596581	0.098212	825.614	0	588.107	217.752	35.8474
SUMATERA UTARA	KOTA SIBOLGA	SIBOLGA SAMBAS	SIPSN	2020	Bad	2	2.888	1054.19	0.495174	0	0.352726	0.1306	0.0215	1.43006	0	1.01867	0.377173	0.062092	521.973	0	371.815	137.668	22.6636
SUMATERA UTARA	KOTA TANJUNG BALAI	TANJUNGBALAI SELATAN	Average of Province	Filling Data	Worst	1	2.266	827.191	0.4863	0.0119	0.3154	0.0803	0.1061	1.10196	0.0269654	0.714696	0.18196	0.240423	402.214	9.84237	260.864	66.4153	87.7542
SUMATERA UTARA	KOTA TANJUNG BALAI	TANJUNGBALAI UTARA	Average of Province	Filling Data	Worst	1	2.015	735.345	0.4863	0.0119	0.3154	0.0803	0.1061	0.979895	0.0239785	0.635531	0.161804	0.213792	357.661	8.75215	231.969	59.0586	78.0339
SUMATERA UTARA	KOTA TANJUNG BALAI	SEI TUALANG RASO	Average of Province	Filling Data	Worst	1	3.054	1114.69	0.4863	0.0119	0.3154	0.0803	0.1061	1.48516	0.0363426	0.963232	0.245236	0.324029	542.083	13.265	351.58	89.5112	118.271
SUMATERA UTARA	KOTA TANJUNG BALAI	TELUK NIBUNG	Average of Province	Filling Data	Worst	1	4.706	1717.61	0.4863	0.0119	0.3154	0.0803	0.1061	2.28853	0.0560014	1.48427	0.377892	0.499307	835.313	20.4405	541.759	137.931	182.247
SUMATERA UTARA	KOTA TANJUNG BALAI	DATUK BANDAR	Average of Province	Filling Data	Worst	1	4.616	1684.92	0.4863	0.0119	0.3154	0.0803	0.1061	2.24476	0.0549304	1.45589	0.370665	0.489758	819.338	20.0496	531.399	135.293	178.762
SUMATERA UTARA	KOTA TANJUNG BALAI	DATUK BANDAR TIMUR	Average of Province	Filling Data	Worst	1	3.559	1298.96	0.4863	0.0119	0.3154	0.0803	0.1061	1.73074	0.0423521	1.12251	0.285788	0.37761	631.721	15.4585	409.716	104.313	137.828
SUMATERA UTARA	KOTA BINJAI	BINJAI UTARA	Average of Province	Filling Data	Worst	1	10.022	3658.06	0.4524	0.0108	0.5192	0.011	0.0066	4.53395	0.108238	5.20342	0.110242	0.0661452	1654.89	39.5067	1899.25	40.2383	24.143
SUMATERA UTARA	KOTA BINJAI	BINJAI KOTA	Average of Province	Filling Data	Worst	1	3.85	1405.28	0.4524	0.0108	0.5192	0.011	0.0066	1.74174	0.04158	1.99892	0.04235	0.02541	635.735	15.1767	729.606	15.4578	9.27465
SUMATERA UTARA	KOTA BINJAI	BINJAI BARAT	Average of Province	Filling Data	Worst	1	5.917	2159.68	0.4524	0.0108	0.5192	0.011	0.0066	2.67685	0.0639036	3.07211	0.065087	0.0390522	977.051	23.3248	1121.32	23.7568	14.2541
SUMATERA UTARA	KOTA BINJAI	BINJAI TIMUR	Average of Province	Filling Data	Worst	1	7.568	2762.44	0.4524	0.0108	0.5192	0.011	0.0066	3.42376	0.0817344	3.92931	0.083248	0.0499488	1249.67	29.8331	1434.2	30.3855	18.2313
SUMATERA UTARA	KOTA BINJAI	BINJAI SELATAN	Average of Province	Filling Data	Worst	1	6.819	2488.95	0.4524	0.0108	0.5192	0.011	0.0066	3.08492	0.0736452	3.54042	0.075009	0.0450054	1125.99	26.8805	1292.26	27.3783	16.427
SUMATERA UTARA	KOTA TEBING TINGGI	PADANG HULU	SIPSN	2022	Good	4	4.51	1646.05	0.6757	0.0043	0.3073	0.0038	0.0089	3.04741	0.019393	1.38592	0.017138	0.040139	1112.3	7.07845	505.862	6.25537	14.6507
SUMATERA UTARA	KOTA TEBING TINGGI	RAMBUTAN	SIPSN	2022	Good	4	5.385	1965.65	0.6757	0.0043	0.3073	0.0038	0.0089	3.63864	0.0231555	1.65481	0.020463	0.0479265	1328.11	8.45176	604.006	7.46899	17.4932
SUMATERA UTARA	KOTA TEBING TINGGI	PADANG HILIR	SIPSN	2022	Good	4	5.445	1987.53	0.6757	0.0043	0.3073	0.0038	0.0089	3.67919	0.0234135	1.67325	0.020691	0.0484605	1342.9	8.54593	610.736	7.55222	17.6881
SUMATERA UTARA	KOTA TEBING TINGGI	BAJENIS	SIPSN	2022	Good	4	5.299	1934.1	0.6757	0.0043	0.3073	0.0038	0.0089	3.58053	0.0227857	1.62838	0.0201362	0.0471611	1306.9	8.31678	594.36	7.34971	17.2138
SUMATERA UTARA	KOTA TEBING TINGGI	TEBING TINGGI KOTA	SIPSN	2022	Good	4	3.403	1242.12	0.6757	0.0043	0.3073	0.0038	0.0089	2.29941	0.0146329	1.04574	0.0129314	0.0302867	839.284	5.34101	381.696	4.71996	11.0546
SUMATERA UTARA	KOTA PADANG SIDEMPUAN	PADANGSIDIMPUAN UTARA	Average of Province	Filling Data	Worst	1	9.069	3310.03	0.6741	0	0.2155	0.0931	0.0173	6.11341	0	1.95437	0.844324	0.156894	2231.4	0	713.345	308.178	57.2662
SUMATERA UTARA	KOTA PADANG SIDEMPUAN	PADANGSIDIMPUAN SELATAN	Average of Province	Filling Data	Worst	1	9.509	3470.68	0.6741	0	0.2155	0.0931	0.0173	6.41002	0	2.04919	0.885288	0.164506	2339.66	0	747.954	323.13	60.0446
SUMATERA UTARA	KOTA PADANG SIDEMPUAN	PADANGSIDIMPUAN BATUNADUA	Average of Province	Filling Data	Worst	1	4.012	1464.25	0.6741	0	0.2155	0.0931	0.0173	2.70449	0	0.864586	0.373517	0.0694076	987.139	0	315.574	136.334	25.3338
SUMATERA UTARA	KOTA PADANG SIDEMPUAN	PADANGSIDIMPUAN HUTAIMBARU	Average of Province	Filling Data	Worst	1	2.725	994.693	0.6741	0	0.2155	0.0931	0.0173	1.83692	0	0.587238	0.253698	0.0471425	670.477	0	214.342	92.5996	17.207
SUMATERA UTARA	KOTA PADANG SIDEMPUAN	PADANGSIDIMPUAN TENGGARA	Average of Province	Filling Data	Worst	1	4.72	1722.87	0.6741	0	0.2155	0.0931	0.0173	3.18175	0	1.01716	0.439432	0.081656	1161.34	0	371.263	160.393	29.8044
SUMATERA UTARA	KOTA PADANG SIDEMPUAN	PADANGSIDIMPUAN ANGKOLA JULU	Average of Province	Filling Data	Worst	1	1.314	479.452	0.6741	0	0.2155	0.0931	0.0173	0.885767	0	0.283167	0.122333	0.0227322	323.305	0	103.356	44.6517	8.29725
SUMATERA UTARA	KOTA GUNUNGSITOLI	GUNUNGSITOLI	Average of Province	Filling Data	Worst	1	6.989	2551	0.2737	0.0208	0.3415	0.1373	0.2267	1.91289	0.145371	2.38674	0.95959	1.58441	698.205	53.0605	871.161	350.25	578.308
SUMATERA UTARA	KOTA GUNUNGSITOLI	GUNUNGSITOLI SELATAN	Average of Province	Filling Data	Worst	1	1.664	607.389	0.2737	0.0208	0.3415	0.1373	0.2267	0.455437	0.0346112	0.568256	0.228467	0.377229	166.234	12.6331	207.413	83.3905	137.689
SUMATERA UTARA	KOTA GUNUNGSITOLI	GUNUNGSITOLI UTARA	Average of Province	Filling Data	Worst	1	2.091	763.241	0.2737	0.0208	0.3415	0.1373	0.2267	0.572307	0.0434928	0.714077	0.287094	0.47403	208.892	15.8749	260.638	104.789	173.021
SUMATERA UTARA	KOTA GUNUNGSITOLI	GUNUNGSITOLI IDANOI	Average of Province	Filling Data	Worst	1	2.797	1020.96	0.2737	0.0208	0.3415	0.1373	0.2267	0.765539	0.0581776	0.955175	0.384028	0.63408	279.422	21.2348	348.639	140.17	231.439
SUMATERA UTARA	KOTA GUNUNGSITOLI	GUNUNGSITOLI ALO'OA	Average of Province	Filling Data	Worst	1	0.913	333.37	0.2737	0.0208	0.3415	0.1373	0.2267	0.249888	0.0189904	0.311789	0.125355	0.206977	91.2092	6.9315	113.803	45.7545	75.5466
SUMATERA UTARA	KOTA GUNUNGSITOLI	GUNUNGSITOLI BARAT	Average of Province	Filling Data	Worst	1	0.977	356.717	0.2737	0.0208	0.3415	0.1373	0.2267	0.267405	0.0203216	0.333645	0.134142	0.221486	97.6028	7.41738	121.781	48.9619	80.8424
SUMATERA BARAT	KAB. PESISIR SELATAN	PANCUNG SOAL	SIPSN	2022	Good	4	1.56	569.428	0.0593	0.0136	0.708	0.1366	0.0825	0.092508	0.021216	1.10448	0.213096	0.1287	33.7654	7.74384	403.135	77.78	46.9755
SUMATERA BARAT	KAB. PESISIR SELATAN	RANAH PESISIR	SIPSN	2022	Good	4	1.979	722.256	0.0593	0.0136	0.708	0.1366	0.0825	0.117355	0.0269144	1.40113	0.270331	0.163268	42.8345	9.82376	511.413	98.671	59.5926
SUMATERA BARAT	KAB. PESISIR SELATAN	LENGAYANG	SIPSN	2022	Good	4	3.565	1301.1	0.0593	0.0136	0.708	0.1366	0.0825	0.211404	0.048484	2.52402	0.486979	0.294112	77.1626	17.6967	921.267	177.747	107.351
SUMATERA BARAT	KAB. PESISIR SELATAN	BATANG KAPAS	SIPSN	2022	Good	4	2.124	775.365	0.0593	0.0136	0.708	0.1366	0.0825	0.125953	0.0288864	1.50379	0.290138	0.17523	45.9729	10.5435	548.884	105.901	63.959
SUMATERA BARAT	KAB. PESISIR SELATAN	IV JURAI	SIPSN	2022	Good	4	2.999	1094.66	0.0593	0.0136	0.708	0.1366	0.0825	0.177841	0.0407864	2.12329	0.409663	0.247418	64.9119	14.887	775.002	149.527	90.3074
SUMATERA BARAT	KAB. PESISIR SELATAN	BAYANG	SIPSN	2022	Good	4	2.494	910.469	0.0593	0.0136	0.708	0.1366	0.0825	0.147894	0.0339184	1.76575	0.34068	0.205755	53.9814	12.3802	644.499	124.348	75.1006
SUMATERA BARAT	KAB. PESISIR SELATAN	KOTO XI TARUSAN	SIPSN	2022	Good	4	3.111	1135.59	0.0593	0.0136	0.708	0.1366	0.0825	0.184482	0.0423096	2.20259	0.424963	0.256658	67.336	15.443	803.945	155.111	93.68
SUMATERA BARAT	KAB. PESISIR SELATAN	SUTERA	SIPSN	2022	Good	4	3.328	1214.85	0.0593	0.0136	0.708	0.1366	0.0825	0.19735	0.0452608	2.35622	0.454605	0.27456	72.0329	16.5202	860.022	165.931	100.214
SUMATERA BARAT	KAB. PESISIR SELATAN	LINGGO SARI BAGANTI	SIPSN	2022	Good	4	2.903	1059.69	0.0593	0.0136	0.708	0.1366	0.0825	0.172148	0.0394808	2.05532	0.39655	0.239498	62.834	14.4105	750.193	144.741	87.4166
SUMATERA BARAT	KAB. PESISIR SELATAN	LUNANG	SIPSN	2022	Good	4	1.294	472.167	0.0593	0.0136	0.708	0.1366	0.0825	0.0767342	0.0175984	0.916152	0.17676	0.106755	28.008	6.42342	334.395	64.5175	38.9656
SUMATERA BARAT	KAB. PESISIR SELATAN	BASA AMPEK BALAI TAPAN	SIPSN	2022	Good	4	0.926	338	0.0593	0.0136	0.708	0.1366	0.0825	0.0549118	0.0125936	0.655608	0.126492	0.076395	20.0428	4.59666	239.297	46.1694	27.8842
SUMATERA BARAT	KAB. PESISIR SELATAN	IV NAGARI BAYANG UTARA	SIPSN	2022	Good	4	0.488	178.008	0.0593	0.0136	0.708	0.1366	0.0825	0.0289384	0.0066368	0.345504	0.0666608	0.04026	10.5625	2.42243	126.109	24.3312	14.6949
SUMATERA BARAT	KAB. PESISIR SELATAN	AIRPURA	SIPSN	2022	Good	4	1.108	404.25	0.0593	0.0136	0.708	0.1366	0.0825	0.0657044	0.0150688	0.784464	0.151353	0.09141	23.9821	5.50011	286.329	55.2438	33.3647
SUMATERA BARAT	KAB. PESISIR SELATAN	RANAH AMPEK HULU TAPAN	SIPSN	2022	Good	4	0.9	328.648	0.0593	0.0136	0.708	0.1366	0.0825	0.05337	0.01224	0.6372	0.12294	0.07425	19.48	4.4676	232.578	44.8731	27.1013
SUMATERA BARAT	KAB. PESISIR SELATAN	SILAUT	SIPSN	2022	Good	4	0.909	331.606	0.0593	0.0136	0.708	0.1366	0.0825	0.0539037	0.0123624	0.643572	0.124169	0.0749925	19.6749	4.51228	234.904	45.3218	27.3723
SUMATERA BARAT	KAB. SOLOK	PANTAI CERMIN	SIPSN	2022	Good	4	3.052	1114.05	0.197681	0.0136	0.569619	0.1366	0.0825	0.603321	0.0415072	1.73848	0.416903	0.25179	220.212	15.1501	634.545	152.17	91.9034
SUMATERA BARAT	KAB. SOLOK	LEMBAH GUMANTI	SIPSN	2022	Good	4	8.363	3052.45	0.197681	0.0136	0.569619	0.1366	0.0825	1.6532	0.113737	4.76373	1.14239	0.689948	603.419	41.5139	1738.76	416.971	251.831
SUMATERA BARAT	KAB. SOLOK	PAYUNG SEKAKI	SIPSN	2022	Good	4	1.233	449.942	0.197681	0.0136	0.569619	0.1366	0.0825	0.24374	0.0167688	0.702341	0.168428	0.101723	88.9652	6.12061	256.354	61.4761	37.1287
SUMATERA BARAT	KAB. SOLOK	LEMBANG JAYA	SIPSN	2022	Good	4	4.04	1474.66	0.197681	0.0136	0.569619	0.1366	0.0825	0.79863	0.054944	2.30126	0.551864	0.3333	291.5	20.0546	839.961	201.43	121.655
SUMATERA BARAT	KAB. SOLOK	GUNUNG TALANG	SIPSN	2022	Good	4	7.206	2630.34	0.197681	0.0136	0.569619	0.1366	0.0825	1.42449	0.0980016	4.10468	0.98434	0.594495	519.938	35.7706	1498.21	359.284	216.991
SUMATERA BARAT	KAB. SOLOK	BUKIT SUNDI	SIPSN	2022	Good	4	3.572	1303.94	0.197681	0.0136	0.569619	0.1366	0.0825	0.706115	0.0485792	2.03468	0.487935	0.29469	257.732	17.7314	742.658	178.096	107.562
SUMATERA BARAT	KAB. SOLOK	IX KOTO SUNGAI LASI	SIPSN	2022	Good	4	1.438	524.813	0.197681	0.0136	0.569619	0.1366	0.0825	0.284265	0.0195568	0.819113	0.196431	0.118635	103.757	7.13823	298.976	71.6972	43.3018
SUMATERA BARAT	KAB. SOLOK	KUBUNG	SIPSN	2022	Good	4	8.172	2982.95	0.197681	0.0136	0.569619	0.1366	0.0825	1.61545	0.111139	4.65493	1.1163	0.67419	589.638	40.5658	1699.05	407.448	246.079
SUMATERA BARAT	KAB. SOLOK	X KOTO SINGKARAK	SIPSN	2022	Good	4	4.587	1674.41	0.197681	0.0136	0.569619	0.1366	0.0825	0.906761	0.0623832	2.61284	0.626584	0.378427	330.968	22.7699	953.688	228.703	138.126
SUMATERA BARAT	KAB. SOLOK	X KOTO DIATAS	SIPSN	2022	Good	4	2.534	925.081	0.197681	0.0136	0.569619	0.1366	0.0825	0.500923	0.0344624	1.44342	0.346144	0.209055	182.837	12.5788	526.847	126.343	76.3051
SUMATERA BARAT	KAB. SOLOK	JUNJUNG SIRIH	SIPSN	2022	Good	4	1.712	624.736	0.197681	0.0136	0.569619	0.1366	0.0825	0.338429	0.0232832	0.975188	0.233859	0.14124	123.527	8.49837	355.944	85.3586	51.5526
SUMATERA BARAT	KAB. SOLOK	HILIRAN GUMANTI	SIPSN	2022	Good	4	2.451	894.567	0.197681	0.0136	0.569619	0.1366	0.0825	0.484515	0.0333336	1.39614	0.334807	0.202208	176.848	12.1668	509.59	122.204	73.8057
SUMATERA BARAT	KAB. SOLOK	TIGO LURAH	SIPSN	2022	Good	4	1.414	516.143	0.197681	0.0136	0.569619	0.1366	0.0825	0.27952	0.0192304	0.805442	0.193152	0.116655	102.025	7.0191	293.986	70.5006	42.5791
SUMATERA BARAT	KAB. SOLOK	DANAU KEMBAR	SIPSN	2022	Good	4	3.021	1102.61	0.197681	0.0136	0.569619	0.1366	0.0825	0.597193	0.0410856	1.72082	0.412669	0.249232	217.975	14.9962	628.099	150.624	90.9699
SUMATERA BARAT	KAB. SIJUNJUNG	TANJUNG GADANG	SIPSN	2022	Good	4	2.248	820.531	0.0593	0.0136	0.708	0.1366	0.0825	0.133306	0.0305728	1.59158	0.307077	0.18546	48.6568	11.1591	580.928	112.083	67.6929
SUMATERA BARAT	KAB. SIJUNJUNG	SIJUNJUNG	SIPSN	2022	Good	4	4.019	1466.87	0.0593	0.0136	0.708	0.1366	0.0825	0.238327	0.0546584	2.84545	0.548995	0.331568	86.9892	19.9503	1038.59	200.383	121.022
SUMATERA BARAT	KAB. SIJUNJUNG	IV NAGARI	SIPSN	2022	Good	4	1.289	470.32	0.0593	0.0136	0.708	0.1366	0.0825	0.0764377	0.0175304	0.912612	0.176077	0.106342	27.8998	6.3986	333.103	64.2683	38.815
SUMATERA BARAT	KAB. SIJUNJUNG	KAMANG BARU	SIPSN	2022	Good	4	4.242	1548.25	0.0593	0.0136	0.708	0.1366	0.0825	0.251551	0.0576912	3.00334	0.579457	0.349965	91.816	21.0573	1096.22	211.502	127.737
SUMATERA BARAT	KAB. SIJUNJUNG	LUBUAK TAROK	SIPSN	2022	Good	4	1.504	548.916	0.0593	0.0136	0.708	0.1366	0.0825	0.0891872	0.0204544	1.06483	0.205446	0.12408	32.5533	7.46586	388.664	74.9879	45.2892
SUMATERA BARAT	KAB. SIJUNJUNG	KOTO VII	SIPSN	2022	Good	4	3.18	1160.84	0.0593	0.0136	0.708	0.1366	0.0825	0.188574	0.043248	2.25144	0.434388	0.26235	68.8295	15.7855	821.776	158.552	95.7578
SUMATERA BARAT	KAB. SIJUNJUNG	SUMPUR KUDUS	SIPSN	2022	Good	4	2.187	798.143	0.0593	0.0136	0.708	0.1366	0.0825	0.129689	0.0297432	1.5484	0.298744	0.180427	47.3365	10.8563	565.165	109.042	65.856
SUMATERA BARAT	KAB. SIJUNJUNG	KUPITAN	SIPSN	2022	Good	4	1.077	393.22	0.0593	0.0136	0.708	0.1366	0.0825	0.0638661	0.0146472	0.762516	0.147118	0.0888525	23.3111	5.34623	278.318	53.6981	32.4312
SUMATERA BARAT	KAB. TANAH DATAR	X KOTO	SIPSN	2022	Good	4	2.689	981.497	0.0593	0.0136	0.708	0.1366	0.0825	0.159458	0.0365704	1.90381	0.367317	0.221843	58.2021	13.3482	694.891	134.071	80.9725
SUMATERA BARAT	KAB. TANAH DATAR	BATIPUH	SIPSN	2022	Good	4	1.918	700.117	0.0593	0.0136	0.708	0.1366	0.0825	0.113737	0.0260848	1.35794	0.261999	0.158235	41.5142	9.52095	495.65	95.6296	57.7558
SUMATERA BARAT	KAB. TANAH DATAR	RAMBATAN	SIPSN	2022	Good	4	2.325	848.738	0.0593	0.0136	0.708	0.1366	0.0825	0.137873	0.03162	1.6461	0.317595	0.191813	50.3235	11.5413	600.827	115.922	70.0116
SUMATERA BARAT	KAB. TANAH DATAR	LIMA KAUM	SIPSN	2022	Good	4	2.426	885.482	0.0593	0.0136	0.708	0.1366	0.0825	0.143862	0.0329936	1.71761	0.331392	0.200145	52.5096	12.0427	626.927	120.958	73.0529
SUMATERA BARAT	KAB. TANAH DATAR	TANJUNG EMAS	SIPSN	2022	Good	4	1.541	562.604	0.0593	0.0136	0.708	0.1366	0.0825	0.0913813	0.0209576	1.09103	0.210501	0.127133	33.3542	7.64952	398.225	76.8327	46.4034
SUMATERA BARAT	KAB. TANAH DATAR	LINTAU BUO	SIPSN	2022	Good	4	1.211	441.93	0.0593	0.0136	0.708	0.1366	0.0825	0.0718123	0.0164696	0.857388	0.165423	0.0999075	26.2115	6.0114	312.947	60.3792	36.4662
SUMATERA BARAT	KAB. TANAH DATAR	SUNGAYANG	SIPSN	2022	Good	4	1.157	422.358	0.0593	0.0136	0.708	0.1366	0.0825	0.0686101	0.0157352	0.819156	0.158046	0.0954525	25.0427	5.74335	298.992	57.6869	34.8402
SUMATERA BARAT	KAB. TANAH DATAR	SUNGAI TARAB	SIPSN	2022	Good	4	2.039	744.348	0.0593	0.0136	0.708	0.1366	0.0825	0.120913	0.0277304	1.44361	0.278527	0.168218	44.1331	10.1216	526.918	101.663	61.3994
SUMATERA BARAT	KAB. TANAH DATAR	PARIANGAN	SIPSN	2022	Good	4	1.279	466.878	0.0593	0.0136	0.708	0.1366	0.0825	0.0758447	0.0173944	0.905532	0.174711	0.105518	27.6833	6.34896	330.519	63.7697	38.5139
SUMATERA BARAT	KAB. TANAH DATAR	SALIMPAUNG	SIPSN	2022	Good	4	1.477	539.233	0.0593	0.0136	0.708	0.1366	0.0825	0.0875861	0.0200872	1.04572	0.201758	0.121853	31.9689	7.33183	381.686	73.6417	44.4762
SUMATERA BARAT	KAB. TANAH DATAR	PADANG GANTING	SIPSN	2022	Good	4	0.894	326.388	0.0593	0.0136	0.708	0.1366	0.0825	0.0530142	0.0121584	0.632952	0.12212	0.073755	19.3502	4.43782	231.027	44.5739	26.9206
SUMATERA BARAT	KAB. TANAH DATAR	TANJUANG BARU	SIPSN	2022	Good	4	0.895	326.699	0.0593	0.0136	0.708	0.1366	0.0825	0.0530735	0.012172	0.63366	0.122257	0.0738375	19.3718	4.44278	231.286	44.6238	26.9507
SUMATERA BARAT	KAB. TANAH DATAR	LINTAU BUO UTARA	SIPSN	2022	Good	4	2.34	854.181	0.0593	0.0136	0.708	0.1366	0.0825	0.138762	0.031824	1.65672	0.319644	0.19305	50.6481	11.6158	604.703	116.67	70.4633
SUMATERA BARAT	KAB. TANAH DATAR	BATIPUAH SELATAN	SIPSN	2022	Good	4	0.693	252.922	0.0593	0.0136	0.708	0.1366	0.0825	0.0410949	0.0094248	0.490644	0.0946638	0.0571725	14.9996	3.44005	179.085	34.5523	20.868
SUMATERA BARAT	KAB. PADANG PARIAMAN	LUBUK ALUNG	SIPSN	2022	Good	4	4.711	1719.55	0.0639057	0.0136	0.703394	0.1366	0.0825	0.30106	0.0640696	3.31369	0.643523	0.388658	109.887	23.3854	1209.5	234.886	141.86
SUMATERA BARAT	KAB. PADANG PARIAMAN	BATANG ANAI	SIPSN	2022	Good	4	5.262	1920.48	0.0639057	0.0136	0.703394	0.1366	0.0825	0.336272	0.0715632	3.70126	0.718789	0.434115	122.739	26.1206	1350.96	262.358	158.452
SUMATERA BARAT	KAB. PADANG PARIAMAN	NAN SABARIS	SIPSN	2022	Good	4	3.026	1104.38	0.0639057	0.0136	0.703394	0.1366	0.0825	0.193379	0.0411536	2.12847	0.413352	0.249645	70.5833	15.0211	776.892	150.873	91.1204
SUMATERA BARAT	KAB. PADANG PARIAMAN	2 X 11 ENAM LINGKUANG	SIPSN	2022	Good	4	1.869	682.091	0.0639057	0.0136	0.703394	0.1366	0.0825	0.11944	0.0254184	1.31464	0.255305	0.154193	43.5955	9.27772	479.845	93.1865	56.2803
SUMATERA BARAT	KAB. PADANG PARIAMAN	VII KOTO SUNGAI SARIK	SIPSN	2022	Good	4	3.637	1327.64	0.0639057	0.0136	0.703394	0.1366	0.0825	0.232425	0.0494632	2.55824	0.496814	0.300052	84.8352	18.0541	933.759	181.337	109.519
SUMATERA BARAT	KAB. PADANG PARIAMAN	V KOTO KAMPUNG DALAM	SIPSN	2022	Good	4	2.376	867.299	0.0639057	0.0136	0.703394	0.1366	0.0825	0.15184	0.0323136	1.67126	0.324562	0.19602	55.4216	11.7945	610.012	118.465	71.5473
SUMATERA BARAT	KAB. PADANG PARIAMAN	SUNGAI GARINGGING	SIPSN	2022	Good	4	3.222	1176.18	0.0639057	0.0136	0.703394	0.1366	0.0825	0.205904	0.0438192	2.26634	0.440125	0.265815	75.1551	15.994	827.213	160.646	97.0225
SUMATERA BARAT	KAB. PADANG PARIAMAN	SUNGAI LIMAU	SIPSN	2022	Good	4	2.977	1086.6	0.0639057	0.0136	0.703394	0.1366	0.0825	0.190247	0.0404872	2.094	0.406658	0.245603	69.4403	14.7778	764.312	148.43	89.6449
SUMATERA BARAT	KAB. PADANG PARIAMAN	IV KOTO AUR MALINTANG	SIPSN	2022	Good	4	2.12	773.828	0.0639057	0.0136	0.703394	0.1366	0.0825	0.13548	0.028832	1.4912	0.289592	0.1749	49.4503	10.5237	544.286	105.701	63.8385
SUMATERA BARAT	KAB. PADANG PARIAMAN	ULAKAN TAPAKIH	SIPSN	2022	Good	4	2.064	753.54	0.0639057	0.0136	0.703394	0.1366	0.0825	0.131901	0.0280704	1.45181	0.281942	0.17028	48.144	10.2457	529.909	102.909	62.1522
SUMATERA BARAT	KAB. PADANG PARIAMAN	SINTUAK TOBOH GADANG	SIPSN	2022	Good	4	1.98	722.737	0.0639057	0.0136	0.703394	0.1366	0.0825	0.126533	0.026928	1.39272	0.270468	0.16335	46.1847	9.82872	508.343	98.7208	59.6227
SUMATERA BARAT	KAB. PADANG PARIAMAN	PADANG SAGO	SIPSN	2022	Good	4	0.896	327.007	0.0639057	0.0136	0.703394	0.1366	0.0825	0.0572595	0.0121856	0.630241	0.122394	0.07392	20.8997	4.44774	230.038	44.6737	26.9808
SUMATERA BARAT	KAB. PADANG PARIAMAN	BATANG GASAN	SIPSN	2022	Good	4	1.133	413.681	0.0639057	0.0136	0.703394	0.1366	0.0825	0.0724052	0.0154088	0.796946	0.154768	0.0934725	26.4279	5.62421	290.885	56.4902	34.1175
SUMATERA BARAT	KAB. PADANG PARIAMAN	V KOTO TIMUR	SIPSN	2022	Good	4	1.491	544.363	0.0639057	0.0136	0.703394	0.1366	0.0825	0.0952835	0.0202776	1.04876	0.203671	0.123008	34.7785	7.40132	382.798	74.3398	44.8977
SUMATERA BARAT	KAB. PADANG PARIAMAN	2 X 11 KAYU TANAM	SIPSN	2022	Good	4	2.83	1032.79	0.0639057	0.0136	0.703394	0.1366	0.0825	0.180853	0.038488	1.99061	0.386578	0.233475	66.0114	14.0481	726.571	141.101	85.2184
SUMATERA BARAT	KAB. PADANG PARIAMAN	PATAMUAN	SIPSN	2022	Good	4	1.751	639.073	0.0639057	0.0136	0.703394	0.1366	0.0825	0.111899	0.0238136	1.23164	0.239187	0.144457	40.8431	8.69196	449.55	87.3031	52.727
SUMATERA BARAT	KAB. PADANG PARIAMAN	ENAM LINGKUNG	SIPSN	2022	Good	4	2.031	741.148	0.0639057	0.0136	0.703394	0.1366	0.0825	0.129793	0.0276216	1.42859	0.277435	0.167558	47.3743	10.0819	521.437	101.264	61.1585
SUMATERA BARAT	KAB. AGAM	TANJUNG MUTIARA	SIPSN	2022	Good	4	2.362	862.091	0.0593	0.0136	0.708	0.1366	0.0825	0.140067	0.0321232	1.6723	0.322649	0.194865	51.1243	11.725	610.388	117.767	71.1257
SUMATERA BARAT	KAB. AGAM	LUBUK BASUNG	SIPSN	2022	Good	4	5.838	2130.77	0.0593	0.0136	0.708	0.1366	0.0825	0.346193	0.0793968	4.1333	0.797471	0.481635	126.361	28.9798	1508.66	291.077	175.797
SUMATERA BARAT	KAB. AGAM	TANJUNG RAYA	SIPSN	2022	Good	4	2.676	976.909	0.0593	0.0136	0.708	0.1366	0.0825	0.158687	0.0363936	1.89461	0.365542	0.22077	57.9207	13.2837	691.532	133.423	80.5811
SUMATERA BARAT	KAB. AGAM	MATUR	SIPSN	2022	Good	4	1.376	502.402	0.0593	0.0136	0.708	0.1366	0.0825	0.0815968	0.0187136	0.974208	0.187962	0.11352	29.7828	6.83046	355.586	68.606	41.4348
SUMATERA BARAT	KAB. AGAM	IV KOTO	SIPSN	2022	Good	4	1.856	677.61	0.0593	0.0136	0.708	0.1366	0.0825	0.110061	0.0252416	1.31405	0.25353	0.15312	40.1722	9.21318	479.628	92.5383	55.8888
SUMATERA BARAT	KAB. AGAM	IV KOTO	SIPSN	2022	Good	4	1.856	677.61	0.0593	0.0136	0.708	0.1366	0.0825	0.110061	0.0252416	1.31405	0.25353	0.15312	40.1722	9.21318	479.628	92.5383	55.8888
SUMATERA BARAT	KAB. AGAM	BANUHAMPU	SIPSN	2022	Good	4	2.691	982.355	0.0593	0.0136	0.708	0.1366	0.0825	0.159576	0.0365976	1.90523	0.367591	0.222007	58.2453	13.3581	695.408	134.171	81.0327
SUMATERA BARAT	KAB. AGAM	AMPEK ANGKEK	SIPSN	2022	Good	4	3.163	1154.58	0.0593	0.0136	0.708	0.1366	0.0825	0.187566	0.0430168	2.2394	0.432066	0.260947	68.4616	15.7011	817.382	157.704	95.2458
SUMATERA BARAT	KAB. AGAM	BASO	SIPSN	2022	Good	4	2.64	963.706	0.0593	0.0136	0.708	0.1366	0.0825	0.156552	0.035904	1.86912	0.360624	0.2178	57.1415	13.105	682.229	131.628	79.497
SUMATERA BARAT	KAB. AGAM	TILATANG KAMANG	SIPSN	2022	Good	4	2.639	963.09	0.0593	0.0136	0.708	0.1366	0.0825	0.156493	0.0358904	1.86841	0.360487	0.217717	57.1198	13.1	681.97	131.578	79.4669
SUMATERA BARAT	KAB. AGAM	PALUPUH	SIPSN	2022	Good	4	1.093	398.783	0.0593	0.0136	0.708	0.1366	0.0825	0.0648149	0.0148648	0.773844	0.149304	0.0901725	23.6574	5.42565	282.453	54.4959	32.913
SUMATERA BARAT	KAB. AGAM	PALEMBAYAN	SIPSN	2022	Good	4	2.481	905.655	0.0593	0.0136	0.708	0.1366	0.0825	0.147123	0.0337416	1.75655	0.338905	0.204682	53.7	12.3157	641.14	123.7	74.7091
SUMATERA BARAT	KAB. AGAM	SUNGAI PUA	SIPSN	2022	Good	4	1.913	698.134	0.0593	0.0136	0.708	0.1366	0.0825	0.113441	0.0260168	1.3544	0.261316	0.157823	41.4059	9.49613	494.357	95.3803	57.6052
SUMATERA BARAT	KAB. AGAM	AMPEK NAGARI	SIPSN	2022	Good	4	2.138	780.228	0.0593	0.0136	0.708	0.1366	0.0825	0.126783	0.0290768	1.5137	0.292051	0.176385	46.2759	10.613	552.502	106.599	64.3805
SUMATERA BARAT	KAB. AGAM	CANDUNG	SIPSN	2022	Good	4	1.793	654.621	0.0593	0.0136	0.708	0.1366	0.0825	0.106325	0.0243848	1.26944	0.244924	0.147923	38.8086	8.90045	463.347	89.3972	53.9917
SUMATERA BARAT	KAB. AGAM	KAMANG MAGEK	SIPSN	2022	Good	4	1.561	569.752	0.0593	0.0136	0.708	0.1366	0.0825	0.0925673	0.0212296	1.10519	0.213233	0.128782	33.7871	7.7488	403.394	77.8299	47.0056
SUMATERA BARAT	KAB. AGAM	MALALAK	SIPSN	2022	Good	4	0.75	273.664	0.0593	0.0136	0.708	0.1366	0.0825	0.044475	0.0102	0.531	0.10245	0.061875	16.2334	3.723	193.815	37.3942	22.5844
SUMATERA BARAT	KAB. LIMA PULUH KOTA	SULIKI	SIPSN	2022	Good	4	1.156	422.009	0.0593	0.0136	0.708	0.1366	0.0825	0.0685508	0.0157216	0.818448	0.15791	0.09537	25.021	5.73838	298.734	57.637	34.81
SUMATERA BARAT	KAB. LIMA PULUH KOTA	GUGUAK	SIPSN	2022	Good	4	2.794	1019.82	0.0593	0.0136	0.708	0.1366	0.0825	0.165684	0.0379984	1.97815	0.38166	0.230505	60.4747	13.8694	722.025	139.306	84.1343
SUMATERA BARAT	KAB. LIMA PULUH KOTA	PAYAKUMBUH	SIPSN	2022	Good	4	2.898	1057.59	0.0593	0.0136	0.708	0.1366	0.0825	0.171851	0.0394128	2.05178	0.395867	0.239085	62.7258	14.3857	748.901	144.491	87.266
SUMATERA BARAT	KAB. LIMA PULUH KOTA	LUAK	SIPSN	2022	Good	4	2.205	804.862	0.0593	0.0136	0.708	0.1366	0.0825	0.130756	0.029988	1.56114	0.301203	0.181913	47.7261	10.9456	569.816	109.939	66.3981
SUMATERA BARAT	KAB. LIMA PULUH KOTA	HARAU	SIPSN	2022	Good	4	4.261	1555.3	0.0593	0.0136	0.708	0.1366	0.0825	0.252677	0.0579496	3.01679	0.582053	0.351533	92.2272	21.1516	1101.13	212.449	128.309
SUMATERA BARAT	KAB. LIMA PULUH KOTA	PANGKALAN KOTO BARU	SIPSN	2022	Good	4	2.26	824.967	0.0593	0.0136	0.708	0.1366	0.0825	0.134018	0.030736	1.60008	0.308716	0.18645	48.9166	11.2186	584.029	112.681	68.0542
SUMATERA BARAT	KAB. LIMA PULUH KOTA	KAPUR IX	SIPSN	2022	Good	4	2.152	785.563	0.0593	0.0136	0.708	0.1366	0.0825	0.127614	0.0292672	1.52362	0.293963	0.17754	46.579	10.6825	556.12	107.297	64.8021
SUMATERA BARAT	KAB. LIMA PULUH KOTA	GUNUANG OMEH	SIPSN	2022	Good	4	1.099	400.987	0.0593	0.0136	0.708	0.1366	0.0825	0.0651707	0.0149464	0.778092	0.150123	0.0906675	23.7873	5.45544	284.004	54.795	33.0936
SUMATERA BARAT	KAB. LIMA PULUH KOTA	LAREH SAGO HALABAN	SIPSN	2022	Good	4	3.028	1105.3	0.0593	0.0136	0.708	0.1366	0.0825	0.17956	0.0411808	2.14382	0.413625	0.24981	65.5395	15.031	782.496	150.973	91.1806
SUMATERA BARAT	KAB. LIMA PULUH KOTA	SITUJUAH LIMO NAGARI	SIPSN	2022	Good	4	1.81	660.657	0.0593	0.0136	0.708	0.1366	0.0825	0.107333	0.024616	1.28148	0.247246	0.149325	39.1765	8.98484	467.74	90.2448	54.5036
SUMATERA BARAT	KAB. LIMA PULUH KOTA	MUNGKA	SIPSN	2022	Good	4	2.099	766.124	0.0593	0.0136	0.708	0.1366	0.0825	0.124471	0.0285464	1.48609	0.286723	0.173168	45.4318	10.4194	542.424	104.654	63.2061
SUMATERA BARAT	KAB. LIMA PULUH KOTA	BUKIK BARISAN	SIPSN	2022	Good	4	1.803	658.186	0.0593	0.0136	0.708	0.1366	0.0825	0.106918	0.0245208	1.27652	0.24629	0.148748	39.025	8.95009	465.931	89.8958	54.2928
SUMATERA BARAT	KAB. LIMA PULUH KOTA	AKABILURU	SIPSN	2022	Good	4	2.265	826.772	0.0593	0.0136	0.708	0.1366	0.0825	0.134314	0.030804	1.60362	0.309399	0.186863	49.0248	11.2435	585.321	112.931	68.2048
SUMATERA BARAT	KAB. PASAMAN	BONJOL	SIPSN	2022	Good	4	1.53	558.494	0.0593	0.0136	0.708	0.1366	0.0825	0.090729	0.020808	1.08324	0.208998	0.126225	33.1161	7.59492	395.383	76.2843	46.0721
SUMATERA BARAT	KAB. PASAMAN	LUBUK SIKAPING	SIPSN	2022	Good	4	2.975	1085.75	0.0593	0.0136	0.708	0.1366	0.0825	0.176418	0.04046	2.1063	0.406385	0.245438	64.3924	14.7679	768.799	148.331	89.5847
SUMATERA BARAT	KAB. PASAMAN	PANTI	SIPSN	2022	Good	4	1.986	724.734	0.0593	0.0136	0.708	0.1366	0.0825	0.11777	0.0270096	1.40609	0.271288	0.163845	42.986	9.8585	513.222	99.02	59.8034
SUMATERA BARAT	KAB. PASAMAN	MAPAT TUNGGUL	SIPSN	2022	Good	4	0.565	206.165	0.0593	0.0136	0.708	0.1366	0.0825	0.0335045	0.007684	0.40002	0.077179	0.0466125	12.2291	2.80466	146.007	28.1703	17.0136
SUMATERA BARAT	KAB. PASAMAN	DUO KOTO	SIPSN	2022	Good	4	1.648	601.502	0.0593	0.0136	0.708	0.1366	0.0825	0.0977264	0.0224128	1.16678	0.225117	0.13596	35.6701	8.18067	425.876	82.1676	49.6254
SUMATERA BARAT	KAB. PASAMAN	TIGO NAGARI	SIPSN	2022	Good	4	1.755	640.49	0.0593	0.0136	0.708	0.1366	0.0825	0.104071	0.023868	1.24254	0.239733	0.144787	37.9861	8.71182	453.527	87.5025	52.8474
SUMATERA BARAT	KAB. PASAMAN	RAO	SIPSN	2022	Good	4	1.492	544.54	0.0593	0.0136	0.708	0.1366	0.0825	0.0884756	0.0202912	1.05634	0.203807	0.12309	32.2936	7.40629	385.563	74.3896	44.9278
SUMATERA BARAT	KAB. PASAMAN	MAPAT TUNGGUL SELATAN	SIPSN	2022	Good	4	0.547	199.626	0.0593	0.0136	0.708	0.1366	0.0825	0.0324371	0.0074392	0.387276	0.0747202	0.0451275	11.8395	2.71531	141.356	27.2729	16.4715
SUMATERA BARAT	KAB. PASAMAN	SIMPANG ALAHAN MATI	SIPSN	2022	Good	4	0.722	263.398	0.0593	0.0136	0.708	0.1366	0.0825	0.0428146	0.0098192	0.511176	0.0986252	0.059565	15.6273	3.58401	186.579	35.9982	21.7412
SUMATERA BARAT	KAB. PASAMAN	PADANG GELUGUR	SIPSN	2022	Good	4	1.896	692.099	0.0593	0.0136	0.708	0.1366	0.0825	0.112433	0.0257856	1.34237	0.258994	0.15642	41.038	9.41174	489.964	94.5327	57.0933
SUMATERA BARAT	KAB. PASAMAN	RAO UTARA	SIPSN	2022	Good	4	0.706	257.545	0.0593	0.0136	0.708	0.1366	0.0825	0.0418658	0.0096016	0.499848	0.0964396	0.058245	15.281	3.50458	182.445	35.2005	21.2594
SUMATERA BARAT	KAB. PASAMAN	RAO SELATAN	SIPSN	2022	Good	4	1.526	556.89	0.0593	0.0136	0.708	0.1366	0.0825	0.0904918	0.0207536	1.08041	0.208452	0.125895	33.0295	7.57506	394.349	76.0848	45.9517
SUMATERA BARAT	KAB. KEPULAUAN MENTAWAI	PAGAI UTARA	Average of Province	Filling Data	Worst	1	0.602	219.688	0.0593	0.0136	0.708	0.1366	0.0825	0.0356986	0.0081872	0.426216	0.0822332	0.049665	13.03	2.98833	155.569	30.0151	18.1277
SUMATERA BARAT	KAB. KEPULAUAN MENTAWAI	SIPORA SELATAN	Average of Province	Filling Data	Worst	1	0.978	356.803	0.0593	0.0136	0.708	0.1366	0.0825	0.0579954	0.0133008	0.692424	0.133595	0.080685	21.1683	4.85479	252.735	48.7621	29.45
SUMATERA BARAT	KAB. KEPULAUAN MENTAWAI	SIBERUT SELATAN	Average of Province	Filling Data	Worst	1	0.979	357.182	0.0593	0.0136	0.708	0.1366	0.0825	0.0580547	0.0133144	0.693132	0.133731	0.0807675	21.19	4.85976	252.993	48.812	29.4801
SUMATERA BARAT	KAB. KEPULAUAN MENTAWAI	SIBERUT UTARA	Average of Province	Filling Data	Worst	1	0.819	299.092	0.0593	0.0136	0.708	0.1366	0.0825	0.0485667	0.0111384	0.579852	0.111875	0.0675675	17.7268	4.06552	211.646	40.8345	24.6621
SUMATERA BARAT	KAB. KEPULAUAN MENTAWAI	SIBERUT BARAT	Average of Province	Filling Data	Worst	1	0.745	272.096	0.0593	0.0136	0.708	0.1366	0.0825	0.0441785	0.010132	0.52746	0.101767	0.0614625	16.1252	3.69818	192.523	37.145	22.4338
SUMATERA BARAT	KAB. KEPULAUAN MENTAWAI	SIBERUT BARAT DAYA	Average of Province	Filling Data	Worst	1	0.701	255.74	0.0593	0.0136	0.708	0.1366	0.0825	0.0415693	0.0095336	0.496308	0.0957566	0.0578325	15.1728	3.47976	181.152	34.9512	21.1089
SUMATERA BARAT	KAB. KEPULAUAN MENTAWAI	SIBERUT TENGAH	Average of Province	Filling Data	Worst	1	0.722	263.384	0.0593	0.0136	0.708	0.1366	0.0825	0.0428146	0.0098192	0.511176	0.0986252	0.059565	15.6273	3.58401	186.579	35.9982	21.7412
SUMATERA BARAT	KAB. KEPULAUAN MENTAWAI	SIPORA UTARA	Average of Province	Filling Data	Worst	1	1.229	448.638	0.0593	0.0136	0.708	0.1366	0.0825	0.0728797	0.0167144	0.870132	0.167881	0.101393	26.6011	6.10076	317.598	61.2767	37.0083
SUMATERA BARAT	KAB. KEPULAUAN MENTAWAI	SIKAKAP	Average of Province	Filling Data	Worst	1	1.007	367.65	0.0593	0.0136	0.708	0.1366	0.0825	0.0597151	0.0136952	0.712956	0.137556	0.0830775	21.796	4.99875	260.229	50.208	30.3233
SUMATERA BARAT	KAB. KEPULAUAN MENTAWAI	PAGAI SELATAN	Average of Province	Filling Data	Worst	1	0.95	346.714	0.0593	0.0136	0.708	0.1366	0.0825	0.056335	0.01292	0.6726	0.12977	0.078375	20.5623	4.7158	245.499	47.3661	28.6069
SUMATERA BARAT	KAB. DHARMASRAYA	KOTO BARU	SIPSN	2022	Good	4	2.722	993.56	0.0593	0.0136	0.708	0.1366	0.0825	0.161415	0.0370192	1.92718	0.371825	0.224565	58.9163	13.512	703.419	135.716	81.9662
SUMATERA BARAT	KAB. DHARMASRAYA	PULAU PUNJUNG	SIPSN	2022	Good	4	3.751	1368.95	0.0593	0.0136	0.708	0.1366	0.0825	0.222434	0.0510136	2.65571	0.512387	0.309457	81.1885	18.62	969.333	187.021	112.952
SUMATERA BARAT	KAB. DHARMASRAYA	SUNGAI RUMBAI	SIPSN	2022	Good	4	1.884	687.728	0.0593	0.0136	0.708	0.1366	0.0825	0.111721	0.0256224	1.33387	0.257354	0.15543	40.7782	9.35218	486.863	93.9344	56.732
SUMATERA BARAT	KAB. DHARMASRAYA	SITIUNG	SIPSN	2022	Good	4	2.356	860.093	0.0593	0.0136	0.708	0.1366	0.0825	0.139711	0.0320416	1.66805	0.32183	0.19437	50.9944	11.6952	608.838	117.468	70.945
SUMATERA BARAT	KAB. DHARMASRAYA	SEMBILAN KOTO	SIPSN	2022	Good	4	0.77	280.966	0.0593	0.0136	0.708	0.1366	0.0825	0.045661	0.010472	0.54516	0.105182	0.063525	16.6663	3.82228	198.983	38.3914	23.1866
SUMATERA BARAT	KAB. DHARMASRAYA	TIMPEH	SIPSN	2022	Good	4	1.437	524.677	0.0593	0.0136	0.708	0.1366	0.0825	0.0852141	0.0195432	1.0174	0.196294	0.118553	31.1031	7.13327	371.35	71.6474	43.2717
SUMATERA BARAT	KAB. DHARMASRAYA	KOTO SALAK	SIPSN	2022	Good	4	1.473	537.812	0.0593	0.0136	0.708	0.1366	0.0825	0.0873489	0.0200328	1.04288	0.201212	0.121523	31.8823	7.31197	380.653	73.4423	44.3557
SUMATERA BARAT	KAB. DHARMASRAYA	TIUMANG	SIPSN	2022	Good	4	1.104	403.09	0.0593	0.0136	0.708	0.1366	0.0825	0.0654672	0.0150144	0.781632	0.150806	0.09108	23.8955	5.48026	285.296	55.0443	33.2442
SUMATERA BARAT	KAB. DHARMASRAYA	PADANG LAWEH	SIPSN	2022	Good	4	0.539	196.754	0.0593	0.0136	0.708	0.1366	0.0825	0.0319627	0.0073304	0.381612	0.0736274	0.0444675	11.6664	2.6756	139.288	26.874	16.2306
SUMATERA BARAT	KAB. DHARMASRAYA	ASAM JUJUHAN	SIPSN	2022	Good	4	0.719	262.338	0.0593	0.0136	0.708	0.1366	0.0825	0.0426367	0.0097784	0.509052	0.0982154	0.0593175	15.5624	3.56912	185.804	35.8486	21.6509
SUMATERA BARAT	KAB. DHARMASRAYA	KOTO BESAR	SIPSN	2022	Good	4	2.267	827.494	0.0593	0.0136	0.708	0.1366	0.0825	0.134433	0.0308312	1.60504	0.309672	0.187028	49.0681	11.2534	585.838	113.03	68.265
SUMATERA BARAT	KAB. SOLOK SELATAN	SANGIR	SIPSN	2022	Good	4	5.281	1927.64	0.0593	0.0136	0.708	0.1366	0.0825	0.313163	0.0718216	3.73895	0.721385	0.435682	114.305	26.2149	1364.72	263.305	159.024
SUMATERA BARAT	KAB. SOLOK SELATAN	SUNGAI PAGU	SIPSN	2022	Good	4	3.57	1303.06	0.0593	0.0136	0.708	0.1366	0.0825	0.211701	0.048552	2.52756	0.487662	0.294525	77.2709	17.7215	922.559	177.997	107.502
SUMATERA BARAT	KAB. SOLOK SELATAN	KOTO PARIK GADANG DIATEH	SIPSN	2022	Good	4	3.067	1119.52	0.0593	0.0136	0.708	0.1366	0.0825	0.181873	0.0417112	2.17144	0.418952	0.253028	66.3837	15.2246	792.574	152.918	92.355
SUMATERA BARAT	KAB. SOLOK SELATAN	SANGIR JUJUAN	SIPSN	2022	Good	4	1.555	567.565	0.0593	0.0136	0.708	0.1366	0.0825	0.0922115	0.021148	1.10094	0.212413	0.128287	33.6572	7.71902	401.843	77.5307	46.8249
SUMATERA BARAT	KAB. SOLOK SELATAN	SANGIR BATANG HARI	SIPSN	2022	Good	4	1.784	651.029	0.0593	0.0136	0.708	0.1366	0.0825	0.105791	0.0242624	1.26307	0.243694	0.14718	38.6138	8.85578	461.021	88.9485	53.7207
SUMATERA BARAT	KAB. SOLOK SELATAN	PAUH DUO	SIPSN	2022	Good	4	2.129	777.206	0.0593	0.0136	0.708	0.1366	0.0825	0.12625	0.0289544	1.50733	0.290821	0.175643	46.0811	10.5684	550.176	106.15	64.1095
SUMATERA BARAT	KAB. SOLOK SELATAN	SANGIR BALAI JANGGO	SIPSN	2022	Good	4	1.817	663.101	0.0593	0.0136	0.708	0.1366	0.0825	0.107748	0.0247112	1.28644	0.248202	0.149902	39.3281	9.01959	469.549	90.5938	54.7144
SUMATERA BARAT	KAB. PASAMAN BARAT	SUNGAI BEREMAS	SIPSN	2022	Good	4	2.201	803.295	0.0593	0.0136	0.708	0.1366	0.0825	0.130519	0.0299336	1.55831	0.300657	0.181583	47.6395	10.9258	568.782	109.74	66.2776
SUMATERA BARAT	KAB. PASAMAN BARAT	LEMBAH MELINTANG	SIPSN	2022	Good	4	3.932	1435.1	0.0593	0.0136	0.708	0.1366	0.0825	0.233168	0.0534752	2.78386	0.537111	0.32439	85.1062	19.5184	1016.11	196.046	118.402
SUMATERA BARAT	KAB. PASAMAN BARAT	PASAMAN	SIPSN	2022	Good	4	6.054	2209.84	0.0593	0.0136	0.708	0.1366	0.0825	0.359002	0.0823344	4.28623	0.826976	0.499455	131.036	30.0521	1564.47	301.846	182.301
SUMATERA BARAT	KAB. PASAMAN BARAT	TALAMAU	SIPSN	2022	Good	4	2.379	868.505	0.0593	0.0136	0.708	0.1366	0.0825	0.141075	0.0323544	1.68433	0.324971	0.196268	51.4923	11.8094	614.781	118.615	71.6376
SUMATERA BARAT	KAB. PASAMAN BARAT	KINALI	SIPSN	2022	Good	4	5.604	2045.44	0.0593	0.0136	0.708	0.1366	0.0825	0.332317	0.0762144	3.96763	0.765506	0.46233	121.296	27.8183	1448.19	279.41	168.75
SUMATERA BARAT	KAB. PASAMAN BARAT	GUNUNG TULEH	SIPSN	2022	Good	4	1.984	724.053	0.0593	0.0136	0.708	0.1366	0.0825	0.117651	0.0269824	1.40467	0.271014	0.16368	42.9427	9.84858	512.705	98.9203	59.7432
SUMATERA BARAT	KAB. PASAMAN BARAT	RANAH BATAHAN	SIPSN	2022	Good	4	2.215	808.361	0.0593	0.0136	0.708	0.1366	0.0825	0.13135	0.030124	1.56822	0.302569	0.182737	47.9426	10.9953	572.4	110.438	66.6992
SUMATERA BARAT	KAB. PASAMAN BARAT	KOTO BALINGKA	SIPSN	2022	Good	4	2.438	889.71	0.0593	0.0136	0.708	0.1366	0.0825	0.144573	0.0331568	1.7261	0.333031	0.201135	52.7693	12.1022	630.028	121.556	73.4143
SUMATERA BARAT	KAB. PASAMAN BARAT	SUNGAI AUR	SIPSN	2022	Good	4	2.767	1009.94	0.0593	0.0136	0.708	0.1366	0.0825	0.164083	0.0376312	1.95904	0.377972	0.228277	59.8903	13.7354	715.048	137.96	83.3213
SUMATERA BARAT	KAB. PASAMAN BARAT	LUHAK NAN DUO	SIPSN	2022	Good	4	3.547	1294.66	0.0593	0.0136	0.708	0.1366	0.0825	0.210337	0.0482392	2.51128	0.48452	0.292628	76.773	17.6073	916.616	176.85	106.809
SUMATERA BARAT	KAB. PASAMAN BARAT	SASAK RANAH PASISIE	SIPSN	2022	Good	4	1.196	436.714	0.0593	0.0136	0.708	0.1366	0.0825	0.0709228	0.0162656	0.846768	0.163374	0.09867	25.8868	5.93694	309.07	59.6314	36.0145
SUMATERA BARAT	KOTA PADANG	PADANG SELATAN	SIPSN	2022	Good	4	8.583	3132.86	0.7	0	0.25	0.03	0.02	6.0081	0	2.14575	0.25749	0.17166	2192.96	0	783.199	93.9839	62.6559
SUMATERA BARAT	KOTA PADANG	PADANG TIMUR	SIPSN	2022	Good	4	11.194	4085.67	0.7	0	0.25	0.03	0.02	7.8358	0	2.7985	0.33582	0.22388	2860.07	0	1021.45	122.574	81.7162
SUMATERA BARAT	KOTA PADANG	PADANG BARAT	SIPSN	2022	Good	4	6.037	2203.51	0.7	0	0.25	0.03	0.02	4.2259	0	1.50925	0.18111	0.12074	1542.45	0	550.876	66.1051	44.0701
SUMATERA BARAT	KOTA PADANG	PADANG UTARA	SIPSN	2022	Good	4	8.157	2977.43	0.7	0	0.25	0.03	0.02	5.7099	0	2.03925	0.24471	0.16314	2084.11	0	744.326	89.3191	59.5461
SUMATERA BARAT	KOTA PADANG	BUNGUS TELUK KABUNG	SIPSN	2022	Good	4	3.903	1424.58	0.7	0	0.25	0.03	0.02	2.7321	0	0.97575	0.11709	0.07806	997.216	0	356.149	42.7379	28.4919
SUMATERA BARAT	KOTA PADANG	LUBUK BEGALUNG	SIPSN	2022	Good	4	17.088	6237.04	0.7	0	0.25	0.03	0.02	11.9616	0	4.272	0.51264	0.34176	4365.98	0	1559.28	187.114	124.742
SUMATERA BARAT	KOTA PADANG	LUBUK KILANGAN	SIPSN	2022	Good	4	8.017	2926.14	0.7	0	0.25	0.03	0.02	5.6119	0	2.00425	0.24051	0.16034	2048.34	0	731.551	87.7861	58.5241
SUMATERA BARAT	KOTA PADANG	PAUH	SIPSN	2022	Good	4	8.725	3184.55	0.7	0	0.25	0.03	0.02	6.1075	0	2.18125	0.26175	0.1745	2229.24	0	796.156	95.5387	63.6925
SUMATERA BARAT	KOTA PADANG	KURANJI	SIPSN	2022	Good	4	20.566	7506.69	0.7	0	0.25	0.03	0.02	14.3962	0	5.1415	0.61698	0.41132	5254.61	0	1876.65	225.198	150.132
SUMATERA BARAT	KOTA PADANG	NANGGALO	SIPSN	2022	Good	4	8.334	3041.89	0.7	0	0.25	0.03	0.02	5.8338	0	2.0835	0.25002	0.16668	2129.34	0	760.477	91.2573	60.8382
SUMATERA BARAT	KOTA PADANG	KOTO TANGAH	SIPSN	2022	Good	4	27.807	10149.4	0.7	0	0.25	0.03	0.02	19.4649	0	6.95175	0.83421	0.55614	7104.69	0	2537.39	304.487	202.991
SUMATERA BARAT	KOTA SOLOK	LUBUK SIKARAH	SIPSN	2022	Good	4	6.045	2206.5	0.8	0	0.18	0.01	0.01	4.836	0	1.0881	0.06045	0.06045	1765.14	0	397.156	22.0643	22.0643
SUMATERA BARAT	KOTA SOLOK	TANJUNG HARAPAN	SIPSN	2022	Good	4	4.932	1800.01	0.8	0	0.18	0.01	0.01	3.9456	0	0.88776	0.04932	0.04932	1440.14	0	324.032	18.0018	18.0018
SUMATERA BARAT	KOTA SAWAHLUNTO	LEMBAH SEGAR	SIPSN	2022	Good	4	0.776	283.367	0.53	0.03	0.42	0.01	0.01	0.41128	0.02328	0.32592	0.00776	0.00776	150.117	8.4972	118.961	2.8324	2.8324
SUMATERA BARAT	KOTA SAWAHLUNTO	BARANGIN	SIPSN	2022	Good	4	1.161	423.591	0.53	0.03	0.42	0.01	0.01	0.61533	0.03483	0.48762	0.01161	0.01161	224.595	12.7129	177.981	4.23765	4.23765
SUMATERA BARAT	KOTA SAWAHLUNTO	SILUNGKANG	SIPSN	2022	Good	4	0.653	238.471	0.53	0.03	0.42	0.01	0.01	0.34609	0.01959	0.27426	0.00653	0.00653	126.323	7.15035	100.105	2.38345	2.38345
SUMATERA BARAT	KOTA SAWAHLUNTO	TALAWI	SIPSN	2022	Good	4	1.148	418.941	0.53	0.03	0.42	0.01	0.01	0.60844	0.03444	0.48216	0.01148	0.01148	222.081	12.5706	175.988	4.1902	4.1902
SUMATERA BARAT	KOTA PADANG PANJANG	PADANG PANJANG TIMUR	SIPSN	2022	Good	4	4.143	1512.21	0.895022	0	0.0749782	0.015	0.015	3.70808	0	0.310635	0.062145	0.062145	1353.45	0	113.382	22.6829	22.6829
SUMATERA BARAT	KOTA PADANG PANJANG	PADANG PANJANG BARAT	SIPSN	2022	Good	4	5.499	2007	0.895022	0	0.0749782	0.015	0.015	4.92172	0	0.412305	0.082485	0.082485	1796.43	0	150.491	30.107	30.107
SUMATERA BARAT	KOTA BUKITTINGGI	GUGUAK PANJANG	Sampling	2022	Best	5	9.727	3550.47	0.890056	0	0.0799445	0.015	0.015	8.65757	0	0.77762	0.145905	0.145905	3160.01	0	283.831	53.2553	53.2553
SUMATERA BARAT	KOTA BUKITTINGGI	MANDIANGIN KOTO SELAYAN	Sampling	2022	Best	5	11.916	4349.2	0.890056	0	0.0799445	0.015	0.015	10.6059	0	0.952618	0.17874	0.17874	3871.15	0	347.706	65.2401	65.2401
SUMATERA BARAT	KOTA BUKITTINGGI	AUR BIRUGO TIGO BALEH	Sampling	2022	Best	5	6.103	2227.57	0.890056	0	0.0799445	0.015	0.015	5.43201	0	0.487901	0.091545	0.091545	1982.68	0	178.084	33.4139	33.4139
SUMATERA BARAT	KOTA PAYAKUMBUH	PAYAKUMBUH BARAT	SIPSN	2022	Good	4	7.373	2691.25	0.73	0	0.25	0.01	0.01	5.38229	0	1.84325	0.07373	0.07373	1964.54	0	672.786	26.9115	26.9115
SUMATERA BARAT	KOTA PAYAKUMBUH	PAYAKUMBUH UTARA	SIPSN	2022	Good	4	4.482	1635.94	0.73	0	0.25	0.01	0.01	3.27186	0	1.1205	0.04482	0.04482	1194.23	0	408.983	16.3593	16.3593
SUMATERA BARAT	KOTA PAYAKUMBUH	PAYAKUMBUH TIMUR	SIPSN	2022	Good	4	4.036	1473.29	0.73	0	0.25	0.01	0.01	2.94628	0	1.009	0.04036	0.04036	1075.39	0	368.285	14.7314	14.7314
SUMATERA BARAT	KOTA PAYAKUMBUH	LAMPOSI TIGO NAGORI	SIPSN	2022	Good	4	1.588	579.8	0.73	0	0.25	0.01	0.01	1.15924	0	0.397	0.01588	0.01588	423.123	0	144.905	5.7962	5.7962
SUMATERA BARAT	KOTA PAYAKUMBUH	PAYAKUMBUH SELATAN	SIPSN	2022	Good	4	1.64	598.607	0.73	0	0.25	0.01	0.01	1.1972	0	0.41	0.0164	0.0164	436.978	0	149.65	5.986	5.986
SUMATERA BARAT	KOTA PARIAMAN	PARIAMAN TENGAH	SIPSN	2022	Good	4	2.588	944.502	0.4	0.05	0.5	0.025	0.025	1.0352	0.1294	1.294	0.0647	0.0647	377.848	47.231	472.31	23.6155	23.6155
SUMATERA BARAT	KOTA PARIAMAN	PARIAMAN UTARA	SIPSN	2022	Good	4	1.919	700.542	0.4	0.05	0.5	0.025	0.025	0.7676	0.09595	0.9595	0.047975	0.047975	280.174	35.0218	350.218	17.5109	17.5109
SUMATERA BARAT	KOTA PARIAMAN	PARIAMAN SELATAN	SIPSN	2022	Good	4	1.625	593.292	0.4	0.05	0.5	0.025	0.025	0.65	0.08125	0.8125	0.040625	0.040625	237.25	29.6562	296.562	14.8281	14.8281
SUMATERA BARAT	KOTA PARIAMAN	PARIAMAN TIMUR	SIPSN	2022	Good	4	1.564	570.72	0.4	0.05	0.5	0.025	0.025	0.6256	0.0782	0.782	0.0391	0.0391	228.344	28.543	285.43	14.2715	14.2715
RIAU	KAB. KAMPAR	BANGKINANG KOTA	SIPSN	2020	Bad	2	3.117	1137.85	0.1883	0.0115	0.7795	0.0095	0.0112	0.586931	0.0358455	2.4297	0.0296115	0.0349104	214.23	13.0836	886.841	10.8082	12.7423
RIAU	KAB. KAMPAR	KAMPAR	SIPSN	2020	Bad	2	4.25	1551.16	0.1883	0.0115	0.7795	0.0095	0.0112	0.800275	0.048875	3.31288	0.040375	0.0476	292.1	17.8394	1209.2	14.7369	17.374
RIAU	KAB. KAMPAR	TAMBANG	SIPSN	2020	Bad	2	6.899	2518.03	0.1883	0.0115	0.7795	0.0095	0.0112	1.29908	0.0793385	5.37777	0.0655405	0.0772688	474.165	28.9586	1962.89	23.9223	28.2031
RIAU	KAB. KAMPAR	XIII KOTO KAMPAR	SIPSN	2020	Bad	2	1.949	711.301	0.1883	0.0115	0.7795	0.0095	0.0112	0.366997	0.0224135	1.51925	0.0185155	0.0218288	133.954	8.18093	554.525	6.75816	7.96751
RIAU	KAB. KAMPAR	KUOK	SIPSN	2020	Bad	2	2.111	770.608	0.1883	0.0115	0.7795	0.0095	0.0112	0.397501	0.0242765	1.64552	0.0200545	0.0236432	145.088	8.86092	600.616	7.31989	8.62977
RIAU	KAB. KAMPAR	SIAK HULU	SIPSN	2020	Bad	2	7.501	2737.85	0.1883	0.0115	0.7795	0.0095	0.0112	1.41244	0.0862615	5.84703	0.0712595	0.0840112	515.54	31.4854	2134.17	26.0097	30.6641
RIAU	KAB. KAMPAR	KAMPAR KIRI	SIPSN	2020	Bad	2	2.841	1036.96	0.1883	0.0115	0.7795	0.0095	0.0112	0.53496	0.0326715	2.21456	0.0269895	0.0318192	195.261	11.9251	808.314	9.85117	11.614
RIAU	KAB. KAMPAR	KAMPAR KIRI HILIR	SIPSN	2020	Bad	2	1.126	411.094	0.1883	0.0115	0.7795	0.0095	0.0112	0.212026	0.012949	0.877717	0.010697	0.0126112	77.3894	4.72638	320.367	3.9044	4.60309
RIAU	KAB. KAMPAR	KAMPAR KIRI HULU	SIPSN	2020	Bad	2	0.908	331.435	0.1883	0.0115	0.7795	0.0095	0.0112	0.170976	0.010442	0.707786	0.008626	0.0101696	62.4064	3.81133	258.342	3.14849	3.7119
RIAU	KAB. KAMPAR	TAPUNG	SIPSN	2020	Bad	2	8.321	3037.32	0.1883	0.0115	0.7795	0.0095	0.0112	1.56684	0.0956915	6.48622	0.0790495	0.0931952	571.898	34.9274	2367.47	28.8531	34.0162
RIAU	KAB. KAMPAR	TAPUNG HILIR	SIPSN	2020	Bad	2	4.748	1733.02	0.1883	0.0115	0.7795	0.0095	0.0112	0.894048	0.054602	3.70107	0.045106	0.0531776	326.328	19.9297	1350.89	16.4637	19.4098
RIAU	KAB. KAMPAR	TAPUNG HULU	SIPSN	2020	Bad	2	6.504	2373.96	0.1883	0.0115	0.7795	0.0095	0.0112	1.2247	0.074796	5.06987	0.061788	0.0728448	447.017	27.3005	1850.5	22.5526	26.5884
RIAU	KAB. KAMPAR	SALO	SIPSN	2020	Bad	2	2.164	789.998	0.1883	0.0115	0.7795	0.0095	0.0112	0.407481	0.024886	1.68684	0.020558	0.0242368	148.731	9.08339	615.696	7.50367	8.84643
RIAU	KAB. KAMPAR	RUMBIO JAYA	SIPSN	2020	Bad	2	1.527	557.436	0.1883	0.0115	0.7795	0.0095	0.0112	0.287534	0.0175605	1.1903	0.0145065	0.0171024	104.95	6.40958	434.458	5.29487	6.24238
RIAU	KAB. KAMPAR	BANGKINANG	SIPSN	2020	Bad	2	2.852	1041.16	0.1883	0.0115	0.7795	0.0095	0.0112	0.537032	0.032798	2.22313	0.027094	0.0319424	196.017	11.9713	811.444	9.88931	11.659
RIAU	KAB. KAMPAR	PERHENTIAN RAJA	SIPSN	2020	Bad	2	1.619	590.967	0.1883	0.0115	0.7795	0.0095	0.0112	0.304858	0.0186185	1.26201	0.0153805	0.0181328	111.273	6.79575	460.634	5.61388	6.61847
RIAU	KAB. KAMPAR	KAMPA	SIPSN	2020	Bad	2	1.994	727.892	0.1883	0.0115	0.7795	0.0095	0.0112	0.37547	0.022931	1.55432	0.018943	0.0223328	137.047	8.36981	567.328	6.91419	8.15147
RIAU	KAB. KAMPAR	KAMPAR UTARA	SIPSN	2020	Bad	2	1.562	570.091	0.1883	0.0115	0.7795	0.0095	0.0112	0.294125	0.017963	1.21758	0.014839	0.0174944	107.355	6.55649	444.416	5.41624	6.38546
RIAU	KAB. KAMPAR	KAMPAR KIRI TENGAH	SIPSN	2020	Bad	2	2.305	841.403	0.1883	0.0115	0.7795	0.0095	0.0112	0.434031	0.0265075	1.79675	0.0218975	0.025816	158.421	9.67524	655.813	7.99259	9.42284
RIAU	KAB. KAMPAR	GUNUNG SAHILAN	SIPSN	2020	Bad	2	1.723	628.785	0.1883	0.0115	0.7795	0.0095	0.0112	0.324441	0.0198145	1.34308	0.0163685	0.0192976	118.421	7.23229	490.224	5.9745	7.04362
RIAU	KAB. KAMPAR	KOTO KAMPAR HULU	SIPSN	2020	Bad	2	1.658	605.109	0.1883	0.0115	0.7795	0.0095	0.0112	0.312201	0.019067	1.29241	0.015751	0.0185696	113.954	6.95945	471.73	5.74911	6.7779
RIAU	KAB. INDRAGIRI HULU	RENGAT	SIPSN	2022	Good	4	4.03	1471.08	0.122048	0.0112	0.761552	0.0467	0.0585	0.491854	0.045136	3.06905	0.188201	0.235755	179.527	16.4746	1120.2	68.6934	86.0506
RIAU	KAB. INDRAGIRI HULU	RENGAT BARAT	SIPSN	2022	Good	4	3.929	1433.93	0.122048	0.0112	0.761552	0.0467	0.0585	0.479528	0.0440048	2.99214	0.183484	0.229846	175.028	16.0618	1092.13	66.9718	83.894
RIAU	KAB. INDRAGIRI HULU	KELAYANG	SIPSN	2022	Good	4	1.999	729.688	0.122048	0.0112	0.761552	0.0467	0.0585	0.243974	0.0223888	1.52234	0.0933533	0.116942	89.0507	8.17191	555.655	34.074	42.6836
RIAU	KAB. INDRAGIRI HULU	PASIR PENYU	SIPSN	2022	Good	4	2.87	1047.57	0.122048	0.0112	0.761552	0.0467	0.0585	0.350279	0.032144	2.18565	0.134029	0.167895	127.852	11.7326	797.764	48.9206	61.2817
RIAU	KAB. INDRAGIRI HULU	PERANAP	SIPSN	2022	Good	4	2.876	1049.7	0.122048	0.0112	0.761552	0.0467	0.0585	0.351011	0.0322112	2.19022	0.134309	0.168246	128.119	11.7571	799.431	49.0229	61.4098
RIAU	KAB. INDRAGIRI HULU	SIBERIDA	SIPSN	2022	Good	4	4.564	1665.77	0.122048	0.0112	0.761552	0.0467	0.0585	0.557028	0.0511168	3.47572	0.213139	0.266994	203.315	18.6576	1268.64	77.7957	97.4528
RIAU	KAB. INDRAGIRI HULU	BATANG CENAKU	SIPSN	2022	Good	4	3.579	1306.39	0.122048	0.0112	0.761552	0.0467	0.0585	0.436811	0.0400848	2.72559	0.167139	0.209371	159.436	14.631	994.842	61.0058	76.4206
RIAU	KAB. INDRAGIRI HULU	BATANG GANGSAL	SIPSN	2022	Good	4	2.666	973.051	0.122048	0.0112	0.761552	0.0467	0.0585	0.325381	0.0298592	2.0303	0.124502	0.155961	118.764	10.8986	741.058	45.4433	56.9258
RIAU	KAB. INDRAGIRI HULU	LIRIK	SIPSN	2022	Good	4	2.169	791.767	0.122048	0.0112	0.761552	0.0467	0.0585	0.264723	0.0242928	1.65181	0.101292	0.126886	96.6238	8.86687	602.909	36.9717	46.3136
RIAU	KAB. INDRAGIRI HULU	KUALA CENAKU	SIPSN	2022	Good	4	1.174	428.545	0.122048	0.0112	0.761552	0.0467	0.0585	0.143285	0.0131488	0.894062	0.0548258	0.068679	52.2989	4.79931	326.333	20.0114	25.0678
RIAU	KAB. INDRAGIRI HULU	SUNGAI LALA	SIPSN	2022	Good	4	1.364	497.825	0.122048	0.0112	0.761552	0.0467	0.0585	0.166474	0.0152768	1.03876	0.0636988	0.079794	60.7629	5.57603	379.146	23.2501	29.1248
RIAU	KAB. INDRAGIRI HULU	LUBUK BATU JAYA	SIPSN	2022	Good	4	1.815	662.458	0.122048	0.0112	0.761552	0.0467	0.0585	0.221518	0.020328	1.38222	0.0847605	0.106177	80.8539	7.41972	504.509	30.9376	38.7548
RIAU	KAB. INDRAGIRI HULU	RAKIT KULIM	SIPSN	2022	Good	4	1.922	701.424	0.122048	0.0112	0.761552	0.0467	0.0585	0.234577	0.0215264	1.4637	0.0897574	0.112437	85.6205	7.85714	534.251	32.7615	41.0395
RIAU	KAB. INDRAGIRI HULU	BATANG PERANAP	SIPSN	2022	Good	4	1.095	399.541	0.122048	0.0112	0.761552	0.0467	0.0585	0.133643	0.012264	0.833899	0.0511365	0.0640575	48.7796	4.47636	304.373	18.6648	23.381
RIAU	KAB. BENGKALIS	BENGKALIS	SIPSN	2022	Good	4	7.966	2907.58	0.2399	0.0084	0.7212	0.0062	0.0243	1.91104	0.0669144	5.74508	0.0493892	0.193574	697.531	24.4238	2096.95	18.0271	70.6544
RIAU	KAB. BENGKALIS	BANTAN	SIPSN	2022	Good	4	3.978	1451.87	0.2399	0.0084	0.7212	0.0062	0.0243	0.954322	0.0334152	2.86893	0.0246636	0.0966654	348.328	12.1965	1047.16	9.00221	35.2829
RIAU	KAB. BENGKALIS	BUKIT BATU	SIPSN	2022	Good	4	1.979	722.328	0.2399	0.0084	0.7212	0.0062	0.0243	0.474762	0.0166236	1.42725	0.0122698	0.0480897	173.288	6.06761	520.948	4.47848	17.5527
RIAU	KAB. BENGKALIS	MANDAU	SIPSN	2022	Good	4	14.474	5282.97	0.2399	0.0084	0.7212	0.0062	0.0243	3.47231	0.121582	10.4386	0.0897388	0.351718	1267.39	44.3773	3810.11	32.7547	128.377
RIAU	KAB. BENGKALIS	RUPAT	SIPSN	2022	Good	4	3.488	1273.2	0.2399	0.0084	0.7212	0.0062	0.0243	0.836771	0.0292992	2.51555	0.0216256	0.0847584	305.421	10.6942	918.174	7.89334	30.9368
RIAU	KAB. BENGKALIS	RUPAT UTARA	SIPSN	2022	Good	4	1.458	531.998	0.2399	0.0084	0.7212	0.0062	0.0243	0.349774	0.0122472	1.05151	0.0090396	0.0354294	127.668	4.47023	383.801	3.29945	12.9317
RIAU	KAB. BENGKALIS	SIAK KECIL	SIPSN	2022	Good	4	2.406	878.041	0.2399	0.0084	0.7212	0.0062	0.0243	0.577199	0.0202104	1.73521	0.0149172	0.0584658	210.678	7.3768	633.351	5.44478	21.34
RIAU	KAB. BENGKALIS	PINGGIR	SIPSN	2022	Good	4	6.652	2428.08	0.2399	0.0084	0.7212	0.0062	0.0243	1.59581	0.0558768	4.79742	0.0412424	0.161644	582.472	20.395	1751.06	15.0535	58.9999
RIAU	KAB. BENGKALIS	BANDAR LAKSAMANA	SIPSN	2022	Good	4	1.615	589.544	0.2399	0.0084	0.7212	0.0062	0.0243	0.387439	0.013566	1.16474	0.010013	0.0392445	141.415	4.95159	425.129	3.65474	14.3242
RIAU	KAB. BENGKALIS	TALANG MUANDAU	SIPSN	2022	Good	4	2.81	1025.55	0.2399	0.0084	0.7212	0.0062	0.0243	0.674119	0.023604	2.02657	0.017422	0.068283	246.053	8.61546	739.699	6.35903	24.9233
RIAU	KAB. BENGKALIS	BATHIN SOLAPAN	SIPSN	2022	Good	4	9.757	3561.44	0.2399	0.0084	0.7212	0.0062	0.0243	2.3407	0.0819588	7.03675	0.0604934	0.237095	854.357	29.915	2568.41	22.0801	86.5397
RIAU	KAB. INDRAGIRI HILIR	RETEH	Average of Province	Filling Data	Worst	1	3.771	1376.49	0.212084	0.0072	0.507016	0.1755	0.0982	0.799768	0.0271512	1.91196	0.661811	0.370312	291.915	9.91019	697.865	241.561	135.164
RIAU	KAB. INDRAGIRI HILIR	ENOK	Average of Province	Filling Data	Worst	1	3.673	1340.63	0.212084	0.0072	0.507016	0.1755	0.0982	0.778984	0.0264456	1.86227	0.644612	0.360689	284.329	9.65264	679.729	235.283	131.651
RIAU	KAB. INDRAGIRI HILIR	KUALA INDRAGIRI	Average of Province	Filling Data	Worst	1	1.627	593.94	0.212084	0.0072	0.507016	0.1755	0.0982	0.34506	0.0117144	0.824915	0.285539	0.159771	125.947	4.27576	301.094	104.222	58.3166
RIAU	KAB. INDRAGIRI HILIR	TEMBILAHAN	Average of Province	Filling Data	Worst	1	8.324	3038.2	0.212084	0.0072	0.507016	0.1755	0.0982	1.76539	0.0599328	4.2204	1.46086	0.817417	644.366	21.8755	1540.45	533.215	298.357
RIAU	KAB. INDRAGIRI HILIR	TEMPULING	Average of Province	Filling Data	Worst	1	3.542	1292.78	0.212084	0.0072	0.507016	0.1755	0.0982	0.751201	0.0255024	1.79585	0.621621	0.347824	274.188	9.30838	655.486	226.892	126.956
RIAU	KAB. INDRAGIRI HILIR	GAUNG ANAK SERKA	Average of Province	Filling Data	Worst	1	2.426	885.351	0.212084	0.0072	0.507016	0.1755	0.0982	0.514516	0.0174672	1.23002	0.425763	0.238233	187.798	6.37553	448.958	155.403	86.9551
RIAU	KAB. INDRAGIRI HILIR	MANDAH	Average of Province	Filling Data	Worst	1	3.906	1425.62	0.212084	0.0072	0.507016	0.1755	0.0982	0.8284	0.0281232	1.9804	0.685503	0.383569	302.366	10.265	722.848	250.209	140.003
RIAU	KAB. INDRAGIRI HILIR	KATEMAN	Average of Province	Filling Data	Worst	1	4.366	1593.58	0.212084	0.0072	0.507016	0.1755	0.0982	0.925958	0.0314352	2.21363	0.766233	0.428741	337.975	11.4738	807.976	279.675	156.491
RIAU	KAB. INDRAGIRI HILIR	KERITANG	Average of Province	Filling Data	Worst	1	6.82	2489.45	0.212084	0.0072	0.507016	0.1755	0.0982	1.44641	0.049104	3.45785	1.19691	0.669724	527.94	17.923	1262.12	436.872	244.449
RIAU	KAB. INDRAGIRI HILIR	TANAH MERAH	Average of Province	Filling Data	Worst	1	2.712	989.724	0.212084	0.0072	0.507016	0.1755	0.0982	0.575171	0.0195264	1.37503	0.475956	0.266318	209.938	7.12714	501.885	173.724	97.2062
RIAU	KAB. INDRAGIRI HILIR	BATANG TUAKA	Average of Province	Filling Data	Worst	1	2.976	1086.4	0.212084	0.0072	0.507016	0.1755	0.0982	0.631162	0.0214272	1.50888	0.522288	0.292243	230.374	7.82093	550.741	190.635	106.669
RIAU	KAB. INDRAGIRI HILIR	GAUNG	Average of Province	Filling Data	Worst	1	4.227	1542.73	0.212084	0.0072	0.507016	0.1755	0.0982	0.896479	0.0304344	2.14316	0.741839	0.415091	327.215	11.1086	782.252	270.771	151.508
RIAU	KAB. INDRAGIRI HILIR	TEMBILAHAN HULU	Average of Province	Filling Data	Worst	1	5.076	1852.77	0.212084	0.0072	0.507016	0.1755	0.0982	1.07654	0.0365472	2.57361	0.890838	0.498463	392.936	13.3397	939.369	325.156	181.939
RIAU	KAB. INDRAGIRI HILIR	KEMUNING	Average of Province	Filling Data	Worst	1	4.312	1573.75	0.212084	0.0072	0.507016	0.1755	0.0982	0.914506	0.0310464	2.18625	0.756756	0.423438	333.795	11.3319	797.983	276.216	154.555
RIAU	KAB. INDRAGIRI HILIR	PELANGIRAN	Average of Province	Filling Data	Worst	1	3.229	1178.6	0.212084	0.0072	0.507016	0.1755	0.0982	0.684819	0.0232488	1.63716	0.56669	0.317088	249.959	8.48581	597.562	206.842	115.737
RIAU	KAB. INDRAGIRI HILIR	TELUK BELENGKONG	Average of Province	Filling Data	Worst	1	0.94	343.053	0.212084	0.0072	0.507016	0.1755	0.0982	0.199359	0.006768	0.476595	0.16497	0.092308	72.766	2.47032	173.957	60.2141	33.6924
RIAU	KAB. INDRAGIRI HILIR	PULAU BURUNG	Average of Province	Filling Data	Worst	1	2.028	740.34	0.212084	0.0072	0.507016	0.1755	0.0982	0.430106	0.0146016	1.02823	0.355914	0.19915	156.989	5.32958	375.303	129.909	72.6896
RIAU	KAB. INDRAGIRI HILIR	CONCONG	Average of Province	Filling Data	Worst	1	1.223	446.3	0.212084	0.0072	0.507016	0.1755	0.0982	0.259379	0.0088056	0.620081	0.214637	0.120099	94.6732	3.21404	226.329	78.3423	43.836
RIAU	KAB. INDRAGIRI HILIR	KEMPAS	Average of Province	Filling Data	Worst	1	4.132	1508.06	0.212084	0.0072	0.507016	0.1755	0.0982	0.876331	0.0297504	2.09499	0.725166	0.405762	319.861	10.8589	764.672	264.686	148.103
RIAU	KAB. INDRAGIRI HILIR	SUNGAI BATANG	Average of Province	Filling Data	Worst	1	1.07	390.376	0.212084	0.0072	0.507016	0.1755	0.0982	0.22693	0.007704	0.542507	0.187785	0.105074	82.8294	2.81196	198.015	68.5415	38.352
RIAU	KAB. PELALAWAN	UKUI	Average of Province	Filling Data	Worst	1	3.059	1116.38	0.2937	0.0036	0.6765	0.0167	0.0095	0.898428	0.0110124	2.06941	0.0510853	0.0290605	327.926	4.01953	755.336	18.6461	10.6071
RIAU	KAB. PELALAWAN	PANGKALAN KERINCI	Average of Province	Filling Data	Worst	1	7.622	2782.01	0.2937	0.0036	0.6765	0.0167	0.0095	2.23858	0.0274392	5.15628	0.127287	0.072409	817.082	10.0153	1882.04	46.4599	26.4293
RIAU	KAB. PELALAWAN	PANGKALAN KURAS	Average of Province	Filling Data	Worst	1	4.943	1804.33	0.2937	0.0036	0.6765	0.0167	0.0095	1.45176	0.0177948	3.34394	0.0825481	0.0469585	529.892	6.4951	1220.54	30.1301	17.1399
RIAU	KAB. PELALAWAN	PANGKALAN LESUNG	Average of Province	Filling Data	Worst	1	2.218	809.515	0.2937	0.0036	0.6765	0.0167	0.0095	0.651427	0.0079848	1.50048	0.0370406	0.021071	237.771	2.91445	547.674	13.5198	7.69091
RIAU	KAB. PELALAWAN	LANGGAM	Average of Province	Filling Data	Worst	1	2.621	956.505	0.2937	0.0036	0.6765	0.0167	0.0095	0.769788	0.0094356	1.77311	0.0437707	0.0248995	280.973	3.44399	647.184	15.9763	9.08832
RIAU	KAB. PELALAWAN	PELALAWAN	Average of Province	Filling Data	Worst	1	1.506	549.866	0.2937	0.0036	0.6765	0.0167	0.0095	0.442312	0.0054216	1.01881	0.0251502	0.014307	161.444	1.97888	371.865	9.17982	5.22206
RIAU	KAB. PELALAWAN	KERUMUTAN	Average of Province	Filling Data	Worst	1	1.874	683.995	0.2937	0.0036	0.6765	0.0167	0.0095	0.550394	0.0067464	1.26776	0.0312958	0.017803	200.894	2.46244	462.733	11.423	6.4981
RIAU	KAB. PELALAWAN	BUNUT	Average of Province	Filling Data	Worst	1	1.174	428.516	0.2937	0.0036	0.6765	0.0167	0.0095	0.344804	0.0042264	0.794211	0.0196058	0.011153	125.853	1.54264	289.887	7.15612	4.07085
RIAU	KAB. PELALAWAN	TELUK MERANTI	Average of Province	Filling Data	Worst	1	1.337	487.864	0.2937	0.0036	0.6765	0.0167	0.0095	0.392677	0.0048132	0.90448	0.0223279	0.0127015	143.327	1.75682	330.135	8.14968	4.63605
RIAU	KAB. PELALAWAN	KUALA KAMPAR	Average of Province	Filling Data	Worst	1	1.328	484.588	0.2937	0.0036	0.6765	0.0167	0.0095	0.390034	0.0047808	0.898392	0.0221776	0.012616	142.362	1.74499	327.913	8.09482	4.60484
RIAU	KAB. PELALAWAN	BANDAR SEI KIJANG	Average of Province	Filling Data	Worst	1	1.61	587.798	0.2937	0.0036	0.6765	0.0167	0.0095	0.472857	0.005796	1.08916	0.026887	0.015295	172.593	2.11554	397.545	9.81376	5.58268
RIAU	KAB. PELALAWAN	BANDAR PETALANGAN	Average of Province	Filling Data	Worst	1	1.264	461.52	0.2937	0.0036	0.6765	0.0167	0.0095	0.371237	0.0045504	0.855096	0.0211088	0.012008	135.501	1.6609	312.11	7.70471	4.38292
RIAU	KAB. ROKAN HULU	UJUNG BATU	Average of Province	Filling Data	Worst	1	7.492	2734.42	0.0712	0.0193	0.8042	0.0462	0.0591	0.53343	0.144596	6.02507	0.34613	0.442777	194.702	52.7774	2199.15	126.338	161.614
RIAU	KAB. ROKAN HULU	ROKAN IV KOTO	Average of Province	Filling Data	Worst	1	3.615	1319.46	0.0712	0.0193	0.8042	0.0462	0.0591	0.257388	0.0697695	2.90718	0.167013	0.213647	93.9466	25.4659	1061.12	60.9597	77.981
RIAU	KAB. ROKAN HULU	RAMBAH	Average of Province	Filling Data	Worst	1	7.945	2899.79	0.0712	0.0193	0.8042	0.0462	0.0591	0.565684	0.153338	6.38937	0.367059	0.46955	206.475	55.9686	2332.12	133.977	171.386
RIAU	KAB. ROKAN HULU	TAMBUSAI	Average of Province	Filling Data	Worst	1	9.284	3388.62	0.0712	0.0193	0.8042	0.0462	0.0591	0.661021	0.179181	7.46619	0.428921	0.548684	241.273	65.4011	2725.16	156.556	200.27
RIAU	KAB. ROKAN HULU	KEPENUHAN	Average of Province	Filling Data	Worst	1	4.104	1498.07	0.0712	0.0193	0.8042	0.0462	0.0591	0.292205	0.0792072	3.30044	0.189605	0.242546	106.655	28.9106	1204.66	69.2058	88.5294
RIAU	KAB. ROKAN HULU	KUNTO DARUSSALAM	Average of Province	Filling Data	Worst	1	6.856	2502.39	0.0712	0.0193	0.8042	0.0462	0.0591	0.488147	0.132321	5.5136	0.316747	0.40519	178.174	48.2971	2012.46	115.613	147.894
RIAU	KAB. ROKAN HULU	RAMBAH SAMO	Average of Province	Filling Data	Worst	1	5.126	1870.82	0.0712	0.0193	0.8042	0.0462	0.0591	0.364971	0.0989318	4.12233	0.236821	0.302947	133.214	36.1101	1504.65	86.4397	110.576
RIAU	KAB. ROKAN HULU	RAMBAH HILIR	Average of Province	Filling Data	Worst	1	6.218	2269.51	0.0712	0.0193	0.8042	0.0462	0.0591	0.442722	0.120007	5.00052	0.287272	0.367484	161.593	43.8027	1825.19	104.854	134.132
RIAU	KAB. ROKAN HULU	TAMBUSAI UTARA	Average of Province	Filling Data	Worst	1	13.102	4782.12	0.0712	0.0193	0.8042	0.0462	0.0591	0.932862	0.252869	10.5366	0.605312	0.774328	340.495	92.297	3845.87	220.939	282.63
RIAU	KAB. ROKAN HULU	BANGUN PURBA	Average of Province	Filling Data	Worst	1	2.968	1083.23	0.0712	0.0193	0.8042	0.0462	0.0591	0.211322	0.0572824	2.38687	0.137122	0.175409	77.1324	20.9081	871.206	50.0494	64.0242
RIAU	KAB. ROKAN HULU	TANDUN	Average of Province	Filling Data	Worst	1	4.88	1781.35	0.0712	0.0193	0.8042	0.0462	0.0591	0.347456	0.094184	3.9245	0.225456	0.288408	126.821	34.3772	1432.44	82.2914	105.269
RIAU	KAB. ROKAN HULU	KABUN	Average of Province	Filling Data	Worst	1	4.156	1516.96	0.0712	0.0193	0.8042	0.0462	0.0591	0.295907	0.0802108	3.34226	0.192007	0.24562	108.006	29.2769	1219.92	70.0826	89.6512
RIAU	KAB. ROKAN HULU	BONAI DARUSSALAM	Average of Province	Filling Data	Worst	1	4.114	1501.64	0.0712	0.0193	0.8042	0.0462	0.0591	0.292917	0.0794002	3.30848	0.190067	0.243137	106.915	28.9811	1207.59	69.3744	88.7452
RIAU	KAB. ROKAN HULU	PAGARAN TAPAH DARUSSALAM	Average of Province	Filling Data	Worst	1	1.879	685.939	0.0712	0.0193	0.8042	0.0462	0.0591	0.133785	0.0362647	1.51109	0.0868098	0.111049	48.8315	13.2366	551.549	31.6856	40.5328
RIAU	KAB. ROKAN HULU	KEPENUHAN HULU	Average of Province	Filling Data	Worst	1	2.788	1017.73	0.0712	0.0193	0.8042	0.0462	0.0591	0.198506	0.0538084	2.24211	0.128806	0.164771	72.4545	19.6401	818.37	47.014	60.1413
RIAU	KAB. ROKAN HULU	PENDALIAN IV KOTO	Average of Province	Filling Data	Worst	1	1.893	690.801	0.0712	0.0193	0.8042	0.0462	0.0591	0.134782	0.0365349	1.52235	0.0874566	0.111876	49.1953	13.3352	555.658	31.9217	40.8348
RIAU	KAB. ROKAN HILIR	KUBU	Average of Province	Filling Data	Worst	1	4.051	1478.7	0.1486	0.0116	0.7338	0.0479	0.0581	0.601979	0.0469916	2.97262	0.194043	0.235363	219.722	17.1519	1085.01	70.8257	85.9075
RIAU	KAB. ROKAN HILIR	BANGKO	Average of Province	Filling Data	Worst	1	12.08	4409.15	0.1486	0.0116	0.7338	0.0479	0.0581	1.79509	0.140128	8.8643	0.578632	0.701848	655.207	51.1467	3235.47	211.201	256.175
RIAU	KAB. ROKAN HILIR	TANAH PUTIH	Average of Province	Filling Data	Worst	1	10.916	3984.51	0.1486	0.0116	0.7338	0.0479	0.0581	1.62212	0.126626	8.01016	0.522876	0.63422	592.073	46.2183	2923.71	190.85	231.49
RIAU	KAB. ROKAN HILIR	RIMBA MELINTANG	Average of Province	Filling Data	Worst	1	5.869	2142.17	0.1486	0.0116	0.7338	0.0479	0.0581	0.872133	0.0680804	4.30667	0.281125	0.340989	318.329	24.8493	1571.94	102.611	124.461
RIAU	KAB. ROKAN HILIR	BAGANSINEMBAH	Average of Province	Filling Data	Worst	1	10.006	3652.09	0.1486	0.0116	0.7338	0.0479	0.0581	1.48689	0.11607	7.3424	0.479287	0.581349	542.715	42.3654	2679.98	174.94	212.192
RIAU	KAB. ROKAN HILIR	PASIR LIMAU KAPAS	Average of Province	Filling Data	Worst	1	5.634	2056.32	0.1486	0.0116	0.7338	0.0479	0.0581	0.837212	0.0653544	4.13423	0.269869	0.327335	305.583	23.8544	1508.99	98.502	119.477
RIAU	KAB. ROKAN HILIR	SINABOI	Average of Province	Filling Data	Worst	1	3.047	1112.02	0.1486	0.0116	0.7338	0.0479	0.0581	0.452784	0.0353452	2.23589	0.145951	0.177031	165.266	12.901	816.099	53.2722	64.6162
RIAU	KAB. ROKAN HILIR	PUJUD	Average of Province	Filling Data	Worst	1	5.083	1855.16	0.1486	0.0116	0.7338	0.0479	0.0581	0.755334	0.0589628	3.72991	0.243476	0.295322	275.697	21.5214	1361.42	88.8686	107.793
RIAU	KAB. ROKAN HILIR	TANAH PUTIH TANJUNG MELAWAN	Average of Province	Filling Data	Worst	1	2.347	856.551	0.1486	0.0116	0.7338	0.0479	0.0581	0.348764	0.0272252	1.72223	0.112421	0.136361	127.299	9.9372	628.613	41.0338	49.7717
RIAU	KAB. ROKAN HILIR	BANGKO PUSAKO	Average of Province	Filling Data	Worst	1	9.56	3489.57	0.1486	0.0116	0.7338	0.0479	0.0581	1.42062	0.110896	7.01513	0.457924	0.555436	518.525	40.477	2560.52	167.142	202.734
RIAU	KAB. ROKAN HILIR	SIMPANG KANAN	Average of Province	Filling Data	Worst	1	3.708	1353.56	0.1486	0.0116	0.7338	0.0479	0.0581	0.551009	0.0430128	2.72093	0.177613	0.215435	201.118	15.6997	993.14	64.8288	78.6337
RIAU	KAB. ROKAN HILIR	BATU HAMPAR	Average of Province	Filling Data	Worst	1	1.47	536.416	0.1486	0.0116	0.7338	0.0479	0.0581	0.218442	0.017052	1.07869	0.070413	0.085407	79.7313	6.22398	393.72	25.7007	31.1736
RIAU	KAB. ROKAN HILIR	RANTAU KOPAR	Average of Province	Filling Data	Worst	1	1.006	367.234	0.1486	0.0116	0.7338	0.0479	0.0581	0.149492	0.0116696	0.738203	0.0481874	0.0584486	54.5644	4.2594	269.444	17.5884	21.3337
RIAU	KAB. ROKAN HILIR	PEKAITAN	Average of Province	Filling Data	Worst	1	2.492	909.434	0.1486	0.0116	0.7338	0.0479	0.0581	0.370311	0.0289072	1.82863	0.119367	0.144785	135.164	10.5511	667.45	43.5689	52.8466
RIAU	KAB. ROKAN HILIR	KUBU BABUSSALAM	Average of Province	Filling Data	Worst	1	3.714	1355.64	0.1486	0.0116	0.7338	0.0479	0.0581	0.5519	0.0430824	2.72533	0.177901	0.215783	201.444	15.7251	994.747	64.9337	78.7609
RIAU	KAB. ROKAN HILIR	TANJUNG MEDAN	Average of Province	Filling Data	Worst	1	5.558	2028.55	0.1486	0.0116	0.7338	0.0479	0.0581	0.825919	0.0644728	4.07846	0.266228	0.32292	301.46	23.5326	1488.64	97.1733	117.866
RIAU	KAB. ROKAN HILIR	BAGAN SINEMBAH RAYA	Average of Province	Filling Data	Worst	1	3.167	1156.11	0.1486	0.0116	0.7338	0.0479	0.0581	0.470616	0.0367372	2.32394	0.151699	0.184003	171.775	13.4091	848.24	55.3702	67.161
RIAU	KAB. ROKAN HILIR	BALAI JAYA	Average of Province	Filling Data	Worst	1	8.121	2964.34	0.1486	0.0116	0.7338	0.0479	0.0581	1.20678	0.0942036	5.95919	0.388996	0.47183	440.475	34.3843	2175.1	141.984	172.218
RIAU	KAB. SIAK	SIAK	SIPSN	2022	Good	4	2.585	943.519	0.3458	0.0041	0.6083	0.0141	0.0277	0.893893	0.0105985	1.57246	0.0364485	0.0716045	326.271	3.86845	573.946	13.3037	26.1356
RIAU	KAB. SIAK	SUNGAI APIT	SIPSN	2022	Good	4	2.55	930.752	0.3458	0.0041	0.6083	0.0141	0.0277	0.88179	0.010455	1.55116	0.035955	0.070635	321.853	3.81607	566.175	13.1236	25.7818
RIAU	KAB. SIAK	MINAS	SIPSN	2022	Good	4	2.474	902.874	0.3458	0.0041	0.6083	0.0141	0.0277	0.855509	0.0101434	1.50493	0.0348834	0.0685298	312.261	3.70234	549.301	12.7324	25.0134
RIAU	KAB. SIAK	TUALANG	SIPSN	2022	Good	4	9.505	3469.44	0.3458	0.0041	0.6083	0.0141	0.0277	3.28683	0.0389705	5.78189	0.134021	0.263289	1199.69	14.2242	2110.39	48.9175	96.1003
RIAU	KAB. SIAK	SUNGAI MANDAU	SIPSN	2022	Good	4	0.803	293.228	0.3458	0.0041	0.6083	0.0141	0.0277	0.277677	0.0032923	0.488465	0.0113223	0.0222431	101.352	1.20169	178.29	4.13264	8.11873
RIAU	KAB. SIAK	DAYUN	SIPSN	2022	Good	4	2.554	932.344	0.3458	0.0041	0.6083	0.0141	0.0277	0.883173	0.0104714	1.5536	0.0360114	0.0707458	322.358	3.82206	567.063	13.1442	25.8222
RIAU	KAB. SIAK	KERINCI KANAN	SIPSN	2022	Good	4	1.867	681.324	0.3458	0.0041	0.6083	0.0141	0.0277	0.645609	0.0076547	1.1357	0.0263247	0.0517159	235.647	2.79397	414.529	9.60852	18.8763
RIAU	KAB. SIAK	BUNGA RAYA	SIPSN	2022	Good	4	2.241	818.052	0.3458	0.0041	0.6083	0.0141	0.0277	0.774938	0.0091881	1.3632	0.0315981	0.0620757	282.852	3.35366	497.568	11.5333	22.6576
RIAU	KAB. SIAK	KOTO GASIB	SIPSN	2022	Good	4	1.919	700.402	0.3458	0.0041	0.6083	0.0141	0.0277	0.66359	0.0078679	1.16733	0.0270579	0.0531563	242.21	2.87178	426.075	9.87613	19.402
RIAU	KAB. SIAK	KANDIS	SIPSN	2022	Good	4	6.057	2210.72	0.3458	0.0041	0.6083	0.0141	0.0277	2.09451	0.0248337	3.68447	0.0854037	0.167779	764.496	9.0643	1344.83	31.1724	61.2393
RIAU	KAB. SIAK	LUBUK DALAM	SIPSN	2022	Good	4	1.63	594.794	0.3458	0.0041	0.6083	0.0141	0.0277	0.563654	0.006683	0.991529	0.022983	0.045151	205.734	2.43929	361.908	8.38879	16.4801
RIAU	KAB. SIAK	SABAK AUH	SIPSN	2022	Good	4	1.081	394.464	0.3458	0.0041	0.6083	0.0141	0.0277	0.37381	0.0044321	0.657572	0.0152421	0.0299437	136.441	1.61772	240.014	5.56337	10.9295
RIAU	KAB. SIAK	MEMPURA	SIPSN	2022	Good	4	1.406	513.244	0.3458	0.0041	0.6083	0.0141	0.0277	0.486195	0.0057646	0.85527	0.0198246	0.0389462	177.461	2.10408	312.173	7.23598	14.2154
RIAU	KAB. SIAK	PUSAKO	SIPSN	2022	Good	4	0.644	235.098	0.3458	0.0041	0.6083	0.0141	0.0277	0.222695	0.0026404	0.391745	0.0090804	0.0178388	81.2837	0.963746	142.987	3.31435	6.51116
RIAU	KAB. KUANTAN SINGINGI	KUANTAN MUDIK	SIPSN	2022	Good	4	1.929	704.255	0.0505	0.0133	0.8488	0.0358	0.0516	0.0974145	0.0256557	1.63734	0.0690582	0.0995364	35.5563	9.36433	597.627	25.2062	36.3308
RIAU	KAB. KUANTAN SINGINGI	KUANTAN TENGAH	SIPSN	2022	Good	4	4.048	1477.46	0.0505	0.0133	0.8488	0.0358	0.0516	0.204424	0.0538384	3.43594	0.144918	0.208877	74.6148	19.651	1254.12	52.8952	76.24
RIAU	KAB. KUANTAN SINGINGI	SINGINGI	SIPSN	2022	Good	4	2.701	986.029	0.0505	0.0133	0.8488	0.0358	0.0516	0.136401	0.0359233	2.29261	0.0966958	0.139372	49.7862	13.112	836.802	35.294	50.8706
RIAU	KAB. KUANTAN SINGINGI	KUANTAN HILIR	SIPSN	2022	Good	4	1.105	403.292	0.0505	0.0133	0.8488	0.0358	0.0516	0.0558025	0.0146965	0.937924	0.039559	0.057018	20.3679	5.36422	342.342	14.439	20.8116
RIAU	KAB. KUANTAN SINGINGI	CERENTI	SIPSN	2022	Good	4	1.247	455.193	0.0505	0.0133	0.8488	0.0358	0.0516	0.0629735	0.0165851	1.05845	0.0446426	0.0643452	22.9853	6.05356	386.336	16.2945	23.486
RIAU	KAB. KUANTAN SINGINGI	BENAI	SIPSN	2022	Good	4	1.341	489.571	0.0505	0.0133	0.8488	0.0358	0.0516	0.0677205	0.0178353	1.13824	0.0480078	0.0691956	24.718	6.50988	415.458	17.5228	25.2564
RIAU	KAB. KUANTAN SINGINGI	GUNUNGTOAR	SIPSN	2022	Good	4	1.076	392.906	0.0505	0.0133	0.8488	0.0358	0.0516	0.054338	0.0143108	0.913309	0.0385208	0.0555216	19.8334	5.22344	333.358	14.0601	20.2654
RIAU	KAB. KUANTAN SINGINGI	SINGINGI HILIR	SIPSN	2022	Good	4	3.361	1226.76	0.0505	0.0133	0.8488	0.0358	0.0516	0.169731	0.0447013	2.85282	0.120324	0.173428	61.9516	16.316	1041.28	43.9182	63.3011
RIAU	KAB. KUANTAN SINGINGI	PANGEAN	SIPSN	2022	Good	4	1.568	572.379	0.0505	0.0133	0.8488	0.0358	0.0516	0.079184	0.0208544	1.33092	0.0561344	0.0809088	28.9022	7.61186	485.785	20.4891	29.5317
RIAU	KAB. KUANTAN SINGINGI	LOGAS TANAH DARAT	SIPSN	2022	Good	4	1.952	712.391	0.0505	0.0133	0.8488	0.0358	0.0516	0.098576	0.0259616	1.65686	0.0698816	0.100723	35.9802	9.47598	604.753	25.5068	36.764
RIAU	KAB. KUANTAN SINGINGI	INUMAN	SIPSN	2022	Good	4	1.271	463.773	0.0505	0.0133	0.8488	0.0358	0.0516	0.0641855	0.0169043	1.07882	0.0455018	0.0655836	23.4277	6.17007	393.771	16.6082	23.938
RIAU	KAB. KUANTAN SINGINGI	HULU KUANTAN	SIPSN	2022	Good	4	0.735	268.139	0.0505	0.0133	0.8488	0.0358	0.0516	0.0371175	0.0097755	0.623868	0.026313	0.037926	13.5479	3.56806	227.712	9.60425	13.843
RIAU	KAB. KUANTAN SINGINGI	KUANTAN HILIR SEBERANG	SIPSN	2022	Good	4	0.856	312.515	0.0505	0.0133	0.8488	0.0358	0.0516	0.043228	0.0113848	0.726573	0.0306448	0.0441696	15.7782	4.15545	265.199	11.1854	16.1219
RIAU	KAB. KUANTAN SINGINGI	SENTAJO RAYA	SIPSN	2022	Good	4	2.421	883.505	0.0505	0.0133	0.8488	0.0358	0.0516	0.122261	0.0321993	2.05494	0.0866718	0.124924	44.6251	11.7527	750.055	31.6352	45.5971
RIAU	KAB. KUANTAN SINGINGI	PUCUK RANTAU	SIPSN	2022	Good	4	0.861	314.097	0.0505	0.0133	0.8488	0.0358	0.0516	0.0434805	0.0114513	0.730817	0.0308238	0.0444276	15.8704	4.17972	266.748	11.2507	16.2161
RIAU	KAB. KEPULAUAN MERANTI	TEBING TINGGI	Average of Province	Filling Data	Worst	1	6.853	2501.16	0.0172111	0	0.957989	0.0185	0.0063	0.117948	0	6.5651	0.126781	0.0431739	43.051	0	2396.26	46.2749	15.7585
RIAU	KAB. KEPULAUAN MERANTI	RANGSANG BARAT	Average of Province	Filling Data	Worst	1	2.079	758.969	0.0172111	0	0.957989	0.0185	0.0063	0.0357819	0	1.99166	0.0384615	0.0130977	13.0604	0	726.955	14.0384	4.78066
RIAU	KAB. KEPULAUAN MERANTI	RANGSANG	Average of Province	Filling Data	Worst	1	2.135	779.438	0.0172111	0	0.957989	0.0185	0.0063	0.0367458	0	2.04531	0.0394975	0.0134505	13.4122	0	746.537	14.4166	4.90943
RIAU	KAB. KEPULAUAN MERANTI	TEBING TINGGI BARAT	Average of Province	Filling Data	Worst	1	1.982	723.289	0.0172111	0	0.957989	0.0185	0.0063	0.0341125	0	1.89873	0.036667	0.0124866	12.451	0	693.038	13.3835	4.55761
RIAU	KAB. KEPULAUAN MERANTI	MERBAU	Average of Province	Filling Data	Worst	1	1.643	599.836	0.0172111	0	0.957989	0.0185	0.0063	0.0282779	0	1.57398	0.0303955	0.0103509	10.3214	0	574.501	11.0944	3.77808
RIAU	KAB. KEPULAUAN MERANTI	PULAUMERBAU	Average of Province	Filling Data	Worst	1	1.727	630.221	0.0172111	0	0.957989	0.0185	0.0063	0.0297236	0	1.65445	0.0319495	0.0108801	10.8491	0	603.873	11.6616	3.97124
RIAU	KAB. KEPULAUAN MERANTI	TEBING TINGGI TIMUR	Average of Province	Filling Data	Worst	1	1.435	523.782	0.0172111	0	0.957989	0.0185	0.0063	0.024698	0	1.37471	0.0265475	0.0090405	9.01476	0	501.771	9.68984	3.29978
RIAU	KAB. KEPULAUAN MERANTI	TASIK PUTRI PUYU	Average of Province	Filling Data	Worst	1	1.851	675.666	0.0172111	0	0.957989	0.0185	0.0063	0.0318578	0	1.77324	0.0342435	0.0116613	11.6281	0	647.232	12.4989	4.25637
RIAU	KAB. KEPULAUAN MERANTI	RANGSANG PESISIR	Average of Province	Filling Data	Worst	1	2.026	739.364	0.0172111	0	0.957989	0.0185	0.0063	0.0348697	0	1.94089	0.037481	0.0127638	12.7275	0	708.423	13.6806	4.65879
RIAU	KOTA PEKANBARU	SUKAJADI	SIPSN	2022	Good	4	9.256	3378.57	0.7457	0.0046	0.2263	0.0073	0.0161	6.9022	0.0425776	2.09463	0.0675688	0.149022	2519.3	15.5408	764.541	24.6626	54.3929
RIAU	KOTA PEKANBARU	PEKANBARU KOTA	SIPSN	2022	Good	4	5.148	1878.98	0.7457	0.0046	0.2263	0.0073	0.0161	3.83886	0.0236808	1.16499	0.0375804	0.0828828	1401.19	8.64349	425.222	13.7168	30.2522
RIAU	KOTA PEKANBARU	SAIL	SIPSN	2022	Good	4	4.895	1786.6	0.7457	0.0046	0.2263	0.0073	0.0161	3.6502	0.022517	1.10774	0.0357335	0.0788095	1332.32	8.2187	404.325	13.0427	28.7655
RIAU	KOTA PEKANBARU	LIMA PULUH	SIPSN	2022	Good	4	8.555	3122.55	0.7457	0.0046	0.2263	0.0073	0.0161	6.37946	0.039353	1.936	0.0624515	0.137735	2328.5	14.3638	706.639	22.7948	50.2735
RIAU	KOTA PEKANBARU	SENAPELAN	SIPSN	2022	Good	4	7.385	2695.54	0.7457	0.0046	0.2263	0.0073	0.0161	5.50699	0.033971	1.67123	0.0539105	0.118898	2010.05	12.3994	609.997	19.6773	43.398
RIAU	KOTA PEKANBARU	RUMBAI BARAT	SIPSN	2022	Good	4	5.197	1896.98	0.7457	0.0046	0.2263	0.0073	0.0161	3.8754	0.0239062	1.17608	0.0379381	0.0836717	1414.52	8.72576	429.27	13.8474	30.5402
RIAU	KOTA PEKANBARU	BUKIT RAYA	SIPSN	2022	Good	4	20.011	7304.01	0.7457	0.0046	0.2263	0.0073	0.0161	14.9222	0.0920506	4.52849	0.14608	0.322177	5446.6	33.5985	1652.9	53.3193	117.595
RIAU	KOTA PEKANBARU	BINAWIDYA	SIPSN	2022	Good	4	14.702	5366.2	0.7457	0.0046	0.2263	0.0073	0.0161	10.9633	0.0676292	3.32706	0.107325	0.236702	4001.6	24.6847	1214.38	39.1735	86.3963
RIAU	KOTA PEKANBARU	MARPOYAN DAMAI	SIPSN	2022	Good	4	28.052	10238.8	0.7457	0.0046	0.2263	0.0073	0.0161	20.9184	0.129039	6.34817	0.20478	0.451637	7635.21	47.0993	2317.08	74.7446	164.848
RIAU	KOTA PEKANBARU	TENAYAN RAYA	SIPSN	2022	Good	4	21.518	7853.98	0.7457	0.0046	0.2263	0.0073	0.0161	16.046	0.0989828	4.86952	0.157081	0.34644	5856.78	36.1287	1777.38	57.3347	126.451
RIAU	KOTA PEKANBARU	PAYUNG SEKAKI	SIPSN	2022	Good	4	18.894	6896.45	0.7457	0.0046	0.2263	0.0073	0.0161	14.0893	0.0869124	4.27571	0.137926	0.304193	5142.58	31.723	1560.63	50.3431	111.031
RIAU	KOTA PEKANBARU	RUMBAI	SIPSN	2022	Good	4	19.182	7001.33	0.7457	0.0046	0.2263	0.0073	0.0161	14.304	0.0882372	4.34089	0.140029	0.30883	5220.97	32.2066	1584.42	51.1104	112.723
RIAU	KOTA PEKANBARU	TUAHMADANI	SIPSN	2022	Good	4	29.121	10629.1	0.7457	0.0046	0.2263	0.0073	0.0161	21.7155	0.133957	6.59008	0.212583	0.468848	7926.17	48.8942	2405.38	77.5929	171.13
RIAU	KOTA PEKANBARU	KULIM	SIPSN	2022	Good	4	10.125	3695.55	0.7457	0.0046	0.2263	0.0073	0.0161	7.55021	0.046575	2.29129	0.0739125	0.163013	2755.83	16.9999	836.32	26.9781	59.4996
RIAU	KOTA PEKANBARU	RUMBAI TIMUR	SIPSN	2022	Good	4	6.467	2360.56	0.7457	0.0046	0.2263	0.0073	0.0161	4.82244	0.0297482	1.46348	0.0472091	0.104119	1760.19	10.8581	534.171	17.2313	38.0033
RIAU	KOTA DUMAI	DUMAI BARAT	SIPSN	2022	Good	4	4.4	1605.9	0.4827	0.0031	0.5111	0	0.0031	2.12388	0.01364	2.24884	0	0.01364	775.216	4.9786	820.827	0	4.9786
RIAU	KOTA DUMAI	DUMAI TIMUR	SIPSN	2022	Good	4	6.994	2552.67	0.4827	0.0031	0.5111	0	0.0031	3.376	0.0216814	3.57463	0	0.0216814	1232.24	7.91371	1304.74	0	7.91371
RIAU	KOTA DUMAI	BUKIT KAPUR	SIPSN	2022	Good	4	5.249	1915.73	0.4827	0.0031	0.5111	0	0.0031	2.53369	0.0162719	2.68276	0	0.0162719	924.798	5.93924	979.209	0	5.93924
RIAU	KOTA DUMAI	SUNGAI SEMBILAN	SIPSN	2022	Good	4	4.383	1599.88	0.4827	0.0031	0.5111	0	0.0031	2.11567	0.0135873	2.24015	0	0.0135873	772.221	4.95936	817.655	0	4.95936
RIAU	KOTA DUMAI	MEDANG KAMPAI	SIPSN	2022	Good	4	1.772	646.635	0.4827	0.0031	0.5111	0	0.0031	0.855344	0.0054932	0.905669	0	0.0054932	312.201	2.00502	330.569	0	2.00502
RIAU	KOTA DUMAI	DUMAI KOTA	SIPSN	2022	Good	4	4.074	1487.08	0.4827	0.0031	0.5111	0	0.0031	1.96652	0.0126294	2.08222	0	0.0126294	717.78	4.60973	760.011	0	4.60973
RIAU	KOTA DUMAI	DUMAI SELATAN	SIPSN	2022	Good	4	5.271	1924.09	0.4827	0.0031	0.5111	0	0.0031	2.54431	0.0163401	2.69401	0	0.0163401	928.674	5.96414	983.313	0	5.96414
JAMBI	KAB. KERINCI	GUNUNG RAYA	Average of Province	Filling Data	Worst	1	1.026	374.564	0.2323	0.0625	0.2541	0.4263	0.0248	0.23834	0.064125	0.260707	0.437384	0.0254448	86.994	23.4056	95.1579	159.645	9.28735
JAMBI	KAB. KERINCI	DANAU KERINCI	Average of Province	Filling Data	Worst	1	1.589	579.865	0.2323	0.0625	0.2541	0.4263	0.0248	0.369125	0.0993125	0.403765	0.677391	0.0394072	134.731	36.2491	147.374	247.248	14.3836
JAMBI	KAB. KERINCI	SITINJAU LAUT	Average of Province	Filling Data	Worst	1	1.191	434.751	0.2323	0.0625	0.2541	0.4263	0.0248	0.276669	0.0744375	0.302633	0.507723	0.0295368	100.984	27.1697	110.461	185.319	10.7809
JAMBI	KAB. KERINCI	AIR HANGAT	Average of Province	Filling Data	Worst	1	1.272	464.32	0.2323	0.0625	0.2541	0.4263	0.0248	0.295486	0.0795	0.323215	0.542254	0.0315456	107.852	29.0175	117.974	197.923	11.5141
JAMBI	KAB. KERINCI	GUNUNG KERINCI	Average of Province	Filling Data	Worst	1	1.529	558.024	0.2323	0.0625	0.2541	0.4263	0.0248	0.355187	0.0955625	0.388519	0.651813	0.0379192	129.643	34.8803	141.809	237.912	13.8405
JAMBI	KAB. KERINCI	BATANG MERANGIN	Average of Province	Filling Data	Worst	1	1.465	534.882	0.2323	0.0625	0.2541	0.4263	0.0248	0.34032	0.0915625	0.372257	0.62453	0.036332	124.217	33.4203	135.874	227.953	13.2612
JAMBI	KAB. KERINCI	KELILING DANAU	Average of Province	Filling Data	Worst	1	1.551	566.172	0.2323	0.0625	0.2541	0.4263	0.0248	0.360297	0.0969375	0.394109	0.661191	0.0384648	131.509	35.3822	143.85	241.335	14.0397
JAMBI	KAB. KERINCI	KAYU ARO	Average of Province	Filling Data	Worst	1	2.395	874.165	0.2323	0.0625	0.2541	0.4263	0.0248	0.556358	0.149688	0.60857	1.02099	0.059396	203.071	54.6359	222.128	372.661	21.6795
JAMBI	KAB. KERINCI	AIR HANGAT TIMUR	Average of Province	Filling Data	Worst	1	2.371	865.555	0.2323	0.0625	0.2541	0.4263	0.0248	0.550783	0.148187	0.602471	1.01076	0.0588008	201.036	54.0884	219.902	368.926	21.4623
JAMBI	KAB. KERINCI	GUNUNG TUJUH	Average of Province	Filling Data	Worst	1	1.824	665.925	0.2323	0.0625	0.2541	0.4263	0.0248	0.423715	0.114	0.463478	0.777571	0.0452352	154.656	41.61	169.17	283.813	16.5108
JAMBI	KAB. KERINCI	SIULAK	Average of Province	Filling Data	Worst	1	2.7	985.341	0.2323	0.0625	0.2541	0.4263	0.0248	0.62721	0.16875	0.68607	1.15101	0.06696	228.932	61.5938	250.416	420.119	24.4404
JAMBI	KAB. KERINCI	DEPATI TUJUH	Average of Province	Filling Data	Worst	1	1.999	729.682	0.2323	0.0625	0.2541	0.4263	0.0248	0.464368	0.124938	0.507946	0.852174	0.0495752	169.494	45.6022	185.4	311.043	18.0949
JAMBI	KAB. KERINCI	SIULAK MUKAI	Average of Province	Filling Data	Worst	1	1.355	494.603	0.2323	0.0625	0.2541	0.4263	0.0248	0.314767	0.0846875	0.344306	0.577636	0.033604	114.89	30.9109	125.672	210.837	12.2655
JAMBI	KAB. KERINCI	KAYU ARO BARAT	Average of Province	Filling Data	Worst	1	2.516	918.308	0.2323	0.0625	0.2541	0.4263	0.0248	0.584467	0.15725	0.639316	1.07257	0.0623968	213.33	57.3963	233.35	391.488	22.7748
JAMBI	KAB. KERINCI	BUKITKERMAN	Average of Province	Filling Data	Worst	1	1.573	574.027	0.2323	0.0625	0.2541	0.4263	0.0248	0.365408	0.0983125	0.399699	0.67057	0.0390104	133.374	35.8841	145.89	244.758	14.2388
JAMBI	KAB. KERINCI	AIR HANGAT BARAT	Average of Province	Filling Data	Worst	1	1.248	455.542	0.2323	0.0625	0.2541	0.4263	0.0248	0.28991	0.078	0.317117	0.532022	0.0309504	105.817	28.47	115.748	194.188	11.2969
JAMBI	KAB. KERINCI	TANAH COGOK	Average of Province	Filling Data	Worst	1	1.094	399.261	0.2323	0.0625	0.2541	0.4263	0.0248	0.254136	0.068375	0.277985	0.466372	0.0271312	92.7597	24.9569	101.465	170.226	9.90289
JAMBI	KAB. KERINCI	DANAU KERINCI BARAT	Average of Province	Filling Data	Worst	1	1.447	527.994	0.2323	0.0625	0.2541	0.4263	0.0248	0.336138	0.0904375	0.367683	0.616856	0.0358856	122.69	33.0097	134.204	225.152	13.0982
JAMBI	KAB. MERANGIN	JANGKAT	Average of Province	Filling Data	Worst	1	1.123	409.814	0.1138	0.0132	0.7224	0.0865	0.0641	0.127797	0.0148236	0.811255	0.0971395	0.0719843	46.6461	5.41061	296.108	35.4559	26.2743
JAMBI	KAB. MERANGIN	BANGKO	Average of Province	Filling Data	Worst	1	5.266	1922.27	0.1138	0.0132	0.7224	0.0865	0.0641	0.599271	0.0695112	3.80416	0.455509	0.337551	218.734	25.3716	1388.52	166.261	123.206
JAMBI	KAB. MERANGIN	MUARA SIAU	Average of Province	Filling Data	Worst	1	1.135	414.129	0.1138	0.0132	0.7224	0.0865	0.0641	0.129163	0.014982	0.819924	0.0981775	0.0727535	47.1445	5.46843	299.272	35.8348	26.555
JAMBI	KAB. MERANGIN	SUNGAI MANAU	Average of Province	Filling Data	Worst	1	1.186	432.724	0.1138	0.0132	0.7224	0.0865	0.0641	0.134967	0.0156552	0.856766	0.102589	0.0760226	49.2629	5.71415	312.72	37.445	27.7482
JAMBI	KAB. MERANGIN	TABIR	Average of Province	Filling Data	Worst	1	3.303	1205.43	0.1138	0.0132	0.7224	0.0865	0.0641	0.375881	0.0435996	2.38609	0.28571	0.211722	137.197	15.9139	870.922	104.284	77.2786
JAMBI	KAB. MERANGIN	PAMENANG	Average of Province	Filling Data	Worst	1	3.72	1357.78	0.1138	0.0132	0.7224	0.0865	0.0641	0.423336	0.049104	2.68733	0.32178	0.238452	154.518	17.923	980.875	117.45	87.035
JAMBI	KAB. MERANGIN	TABIR ULU	Average of Province	Filling Data	Worst	1	0.921	336.313	0.1138	0.0132	0.7224	0.0865	0.0641	0.10481	0.0121572	0.66533	0.0796665	0.0590361	38.2556	4.43738	242.846	29.0783	21.5482
JAMBI	KAB. MERANGIN	TABIR SELATAN	Average of Province	Filling Data	Worst	1	3.179	1160.18	0.1138	0.0132	0.7224	0.0865	0.0641	0.36177	0.0419628	2.29651	0.274983	0.203774	132.046	15.3164	838.226	100.369	74.3775
JAMBI	KAB. MERANGIN	LEMBAH MASURAI	Average of Province	Filling Data	Worst	1	1.721	628.105	0.1138	0.0132	0.7224	0.0865	0.0641	0.19585	0.0227172	1.24325	0.148867	0.110316	71.4852	8.29178	453.786	54.3363	40.2654
JAMBI	KAB. MERANGIN	BANGKO BARAT	Average of Province	Filling Data	Worst	1	1.203	439.1	0.1138	0.0132	0.7224	0.0865	0.0641	0.136901	0.0158796	0.869047	0.10406	0.0771123	49.969	5.79605	317.202	37.9817	28.146
JAMBI	KAB. MERANGIN	NALO TANTAN	Average of Province	Filling Data	Worst	1	2.033	742.08	0.1138	0.0132	0.7224	0.0865	0.0641	0.231355	0.0268356	1.46864	0.175854	0.130315	84.4447	9.79499	536.053	64.1869	47.5651
JAMBI	KAB. MERANGIN	BATANG MASUMAI	Average of Province	Filling Data	Worst	1	1.275	465.485	0.1138	0.0132	0.7224	0.0865	0.0641	0.145095	0.01683	0.92106	0.110287	0.0817275	52.9597	6.14295	336.187	40.2549	29.8305
JAMBI	KAB. MERANGIN	PAMENANG BARAT	Average of Province	Filling Data	Worst	1	1.913	698.322	0.1138	0.0132	0.7224	0.0865	0.0641	0.217699	0.0252516	1.38195	0.165475	0.122623	79.4603	9.21683	504.412	60.3982	44.7575
JAMBI	KAB. MERANGIN	TABIR ILIR	Average of Province	Filling Data	Worst	1	1.038	378.772	0.1138	0.0132	0.7224	0.0865	0.0641	0.118124	0.0137016	0.749851	0.089787	0.0665358	43.1154	5.00108	273.696	32.7723	24.2856
JAMBI	KAB. MERANGIN	TABIR TIMUR	Average of Province	Filling Data	Worst	1	0.859	313.556	0.1138	0.0132	0.7224	0.0865	0.0641	0.0977542	0.0113388	0.620542	0.0743035	0.0550619	35.6803	4.13866	226.498	27.1208	20.0976
JAMBI	KAB. MERANGIN	RENAH PEMBARAP	Average of Province	Filling Data	Worst	1	1.446	527.722	0.1138	0.0132	0.7224	0.0865	0.0641	0.164555	0.0190872	1.04459	0.125079	0.0926886	60.0625	6.96683	381.275	45.6538	33.8313
JAMBI	KAB. MERANGIN	PANGKALAN JAMBU	Average of Province	Filling Data	Worst	1	0.729	266.171	0.1138	0.0132	0.7224	0.0865	0.0641	0.0829602	0.0096228	0.52663	0.0630585	0.0467289	30.2805	3.51232	192.22	23.0164	17.056
JAMBI	KAB. MERANGIN	JANGKAT TIMUR	Average of Province	Filling Data	Worst	1	1.109	404.965	0.1138	0.0132	0.7224	0.0865	0.0641	0.126204	0.0146388	0.801142	0.0959285	0.0710869	46.0645	5.34316	292.417	35.0139	25.9467
JAMBI	KAB. MERANGIN	RENAH PAMENANG	Average of Province	Filling Data	Worst	1	1.546	564.416	0.1138	0.0132	0.7224	0.0865	0.0641	0.175935	0.0204072	1.11683	0.133729	0.0990986	64.2162	7.44863	407.643	48.8111	36.171
JAMBI	KAB. MERANGIN	PAMENANG SELATAN	Average of Province	Filling Data	Worst	1	1.153	420.811	0.1138	0.0132	0.7224	0.0865	0.0641	0.131211	0.0152196	0.832927	0.0997345	0.0739073	47.8922	5.55515	304.018	36.4031	26.9762
JAMBI	KAB. MERANGIN	MARGO TABIR	Average of Province	Filling Data	Worst	1	1.477	539.139	0.1138	0.0132	0.7224	0.0865	0.0641	0.168083	0.0194964	1.06698	0.127761	0.0946757	61.3501	7.11619	389.449	46.6326	34.5566
JAMBI	KAB. MERANGIN	TABIR LINTAS	Average of Province	Filling Data	Worst	1	0.897	327.302	0.1138	0.0132	0.7224	0.0865	0.0641	0.102079	0.0118404	0.647993	0.0775905	0.0574977	37.2587	4.32175	236.517	28.3205	20.9867
JAMBI	KAB. MERANGIN	TABIR BARAT	Average of Province	Filling Data	Worst	1	1.036	378.314	0.1138	0.0132	0.7224	0.0865	0.0641	0.117897	0.0136752	0.748406	0.089614	0.0664076	43.0323	4.99145	273.168	32.7091	24.2388
JAMBI	KAB. MERANGIN	TIANG PUMPUNG	Average of Province	Filling Data	Worst	1	0.517	188.851	0.1138	0.0132	0.7224	0.0865	0.0641	0.0588346	0.0068244	0.373481	0.0447205	0.0331397	21.4746	2.49091	136.32	16.323	12.096
JAMBI	KAB. SAROLANGUN	BATANG ASAI	SIPSN	2022	Good	4	1.451	529.626	0.31241	0.0773	0.60929	0	0.001	0.453307	0.112162	0.88408	0	0.001451	165.457	40.9392	322.689	0	0.529615
JAMBI	KAB. SAROLANGUN	LIMUN	SIPSN	2022	Good	4	1.402	511.732	0.31241	0.0773	0.60929	0	0.001	0.437999	0.108375	0.854225	0	0.001402	159.87	39.5567	311.792	0	0.51173
JAMBI	KAB. SAROLANGUN	SAROLANGUN	SIPSN	2022	Good	4	4.276	1560.8	0.31241	0.0773	0.60929	0	0.001	1.33586	0.330535	2.60532	0	0.004276	487.591	120.645	950.943	0	1.56074
JAMBI	KAB. SAROLANGUN	PAUH	SIPSN	2022	Good	4	1.876	684.8	0.31241	0.0773	0.60929	0	0.001	0.586081	0.145015	1.14303	0	0.001876	213.92	52.9304	417.205	0	0.68474
JAMBI	KAB. SAROLANGUN	PELAWAN	SIPSN	2022	Good	4	2.603	949.946	0.31241	0.0773	0.60929	0	0.001	0.813203	0.201212	1.58598	0	0.002603	296.819	73.4423	578.883	0	0.950095
JAMBI	KAB. SAROLANGUN	MANDIANGIN	SIPSN	2022	Good	4	1.814	662.013	0.31241	0.0773	0.60929	0	0.001	0.566712	0.140222	1.10525	0	0.001814	206.85	51.1811	403.417	0	0.66211
JAMBI	KAB. SAROLANGUN	AIR HITAM	SIPSN	2022	Good	4	1.914	698.52	0.31241	0.0773	0.60929	0	0.001	0.597953	0.147952	1.16618	0	0.001914	218.253	54.0026	425.656	0	0.69861
JAMBI	KAB. SAROLANGUN	BATHIN VIII	SIPSN	2022	Good	4	1.538	561.241	0.31241	0.0773	0.60929	0	0.001	0.480486	0.118887	0.937088	0	0.001538	175.378	43.3939	342.037	0	0.56137
JAMBI	KAB. SAROLANGUN	SINGKUT	SIPSN	2022	Good	4	3.032	1106.53	0.31241	0.0773	0.60929	0	0.001	0.947227	0.234374	1.84737	0	0.003032	345.738	85.5464	674.289	0	1.10668
JAMBI	KAB. SAROLANGUN	CERMIN NAN GEDANG	SIPSN	2022	Good	4	1.02	372.459	0.31241	0.0773	0.60929	0	0.001	0.318658	0.078846	0.621476	0	0.00102	116.31	28.7788	226.839	0	0.3723
JAMBI	KAB. SAROLANGUN	MANDIANGIN TIMUR	SIPSN	2022	Good	4	0.962	351.267	0.31241	0.0773	0.60929	0	0.001	0.300538	0.0743626	0.586137	0	0.000962	109.696	27.1423	213.94	0	0.35113
JAMBI	KAB. BATANGHARI	MERSAM	SIPSN	2020	Bad	2	2.559	934.1	0.0074	0.0101	0.8303	0.109	0.0432	0.0189366	0.0258459	2.12474	0.278931	0.110549	6.91186	9.43375	775.529	101.81	40.3503
JAMBI	KAB. BATANGHARI	MUARA TEMBESI	SIPSN	2020	Bad	2	2.688	981.197	0.0074	0.0101	0.8303	0.109	0.0432	0.0198912	0.0271488	2.23185	0.292992	0.116122	7.26029	9.90931	814.624	106.942	42.3844
JAMBI	KAB. BATANGHARI	MUARA BULIAN	SIPSN	2020	Bad	2	5.367	1958.89	0.0074	0.0101	0.8303	0.109	0.0432	0.0397158	0.0542067	4.45622	0.585003	0.231854	14.4963	19.7854	1626.52	213.526	84.6269
JAMBI	KAB. BATANGHARI	BATIN XXIV	SIPSN	2020	Bad	2	2.47	901.61	0.0074	0.0101	0.8303	0.109	0.0432	0.018278	0.024947	2.05084	0.26923	0.106704	6.67147	9.10566	748.557	98.269	38.947
JAMBI	KAB. BATANGHARI	PEMAYUNG	SIPSN	2020	Bad	2	2.892	1055.7	0.0074	0.0101	0.8303	0.109	0.0432	0.0214008	0.0292092	2.40123	0.315228	0.124934	7.81129	10.6614	876.448	115.058	45.6011
JAMBI	KAB. BATANGHARI	MARO SEBO ULU	SIPSN	2020	Bad	2	2.976	1086.3	0.0074	0.0101	0.8303	0.109	0.0432	0.0220224	0.0300576	2.47097	0.324384	0.128563	8.03818	10.971	901.905	118.4	46.9256
JAMBI	KAB. BATANGHARI	BAJUBANG	SIPSN	2020	Bad	2	3.255	1188.22	0.0074	0.0101	0.8303	0.109	0.0432	0.024087	0.0328755	2.70263	0.354795	0.140616	8.79176	11.9996	986.459	129.5	51.3248
JAMBI	KAB. BATANGHARI	MARO SEBO ILIR	SIPSN	2020	Bad	2	1.188	433.588	0.0074	0.0101	0.8303	0.109	0.0432	0.0087912	0.0119988	0.986396	0.129492	0.0513216	3.20879	4.37956	360.035	47.2646	18.7324
JAMBI	KAB. MUARO JAMBI	JAMBI LUAR KOTA	Average of Province	Filling Data	Worst	1	5.486	2002.49	0.0905	0.0114	0.836	0.0498	0.0123	0.496483	0.0625404	4.5863	0.273203	0.0674778	181.216	22.8272	1674	99.719	24.6294
JAMBI	KAB. MUARO JAMBI	SEKERNAN	Average of Province	Filling Data	Worst	1	3.735	1363.38	0.0905	0.0114	0.836	0.0498	0.0123	0.338018	0.042579	3.12246	0.186003	0.0459405	123.376	15.5413	1139.7	67.8911	16.7683
JAMBI	KAB. MUARO JAMBI	KUMPEH	Average of Province	Filling Data	Worst	1	2.033	741.91	0.0905	0.0114	0.836	0.0498	0.0123	0.183987	0.0231762	1.69959	0.101243	0.0250059	67.1551	8.45931	620.35	36.9538	9.12715
JAMBI	KAB. MUARO JAMBI	MARO SEBO	Average of Province	Filling Data	Worst	1	1.775	647.883	0.0905	0.0114	0.836	0.0498	0.0123	0.160638	0.020235	1.4839	0.088395	0.0218325	58.6327	7.38577	541.623	32.2642	7.96886
JAMBI	KAB. MUARO JAMBI	MESTONG	Average of Province	Filling Data	Worst	1	3.283	1198.38	0.0905	0.0114	0.836	0.0498	0.0123	0.297112	0.0374262	2.74459	0.163493	0.0403809	108.446	13.6606	1001.77	59.6751	14.739
JAMBI	KAB. MUARO JAMBI	KUMPEH ULU	Average of Province	Filling Data	Worst	1	4.839	1766.23	0.0905	0.0114	0.836	0.0498	0.0123	0.43793	0.0551646	4.0454	0.240982	0.0595197	159.844	20.1351	1476.57	87.9585	21.7247
JAMBI	KAB. MUARO JAMBI	SUNGAI BAHAR	Average of Province	Filling Data	Worst	1	2.323	848.071	0.0905	0.0114	0.836	0.0498	0.0123	0.210232	0.0264822	1.94203	0.115685	0.0285729	76.7345	9.666	708.84	42.2252	10.4291
JAMBI	KAB. MUARO JAMBI	SUNGAI GELAM	Average of Province	Filling Data	Worst	1	5.724	2089.27	0.0905	0.0114	0.836	0.0498	0.0123	0.518022	0.0652536	4.78526	0.285055	0.0704052	189.078	23.8176	1746.62	104.045	25.6979
JAMBI	KAB. MUARO JAMBI	BAHAR UTARA	Average of Province	Filling Data	Worst	1	1.098	400.904	0.0905	0.0114	0.836	0.0498	0.0123	0.099369	0.0125172	0.917928	0.0546804	0.0135054	36.2697	4.56878	335.044	19.9583	4.92947
JAMBI	KAB. MUARO JAMBI	BAHAR SELATAN	Average of Province	Filling Data	Worst	1	1.36	496.541	0.0905	0.0114	0.836	0.0498	0.0123	0.12308	0.015504	1.13696	0.067728	0.016728	44.9242	5.65896	414.99	24.7207	6.10572
JAMBI	KAB. MUARO JAMBI	TAMAN RAJO	Average of Province	Filling Data	Worst	1	1.098	400.821	0.0905	0.0114	0.836	0.0498	0.0123	0.099369	0.0125172	0.917928	0.0546804	0.0135054	36.2697	4.56878	335.044	19.9583	4.92947
JAMBI	KAB. TANJUNG JABUNG BARAT	TUNGKAL ULU	SIPSN	2020	Bad	2	1.414	516.039	0.0411	0.011	0.6028	0.1569	0.1882	0.0581154	0.015554	0.852359	0.221857	0.266115	21.2121	5.67721	311.111	80.9777	97.1319
JAMBI	KAB. TANJUNG JABUNG BARAT	TUNGKAL ILIR	SIPSN	2020	Bad	2	7.295	2662.65	0.0411	0.011	0.6028	0.1569	0.1882	0.299825	0.080245	4.39743	1.14459	1.37292	109.436	29.2894	1605.06	417.774	501.115
JAMBI	KAB. TANJUNG JABUNG BARAT	PENGABUAN	SIPSN	2020	Bad	2	2.573	939.279	0.0411	0.011	0.6028	0.1569	0.1882	0.10575	0.028303	1.551	0.403704	0.484239	38.5989	10.3306	566.117	147.352	176.747
JAMBI	KAB. TANJUNG JABUNG BARAT	BETARA	SIPSN	2020	Bad	2	2.931	1069.89	0.0411	0.011	0.6028	0.1569	0.1882	0.120464	0.032241	1.76681	0.459874	0.551614	43.9694	11.768	644.884	167.854	201.339
JAMBI	KAB. TANJUNG JABUNG BARAT	MERLUNG	SIPSN	2020	Bad	2	1.577	575.697	0.0411	0.011	0.6028	0.1569	0.1882	0.0648147	0.017347	0.950616	0.247431	0.296791	23.6574	6.33166	346.975	90.3124	108.329
JAMBI	KAB. TANJUNG JABUNG BARAT	TEBING TINGGI	SIPSN	2020	Bad	2	3.533	1289.48	0.0411	0.011	0.6028	0.1569	0.1882	0.145206	0.038863	2.12969	0.554328	0.664911	53.0003	14.185	777.338	202.33	242.692
JAMBI	KAB. TANJUNG JABUNG BARAT	BATANG ASAM	SIPSN	2020	Bad	2	3.297	1203.44	0.0411	0.011	0.6028	0.1569	0.1882	0.135507	0.036267	1.98743	0.517299	0.620495	49.4599	13.2375	725.413	188.814	226.481
JAMBI	KAB. TANJUNG JABUNG BARAT	RENAH MENDALUH	SIPSN	2020	Bad	2	1.503	548.576	0.0411	0.011	0.6028	0.1569	0.1882	0.0617733	0.016533	0.906008	0.235821	0.282865	22.5473	6.03454	330.693	86.0746	103.246
JAMBI	KAB. TANJUNG JABUNG BARAT	MUARA PAPALIK	SIPSN	2020	Bad	2	1.015	370.415	0.0411	0.011	0.6028	0.1569	0.1882	0.0417165	0.011165	0.611842	0.159253	0.191023	15.2265	4.07522	223.322	58.1275	69.7234
JAMBI	KAB. TANJUNG JABUNG BARAT	SEBERANG KOTA	SIPSN	2020	Bad	2	0.887	323.75	0.0411	0.011	0.6028	0.1569	0.1882	0.0364557	0.009757	0.534684	0.13917	0.166933	13.3063	3.56131	195.16	50.7972	60.9307
JAMBI	KAB. TANJUNG JABUNG BARAT	BRAM ITAM	SIPSN	2020	Bad	2	1.864	680.498	0.0411	0.011	0.6028	0.1569	0.1882	0.0766104	0.020504	1.12362	0.292462	0.350805	27.9628	7.48396	410.121	106.748	128.044
JAMBI	KAB. TANJUNG JABUNG BARAT	KUALA BETARA	SIPSN	2020	Bad	2	1.344	490.405	0.0411	0.011	0.6028	0.1569	0.1882	0.0552384	0.014784	0.810163	0.210874	0.252941	20.162	5.39616	295.71	76.9689	92.3234
JAMBI	KAB. TANJUNG JABUNG BARAT	SENYERANG	SIPSN	2020	Bad	2	2.441	890.914	0.0411	0.011	0.6028	0.1569	0.1882	0.100325	0.026851	1.47143	0.382993	0.459396	36.6187	9.80062	537.074	139.792	167.68
JAMBI	KAB. TANJUNG JABUNG TIMUR	MUARA SABAK TIMUR	Average of Province	Filling Data	Worst	1	3.177	1159.43	0.2101	0.0224	0.6361	0.0862	0.0452	0.667488	0.0711648	2.02089	0.273857	0.1436	243.633	25.9752	737.625	99.958	52.4141
JAMBI	KAB. TANJUNG JABUNG TIMUR	NIPAH PANJANG	Average of Province	Filling Data	Worst	1	2.592	945.97	0.2101	0.0224	0.6361	0.0862	0.0452	0.544579	0.0580608	1.64877	0.22343	0.117158	198.771	21.1922	601.801	81.5521	42.7628
JAMBI	KAB. TANJUNG JABUNG TIMUR	MENDAHARA	Average of Province	Filling Data	Worst	1	2.579	941.368	0.2101	0.0224	0.6361	0.0862	0.0452	0.541848	0.0577696	1.6405	0.22231	0.116571	197.774	21.0859	598.783	81.1431	42.5483
JAMBI	KAB. TANJUNG JABUNG TIMUR	RANTAU RASAU	Average of Province	Filling Data	Worst	1	2.506	914.601	0.2101	0.0224	0.6361	0.0862	0.0452	0.526511	0.0561344	1.59407	0.216017	0.113271	192.176	20.4891	581.834	78.8463	41.344
JAMBI	KAB. TANJUNG JABUNG TIMUR	S A D U	Average of Province	Filling Data	Worst	1	1.307	477.234	0.2101	0.0224	0.6361	0.0862	0.0452	0.274601	0.0292768	0.831383	0.112663	0.0590764	100.229	10.686	303.455	41.1221	21.5629
JAMBI	KAB. TANJUNG JABUNG TIMUR	DENDANG	Average of Province	Filling Data	Worst	1	1.651	602.606	0.2101	0.0224	0.6361	0.0862	0.0452	0.346875	0.0369824	1.0502	0.142316	0.0746252	126.609	13.4986	383.323	51.9454	27.2382
JAMBI	KAB. TANJUNG JABUNG TIMUR	MUARA SABAK BARAT	Average of Province	Filling Data	Worst	1	2.252	821.838	0.2101	0.0224	0.6361	0.0862	0.0452	0.473145	0.0504448	1.4325	0.194122	0.10179	172.698	18.4124	522.861	70.8547	37.1535
JAMBI	KAB. TANJUNG JABUNG TIMUR	KUALA JAMBI	Average of Province	Filling Data	Worst	1	1.422	519.083	0.2101	0.0224	0.6361	0.0862	0.0452	0.298762	0.0318528	0.904534	0.122576	0.0642744	109.048	11.6263	330.155	44.7404	23.4602
JAMBI	KAB. TANJUNG JABUNG TIMUR	MENDAHARA ULU	Average of Province	Filling Data	Worst	1	1.675	611.457	0.2101	0.0224	0.6361	0.0862	0.0452	0.351918	0.03752	1.06547	0.144385	0.07571	128.45	13.6948	388.896	52.7005	27.6341
JAMBI	KAB. TANJUNG JABUNG TIMUR	GERAGAI	Average of Province	Filling Data	Worst	1	2.627	958.929	0.2101	0.0224	0.6361	0.0862	0.0452	0.551933	0.0588448	1.67103	0.226447	0.11874	201.455	21.4784	609.928	82.6533	43.3402
JAMBI	KAB. TANJUNG JABUNG TIMUR	BERBAK	Average of Province	Filling Data	Worst	1	1.05	383.161	0.2101	0.0224	0.6361	0.0862	0.0452	0.220605	0.02352	0.667905	0.09051	0.04746	80.5208	8.5848	243.785	33.0361	17.3229
JAMBI	KAB. BUNGO	TANAH TUMBUH	SIPSN	2022	Good	4	1.217	444.304	0.0518	0.002	0.8835	0.0578	0.0049	0.0630406	0.002434	1.07522	0.0703426	0.0059633	23.0098	0.88841	392.455	25.675	2.1766
JAMBI	KAB. BUNGO	RANTAU PANDAN	SIPSN	2022	Good	4	0.854	311.666	0.0518	0.002	0.8835	0.0578	0.0049	0.0442372	0.001708	0.754509	0.0493612	0.0041846	16.1466	0.62342	275.396	18.0168	1.52738
JAMBI	KAB. BUNGO	PASAR MUARO BUNGO	SIPSN	2022	Good	4	1.71	624.236	0.0518	0.002	0.8835	0.0578	0.0049	0.088578	0.00342	1.51079	0.098838	0.008379	32.331	1.2483	551.437	36.0759	3.05833
JAMBI	KAB. BUNGO	JUJUHAN	SIPSN	2022	Good	4	1.525	556.591	0.0518	0.002	0.8835	0.0578	0.0049	0.078995	0.00305	1.34734	0.088145	0.0074725	28.8332	1.11325	491.778	32.1729	2.72746
JAMBI	KAB. BUNGO	TANAH SEPENGGAL	SIPSN	2022	Good	4	1.959	715.179	0.0518	0.002	0.8835	0.0578	0.0049	0.101476	0.003918	1.73078	0.11323	0.0095991	37.0388	1.43007	631.733	41.329	3.50367
JAMBI	KAB. BUNGO	PELEPAT	SIPSN	2022	Good	4	2.851	1040.43	0.0518	0.002	0.8835	0.0578	0.0049	0.147682	0.005702	2.51886	0.164788	0.0139699	53.9039	2.08123	919.383	60.1475	5.09901
JAMBI	KAB. BUNGO	LIMBUR LUBUK MENGKUANG	SIPSN	2022	Good	4	1.353	494.018	0.0518	0.002	0.8835	0.0578	0.0049	0.0700854	0.002706	1.19538	0.0782034	0.0066297	25.5812	0.98769	436.312	28.5442	2.41984
JAMBI	KAB. BUNGO	MUKO-MUKO BATHIN VII	SIPSN	2022	Good	4	1.26	459.962	0.0518	0.002	0.8835	0.0578	0.0049	0.065268	0.00252	1.11321	0.072828	0.006174	23.8228	0.9198	406.322	26.5822	2.25351
JAMBI	KAB. BUNGO	PELEPAT ILIR	SIPSN	2022	Good	4	4.138	1510.31	0.0518	0.002	0.8835	0.0578	0.0049	0.214348	0.008276	3.65592	0.239176	0.0202762	78.2372	3.02074	1334.41	87.2994	7.40081
JAMBI	KAB. BUNGO	BATIN II BABEKO	SIPSN	2022	Good	4	1.174	428.355	0.0518	0.002	0.8835	0.0578	0.0049	0.0608132	0.002348	1.03723	0.0678572	0.0057526	22.1968	0.85702	378.589	24.7679	2.0997
JAMBI	KAB. BUNGO	BATHIN III	SIPSN	2022	Good	4	2.127	776.527	0.0518	0.002	0.8835	0.0578	0.0049	0.110179	0.004254	1.8792	0.122941	0.0104223	40.2152	1.55271	685.91	44.8733	3.80414
JAMBI	KAB. BUNGO	BUNGO DANI	SIPSN	2022	Good	4	2.2	802.827	0.0518	0.002	0.8835	0.0578	0.0049	0.11396	0.0044	1.9437	0.12716	0.01078	41.5954	1.606	709.451	46.4134	3.9347
JAMBI	KAB. BUNGO	RIMBO TENGAH	SIPSN	2022	Good	4	2.681	978.502	0.0518	0.002	0.8835	0.0578	0.0049	0.138876	0.005362	2.36866	0.154962	0.0131369	50.6897	1.95713	864.562	56.5611	4.79497
JAMBI	KAB. BUNGO	BATHIN III ULU	SIPSN	2022	Good	4	0.771	281.546	0.0518	0.002	0.8835	0.0578	0.0049	0.0399378	0.001542	0.681179	0.0445638	0.0037779	14.5773	0.56283	248.63	16.2658	1.37893
JAMBI	KAB. BUNGO	BATHIN II PELAYANG	SIPSN	2022	Good	4	0.724	264.081	0.0518	0.002	0.8835	0.0578	0.0049	0.0375032	0.001448	0.639654	0.0418472	0.0035476	13.6887	0.52852	233.474	15.2742	1.29487
JAMBI	KAB. BUNGO	JUJUHAN ILIR	SIPSN	2022	Good	4	0.82	299.303	0.0518	0.002	0.8835	0.0578	0.0049	0.042476	0.00164	0.72447	0.047396	0.004018	15.5037	0.5986	264.432	17.2995	1.46657
JAMBI	KAB. BUNGO	TANAH SEPENGGAL LINTAS	SIPSN	2022	Good	4	1.982	723.285	0.0518	0.002	0.8835	0.0578	0.0049	0.102668	0.003964	1.7511	0.11456	0.0097118	37.4737	1.44686	639.15	41.8143	3.54481
JAMBI	KAB. TEBO	TEBO TENGAH	SIPSN	2020	Bad	2	4.094	1494.48	0.1489	0.0028	0.6953	0.1408	0.0122	0.609597	0.0114632	2.84656	0.576435	0.0499468	222.503	4.18407	1038.99	210.399	18.2306
JAMBI	KAB. TEBO	TEBO ILIR	SIPSN	2020	Bad	2	2.883	1052.4	0.1489	0.0028	0.6953	0.1408	0.0122	0.429279	0.0080724	2.00455	0.405926	0.0351726	156.687	2.94643	731.661	148.163	12.838
JAMBI	KAB. TEBO	TEBO ULU	SIPSN	2020	Bad	2	3.348	1222.17	0.1489	0.0028	0.6953	0.1408	0.0122	0.498517	0.0093744	2.32786	0.471398	0.0408456	181.959	3.42166	849.671	172.06	14.9086
JAMBI	KAB. TEBO	RIMBO BUJANG	SIPSN	2020	Bad	2	6.329	2310.22	0.1489	0.0028	0.6953	0.1408	0.0122	0.942388	0.0177212	4.40055	0.891123	0.0772138	343.972	6.46824	1606.2	325.26	28.183
JAMBI	KAB. TEBO	SUMAY	SIPSN	2020	Bad	2	2.438	889.746	0.1489	0.0028	0.6953	0.1408	0.0122	0.363018	0.0068264	1.69514	0.34327	0.0297436	132.502	2.49164	618.727	125.294	10.8564
JAMBI	KAB. TEBO	VII KOTO	SIPSN	2020	Bad	2	1.954	713.178	0.1489	0.0028	0.6953	0.1408	0.0122	0.290951	0.0054712	1.35862	0.275123	0.0238388	106.197	1.99699	495.895	100.42	8.70116
JAMBI	KAB. TEBO	RIMBO ULU	SIPSN	2020	Bad	2	3.749	1368.25	0.1489	0.0028	0.6953	0.1408	0.0122	0.558226	0.0104972	2.60668	0.527859	0.0457378	203.753	3.83148	951.438	192.669	16.6943
JAMBI	KAB. TEBO	RIMBO ILIR	SIPSN	2020	Bad	2	2.317	845.56	0.1489	0.0028	0.6953	0.1408	0.0122	0.345001	0.0064876	1.61101	0.326234	0.0282674	125.925	2.36797	588.019	119.075	10.3176
JAMBI	KAB. TEBO	TENGAH ILIR	SIPSN	2020	Bad	2	2.719	992.6	0.1489	0.0028	0.6953	0.1408	0.0122	0.404859	0.0076132	1.89052	0.382835	0.0331718	147.774	2.77882	690.04	139.735	12.1077
JAMBI	KAB. TEBO	SERAI SERUMPUN	SIPSN	2020	Bad	2	1.063	387.87	0.1489	0.0028	0.6953	0.1408	0.0122	0.158281	0.0029764	0.739104	0.14967	0.0129686	57.7725	1.08639	269.773	54.6297	4.73354
JAMBI	KAB. TEBO	VII KOTO ILIR	SIPSN	2020	Bad	2	1.915	698.98	0.1489	0.0028	0.6953	0.1408	0.0122	0.285143	0.005362	1.3315	0.269632	0.023363	104.077	1.95713	485.997	98.4157	8.5275
JAMBI	KAB. TEBO	MUARA TABIR	SIPSN	2020	Bad	2	1.808	659.963	0.1489	0.0028	0.6953	0.1408	0.0122	0.269211	0.0050624	1.2571	0.254566	0.0220576	98.2621	1.84778	458.842	92.9167	8.05102
JAMBI	KOTA JAMBI	TELANAIPURA	SIPSN	2022	Good	4	7.309	2667.75	0.908581	0	0.0854193	0.0029	0.0031	6.64082	0	0.62433	0.0211961	0.0226579	2423.9	0	227.88	7.73658	8.27013
JAMBI	KOTA JAMBI	JAMBI SELATAN	SIPSN	2022	Good	4	7.876	2874.83	0.908581	0	0.0854193	0.0029	0.0031	7.15598	0	0.672762	0.0228404	0.0244156	2611.93	0	245.558	8.33675	8.91169
JAMBI	KOTA JAMBI	JAMBI TIMUR	SIPSN	2022	Good	4	8.99	3281.4	0.908581	0	0.0854193	0.0029	0.0031	8.16814	0	0.767919	0.026071	0.027869	2981.37	0	280.291	9.51591	10.1722
JAMBI	KOTA JAMBI	PASAR JAMBI	SIPSN	2022	Good	4	1.528	557.757	0.908581	0	0.0854193	0.0029	0.0031	1.38831	0	0.130521	0.0044312	0.0047368	506.734	0	47.64	1.61739	1.72893
JAMBI	KOTA JAMBI	PELAYANGAN	SIPSN	2022	Good	4	1.824	665.872	0.908581	0	0.0854193	0.0029	0.0031	1.65725	0	0.155805	0.0052896	0.0056544	604.897	0	56.8687	1.9307	2.06386
JAMBI	KOTA JAMBI	DANAU TELUK	SIPSN	2022	Good	4	1.791	653.686	0.908581	0	0.0854193	0.0029	0.0031	1.62727	0	0.152986	0.0051939	0.0055521	593.953	0	55.8399	1.89577	2.02652
JAMBI	KOTA JAMBI	KOTA BARU	SIPSN	2022	Good	4	11.546	4214.26	0.908581	0	0.0854193	0.0029	0.0031	10.4905	0	0.986251	0.0334834	0.0357926	3829.02	0	359.982	12.2214	13.0643
JAMBI	KOTA JAMBI	JELUTUNG	SIPSN	2022	Good	4	8.136	2969.78	0.908581	0	0.0854193	0.0029	0.0031	7.39221	0	0.694971	0.0235944	0.0252216	2698.16	0	253.665	8.61196	9.20588
JAMBI	KOTA JAMBI	ALAM BARAJO	SIPSN	2022	Good	4	14.688	5361.29	0.908581	0	0.0854193	0.0029	0.0031	13.3452	0	1.25464	0.0425952	0.0455328	4871.01	0	457.943	15.5472	16.6195
JAMBI	KOTA JAMBI	DANAU SIPIN	SIPSN	2022	Good	4	5.821	2124.77	0.908581	0	0.0854193	0.0029	0.0031	5.28885	0	0.497226	0.0168809	0.0180451	1930.43	0	181.487	6.16153	6.58646
JAMBI	KOTA JAMBI	PAAL MERAH	SIPSN	2022	Good	4	14.776	5393.25	0.908581	0	0.0854193	0.0029	0.0031	13.4252	0	1.26216	0.0428504	0.0458056	4900.19	0	460.687	15.6404	16.719
JAMBI	KOTA SUNGAI PENUH	SUNGAI PENUH	SIPSN	2022	Good	4	1.02	372.383	0.7688	0.0005	0.1182	0.0923	0.0202	0.784176	0.00051	0.120564	0.094146	0.020604	286.224	0.18615	44.0059	34.3633	7.52046
JAMBI	KOTA SUNGAI PENUH	PESISIR BUKIT	SIPSN	2022	Good	4	1.236	451.205	0.7688	0.0005	0.1182	0.0923	0.0202	0.950237	0.000618	0.146095	0.114083	0.0249672	346.836	0.22557	53.3247	41.6402	9.11303
JAMBI	KOTA SUNGAI PENUH	HAMPARAN RAWANG	SIPSN	2022	Good	4	1.522	555.665	0.7688	0.0005	0.1182	0.0923	0.0202	1.17011	0.000761	0.1799	0.140481	0.0307444	427.091	0.277765	65.6636	51.2754	11.2217
JAMBI	KOTA SUNGAI PENUH	TANAH KAMPUNG	SIPSN	2022	Good	4	1.055	385.15	0.7688	0.0005	0.1182	0.0923	0.0202	0.811084	0.0005275	0.124701	0.0973765	0.021311	296.046	0.192538	45.5159	35.5424	7.77851
JAMBI	KOTA SUNGAI PENUH	KUMUN DEBAI	SIPSN	2022	Good	4	1.054	384.55	0.7688	0.0005	0.1182	0.0923	0.0202	0.810315	0.000527	0.124583	0.0972842	0.0212908	295.765	0.192355	45.4727	35.5087	7.77114
JAMBI	KOTA SUNGAI PENUH	PONDOK TINGGI	SIPSN	2022	Good	4	1.811	660.937	0.7688	0.0005	0.1182	0.0923	0.0202	1.3923	0.0009055	0.21406	0.167155	0.0365822	508.188	0.330507	78.132	61.0117	13.3525
JAMBI	KOTA SUNGAI PENUH	KOTO BARU	SIPSN	2022	Good	4	0.941	343.57	0.7688	0.0005	0.1182	0.0923	0.0202	0.723441	0.0004705	0.111226	0.0868543	0.0190082	264.056	0.171733	40.5976	31.7018	6.93799
JAMBI	KOTA SUNGAI PENUH	SUNGAI BUNGKAL	SIPSN	2022	Good	4	1.067	389.346	0.7688	0.0005	0.1182	0.0923	0.0202	0.82031	0.0005335	0.126119	0.0984841	0.0215534	299.413	0.194727	46.0336	35.9467	7.86699
SUMATERA SELATAN	KAB. OGAN KOMERING ULU	SOSOH BUAY RAYAP	SIPSN	2022	Good	4	1.078	393.49	0.3045	0.0154	0.4682	0.0962	0.1157	0.328251	0.0166012	0.50472	0.103704	0.124725	119.812	6.05944	184.223	37.8518	45.5245
SUMATERA SELATAN	KAB. OGAN KOMERING ULU	PENGANDONAN	SIPSN	2022	Good	4	0.792	289.244	0.3045	0.0154	0.4682	0.0962	0.1157	0.241164	0.0121968	0.370814	0.0761904	0.0916344	88.0249	4.45183	135.347	27.8095	33.4466
SUMATERA SELATAN	KAB. OGAN KOMERING ULU	PENINJAUAN	SIPSN	2022	Good	4	2.506	914.717	0.3045	0.0154	0.4682	0.0962	0.1157	0.763077	0.0385924	1.17331	0.241077	0.289944	278.523	14.0862	428.258	87.9932	105.83
SUMATERA SELATAN	KAB. OGAN KOMERING ULU	BATURAJA BARAT	SIPSN	2022	Good	4	2.892	1055.48	0.3045	0.0154	0.4682	0.0962	0.1157	0.880614	0.0445368	1.35403	0.27821	0.334604	321.424	16.2559	494.223	101.547	122.131
SUMATERA SELATAN	KAB. OGAN KOMERING ULU	BATURAJA TIMUR	SIPSN	2022	Good	4	8.193	2990.58	0.3045	0.0154	0.4682	0.0962	0.1157	2.49477	0.126172	3.83596	0.788167	0.94793	910.591	46.0529	1400.13	287.681	345.994
SUMATERA SELATAN	KAB. OGAN KOMERING ULU	ULU OGAN	SIPSN	2022	Good	4	0.674	245.896	0.3045	0.0154	0.4682	0.0962	0.1157	0.205233	0.0103796	0.315567	0.0648388	0.0779818	74.91	3.78855	115.182	23.6662	28.4634
SUMATERA SELATAN	KAB. OGAN KOMERING ULU	SEMIDANG AJI	SIPSN	2022	Good	4	2.259	824.634	0.3045	0.0154	0.4682	0.0962	0.1157	0.687865	0.0347886	1.05766	0.217316	0.261366	251.071	12.6978	386.047	79.3203	95.3987
SUMATERA SELATAN	KAB. OGAN KOMERING ULU	LUBUK BATANG	SIPSN	2022	Good	4	2.594	946.791	0.3045	0.0154	0.4682	0.0962	0.1157	0.789873	0.0399476	1.21451	0.249543	0.300126	288.304	14.5809	443.296	91.0831	109.546
SUMATERA SELATAN	KAB. OGAN KOMERING ULU	LENGKITI	SIPSN	2022	Good	4	1.983	723.804	0.3045	0.0154	0.4682	0.0962	0.1157	0.603824	0.0305382	0.928441	0.190765	0.229433	220.396	11.1464	338.881	69.6291	83.7431
SUMATERA SELATAN	KAB. OGAN KOMERING ULU	SINAR PENINJAUAN	SIPSN	2022	Good	4	1.751	639.275	0.3045	0.0154	0.4682	0.0962	0.1157	0.533179	0.0269654	0.819818	0.168446	0.202591	194.611	9.84237	299.234	61.4829	73.9456
SUMATERA SELATAN	KAB. OGAN KOMERING ULU	LUBUK RAJA	SIPSN	2022	Good	4	2.37	864.983	0.3045	0.0154	0.4682	0.0962	0.1157	0.721665	0.036498	1.10963	0.227994	0.274209	263.408	13.3218	405.016	83.2178	100.086
SUMATERA SELATAN	KAB. OGAN KOMERING ULU	MUARA JAYA	SIPSN	2022	Good	4	0.582	212.518	0.3045	0.0154	0.4682	0.0962	0.1157	0.177219	0.0089628	0.272492	0.0559884	0.0673374	64.6849	3.27142	99.4597	20.4358	24.5782
SUMATERA SELATAN	KAB. OGAN KOMERING ULU	KEDATON PENINJAUAN RAYA	SIPSN	2022	Good	4	1.005	366.942	0.3045	0.0154	0.4682	0.0962	0.1157	0.306022	0.015477	0.470541	0.096681	0.116278	111.698	5.6491	171.747	35.2886	42.4417
SUMATERA SELATAN	KAB. OGAN KOMERING ILIR	TANJUNG LUBUK	Average of Province	Filling Data	Worst	1	2.667	973.283	0.0573	0.1121	0.6106	0.186	0.034	0.152819	0.298971	1.62847	0.496062	0.090678	55.779	109.124	594.392	181.063	33.0975
SUMATERA SELATAN	KAB. OGAN KOMERING ILIR	PEDAMARAN	Average of Province	Filling Data	Worst	1	3.521	1285.08	0.0573	0.1121	0.6106	0.186	0.034	0.201753	0.394704	2.14992	0.654906	0.119714	73.64	144.067	784.722	239.041	43.6956
SUMATERA SELATAN	KAB. OGAN KOMERING ILIR	MESUJI	Average of Province	Filling Data	Worst	1	3.335	1217.37	0.0573	0.1121	0.6106	0.186	0.034	0.191095	0.373854	2.03635	0.62031	0.11339	69.7499	136.457	743.268	226.413	41.3874
SUMATERA SELATAN	KAB. OGAN KOMERING ILIR	KAYU AGUNG	Average of Province	Filling Data	Worst	1	5.864	2140.51	0.0573	0.1121	0.6106	0.186	0.034	0.336007	0.657354	3.58056	1.0907	0.199376	122.643	239.934	1306.9	398.107	72.7722
SUMATERA SELATAN	KAB. OGAN KOMERING ILIR	SIRAH PULAU PADANG	Average of Province	Filling Data	Worst	1	3.444	1257.14	0.0573	0.1121	0.6106	0.186	0.034	0.197341	0.386072	2.10291	0.640584	0.117096	72.0295	140.916	767.561	233.813	42.74
SUMATERA SELATAN	KAB. OGAN KOMERING ILIR	TULUNG SELAPAN	Average of Province	Filling Data	Worst	1	3.513	1282.27	0.0573	0.1121	0.6106	0.186	0.034	0.201295	0.393807	2.14504	0.653418	0.119442	73.4726	143.74	782.939	238.498	43.5963
SUMATERA SELATAN	KAB. OGAN KOMERING ILIR	PAMPANGAN	Average of Province	Filling Data	Worst	1	2.301	839.935	0.0573	0.1121	0.6106	0.186	0.034	0.131847	0.257942	1.40499	0.427986	0.078234	48.1243	94.1489	512.822	156.215	28.5554
SUMATERA SELATAN	KAB. OGAN KOMERING ILIR	LEMPUING	Average of Province	Filling Data	Worst	1	5.601	2044.37	0.0573	0.1121	0.6106	0.186	0.034	0.320937	0.627872	3.41997	1.04179	0.190434	117.142	229.173	1248.29	380.252	69.5084
SUMATERA SELATAN	KAB. OGAN KOMERING ILIR	AIR SUGIHAN	Average of Province	Filling Data	Worst	1	2.64	963.675	0.0573	0.1121	0.6106	0.186	0.034	0.151272	0.295944	1.61198	0.49104	0.08976	55.2143	108.02	588.374	179.23	32.7624
SUMATERA SELATAN	KAB. OGAN KOMERING ILIR	SUNGAI MENANG	Average of Province	Filling Data	Worst	1	2.407	878.479	0.0573	0.1121	0.6106	0.186	0.034	0.137921	0.269825	1.46971	0.447702	0.081838	50.3412	98.486	536.446	163.411	29.8709
SUMATERA SELATAN	KAB. OGAN KOMERING ILIR	JEJAWI	Average of Province	Filling Data	Worst	1	3.027	1104.88	0.0573	0.1121	0.6106	0.186	0.034	0.173447	0.339327	1.84829	0.563022	0.102918	63.3082	123.854	674.624	205.503	37.5651
SUMATERA SELATAN	KAB. OGAN KOMERING ILIR	CENGAL	Average of Province	Filling Data	Worst	1	2.603	949.929	0.0573	0.1121	0.6106	0.186	0.034	0.149152	0.291796	1.58939	0.484158	0.088502	54.4404	106.506	580.128	176.718	32.3032
SUMATERA SELATAN	KAB. OGAN KOMERING ILIR	PANGKALAN LAMPAM	Average of Province	Filling Data	Worst	1	2.114	771.678	0.0573	0.1121	0.6106	0.186	0.034	0.121132	0.236979	1.29081	0.393204	0.071876	44.2133	86.4975	471.145	143.519	26.2347
SUMATERA SELATAN	KAB. OGAN KOMERING ILIR	MESUJI MAKMUR	Average of Province	Filling Data	Worst	1	4.254	1552.74	0.0573	0.1121	0.6106	0.186	0.034	0.243754	0.476873	2.59749	0.791244	0.144636	88.9703	174.059	948.085	288.804	52.7921
SUMATERA SELATAN	KAB. OGAN KOMERING ILIR	MESUJI RAYA	Average of Province	Filling Data	Worst	1	2.87	1047.57	0.0573	0.1121	0.6106	0.186	0.034	0.164451	0.321727	1.75242	0.53382	0.09758	60.0246	117.43	639.634	194.844	35.6167
SUMATERA SELATAN	KAB. OGAN KOMERING ILIR	LEMPUING JAYA	Average of Province	Filling Data	Worst	1	4.724	1724.13	0.0573	0.1121	0.6106	0.186	0.034	0.270685	0.52956	2.88447	0.878664	0.160616	98.8001	193.29	1052.83	320.712	58.6248
SUMATERA SELATAN	KAB. OGAN KOMERING ILIR	TELUK GELAM	Average of Province	Filling Data	Worst	1	1.854	676.763	0.0573	0.1121	0.6106	0.186	0.034	0.106234	0.207833	1.13205	0.344844	0.063036	38.7755	75.8592	413.199	125.868	23.0081
SUMATERA SELATAN	KAB. OGAN KOMERING ILIR	PEDAMARAN TIMUR	Average of Province	Filling Data	Worst	1	1.677	611.978	0.0573	0.1121	0.6106	0.186	0.034	0.0960921	0.187992	1.02398	0.311922	0.057018	35.0736	68.617	373.751	113.852	20.8116
SUMATERA SELATAN	KAB. MUARA ENIM	TANJUNG AGUNG	SIPSN	2020	Bad	2	3.698	1349.6	0.204	0.0012	0.3163	0.1886	0.2899	0.754392	0.0044376	1.16968	0.697443	1.07205	275.353	1.61972	426.932	254.567	391.298
SUMATERA SELATAN	KAB. MUARA ENIM	MUARA ENIM	SIPSN	2020	Bad	2	9.697	3539.49	0.204	0.0012	0.3163	0.1886	0.2899	1.97819	0.0116364	3.06716	1.82885	2.81116	722.039	4.24729	1119.51	667.532	1026.07
SUMATERA SELATAN	KAB. MUARA ENIM	RAMBANG NIRU	SIPSN	2020	Bad	2	4.345	1585.8	0.204	0.0012	0.3163	0.1886	0.2899	0.88638	0.005214	1.37432	0.819467	1.25962	323.529	1.90311	501.628	299.105	459.76
SUMATERA SELATAN	KAB. MUARA ENIM	GUNUNG MEGANG	SIPSN	2020	Bad	2	4.478	1634.32	0.204	0.0012	0.3163	0.1886	0.2899	0.913512	0.0053736	1.41639	0.844551	1.29817	333.432	1.96136	516.983	308.261	473.833
SUMATERA SELATAN	KAB. MUARA ENIM	GELUMBANG	SIPSN	2020	Bad	2	7.872	2873.18	0.204	0.0012	0.3163	0.1886	0.2899	1.60589	0.0094464	2.48991	1.48466	2.28209	586.149	3.44794	908.818	541.901	832.964
SUMATERA SELATAN	KAB. MUARA ENIM	LAWANG KIDUL	SIPSN	2020	Bad	2	9.368	3419.39	0.204	0.0012	0.3163	0.1886	0.2899	1.91107	0.0112416	2.9631	1.7668	2.71578	697.541	4.10318	1081.53	644.884	991.261
SUMATERA SELATAN	KAB. MUARA ENIM	SEMENDE DARAT LAUT	SIPSN	2020	Bad	2	1.904	694.848	0.204	0.0012	0.3163	0.1886	0.2899	0.388416	0.0022848	0.602235	0.359094	0.55197	141.772	0.833952	219.816	131.069	201.469
SUMATERA SELATAN	KAB. MUARA ENIM	SEMENDE DARAT TENGAH	SIPSN	2020	Bad	2	1.422	518.948	0.204	0.0012	0.3163	0.1886	0.2899	0.290088	0.0017064	0.449779	0.268189	0.412238	105.882	0.622836	164.169	97.8891	150.467
SUMATERA SELATAN	KAB. MUARA ENIM	SEMENDE DARAT ULU	SIPSN	2020	Bad	2	2.214	807.975	0.204	0.0012	0.3163	0.1886	0.2899	0.451656	0.0026568	0.700288	0.41756	0.641839	164.854	0.969732	255.605	152.41	234.271
SUMATERA SELATAN	KAB. MUARA ENIM	UJAN MAS	SIPSN	2020	Bad	2	3.343	1220.16	0.204	0.0012	0.3163	0.1886	0.2899	0.681972	0.0040116	1.05739	0.63049	0.969136	248.92	1.46423	385.948	230.129	353.735
SUMATERA SELATAN	KAB. MUARA ENIM	LUBAI	SIPSN	2020	Bad	2	3.409	1244.36	0.204	0.0012	0.3163	0.1886	0.2899	0.695436	0.0040908	1.07827	0.642937	0.988269	253.834	1.49314	393.567	234.672	360.718
SUMATERA SELATAN	KAB. MUARA ENIM	RAMBANG	SIPSN	2020	Bad	2	3.577	1305.48	0.204	0.0012	0.3163	0.1886	0.2899	0.729708	0.0042924	1.13141	0.674622	1.03697	266.343	1.56673	412.963	246.237	378.495
SUMATERA SELATAN	KAB. MUARA ENIM	SUNGAI ROTAN	SIPSN	2020	Bad	2	4.121	1504.06	0.204	0.0012	0.3163	0.1886	0.2899	0.840684	0.0049452	1.30347	0.777221	1.19468	306.85	1.805	475.767	283.686	436.057
SUMATERA SELATAN	KAB. MUARA ENIM	LEMBAK	SIPSN	2020	Bad	2	2.482	905.799	0.204	0.0012	0.3163	0.1886	0.2899	0.506328	0.0029784	0.785057	0.468105	0.719532	184.81	1.08712	286.546	170.858	262.629
SUMATERA SELATAN	KAB. MUARA ENIM	BENAKAT	SIPSN	2020	Bad	2	1.299	473.999	0.204	0.0012	0.3163	0.1886	0.2899	0.264996	0.0015588	0.410874	0.244991	0.37658	96.7235	0.568962	149.969	89.4219	137.452
SUMATERA SELATAN	KAB. MUARA ENIM	KELEKAR	SIPSN	2020	Bad	2	1.453	530.174	0.204	0.0012	0.3163	0.1886	0.2899	0.296412	0.0017436	0.459584	0.274036	0.421225	108.19	0.636414	167.748	100.023	153.747
SUMATERA SELATAN	KAB. MUARA ENIM	MUARA BELIDA	SIPSN	2020	Bad	2	1.021	372.785	0.204	0.0012	0.3163	0.1886	0.2899	0.208284	0.0012252	0.322942	0.192561	0.295988	76.0237	0.447198	117.874	70.2846	108.036
SUMATERA SELATAN	KAB. MUARA ENIM	BELIMBING	SIPSN	2020	Bad	2	3.321	1212.1	0.204	0.0012	0.3163	0.1886	0.2899	0.677484	0.0039852	1.05043	0.626341	0.962758	247.282	1.4546	383.408	228.614	351.407
SUMATERA SELATAN	KAB. MUARA ENIM	BELIDA DARAT	SIPSN	2020	Bad	2	1.67	609.578	0.204	0.0012	0.3163	0.1886	0.2899	0.34068	0.002004	0.528221	0.314962	0.484133	124.348	0.73146	192.801	114.961	176.709
SUMATERA SELATAN	KAB. MUARA ENIM	LUBAI ULU	SIPSN	2020	Bad	2	4.238	1546.86	0.204	0.0012	0.3163	0.1886	0.2899	0.864552	0.0050856	1.34048	0.799287	1.2286	315.561	1.85624	489.275	291.74	448.438
SUMATERA SELATAN	KAB. MUARA ENIM	EMPAT PETULAI DANGKU	SIPSN	2020	Bad	2	2.583	942.775	0.204	0.0012	0.3163	0.1886	0.2899	0.526932	0.0030996	0.817003	0.487154	0.748812	192.33	1.13135	298.206	177.811	273.316
SUMATERA SELATAN	KAB. MUARA ENIM	PANANG ENIM	SIPSN	2020	Bad	2	1.675	611.457	0.204	0.0012	0.3163	0.1886	0.2899	0.3417	0.00201	0.529803	0.315905	0.485582	124.72	0.73365	193.378	115.305	177.238
SUMATERA SELATAN	KAB. LAHAT	TANJUNGSAKTI PUMU	SIPSN	2022	Good	4	1.432	522.628	0.2782	0.0003	0.3353	0.1904	0.1958	0.398382	0.0004296	0.48015	0.272653	0.280386	145.41	0.156804	175.255	99.5183	102.341
SUMATERA SELATAN	KAB. LAHAT	JARAI	SIPSN	2022	Good	4	2.047	746.99	0.2782	0.0003	0.3353	0.1904	0.1958	0.569475	0.0006141	0.686359	0.389749	0.400803	207.859	0.224146	250.521	142.258	146.293
SUMATERA SELATAN	KAB. LAHAT	KOTA AGUNG	SIPSN	2022	Good	4	1.397	509.857	0.2782	0.0003	0.3353	0.1904	0.1958	0.388645	0.0004191	0.468414	0.265989	0.273533	141.856	0.152972	170.971	97.0859	99.8394
SUMATERA SELATAN	KAB. LAHAT	PULAUPINANG	SIPSN	2022	Good	4	1.034	377.395	0.2782	0.0003	0.3353	0.1904	0.1958	0.287659	0.0003102	0.3467	0.196874	0.202457	104.995	0.113223	126.546	71.8589	73.8969
SUMATERA SELATAN	KAB. LAHAT	MERAPI BARAT	SIPSN	2022	Good	4	2.724	994.136	0.2782	0.0003	0.3353	0.1904	0.1958	0.757817	0.0008172	0.913357	0.51865	0.533359	276.603	0.298278	333.375	189.307	194.676
SUMATERA SELATAN	KAB. LAHAT	LAHAT	SIPSN	2022	Good	4	10.805	3943.96	0.2782	0.0003	0.3353	0.1904	0.1958	3.00595	0.0032415	3.62292	2.05727	2.11562	1097.17	1.18315	1322.36	750.904	772.201
SUMATERA SELATAN	KAB. LAHAT	PAJAR BULAN	SIPSN	2022	Good	4	1.29	471	0.2782	0.0003	0.3353	0.1904	0.1958	0.358878	0.000387	0.432537	0.245616	0.252582	130.99	0.141255	157.876	89.6498	92.1924
SUMATERA SELATAN	KAB. LAHAT	MULAK ULU	SIPSN	2022	Good	4	1.283	468.134	0.2782	0.0003	0.3353	0.1904	0.1958	0.356931	0.0003849	0.43019	0.244283	0.251211	130.28	0.140488	157.019	89.1634	91.6922
SUMATERA SELATAN	KAB. LAHAT	KIKIM SELATAN	SIPSN	2022	Good	4	1.759	641.883	0.2782	0.0003	0.3353	0.1904	0.1958	0.489354	0.0005277	0.589793	0.334914	0.344412	178.614	0.19261	215.274	122.243	125.71
SUMATERA SELATAN	KAB. LAHAT	KIKIM TIMUR	SIPSN	2022	Good	4	3.214	1172.93	0.2782	0.0003	0.3353	0.1904	0.1958	0.894135	0.0009642	1.07765	0.611946	0.629301	326.359	0.351933	393.344	223.36	229.695
SUMATERA SELATAN	KAB. LAHAT	KIKIM TENGAH	SIPSN	2022	Good	4	1.018	371.735	0.2782	0.0003	0.3353	0.1904	0.1958	0.283208	0.0003054	0.341335	0.193827	0.199324	103.371	0.111471	124.587	70.7469	72.7534
SUMATERA SELATAN	KAB. LAHAT	KIKIM BARAT	SIPSN	2022	Good	4	1.766	644.532	0.2782	0.0003	0.3353	0.1904	0.1958	0.491301	0.0005298	0.59214	0.336246	0.345783	179.325	0.193377	216.131	122.73	126.211
SUMATERA SELATAN	KAB. LAHAT	PSEKSU	SIPSN	2022	Good	4	0.927	338.429	0.2782	0.0003	0.3353	0.1904	0.1958	0.257891	0.0002781	0.310823	0.176501	0.181507	94.1304	0.101506	113.45	64.4228	66.2499
SUMATERA SELATAN	KAB. LAHAT	GUMAY TALANG	SIPSN	2022	Good	4	1.329	485.258	0.2782	0.0003	0.3353	0.1904	0.1958	0.369728	0.0003987	0.445614	0.253042	0.260218	134.951	0.145525	162.649	92.3602	94.9796
SUMATERA SELATAN	KAB. LAHAT	PAGAR GUNUNG	SIPSN	2022	Good	4	1.308	477.422	0.2782	0.0003	0.3353	0.1904	0.1958	0.363886	0.0003924	0.438572	0.249043	0.256106	132.818	0.143226	160.079	90.9008	93.4788
SUMATERA SELATAN	KAB. LAHAT	MERAPI TIMUR	SIPSN	2022	Good	4	2.479	904.884	0.2782	0.0003	0.3353	0.1904	0.1958	0.689658	0.0007437	0.831209	0.472002	0.485388	251.725	0.27145	303.391	172.281	177.167
SUMATERA SELATAN	KAB. LAHAT	TANJUNG SAKTI PUMI	SIPSN	2022	Good	4	1.654	603.825	0.2782	0.0003	0.3353	0.1904	0.1958	0.460143	0.0004962	0.554586	0.314922	0.323853	167.952	0.181113	202.424	114.946	118.206
SUMATERA SELATAN	KAB. LAHAT	GUMAY ULU	SIPSN	2022	Good	4	0.584	213.151	0.2782	0.0003	0.3353	0.1904	0.1958	0.162469	0.0001752	0.195815	0.111194	0.114347	59.3011	0.063948	71.4725	40.5857	41.7367
SUMATERA SELATAN	KAB. LAHAT	MERAPI SELATAN	SIPSN	2022	Good	4	0.868	316.806	0.2782	0.0003	0.3353	0.1904	0.1958	0.241478	0.0002604	0.29104	0.165267	0.169954	88.1393	0.095046	106.23	60.3225	62.0334
SUMATERA SELATAN	KAB. LAHAT	TANJUNGTEBAT	SIPSN	2022	Good	4	0.883	322.212	0.2782	0.0003	0.3353	0.1904	0.1958	0.245651	0.0002649	0.29607	0.168123	0.172891	89.6625	0.0966885	108.066	61.365	63.1054
SUMATERA SELATAN	KAB. LAHAT	MUARAPAYANG	SIPSN	2022	Good	4	0.857	312.706	0.2782	0.0003	0.3353	0.1904	0.1958	0.238417	0.0002571	0.287352	0.163173	0.167801	87.0224	0.0938415	104.884	59.5581	61.2472
SUMATERA SELATAN	KAB. LAHAT	SUKAMERINDU	SIPSN	2022	Good	4	0.781	284.987	0.2782	0.0003	0.3353	0.1904	0.1958	0.217274	0.0002343	0.261869	0.148702	0.15292	79.3051	0.0855195	95.5823	54.2764	55.8157
SUMATERA SELATAN	KAB. LAHAT	MULAK SEBINGKAI	SIPSN	2022	Good	4	0.579	211.228	0.2782	0.0003	0.3353	0.1904	0.1958	0.161078	0.0001737	0.194139	0.110242	0.113368	58.7934	0.0634005	70.8606	40.2382	41.3794
SUMATERA SELATAN	KAB. LAHAT	LAHAT SELATAN	SIPSN	2022	Good	4	1.37	500.17	0.2782	0.0003	0.3353	0.1904	0.1958	0.381134	0.000411	0.459361	0.260848	0.268246	139.114	0.150015	167.667	95.2095	97.9098
SUMATERA SELATAN	KAB. MUSI RAWAS	TUGUMULYO	SIPSN	2022	Good	4	6.675	2436.35	0.0406926	0	0.798707	0.1009	0.0597	0.271623	0	5.33137	0.673508	0.398497	99.1425	0	1945.95	245.83	145.452
SUMATERA SELATAN	KAB. MUSI RAWAS	MUARA LAKITAN	SIPSN	2022	Good	4	5.817	2123.29	0.0406926	0	0.798707	0.1009	0.0597	0.236709	0	4.64608	0.586935	0.347275	86.3988	0	1695.82	214.231	126.755
SUMATERA SELATAN	KAB. MUSI RAWAS	MUARA KELINGI	SIPSN	2022	Good	4	6.164	2249.86	0.0406926	0	0.798707	0.1009	0.0597	0.250829	0	4.92323	0.621948	0.367991	91.5528	0	1796.98	227.011	134.317
SUMATERA SELATAN	KAB. MUSI RAWAS	JAYALOKA	SIPSN	2022	Good	4	2.293	836.991	0.0406926	0	0.798707	0.1009	0.0597	0.0933082	0	1.83144	0.231364	0.136892	34.0575	0	668.474	84.4478	49.9656
SUMATERA SELATAN	KAB. MUSI RAWAS	MUARA BELITI	SIPSN	2022	Good	4	3.828	1397.07	0.0406926	0	0.798707	0.1009	0.0597	0.155771	0	3.05745	0.386245	0.228532	56.8566	0	1115.97	140.979	83.414
SUMATERA SELATAN	KAB. MUSI RAWAS	STL ULU TERAWAS	SIPSN	2022	Good	4	4.578	1670.93	0.0406926	0	0.798707	0.1009	0.0597	0.186291	0	3.65648	0.46192	0.273307	67.9962	0	1334.62	168.601	99.7569
SUMATERA SELATAN	KAB. MUSI RAWAS	SELANGIT	SIPSN	2022	Good	4	2.676	976.598	0.0406926	0	0.798707	0.1009	0.0597	0.108894	0	2.13734	0.270008	0.159757	39.7461	0	780.129	98.5531	58.3114
SUMATERA SELATAN	KAB. MUSI RAWAS	MEGANG SAKTI	SIPSN	2022	Good	4	7.888	2879.16	0.0406926	0	0.798707	0.1009	0.0597	0.320984	0	6.3002	0.795899	0.470914	117.159	0	2299.57	290.503	171.883
SUMATERA SELATAN	KAB. MUSI RAWAS	PURWODADI	SIPSN	2022	Good	4	2.237	816.548	0.0406926	0	0.798707	0.1009	0.0597	0.0910295	0	1.78671	0.225713	0.133549	33.2258	0	652.149	82.3854	48.7453
SUMATERA SELATAN	KAB. MUSI RAWAS	BTS. ULU	SIPSN	2022	Good	4	4.231	1544.47	0.0406926	0	0.798707	0.1009	0.0597	0.172171	0	3.37933	0.426908	0.252591	62.8423	0	1233.46	155.821	92.1956
SUMATERA SELATAN	KAB. MUSI RAWAS	TIANG PUMPUNG KEPUNGUT	SIPSN	2022	Good	4	1.755	640.402	0.0406926	0	0.798707	0.1009	0.0597	0.0714156	0	1.40173	0.17708	0.104773	26.0667	0	511.632	64.634	38.2423
SUMATERA SELATAN	KAB. MUSI RAWAS	SUMBER HARTA	SIPSN	2022	Good	4	2.629	959.754	0.0406926	0	0.798707	0.1009	0.0597	0.106981	0	2.0998	0.265266	0.156951	39.0481	0	766.428	96.8221	57.2872
SUMATERA SELATAN	KAB. MUSI RAWAS	TUAH NEGERI	SIPSN	2022	Good	4	3.813	1391.87	0.0406926	0	0.798707	0.1009	0.0597	0.155161	0	3.04547	0.384732	0.227636	56.6338	0	1111.6	140.427	83.0872
SUMATERA SELATAN	KAB. MUSI RAWAS	SUKA KARYA	SIPSN	2022	Good	4	2.112	770.762	0.0406926	0	0.798707	0.1009	0.0597	0.0859429	0	1.68687	0.213101	0.126086	31.3691	0	615.708	77.7818	46.0215
SUMATERA SELATAN	KAB. MUSI BANYUASIN	SEKAYU	SIPSN	2022	Good	4	7.826	2856.34	0.173	0.0216	0.5718	0.1531	0.0805	1.3539	0.169042	4.47491	1.19816	0.629993	494.173	61.7002	1633.34	437.329	229.947
SUMATERA SELATAN	KAB. MUSI BANYUASIN	LAIS	SIPSN	2022	Good	4	4.576	1670.06	0.173	0.0216	0.5718	0.1531	0.0805	0.791648	0.0988416	2.61656	0.700586	0.368368	288.952	36.0772	955.043	255.714	134.454
SUMATERA SELATAN	KAB. MUSI BANYUASIN	SUNGAI KERUH	SIPSN	2022	Good	4	2.076	757.691	0.173	0.0216	0.5718	0.1531	0.0805	0.359148	0.0448416	1.18706	0.317836	0.167118	131.089	16.3672	433.276	116.01	60.9981
SUMATERA SELATAN	KAB. MUSI BANYUASIN	BATANG HARI LEKO	SIPSN	2022	Good	4	1.897	692.582	0.173	0.0216	0.5718	0.1531	0.0805	0.328181	0.0409752	1.0847	0.290431	0.152708	119.786	14.9559	395.917	106.007	55.7386
SUMATERA SELATAN	KAB. MUSI BANYUASIN	SANGA DESA	SIPSN	2022	Good	4	2.895	1056.82	0.173	0.0216	0.5718	0.1531	0.0805	0.500835	0.062532	1.65536	0.443225	0.233048	182.805	22.8242	604.207	161.777	85.0623
SUMATERA SELATAN	KAB. MUSI BANYUASIN	BABAT TOMAN	SIPSN	2022	Good	4	3.198	1167.12	0.173	0.0216	0.5718	0.1531	0.0805	0.553254	0.0690768	1.82862	0.489614	0.257439	201.938	25.213	667.445	178.709	93.9652
SUMATERA SELATAN	KAB. MUSI BANYUASIN	SUNGAI LILIN	SIPSN	2022	Good	4	5.288	1930.18	0.173	0.0216	0.5718	0.1531	0.0805	0.914824	0.114221	3.02368	0.809593	0.425684	333.911	41.6906	1103.64	295.501	155.375
SUMATERA SELATAN	KAB. MUSI BANYUASIN	KELUANG	SIPSN	2022	Good	4	2.839	1036.35	0.173	0.0216	0.5718	0.1531	0.0805	0.491147	0.0613224	1.62334	0.434651	0.22854	179.269	22.3827	592.519	158.648	83.4169
SUMATERA SELATAN	KAB. MUSI BANYUASIN	BAYUNG LENCIR	SIPSN	2022	Good	4	7.109	2594.74	0.173	0.0216	0.5718	0.1531	0.0805	1.22986	0.153554	4.06493	1.08839	0.572275	448.898	56.0474	1483.7	397.262	208.88
SUMATERA SELATAN	KAB. MUSI BANYUASIN	PLAKAT TINGGI	SIPSN	2022	Good	4	2.328	849.829	0.173	0.0216	0.5718	0.1531	0.0805	0.402744	0.0502848	1.33115	0.356417	0.187404	147.002	18.354	485.87	130.092	68.4025
SUMATERA SELATAN	KAB. MUSI BANYUASIN	LALAN	SIPSN	2022	Good	4	3.492	1274.51	0.173	0.0216	0.5718	0.1531	0.0805	0.604116	0.0754272	1.99673	0.534625	0.281106	220.502	27.5309	728.805	195.138	102.604
SUMATERA SELATAN	KAB. MUSI BANYUASIN	TUNGKAL JAYA	SIPSN	2022	Good	4	4.46	1627.76	0.173	0.0216	0.5718	0.1531	0.0805	0.77158	0.096336	2.55023	0.682826	0.35903	281.627	35.1626	930.833	249.231	131.046
SUMATERA SELATAN	KAB. MUSI BANYUASIN	LAWANG WETAN	SIPSN	2022	Good	4	2.289	835.396	0.173	0.0216	0.5718	0.1531	0.0805	0.395997	0.0494424	1.30885	0.350446	0.184265	144.539	18.0465	477.73	127.913	67.2565
SUMATERA SELATAN	KAB. MUSI BANYUASIN	BABAT SUPAT	SIPSN	2022	Good	4	3.085	1125.87	0.173	0.0216	0.5718	0.1531	0.0805	0.533705	0.066636	1.764	0.472314	0.248342	194.802	24.3221	643.861	172.394	90.645
SUMATERA SELATAN	KAB. MUSI BANYUASIN	JIRAK JAYA	SIPSN	2022	Good	4	1.681	613.477	0.173	0.0216	0.5718	0.1531	0.0805	0.290813	0.0363096	0.961196	0.257361	0.135321	106.147	13.253	350.836	93.9368	49.392
SUMATERA SELATAN	KAB. BANYUASIN	BANYUASIN I	SIPSN	2022	Good	4	7.274	2655.05	0.124	0.0821	0.6693	0.0711	0.0535	0.901976	0.597195	4.86849	0.517181	0.389159	329.221	217.976	1777	188.771	142.043
SUMATERA SELATAN	KAB. BANYUASIN	BANYUASIN II	SIPSN	2022	Good	4	3.615	1319.41	0.124	0.0821	0.6693	0.0711	0.0535	0.44826	0.296792	2.41952	0.257026	0.193403	163.615	108.329	883.125	93.8147	70.5919
SUMATERA SELATAN	KAB. BANYUASIN	BANYUASIN III	SIPSN	2022	Good	4	8.815	3217.34	0.124	0.0821	0.6693	0.0711	0.0535	1.09306	0.723712	5.89988	0.626746	0.471602	398.967	264.155	2153.46	228.762	172.135
SUMATERA SELATAN	KAB. BANYUASIN	PULAU RIMAU	SIPSN	2022	Good	4	3.134	1144.03	0.124	0.0821	0.6693	0.0711	0.0535	0.388616	0.257301	2.09759	0.222827	0.167669	141.845	93.915	765.619	81.332	61.1992
SUMATERA SELATAN	KAB. BANYUASIN	BETUNG	SIPSN	2022	Good	4	7.133	2603.69	0.124	0.0821	0.6693	0.0711	0.0535	0.884492	0.585619	4.77412	0.507156	0.381615	322.84	213.751	1742.55	185.112	139.29
SUMATERA SELATAN	KAB. BANYUASIN	RAMBUTAN	SIPSN	2022	Good	4	5.558	2028.75	0.124	0.0821	0.6693	0.0711	0.0535	0.689192	0.456312	3.71997	0.395174	0.297353	251.555	166.554	1357.79	144.238	108.534
SUMATERA SELATAN	KAB. BANYUASIN	MUARA PADANG	SIPSN	2022	Good	4	4.063	1482.84	0.124	0.0821	0.6693	0.0711	0.0535	0.503812	0.333572	2.71937	0.288879	0.21737	183.891	121.754	992.569	105.441	79.3402
SUMATERA SELATAN	KAB. BANYUASIN	MUARA TELANG	SIPSN	2022	Good	4	5.135	1874.38	0.124	0.0821	0.6693	0.0711	0.0535	0.63674	0.421583	3.43686	0.365098	0.274722	232.41	153.878	1254.45	133.261	100.274
SUMATERA SELATAN	KAB. BANYUASIN	MAKARTI JAYA	SIPSN	2022	Good	4	2.913	1063.12	0.124	0.0821	0.6693	0.0711	0.0535	0.361212	0.239157	1.94967	0.207114	0.155845	131.842	87.2924	711.63	75.5967	56.8836
SUMATERA SELATAN	KAB. BANYUASIN	TALANG KELAPA	SIPSN	2022	Good	4	19.412	7085.54	0.124	0.0821	0.6693	0.0711	0.0535	2.40709	1.59373	12.9925	1.38019	1.03854	878.587	581.71	4742.24	503.771	379.068
SUMATERA SELATAN	KAB. BANYUASIN	RANTAU BAYUR	SIPSN	2022	Good	4	5.216	1903.93	0.124	0.0821	0.6693	0.0711	0.0535	0.646784	0.428234	3.49107	0.370858	0.279056	236.076	156.305	1274.24	135.363	101.855
SUMATERA SELATAN	KAB. BANYUASIN	TANJUNG LAGO	SIPSN	2022	Good	4	5.366	1958.5	0.124	0.0821	0.6693	0.0711	0.0535	0.665384	0.440549	3.59146	0.381523	0.287081	242.865	160.8	1310.88	139.256	104.785
SUMATERA SELATAN	KAB. BANYUASIN	MUARA SUGIHAN	SIPSN	2022	Good	4	4.871	1778.08	0.124	0.0821	0.6693	0.0711	0.0535	0.604004	0.399909	3.26016	0.346328	0.260599	220.461	145.967	1189.96	126.41	95.1185
SUMATERA SELATAN	KAB. BANYUASIN	AIR SALEK	SIPSN	2022	Good	4	4.456	1626.44	0.124	0.0821	0.6693	0.0711	0.0535	0.552544	0.365838	2.9824	0.316822	0.238396	201.679	133.531	1088.58	115.64	87.0145
SUMATERA SELATAN	KAB. BANYUASIN	TUNGKAL ILIR	SIPSN	2022	Good	4	3.474	1268	0.124	0.0821	0.6693	0.0711	0.0535	0.430776	0.285215	2.32515	0.247001	0.185859	157.233	104.104	848.679	90.1555	67.8385
SUMATERA SELATAN	KAB. BANYUASIN	SUAK TAPEH	SIPSN	2022	Good	4	2.491	909.125	0.124	0.0821	0.6693	0.0711	0.0535	0.308884	0.204511	1.66723	0.17711	0.133269	112.743	74.6466	608.538	64.6452	48.643
SUMATERA SELATAN	KAB. BANYUASIN	SEMBAWA	SIPSN	2022	Good	4	4.312	1573.76	0.124	0.0821	0.6693	0.0711	0.0535	0.534688	0.354015	2.88602	0.306583	0.230692	195.161	129.216	1053.4	111.903	84.2026
SUMATERA SELATAN	KAB. BANYUASIN	SUMBER MARGA TELANG	SIPSN	2022	Good	4	3.072	1121.13	0.124	0.0821	0.6693	0.0711	0.0535	0.380928	0.252211	2.05609	0.218419	0.164352	139.039	92.0571	750.473	79.723	59.9885
SUMATERA SELATAN	KAB. BANYUASIN	AIR KUMBANG	SIPSN	2022	Good	4	3.559	1298.92	0.124	0.0821	0.6693	0.0711	0.0535	0.441316	0.292194	2.38204	0.253045	0.190407	161.08	106.651	869.444	92.3614	69.4984
SUMATERA SELATAN	KAB. BANYUASIN	KARANG AGUNG ILIR	SIPSN	2022	Good	4	1.478	539.347	0.124	0.0821	0.6693	0.0711	0.0535	0.183272	0.121344	0.989225	0.105086	0.079073	66.8943	44.2905	361.067	38.3563	28.8616
SUMATERA SELATAN	KAB. BANYUASIN	SELAT PENUGUAN	SIPSN	2022	Good	4	2.916	1064.34	0.124	0.0821	0.6693	0.0711	0.0535	0.361584	0.239404	1.95168	0.207328	0.156006	131.978	87.3823	712.363	75.6746	56.9422
SUMATERA SELATAN	KAB. OGAN KOMERING ULU TIMUR	MARTAPURA	SIPSN	2022	Good	4	8.213	2997.87	0.25802	0.0133	0.34898	0.1033	0.2764	2.11912	0.109233	2.86617	0.848403	2.27007	773.478	39.87	1046.15	309.667	828.577
SUMATERA SELATAN	KAB. OGAN KOMERING ULU TIMUR	BUAY MADANG	SIPSN	2022	Good	4	5.378	1962.86	0.25802	0.0133	0.34898	0.1033	0.2764	1.38763	0.0715274	1.87681	0.555547	1.48648	506.486	26.1075	685.037	202.775	542.565
SUMATERA SELATAN	KAB. OGAN KOMERING ULU TIMUR	BELITANG	SIPSN	2022	Good	4	7.437	2714.6	0.25802	0.0133	0.34898	0.1033	0.2764	1.91889	0.0989121	2.59536	0.768242	2.05559	700.397	36.1029	947.308	280.408	750.289
SUMATERA SELATAN	KAB. OGAN KOMERING ULU TIMUR	CEMPAKA	SIPSN	2022	Good	4	3.73	1361.49	0.25802	0.0133	0.34898	0.1033	0.2764	0.962415	0.049609	1.3017	0.385309	1.03097	351.281	18.1073	475.119	140.638	376.305
SUMATERA SELATAN	KAB. OGAN KOMERING ULU TIMUR	BUAY PEMUKA PELIUNG	SIPSN	2022	Good	4	4.943	1804.02	0.25802	0.0133	0.34898	0.1033	0.2764	1.27539	0.0657419	1.72501	0.510612	1.36625	465.518	23.9958	629.628	186.373	498.679
SUMATERA SELATAN	KAB. OGAN KOMERING ULU TIMUR	MADANG SUKU II	SIPSN	2022	Good	4	4.466	1630.07	0.25802	0.0133	0.34898	0.1033	0.2764	1.15232	0.0593978	1.55854	0.461338	1.2344	420.596	21.6802	568.869	168.388	450.557
SUMATERA SELATAN	KAB. OGAN KOMERING ULU TIMUR	MADANG SUKU I	SIPSN	2022	Good	4	5.256	1918.42	0.25802	0.0133	0.34898	0.1033	0.2764	1.35615	0.0699048	1.83424	0.542945	1.45276	494.996	25.5153	669.497	198.175	530.257
SUMATERA SELATAN	KAB. OGAN KOMERING ULU TIMUR	SEMENDAWAI SUKU III	SIPSN	2022	Good	4	5.695	2078.71	0.25802	0.0133	0.34898	0.1033	0.2764	1.46942	0.0757435	1.98744	0.588294	1.5741	536.34	27.6464	725.416	214.727	574.546
SUMATERA SELATAN	KAB. OGAN KOMERING ULU TIMUR	BELITANG II	SIPSN	2022	Good	4	6.075	2217.52	0.25802	0.0133	0.34898	0.1033	0.2764	1.56747	0.0807975	2.12005	0.627548	1.67913	572.127	29.4911	773.819	229.055	612.882
SUMATERA SELATAN	KAB. OGAN KOMERING ULU TIMUR	BELITANG III	SIPSN	2022	Good	4	5.059	1846.71	0.25802	0.0133	0.34898	0.1033	0.2764	1.30532	0.0672847	1.76549	0.522595	1.39831	476.443	24.5589	644.404	190.747	510.382
SUMATERA SELATAN	KAB. OGAN KOMERING ULU TIMUR	BUNGA MAYANG	SIPSN	2022	Good	4	2.576	940.332	0.25802	0.0133	0.34898	0.1033	0.2764	0.66466	0.0342608	0.898972	0.266101	0.712006	242.601	12.5052	328.125	97.1268	259.882
SUMATERA SELATAN	KAB. OGAN KOMERING ULU TIMUR	BUAY MADANG TIMUR	SIPSN	2022	Good	4	8.126	2966.02	0.25802	0.0133	0.34898	0.1033	0.2764	2.09667	0.108076	2.83581	0.839416	2.24603	765.285	39.4477	1035.07	306.387	819.8
SUMATERA SELATAN	KAB. OGAN KOMERING ULU TIMUR	MADANG SUKU III	SIPSN	2022	Good	4	3.587	1309.34	0.25802	0.0133	0.34898	0.1033	0.2764	0.925518	0.0477071	1.25179	0.370537	0.991447	337.814	17.4131	456.904	135.246	361.878
SUMATERA SELATAN	KAB. OGAN KOMERING ULU TIMUR	SEMENDAWAI BARAT	SIPSN	2022	Good	4	2.98	1087.77	0.25802	0.0133	0.34898	0.1033	0.2764	0.7689	0.039634	1.03996	0.307834	0.823672	280.648	14.4664	379.586	112.359	300.64
SUMATERA SELATAN	KAB. OGAN KOMERING ULU TIMUR	SEMENDAWAI TIMUR	SIPSN	2022	Good	4	4.901	1788.96	0.25802	0.0133	0.34898	0.1033	0.2764	1.26456	0.0651833	1.71035	0.506273	1.35464	461.563	23.7919	624.278	184.79	494.442
SUMATERA SELATAN	KAB. OGAN KOMERING ULU TIMUR	JAYAPURA	SIPSN	2022	Good	4	2.254	822.636	0.25802	0.0133	0.34898	0.1033	0.2764	0.581577	0.0299782	0.786601	0.232838	0.623006	212.276	10.942	287.109	84.9859	227.397
SUMATERA SELATAN	KAB. OGAN KOMERING ULU TIMUR	BELITANG JAYA	SIPSN	2022	Good	4	2.933	1070.51	0.25802	0.0133	0.34898	0.1033	0.2764	0.756773	0.0390089	1.02356	0.302979	0.810681	276.222	14.2382	373.599	110.587	295.899
SUMATERA SELATAN	KAB. OGAN KOMERING ULU TIMUR	BELITANG MADANG RAYA	SIPSN	2022	Good	4	6.473	2362.75	0.25802	0.0133	0.34898	0.1033	0.2764	1.67016	0.0860909	2.25895	0.668661	1.78914	609.61	31.4232	824.516	244.061	653.035
SUMATERA SELATAN	KAB. OGAN KOMERING ULU TIMUR	BELITANG MULYA	SIPSN	2022	Good	4	3.024	1103.7	0.25802	0.0133	0.34898	0.1033	0.2764	0.780253	0.0402192	1.05532	0.312379	0.835834	284.792	14.68	385.19	114.018	305.079
SUMATERA SELATAN	KAB. OGAN KOMERING ULU TIMUR	BUAY PEMUKA BANGSA RAJA	SIPSN	2022	Good	4	1.752	639.389	0.25802	0.0133	0.34898	0.1033	0.2764	0.452051	0.0233016	0.611413	0.180982	0.484253	164.999	8.50508	223.166	66.0583	176.752
SUMATERA SELATAN	KAB. OGAN KOMERING ULU SELATAN	MUARA DUA	Average of Province	Filling Data	Worst	1	5.99	2186.38	0.0585	0.0127	0.8732	0.0375	0.0181	0.350415	0.076073	5.23047	0.224625	0.108419	127.901	27.7666	1909.12	81.9881	39.5729
SUMATERA SELATAN	KAB. OGAN KOMERING ULU SELATAN	PULAU BERINGIN	Average of Province	Filling Data	Worst	1	3.622	1322.18	0.0585	0.0127	0.8732	0.0375	0.0181	0.211887	0.0459994	3.16273	0.135825	0.0655582	77.3388	16.7898	1154.4	49.5761	23.9287
SUMATERA SELATAN	KAB. OGAN KOMERING ULU SELATAN	BANDING AGUNG	Average of Province	Filling Data	Worst	1	3.12	1138.94	0.0585	0.0127	0.8732	0.0375	0.0181	0.18252	0.039624	2.72438	0.117	0.056472	66.6198	14.4628	994.4	42.705	20.6123
SUMATERA SELATAN	KAB. OGAN KOMERING ULU SELATAN	MUARA DUA KISAM	Average of Province	Filling Data	Worst	1	2.384	869.999	0.0585	0.0127	0.8732	0.0375	0.0181	0.139464	0.0302768	2.08171	0.0894	0.0431504	50.9044	11.051	759.824	32.631	15.7499
SUMATERA SELATAN	KAB. OGAN KOMERING ULU SELATAN	SIMPANG	Average of Province	Filling Data	Worst	1	2.219	810.098	0.0585	0.0127	0.8732	0.0375	0.0181	0.129811	0.0281813	1.93763	0.0832125	0.0401639	47.3812	10.2862	707.235	30.3726	14.6598
SUMATERA SELATAN	KAB. OGAN KOMERING ULU SELATAN	BUAY SANDANG AJI	Average of Province	Filling Data	Worst	1	2.575	939.806	0.0585	0.0127	0.8732	0.0375	0.0181	0.150638	0.0327025	2.24849	0.0965625	0.0466075	54.9827	11.9364	820.699	35.2453	17.0117
SUMATERA SELATAN	KAB. OGAN KOMERING ULU SELATAN	BUAY RUNJUNG	Average of Province	Filling Data	Worst	1	1.532	559.221	0.0585	0.0127	0.8732	0.0375	0.0181	0.089622	0.0194564	1.33774	0.05745	0.0277292	32.712	7.10159	488.276	20.9692	10.1212
SUMATERA SELATAN	KAB. OGAN KOMERING ULU SELATAN	MEKAKAU ILIR	Average of Province	Filling Data	Worst	1	2.883	1052.39	0.0585	0.0127	0.8732	0.0375	0.0181	0.168655	0.0366141	2.51744	0.108113	0.0521823	61.5593	13.3641	918.864	39.4611	19.0465
SUMATERA SELATAN	KAB. OGAN KOMERING ULU SELATAN	BUAY PEMACA	Average of Province	Filling Data	Worst	1	5.302	1935.33	0.0585	0.0127	0.8732	0.0375	0.0181	0.310167	0.0673354	4.62971	0.198825	0.0959662	113.211	24.5774	1689.84	72.5711	35.0277
SUMATERA SELATAN	KAB. OGAN KOMERING ULU SELATAN	KISAM TINGGI	Average of Province	Filling Data	Worst	1	2.305	841.222	0.0585	0.0127	0.8732	0.0375	0.0181	0.134843	0.0292735	2.01273	0.0864375	0.0417205	49.2175	10.6848	734.645	31.5497	15.228
SUMATERA SELATAN	KAB. OGAN KOMERING ULU SELATAN	KISAM ILIR	Average of Province	Filling Data	Worst	1	0.973	355.181	0.0585	0.0127	0.8732	0.0375	0.0181	0.0569205	0.0123571	0.849624	0.0364875	0.0176113	20.776	4.51034	310.113	13.3179	6.42812
SUMATERA SELATAN	KAB. OGAN KOMERING ULU SELATAN	BUAY PEMATANG RIBU RANAU TENGAH	Average of Province	Filling Data	Worst	1	3.134	1143.76	0.0585	0.0127	0.8732	0.0375	0.0181	0.183339	0.0398018	2.73661	0.117525	0.0567254	66.9187	14.5277	998.862	42.8966	20.7048
SUMATERA SELATAN	KAB. OGAN KOMERING ULU SELATAN	WARKUK RANAU SELATAN	Average of Province	Filling Data	Worst	1	2.943	1074.34	0.0585	0.0127	0.8732	0.0375	0.0181	0.172165	0.0373761	2.56983	0.110363	0.0532683	62.8404	13.6423	937.987	40.2823	19.4429
SUMATERA SELATAN	KAB. OGAN KOMERING ULU SELATAN	RUNJUNG AGUNG	Average of Province	Filling Data	Worst	1	1.606	586.119	0.0585	0.0127	0.8732	0.0375	0.0181	0.093951	0.0203962	1.40236	0.060225	0.0290686	34.2921	7.44461	511.861	21.9821	10.61
SUMATERA SELATAN	KAB. OGAN KOMERING ULU SELATAN	SUNGAI ARE	Average of Province	Filling Data	Worst	1	1.394	508.883	0.0585	0.0127	0.8732	0.0375	0.0181	0.081549	0.0177038	1.21724	0.052275	0.0252314	29.7654	6.46189	444.293	19.0804	9.20946
SUMATERA SELATAN	KAB. OGAN KOMERING ULU SELATAN	SINDANG DANAU	Average of Province	Filling Data	Worst	1	1.361	496.801	0.0585	0.0127	0.8732	0.0375	0.0181	0.0796185	0.0172847	1.18843	0.0510375	0.0246341	29.0608	6.30892	433.775	18.6287	8.99145
SUMATERA SELATAN	KAB. OGAN KOMERING ULU SELATAN	BUANA PEMACA	Average of Province	Filling Data	Worst	1	1.971	719.242	0.0585	0.0127	0.8732	0.0375	0.0181	0.115304	0.0250317	1.72108	0.0739125	0.0356751	42.0858	9.13657	628.193	26.9781	13.0214
SUMATERA SELATAN	KAB. OGAN KOMERING ULU SELATAN	TIGA DIHAJI	Average of Province	Filling Data	Worst	1	1.267	462.388	0.0585	0.0127	0.8732	0.0375	0.0181	0.0741195	0.0160909	1.10634	0.0475125	0.0229327	27.0536	5.87318	403.816	17.3421	8.37044
SUMATERA SELATAN	KAB. OGAN KOMERING ULU SELATAN	BUAY RAWAN	Average of Province	Filling Data	Worst	1	2.318	846.004	0.0585	0.0127	0.8732	0.0375	0.0181	0.135603	0.0294386	2.02408	0.086925	0.0419558	49.4951	10.7451	738.788	31.7276	15.3139
SUMATERA SELATAN	KAB. OGAN ILIR	MUARA KUANG	SIPSN	2020	Bad	2	2.753	1004.68	0.2477	0.0103	0.4142	0.1944	0.1334	0.681918	0.0283559	1.14029	0.535183	0.36725	248.9	10.3499	416.207	195.342	134.046
SUMATERA SELATAN	KAB. OGAN ILIR	TANJUNG BATU	SIPSN	2020	Bad	2	6.533	2384.67	0.2477	0.0103	0.4142	0.1944	0.1334	1.61822	0.0672899	2.70597	1.27002	0.871502	590.652	24.5608	987.679	463.556	318.098
SUMATERA SELATAN	KAB. OGAN ILIR	TANJUNG RAJA	SIPSN	2020	Bad	2	6.123	2234.72	0.2477	0.0103	0.4142	0.1944	0.1334	1.51667	0.0630669	2.53615	1.19031	0.816808	553.583	23.0194	925.694	434.464	298.135
SUMATERA SELATAN	KAB. OGAN ILIR	INDRALAYA	SIPSN	2020	Bad	2	5.745	2096.91	0.2477	0.0103	0.4142	0.1944	0.1334	1.42304	0.0591735	2.37958	1.11683	0.766383	519.408	21.5983	868.546	407.642	279.73
SUMATERA SELATAN	KAB. OGAN ILIR	PEMULUTAN	SIPSN	2020	Bad	2	6.418	2342.72	0.2477	0.0103	0.4142	0.1944	0.1334	1.58974	0.0661054	2.65834	1.24766	0.856161	580.255	24.1285	970.292	455.396	312.499
SUMATERA SELATAN	KAB. OGAN ILIR	RANTAU ALAI	SIPSN	2020	Bad	2	1.55	565.853	0.2477	0.0103	0.4142	0.1944	0.1334	0.383935	0.015965	0.64201	0.30132	0.20677	140.136	5.82723	234.334	109.982	75.471
SUMATERA SELATAN	KAB. OGAN ILIR	INDRALAYA UTARA	SIPSN	2020	Bad	2	5.336	1947.71	0.2477	0.0103	0.4142	0.1944	0.1334	1.32173	0.0549608	2.21017	1.03732	0.711822	482.43	20.0607	806.712	378.621	259.815
SUMATERA SELATAN	KAB. OGAN ILIR	INDRALAYA SELATAN	SIPSN	2020	Bad	2	3.084	1125.55	0.2477	0.0103	0.4142	0.1944	0.1334	0.763907	0.0317652	1.27739	0.59953	0.411406	278.826	11.5943	466.248	218.828	150.163
SUMATERA SELATAN	KAB. OGAN ILIR	PEMULUTAN SELATAN	SIPSN	2020	Bad	2	2.375	866.869	0.2477	0.0103	0.4142	0.1944	0.1334	0.588287	0.0244625	0.983725	0.4617	0.316825	214.725	8.92881	359.06	168.521	115.641
SUMATERA SELATAN	KAB. OGAN ILIR	PEMULUTAN BARAT	SIPSN	2020	Bad	2	1.918	699.972	0.2477	0.0103	0.4142	0.1944	0.1334	0.475089	0.0197554	0.794436	0.372859	0.255861	173.407	7.21072	289.969	136.094	93.3893
SUMATERA SELATAN	KAB. OGAN ILIR	RANTAU PANJANG	SIPSN	2020	Bad	2	2.396	874.706	0.2477	0.0103	0.4142	0.1944	0.1334	0.593489	0.0246788	0.992423	0.465782	0.319626	216.624	9.00776	362.234	170.011	116.664
SUMATERA SELATAN	KAB. OGAN ILIR	SUNGAI PINANG	SIPSN	2020	Bad	2	3.641	1328.97	0.2477	0.0103	0.4142	0.1944	0.1334	0.901876	0.0375023	1.5081	0.70781	0.485709	329.185	13.6883	550.457	258.351	177.284
SUMATERA SELATAN	KAB. OGAN ILIR	KANDIS	SIPSN	2020	Bad	2	1.493	544.905	0.2477	0.0103	0.4142	0.1944	0.1334	0.369816	0.0153779	0.618401	0.290239	0.199166	134.983	5.61293	225.716	105.937	72.6957
SUMATERA SELATAN	KAB. OGAN ILIR	RAMBANG KUANG	SIPSN	2020	Bad	2	2.818	1028.64	0.2477	0.0103	0.4142	0.1944	0.1334	0.698019	0.0290254	1.16722	0.547819	0.375921	254.777	10.5943	426.034	199.954	137.211
SUMATERA SELATAN	KAB. OGAN ILIR	LUBUK KELIAT	SIPSN	2020	Bad	2	2.472	902.161	0.2477	0.0103	0.4142	0.1944	0.1334	0.612314	0.0254616	1.0239	0.480557	0.329765	223.495	9.29348	373.724	175.403	120.364
SUMATERA SELATAN	KAB. OGAN ILIR	PAYARAMAN	SIPSN	2020	Bad	2	3.624	1322.61	0.2477	0.0103	0.4142	0.1944	0.1334	0.897665	0.0373272	1.50106	0.704506	0.483442	327.648	13.6244	547.887	257.145	176.456
SUMATERA SELATAN	KAB. EMPAT LAWANG	MUARA PINANG	SIPSN	2020	Bad	2	4.327	1579.21	0.1157	0.0048	0.232	0.5244	0.1231	0.500634	0.0207696	1.00386	2.26908	0.532654	182.731	7.5809	366.41	828.214	194.419
SUMATERA SELATAN	KAB. EMPAT LAWANG	PENDOPO	SIPSN	2020	Bad	2	5.492	2004.55	0.1157	0.0048	0.232	0.5244	0.1231	0.635424	0.0263616	1.27414	2.88	0.676065	231.93	9.62198	465.063	1051.2	246.764
SUMATERA SELATAN	KAB. EMPAT LAWANG	ULU MUSI	SIPSN	2020	Bad	2	2.576	940.386	0.1157	0.0048	0.232	0.5244	0.1231	0.298043	0.0123648	0.597632	1.35085	0.317106	108.786	4.51315	218.136	493.062	115.744
SUMATERA SELATAN	KAB. EMPAT LAWANG	TEBING TINGGI	SIPSN	2020	Bad	2	7.06	2576.92	0.1157	0.0048	0.232	0.5244	0.1231	0.816842	0.033888	1.63792	3.70226	0.869086	298.147	12.3691	597.841	1351.33	317.216
SUMATERA SELATAN	KAB. EMPAT LAWANG	LINTANG KANAN	SIPSN	2020	Bad	2	3.563	1300.67	0.1157	0.0048	0.232	0.5244	0.1231	0.412239	0.0171024	0.826616	1.86844	0.438605	150.467	6.24238	301.715	681.98	160.091
SUMATERA SELATAN	KAB. EMPAT LAWANG	TALANG PADANG	SIPSN	2020	Bad	2	1.862	679.589	0.1157	0.0048	0.232	0.5244	0.1231	0.215433	0.0089376	0.431984	0.976433	0.229212	78.6332	3.26222	157.674	356.398	83.6625
SUMATERA SELATAN	KAB. EMPAT LAWANG	PASEMAH AIR KERUH	SIPSN	2020	Bad	2	3.008	1098.01	0.1157	0.0048	0.232	0.5244	0.1231	0.348026	0.0144384	0.697856	1.5774	0.370285	127.029	5.27002	254.717	575.749	135.154
SUMATERA SELATAN	KAB. EMPAT LAWANG	SIKAP DALAM	SIPSN	2020	Bad	2	2.252	822.129	0.1157	0.0048	0.232	0.5244	0.1231	0.260556	0.0108096	0.522464	1.18095	0.277221	95.1031	3.9455	190.699	431.046	101.186
SUMATERA SELATAN	KAB. EMPAT LAWANG	SALING	SIPSN	2020	Bad	2	1.856	677.307	0.1157	0.0048	0.232	0.5244	0.1231	0.214739	0.0089088	0.430592	0.973286	0.228474	78.3798	3.25171	157.166	355.25	83.3929
SUMATERA SELATAN	KAB. EMPAT LAWANG	PENDOPO BARAT	SIPSN	2020	Bad	2	1.824	665.901	0.1157	0.0048	0.232	0.5244	0.1231	0.211037	0.0087552	0.423168	0.956506	0.224534	77.0284	3.19565	154.456	349.125	81.9551
SUMATERA SELATAN	KAB. PENUKAL ABAB LEMATANG ILIR	TALANG UBI	SIPSN	2022	Good	4	10.447	3813.02	0.247494	0.0203	0.422606	0.0776	0.232	2.58556	0.212074	4.41497	0.810687	2.4237	943.731	77.407	1611.46	295.901	884.652
SUMATERA SELATAN	KAB. PENUKAL ABAB LEMATANG ILIR	PENUKAL UTARA	SIPSN	2022	Good	4	2.82	1029.12	0.247494	0.0203	0.422606	0.0776	0.232	0.697932	0.057246	1.19175	0.218832	0.65424	254.745	20.8948	434.989	79.8737	238.798
SUMATERA SELATAN	KAB. PENUKAL ABAB LEMATANG ILIR	PENUKAL	SIPSN	2022	Good	4	3.621	1321.84	0.247494	0.0203	0.422606	0.0776	0.232	0.896174	0.0735063	1.53026	0.28099	0.840072	327.104	26.8298	558.544	102.561	306.626
SUMATERA SELATAN	KAB. PENUKAL ABAB LEMATANG ILIR	ABAB	SIPSN	2022	Good	4	3.259	1189.36	0.247494	0.0203	0.422606	0.0776	0.232	0.806581	0.0661577	1.37727	0.252898	0.756088	294.402	24.1476	502.705	92.3079	275.972
SUMATERA SELATAN	KAB. PENUKAL ABAB LEMATANG ILIR	TANAH ABANG	SIPSN	2022	Good	4	3.772	1376.66	0.247494	0.0203	0.422606	0.0776	0.232	0.933546	0.0765716	1.59407	0.292707	0.875104	340.744	27.9486	581.836	106.838	319.413
SUMATERA SELATAN	KAB. MUSI RAWAS UTARA	RUPIT	Average of Province	Filling Data	Worst	1	4.41	1609.73	0.0927	0.017	0.3585	0.4526	0.0792	0.408807	0.07497	1.58099	1.99597	0.349272	149.215	27.3641	577.06	728.528	127.484
SUMATERA SELATAN	KAB. MUSI RAWAS UTARA	RAWAS ULU	Average of Province	Filling Data	Worst	1	4.063	1483.02	0.0927	0.017	0.3585	0.4526	0.0792	0.37664	0.069071	1.45659	1.83891	0.32179	137.474	25.2109	531.654	671.204	117.453
SUMATERA SELATAN	KAB. MUSI RAWAS UTARA	NIBUNG	Average of Province	Filling Data	Worst	1	3.259	1189.49	0.0927	0.017	0.3585	0.4526	0.0792	0.302109	0.055403	1.16835	1.47502	0.258113	110.27	20.2221	426.448	538.384	94.2112
SUMATERA SELATAN	KAB. MUSI RAWAS UTARA	RAWAS ILIR	Average of Province	Filling Data	Worst	1	3.369	1229.79	0.0927	0.017	0.3585	0.4526	0.0792	0.312306	0.057273	1.20779	1.52481	0.266825	113.992	20.9046	440.842	556.555	97.3911
SUMATERA SELATAN	KAB. MUSI RAWAS UTARA	KARANG DAPO	Average of Province	Filling Data	Worst	1	2.528	922.856	0.0927	0.017	0.3585	0.4526	0.0792	0.234346	0.042976	0.906288	1.14417	0.200218	85.5361	15.6862	330.795	417.623	73.0794
SUMATERA SELATAN	KAB. MUSI RAWAS UTARA	KARANG JAYA	Average of Province	Filling Data	Worst	1	3.776	1378.07	0.0927	0.017	0.3585	0.4526	0.0792	0.350035	0.064192	1.3537	1.70902	0.299059	127.763	23.4301	494.099	623.791	109.157
SUMATERA SELATAN	KAB. MUSI RAWAS UTARA	ULU RAWAS	Average of Province	Filling Data	Worst	1	1.46	532.878	0.0927	0.017	0.3585	0.4526	0.0792	0.135342	0.02482	0.52341	0.660796	0.115632	49.3998	9.0593	191.045	241.191	42.2057
SUMATERA SELATAN	KOTA PALEMBANG	ILIR BARAT DUA	SIPSN	2022	Good	4	9.272	3384.43	0.776	0.0049	0.1461	0.061	0.012	7.19507	0.0454328	1.35464	0.565592	0.111264	2626.2	16.583	494.443	206.441	40.6114
SUMATERA SELATAN	KOTA PALEMBANG	SEBERANG ULU SATU	SIPSN	2022	Good	4	12.47	4551.56	0.776	0.0049	0.1461	0.061	0.012	9.67672	0.061103	1.82187	0.76067	0.14964	3532	22.3026	664.981	277.645	54.6186
SUMATERA SELATAN	KOTA PALEMBANG	SEBERANG ULU DUA	SIPSN	2022	Good	4	14.027	5119.74	0.776	0.0049	0.1461	0.061	0.012	10.885	0.0687323	2.04934	0.855647	0.168324	3973.01	25.0873	748.011	312.311	61.4383
SUMATERA SELATAN	KOTA PALEMBANG	ILIR BARAT SATU	SIPSN	2022	Good	4	20.022	7307.93	0.776	0.0049	0.1461	0.061	0.012	15.5371	0.0981078	2.92521	1.22134	0.240264	5671.03	35.8093	1067.7	445.79	87.6964
SUMATERA SELATAN	KOTA PALEMBANG	ILIR TIMUR SATU	SIPSN	2022	Good	4	8.937	3261.97	0.776	0.0049	0.1461	0.061	0.012	6.93511	0.0437913	1.3057	0.545157	0.107244	2531.32	15.9838	476.579	198.982	39.1441
SUMATERA SELATAN	KOTA PALEMBANG	ILIR TIMUR DUA	SIPSN	2022	Good	4	11.431	4172.41	0.776	0.0049	0.1461	0.061	0.012	8.87046	0.0560119	1.67007	0.697291	0.137172	3237.72	20.4443	609.575	254.511	50.0678
SUMATERA SELATAN	KOTA PALEMBANG	SUKARAMI	SIPSN	2022	Good	4	26.614	9714.26	0.776	0.0049	0.1461	0.061	0.012	20.6525	0.130409	3.88831	1.62345	0.319368	7538.15	47.5991	1419.23	592.561	116.569
SUMATERA SELATAN	KOTA PALEMBANG	SAKO	SIPSN	2022	Good	4	15.207	5550.69	0.776	0.0049	0.1461	0.061	0.012	11.8006	0.0745143	2.22174	0.927627	0.182484	4307.23	27.1977	810.936	338.584	66.6067
SUMATERA SELATAN	KOTA PALEMBANG	KEMUNING	SIPSN	2022	Good	4	10.99	4011.32	0.776	0.0049	0.1461	0.061	0.012	8.52824	0.053851	1.60564	0.67039	0.13188	3112.81	19.6556	586.058	244.692	48.1362
SUMATERA SELATAN	KOTA PALEMBANG	KALIDONI	SIPSN	2022	Good	4	17.133	6253.4	0.776	0.0049	0.1461	0.061	0.012	13.2952	0.0839517	2.50313	1.04511	0.205596	4852.75	30.6424	913.643	381.466	75.0425
SUMATERA SELATAN	KOTA PALEMBANG	BUKITKECIL	SIPSN	2022	Good	4	5.15	1879.75	0.776	0.0049	0.1461	0.061	0.012	3.9964	0.025235	0.752415	0.31415	0.0618	1458.69	9.21077	274.631	114.665	22.557
SUMATERA SELATAN	KOTA PALEMBANG	GANDUS	SIPSN	2022	Good	4	10.484	3826.55	0.776	0.0049	0.1461	0.061	0.012	8.13558	0.0513716	1.53171	0.639524	0.125808	2969.49	18.7506	559.075	233.426	45.9199
SUMATERA SELATAN	KOTA PALEMBANG	KERTAPATI	SIPSN	2022	Good	4	12.96	4730.44	0.776	0.0049	0.1461	0.061	0.012	10.057	0.063504	1.89346	0.79056	0.15552	3670.79	23.179	691.111	288.554	56.7648
SUMATERA SELATAN	KOTA PALEMBANG	PLAJU	SIPSN	2022	Good	4	13.024	4753.86	0.776	0.0049	0.1461	0.061	0.012	10.1066	0.0638176	1.90281	0.794464	0.156288	3688.92	23.2934	694.524	289.979	57.0451
SUMATERA SELATAN	KOTA PALEMBANG	ALANG-ALANG LEBAR	SIPSN	2022	Good	4	14.827	5411.76	0.776	0.0049	0.1461	0.061	0.012	11.5058	0.0726523	2.16622	0.904447	0.177924	4199.6	26.5181	790.672	330.123	64.9423
SUMATERA SELATAN	KOTA PALEMBANG	SEMATANGBORANG	SIPSN	2022	Good	4	8.486	3097.27	0.776	0.0049	0.1461	0.061	0.012	6.58514	0.0415814	1.2398	0.517646	0.101832	2403.57	15.1772	452.529	188.941	37.1687
SUMATERA SELATAN	KOTA PALEMBANG	JAKABARING	SIPSN	2022	Good	4	12.553	4581.74	0.776	0.0049	0.1461	0.061	0.012	9.74113	0.0615097	1.83399	0.765733	0.150636	3555.51	22.451	669.408	279.493	54.9821
SUMATERA SELATAN	KOTA PALEMBANG	ILIR TIMUR TIGA	SIPSN	2022	Good	4	9.999	3649.71	0.776	0.0049	0.1461	0.061	0.012	7.75922	0.0489951	1.46085	0.609939	0.119988	2832.12	17.8832	533.212	222.628	43.7956
SUMATERA SELATAN	KOTA PAGAR ALAM	PAGAR ALAM UTARA	Average of Province	Filling Data	Worst	1	5.301	1934.86	0.5956	0.0066	0.3058	0.0171	0.0749	3.15728	0.0349866	1.62105	0.0906471	0.397045	1152.41	12.7701	591.682	33.0862	144.921
SUMATERA SELATAN	KOTA PAGAR ALAM	PAGAR ALAM SELATAN	Average of Province	Filling Data	Worst	1	5.927	2163.36	0.5956	0.0066	0.3058	0.0171	0.0749	3.53012	0.0391182	1.81248	0.101352	0.443932	1288.49	14.2781	661.554	36.9934	162.035
SUMATERA SELATAN	KOTA PAGAR ALAM	DEMPO UTARA	Average of Province	Filling Data	Worst	1	2.723	994.028	0.5956	0.0066	0.3058	0.0171	0.0749	1.62182	0.0179718	0.832693	0.0465633	0.203953	591.964	6.55971	303.933	16.9956	74.4427
SUMATERA SELATAN	KOTA PAGAR ALAM	DEMPO SELATAN	Average of Province	Filling Data	Worst	1	1.578	576.086	0.5956	0.0066	0.3058	0.0171	0.0749	0.939857	0.0104148	0.482552	0.0269838	0.118192	343.048	3.8014	176.132	9.84909	43.1402
SUMATERA SELATAN	KOTA PAGAR ALAM	DEMPO TENGAH	Average of Province	Filling Data	Worst	1	1.813	661.817	0.5956	0.0066	0.3058	0.0171	0.0749	1.07982	0.0119658	0.554415	0.0310023	0.135794	394.135	4.36752	202.362	11.3158	49.5647
SUMATERA SELATAN	KOTA LUBUK LINGGAU	LUBUK LINGGAU TIMUR I	Average of Province	Filling Data	Worst	1	4.023	1468.5	0.5673	0.0046	0.1607	0.1483	0.1191	2.28225	0.0185058	0.646496	0.596611	0.479139	833.02	6.75462	235.971	217.763	174.886
SUMATERA SELATAN	KOTA LUBUK LINGGAU	LUBUK LINGGAU BARAT I	Average of Province	Filling Data	Worst	1	4.563	1665.45	0.5673	0.0046	0.1607	0.1483	0.1191	2.58859	0.0209898	0.733274	0.676693	0.543453	944.835	7.66128	267.645	246.993	198.36
SUMATERA SELATAN	KOTA LUBUK LINGGAU	LUBUK LINGGAU SELATAN I	Average of Province	Filling Data	Worst	1	1.945	709.764	0.5673	0.0046	0.1607	0.1483	0.1191	1.1034	0.008947	0.312562	0.288443	0.23165	402.74	3.26566	114.085	105.282	84.5521
SUMATERA SELATAN	KOTA LUBUK LINGGAU	LUBUK LINGGAU UTARA I	Average of Province	Filling Data	Worst	1	2.129	776.966	0.5673	0.0046	0.1607	0.1483	0.1191	1.20778	0.0097934	0.34213	0.315731	0.253564	440.84	3.57459	124.878	115.242	92.5508
SUMATERA SELATAN	KOTA LUBUK LINGGAU	LUBUK LINGGAU TIMUR II	Average of Province	Filling Data	Worst	1	3.815	1392.33	0.5673	0.0046	0.1607	0.1483	0.1191	2.16425	0.017549	0.613071	0.565764	0.454367	789.951	6.40538	223.771	206.504	165.844
SUMATERA SELATAN	KOTA LUBUK LINGGAU	LUBUK LINGGAU BARAT II	Average of Province	Filling Data	Worst	1	2.451	894.506	0.5673	0.0046	0.1607	0.1483	0.1191	1.39045	0.0112746	0.393876	0.363483	0.291914	507.515	4.11523	143.765	132.671	106.549
SUMATERA SELATAN	KOTA LUBUK LINGGAU	LUBUK LINGGAU SELATAN II	Average of Province	Filling Data	Worst	1	3.937	1436.99	0.5673	0.0046	0.1607	0.1483	0.1191	2.23346	0.0181102	0.632676	0.583857	0.468897	815.213	6.61022	230.927	213.108	171.147
SUMATERA SELATAN	KOTA LUBUK LINGGAU	LUBUK LINGGAU UTARA II	Average of Province	Filling Data	Worst	1	4.928	1798.83	0.5673	0.0046	0.1607	0.1483	0.1191	2.79565	0.0226688	0.79193	0.730822	0.586925	1020.41	8.27411	289.054	266.75	214.228
SUMATERA SELATAN	KOTA PRABUMULIH	PRABUMULIH BARAT	SIPSN	2022	Good	4	2.941	1073.41	0.6585	0.0104	0.1714	0.1294	0.0303	1.93665	0.0305864	0.504087	0.380565	0.0891123	706.877	11.164	183.992	138.906	32.526
SUMATERA SELATAN	KOTA PRABUMULIH	PRABUMULIH TIMUR	SIPSN	2022	Good	4	7.74	2825.07	0.6585	0.0104	0.1714	0.1294	0.0303	5.09679	0.080496	1.32664	1.00156	0.234522	1860.33	29.381	484.222	365.568	85.6005
SUMATERA SELATAN	KOTA PRABUMULIH	CAMBAI	SIPSN	2022	Good	4	1.892	690.517	0.6585	0.0104	0.1714	0.1294	0.0303	1.24588	0.0196768	0.324289	0.244825	0.0573276	454.747	7.18203	118.365	89.3611	20.9246
SUMATERA SELATAN	KOTA PRABUMULIH	RAMBANG KAPAK TENGAH	SIPSN	2022	Good	4	1.286	469.438	0.6585	0.0104	0.1714	0.1294	0.0303	0.846831	0.0133744	0.22042	0.166408	0.0389658	309.093	4.88166	80.4534	60.7391	14.2225
SUMATERA SELATAN	KOTA PRABUMULIH	PRABUMULIH UTARA	SIPSN	2022	Good	4	3.035	1107.7	0.6585	0.0104	0.1714	0.1294	0.0303	1.99855	0.031564	0.520199	0.392729	0.0919605	729.47	11.5209	189.873	143.346	33.5656
SUMATERA SELATAN	KOTA PRABUMULIH	PRABUMULIH SELATAN	SIPSN	2022	Good	4	2.086	761.238	0.6585	0.0104	0.1714	0.1294	0.0303	1.37363	0.0216944	0.35754	0.269928	0.0632058	501.375	7.91846	130.502	98.5239	23.0701
BENGKULU	KAB. BENGKULU SELATAN	KEDURANG	SIPSN	2019	Bad	2	0.906	330.551	0.1784	0.0051	0.6451	0.0782	0.0932	0.16163	0.0046206	0.584461	0.0708492	0.0844392	58.9951	1.68652	213.328	25.86	30.8203
BENGKULU	KAB. BENGKULU SELATAN	SEGINIM	SIPSN	2019	Bad	2	1.284	468.68	0.1784	0.0051	0.6451	0.0782	0.0932	0.229066	0.0065484	0.828308	0.100409	0.119669	83.6089	2.39017	302.333	36.6492	43.6791
BENGKULU	KAB. BENGKULU SELATAN	PINO	SIPSN	2019	Bad	2	0.949	346.564	0.1784	0.0051	0.6451	0.0782	0.0932	0.169302	0.0048399	0.6122	0.0742118	0.0884468	61.7951	1.76656	223.453	27.0873	32.2831
BENGKULU	KAB. BENGKULU SELATAN	MANNA	SIPSN	2019	Bad	2	1.244	454.144	0.1784	0.0051	0.6451	0.0782	0.0932	0.22193	0.0063444	0.802504	0.0972808	0.115941	81.0043	2.31571	292.914	35.5075	42.3184
BENGKULU	KAB. BENGKULU SELATAN	KOTA MANNA	SIPSN	2019	Bad	2	2.294	837.246	0.1784	0.0051	0.6451	0.0782	0.0932	0.40925	0.0116994	1.47986	0.179391	0.213801	149.376	4.27028	540.149	65.4776	78.0373
BENGKULU	KAB. BENGKULU SELATAN	PINO RAYA	SIPSN	2019	Bad	2	1.654	603.75	0.1784	0.0051	0.6451	0.0782	0.0932	0.295074	0.0084354	1.067	0.129343	0.154153	107.702	3.07892	389.453	47.2101	56.2658
BENGKULU	KAB. BENGKULU SELATAN	KEDURANG ILIR	SIPSN	2019	Bad	2	0.679	247.768	0.1784	0.0051	0.6451	0.0782	0.0932	0.121134	0.0034629	0.438023	0.0530978	0.0632828	44.2138	1.26396	159.878	19.3807	23.0982
BENGKULU	KAB. BENGKULU SELATAN	AIR NIPIS	SIPSN	2019	Bad	2	0.934	340.839	0.1784	0.0051	0.6451	0.0782	0.0932	0.166626	0.0047634	0.602523	0.0730388	0.0870488	60.8183	1.73864	219.921	26.6592	31.7728
BENGKULU	KAB. BENGKULU SELATAN	ULU MANNA	SIPSN	2019	Bad	2	0.613	223.682	0.1784	0.0051	0.6451	0.0782	0.0932	0.109359	0.0031263	0.395446	0.0479366	0.0571316	39.9161	1.1411	144.338	17.4969	20.853
BENGKULU	KAB. BENGKULU SELATAN	BUNGA MAS	SIPSN	2019	Bad	2	0.526	191.92	0.1784	0.0051	0.6451	0.0782	0.0932	0.0938384	0.0026826	0.339323	0.0411332	0.0490232	34.251	0.979149	123.853	15.0136	17.8935
BENGKULU	KAB. BENGKULU SELATAN	PASAR MANNA	SIPSN	2019	Bad	2	1.335	487.226	0.1784	0.0051	0.6451	0.0782	0.0932	0.238164	0.0068085	0.861208	0.104397	0.124422	86.9299	2.4851	314.341	38.1049	45.414
BENGKULU	KAB. REJANG LEBONG	KOTA PADANG	Average of Province	Filling Data	Worst	1	1.301	474.801	0.343	0.0138	0.3994	0.1446	0.0992	0.446243	0.0179538	0.519619	0.188125	0.129059	162.879	6.55314	189.661	68.6655	47.1066
BENGKULU	KAB. REJANG LEBONG	PADANG ULAK TANDING	Average of Province	Filling Data	Worst	1	2.08	759.033	0.343	0.0138	0.3994	0.1446	0.0992	0.71344	0.028704	0.830752	0.300768	0.206336	260.406	10.477	303.224	109.78	75.3126
BENGKULU	KAB. REJANG LEBONG	SINDANG KELINGI	Average of Province	Filling Data	Worst	1	1.413	515.809	0.343	0.0138	0.3994	0.1446	0.0992	0.484659	0.0194994	0.564352	0.20432	0.14017	176.901	7.11728	205.989	74.5767	51.1619
BENGKULU	KAB. REJANG LEBONG	CURUP	Average of Province	Filling Data	Worst	1	2.849	1039.87	0.343	0.0138	0.3994	0.1446	0.0992	0.977207	0.0393162	1.13789	0.411965	0.282621	356.681	14.3504	415.33	150.367	103.157
BENGKULU	KAB. REJANG LEBONG	BERMANI ULU	Average of Province	Filling Data	Worst	1	1.483	541.43	0.343	0.0138	0.3994	0.1446	0.0992	0.508669	0.0204654	0.59231	0.214442	0.147114	185.664	7.46987	216.193	78.2713	53.6965
BENGKULU	KAB. REJANG LEBONG	SELUPU REJANG	Average of Province	Filling Data	Worst	1	3.905	1425.32	0.343	0.0138	0.3994	0.1446	0.0992	1.33942	0.053889	1.55966	0.564663	0.387376	488.886	19.6695	569.275	206.102	141.392
BENGKULU	KAB. REJANG LEBONG	CURUP UTARA	Average of Province	Filling Data	Worst	1	2.031	741.163	0.343	0.0138	0.3994	0.1446	0.0992	0.696633	0.0280278	0.811181	0.293683	0.201475	254.271	10.2301	296.081	107.194	73.5384
BENGKULU	KAB. REJANG LEBONG	CURUP TIMUR	Average of Province	Filling Data	Worst	1	2.778	1013.9	0.343	0.0138	0.3994	0.1446	0.0992	0.952854	0.0383364	1.10953	0.401699	0.275578	347.792	13.9928	404.98	146.62	100.586
BENGKULU	KAB. REJANG LEBONG	CURUP SELATAN	Average of Province	Filling Data	Worst	1	2.527	922.455	0.343	0.0138	0.3994	0.1446	0.0992	0.866761	0.0348726	1.00928	0.365404	0.250678	316.368	12.7285	368.389	133.373	91.4976
BENGKULU	KAB. REJANG LEBONG	CURUP TENGAH	Average of Province	Filling Data	Worst	1	3.597	1312.91	0.343	0.0138	0.3994	0.1446	0.0992	1.23377	0.0496386	1.43664	0.520126	0.356822	450.326	18.1181	524.374	189.846	130.24
BENGKULU	KAB. REJANG LEBONG	BINDURIANG	Average of Province	Filling Data	Worst	1	0.98	357.81	0.343	0.0138	0.3994	0.1446	0.0992	0.33614	0.013524	0.391412	0.141708	0.097216	122.691	4.93626	142.865	51.7234	35.4838
BENGKULU	KAB. REJANG LEBONG	SINDANG BELITI ULU	Average of Province	Filling Data	Worst	1	1.227	447.73	0.343	0.0138	0.3994	0.1446	0.0992	0.420861	0.0169326	0.490064	0.177424	0.121718	153.614	6.1804	178.873	64.7598	44.4272
BENGKULU	KAB. REJANG LEBONG	SINDANG DATARAN	Average of Province	Filling Data	Worst	1	1.104	402.98	0.343	0.0138	0.3994	0.1446	0.0992	0.378672	0.0152352	0.440938	0.159638	0.109517	138.215	5.56085	160.942	58.268	39.9736
BENGKULU	KAB. REJANG LEBONG	SINDANG BELITI ILIR	Average of Province	Filling Data	Worst	1	0.966	352.655	0.343	0.0138	0.3994	0.1446	0.0992	0.331338	0.0133308	0.38582	0.139684	0.0958272	120.938	4.86574	140.824	50.9845	34.9769
BENGKULU	KAB. REJANG LEBONG	BERMANI ULU RAYA	Average of Province	Filling Data	Worst	1	1.308	477.359	0.343	0.0138	0.3994	0.1446	0.0992	0.448644	0.0180504	0.522415	0.189137	0.129754	163.755	6.5884	190.682	69.0349	47.3601
BENGKULU	KAB. BENGKULU UTARA	ENGGANO	SIPSN	2022	Good	4	0.491	179.362	0.0778	0.0099	0.768	0.0487	0.0956	0.0381998	0.0048609	0.377088	0.0239117	0.0469396	13.9429	1.77423	137.637	8.72777	17.133
BENGKULU	KAB. BENGKULU UTARA	KERKAP	SIPSN	2022	Good	4	1.475	538.215	0.0778	0.0099	0.768	0.0487	0.0956	0.114755	0.0146025	1.1328	0.0718325	0.14101	41.8856	5.32991	413.472	26.2189	51.4687
BENGKULU	KAB. BENGKULU UTARA	KOTA ARGA MAKMUR	SIPSN	2022	Good	4	4.98	1817.53	0.0778	0.0099	0.768	0.0487	0.0956	0.387444	0.049302	3.82464	0.242526	0.476088	141.417	17.9952	1395.99	88.522	173.772
BENGKULU	KAB. BENGKULU UTARA	GIRI MULYA	SIPSN	2022	Good	4	1.777	648.454	0.0778	0.0099	0.768	0.0487	0.0956	0.138251	0.0175923	1.36474	0.0865399	0.169881	50.4615	6.42119	498.129	31.5871	62.0066
BENGKULU	KAB. BENGKULU UTARA	PADANG JAYA	SIPSN	2022	Good	4	3.746	1367.18	0.0778	0.0099	0.768	0.0487	0.0956	0.291439	0.0370854	2.87693	0.18243	0.358118	106.375	13.5362	1050.08	66.587	130.713
BENGKULU	KAB. BENGKULU UTARA	LAIS	SIPSN	2022	Good	4	1.598	583.088	0.0778	0.0099	0.768	0.0487	0.0956	0.124324	0.0158202	1.22726	0.0778226	0.152769	45.3784	5.77437	447.951	28.4052	55.7606
BENGKULU	KAB. BENGKULU UTARA	BATIK NAU	SIPSN	2022	Good	4	1.552	566.394	0.0778	0.0099	0.768	0.0487	0.0956	0.120746	0.0153648	1.19194	0.0755824	0.148371	44.0721	5.60815	435.057	27.5876	54.1555
BENGKULU	KAB. BENGKULU UTARA	KETAHUN	SIPSN	2022	Good	4	2.359	861.204	0.0778	0.0099	0.768	0.0487	0.0956	0.18353	0.0233541	1.81171	0.114883	0.22552	66.9885	8.52425	661.275	41.9324	82.3149
BENGKULU	KAB. BENGKULU UTARA	NAPAL PUTIH	SIPSN	2022	Good	4	0.978	356.803	0.0778	0.0099	0.768	0.0487	0.0956	0.0760884	0.0096822	0.751104	0.0476286	0.0934968	27.7723	3.534	274.153	17.3844	34.1263
BENGKULU	KAB. BENGKULU UTARA	PUTRI HIJAU	SIPSN	2022	Good	4	2.69	981.775	0.0778	0.0099	0.768	0.0487	0.0956	0.209282	0.026631	2.06592	0.131003	0.257164	76.3879	9.72031	754.061	47.8161	93.8649
BENGKULU	KAB. BENGKULU UTARA	AIR BESI	SIPSN	2022	Good	4	1.166	425.457	0.0778	0.0099	0.768	0.0487	0.0956	0.0907148	0.0115434	0.895488	0.0567842	0.11147	33.1109	4.21334	326.853	20.7262	40.6864
BENGKULU	KAB. BENGKULU UTARA	AIR NAPAL	SIPSN	2022	Good	4	1.155	421.7	0.0778	0.0099	0.768	0.0487	0.0956	0.089859	0.0114345	0.88704	0.0562485	0.110418	32.7985	4.17359	323.77	20.5307	40.3026
BENGKULU	KAB. BENGKULU UTARA	HULU PALIK	SIPSN	2022	Good	4	1.339	488.561	0.0778	0.0099	0.768	0.0487	0.0956	0.104174	0.0132561	1.02835	0.0652093	0.128008	38.0236	4.83848	375.348	23.8014	46.7231
BENGKULU	KAB. BENGKULU UTARA	AIR PADANG	SIPSN	2022	Good	4	0.773	282.087	0.0778	0.0099	0.768	0.0487	0.0956	0.0601394	0.0076527	0.593664	0.0376451	0.0738988	21.9509	2.79324	216.687	13.7405	26.9731
BENGKULU	KAB. BENGKULU UTARA	ARMA JAYA	SIPSN	2022	Good	4	1.505	549.145	0.0778	0.0099	0.768	0.0487	0.0956	0.117089	0.0148995	1.15584	0.0732935	0.143878	42.7375	5.43832	421.882	26.7521	52.5155
BENGKULU	KAB. BENGKULU UTARA	TANJUNG AGUNG PALIK	SIPSN	2022	Good	4	0.965	352.192	0.0778	0.0099	0.768	0.0487	0.0956	0.075077	0.0095535	0.74112	0.0469955	0.092254	27.4031	3.48703	270.509	17.1534	33.6727
BENGKULU	KAB. BENGKULU UTARA	ULOK KUPAI	SIPSN	2022	Good	4	1.631	595.426	0.0778	0.0099	0.768	0.0487	0.0956	0.126892	0.0161469	1.25261	0.0794297	0.155924	46.3155	5.89362	457.202	28.9918	56.9121
BENGKULU	KAB. BENGKULU UTARA	PINANG RAYA	SIPSN	2022	Good	4	2.816	1028.01	0.0778	0.0099	0.768	0.0487	0.0956	0.219085	0.0278784	2.16269	0.137139	0.26921	79.966	10.1756	789.381	50.0558	98.2615
BENGKULU	KAB. BENGKULU UTARA	MARGA SAKTI SEBELAT	SIPSN	2022	Good	4	1.975	720.908	0.0778	0.0099	0.768	0.0487	0.0956	0.153655	0.0195525	1.5168	0.0961825	0.18881	56.0841	7.13666	553.632	35.1066	68.9156
BENGKULU	KAB. KAUR	KINAL	Average of Province	Filling Data	Worst	1	0.493	179.771	0.1138	0.0087	0.7155	0.0761	0.0859	0.0561034	0.0042891	0.352741	0.0375173	0.0423487	20.4777	1.56552	128.751	13.6938	15.4573
BENGKULU	KAB. KAUR	TANJUNG KEMUNING	Average of Province	Filling Data	Worst	1	1.335	487.454	0.1138	0.0087	0.7155	0.0761	0.0859	0.151923	0.0116145	0.955192	0.101594	0.114677	55.4519	4.23929	348.645	37.0816	41.8569
BENGKULU	KAB. KAUR	KAUR UTARA	Average of Province	Filling Data	Worst	1	0.754	275.297	0.1138	0.0087	0.7155	0.0761	0.0859	0.0858052	0.0065598	0.539487	0.0573794	0.0647686	31.3189	2.39433	196.913	20.9435	23.6405
BENGKULU	KAB. KAUR	KAUR TENGAH	Average of Province	Filling Data	Worst	1	0.492	179.597	0.1138	0.0087	0.7155	0.0761	0.0859	0.0559896	0.0042804	0.352026	0.0374412	0.0422628	20.4362	1.56235	128.489	13.666	15.4259
BENGKULU	KAB. KAUR	KAUR SELATAN	Average of Province	Filling Data	Worst	1	1.64	598.53	0.1138	0.0087	0.7155	0.0761	0.0859	0.186632	0.014268	1.17342	0.124804	0.140876	68.1207	5.20782	428.298	45.5535	51.4197
BENGKULU	KAB. KAUR	MAJE	Average of Province	Filling Data	Worst	1	1.421	518.625	0.1138	0.0087	0.7155	0.0761	0.0859	0.16171	0.0123627	1.01673	0.108138	0.122064	59.0241	4.51239	371.105	39.4704	44.5533
BENGKULU	KAB. KAUR	NASAL	Average of Province	Filling Data	Worst	1	1.613	588.846	0.1138	0.0087	0.7155	0.0761	0.0859	0.183559	0.0140331	1.1541	0.122749	0.138557	66.9992	5.12208	421.247	44.8035	50.5732
BENGKULU	KAB. KAUR	SEMIDANG GUMAY	Average of Province	Filling Data	Worst	1	0.657	239.856	0.1138	0.0087	0.7155	0.0761	0.0859	0.0747666	0.0057159	0.470084	0.0499977	0.0564363	27.2898	2.0863	171.58	18.2492	20.5992
BENGKULU	KAB. KAUR	KELAM TENGAH	Average of Province	Filling Data	Worst	1	0.724	264.155	0.1138	0.0087	0.7155	0.0761	0.0859	0.0823912	0.0062988	0.518022	0.0550964	0.0621916	30.0728	2.29906	189.078	20.1102	22.6999
BENGKULU	KAB. KAUR	LUAS	Average of Province	Filling Data	Worst	1	0.545	199.036	0.1138	0.0087	0.7155	0.0761	0.0859	0.062021	0.0047415	0.389948	0.0414745	0.0468155	22.6377	1.73065	142.331	15.1382	17.0877
BENGKULU	KAB. KAUR	MUARA SAHUNG	Average of Province	Filling Data	Worst	1	0.664	242.182	0.1138	0.0087	0.7155	0.0761	0.0859	0.0755632	0.0057768	0.475092	0.0505304	0.0570376	27.5806	2.10853	173.409	18.4436	20.8187
BENGKULU	KAB. KAUR	TETAP	Average of Province	Filling Data	Worst	1	0.696	253.88	0.1138	0.0087	0.7155	0.0761	0.0859	0.0792048	0.0060552	0.497988	0.0529656	0.0597864	28.9098	2.21015	181.766	19.3324	21.822
BENGKULU	KAB. KAUR	LUNGKANG KULE	Average of Province	Filling Data	Worst	1	0.359	130.862	0.1138	0.0087	0.7155	0.0761	0.0859	0.0408542	0.0031233	0.256864	0.0273199	0.0308381	14.9118	1.14	93.7555	9.97176	11.2559
BENGKULU	KAB. KAUR	PADANG GUCI HILIR	Average of Province	Filling Data	Worst	1	0.388	141.762	0.1138	0.0087	0.7155	0.0761	0.0859	0.0441544	0.0033756	0.277614	0.0295268	0.0333292	16.1164	1.23209	101.329	10.7773	12.1652
BENGKULU	KAB. KAUR	PADANG GUCI HULU	Average of Province	Filling Data	Worst	1	0.786	286.821	0.1138	0.0087	0.7155	0.0761	0.0859	0.0894468	0.0068382	0.562383	0.0598146	0.0675174	32.6481	2.49594	205.27	21.8323	24.6439
BENGKULU	KAB. SELUMA	SUKARAJA	SIPSN	2022	Good	4	3.336	1217.53	0.0409004	0.022	0.7089	0.1074	0.1208	0.136444	0.073392	2.36489	0.358286	0.402989	49.802	26.7881	863.185	130.775	147.091
BENGKULU	KAB. SELUMA	SELUMA	SIPSN	2022	Good	4	1.026	374.451	0.0409004	0.022	0.7089	0.1074	0.1208	0.0419638	0.022572	0.727331	0.110192	0.123941	15.3168	8.23878	265.476	40.2202	45.2384
BENGKULU	KAB. SELUMA	TALO	SIPSN	2022	Good	4	1.223	446.537	0.0409004	0.022	0.7089	0.1074	0.1208	0.0500212	0.026906	0.866984	0.13135	0.147738	18.2577	9.82069	316.449	47.9428	53.9245
BENGKULU	KAB. SELUMA	SEMIDANG ALAS	SIPSN	2022	Good	4	1.523	555.976	0.0409004	0.022	0.7089	0.1074	0.1208	0.0622913	0.033506	1.07965	0.16357	0.183978	22.7363	12.2297	394.074	59.7031	67.1521
BENGKULU	KAB. SELUMA	SEMIDANG ALAS MARAS	SIPSN	2022	Good	4	2.488	908.157	0.0409004	0.022	0.7089	0.1074	0.1208	0.10176	0.054736	1.76374	0.267211	0.30055	37.1425	19.9786	643.766	97.5321	109.701
BENGKULU	KAB. SELUMA	AIR PERIUKAN	SIPSN	2022	Good	4	2.288	835.257	0.0409004	0.022	0.7089	0.1074	0.1208	0.0935801	0.050336	1.62196	0.245731	0.27639	34.1567	18.3726	592.016	89.6919	100.882
BENGKULU	KAB. SELUMA	LUBUK SANDI	SIPSN	2022	Good	4	1.196	436.482	0.0409004	0.022	0.7089	0.1074	0.1208	0.0489169	0.026312	0.847844	0.12845	0.144477	17.8547	9.60388	309.463	46.8844	52.734
BENGKULU	KAB. SELUMA	SELUMA BARAT	SIPSN	2022	Good	4	0.984	359.12	0.0409004	0.022	0.7089	0.1074	0.1208	0.040246	0.021648	0.697557	0.105682	0.118867	14.6898	7.90152	254.608	38.5738	43.3865
BENGKULU	KAB. SELUMA	SELUMA TIMUR	SIPSN	2022	Good	4	1.096	399.979	0.0409004	0.022	0.7089	0.1074	0.1208	0.0448268	0.024112	0.776954	0.11771	0.132397	16.3618	8.80088	283.588	42.9643	48.3248
BENGKULU	KAB. SELUMA	SELUMA UTARA	SIPSN	2022	Good	4	0.931	339.966	0.0409004	0.022	0.7089	0.1074	0.1208	0.0380783	0.020482	0.659986	0.0999894	0.112465	13.8986	7.47593	240.895	36.4961	41.0497
BENGKULU	KAB. SELUMA	SELUMA SELATAN	SIPSN	2022	Good	4	1.356	494.901	0.0409004	0.022	0.7089	0.1074	0.1208	0.0554609	0.029832	0.961268	0.145634	0.163805	20.2432	10.8887	350.863	53.1566	59.7888
BENGKULU	KAB. SELUMA	TALO KECIL	SIPSN	2022	Good	4	1.104	402.988	0.0409004	0.022	0.7089	0.1074	0.1208	0.045154	0.024288	0.782625	0.11857	0.133363	16.4812	8.86512	285.658	43.2779	48.6776
BENGKULU	KAB. SELUMA	ULU TALO	SIPSN	2022	Good	4	0.616	224.862	0.0409004	0.022	0.7089	0.1074	0.1208	0.0251946	0.013552	0.436682	0.0661584	0.0744128	9.19605	4.94648	159.389	24.1478	27.1607
BENGKULU	KAB. SELUMA	ILIR TALO	SIPSN	2022	Good	4	1.615	589.293	0.0409004	0.022	0.7089	0.1074	0.1208	0.0660541	0.03553	1.14487	0.173451	0.195092	24.1098	12.9685	417.879	63.3096	71.2086
BENGKULU	KAB. MUKO MUKO	LUBUK PINANG	Average of Province	Filling Data	Worst	1	1.621	591.678	0.1117	0.0278	0.7509	0.0537	0.0559	0.181066	0.0450638	1.21721	0.0870477	0.0906139	66.089	16.4483	444.281	31.7724	33.0741
BENGKULU	KAB. MUKO MUKO	KOTA MUKOMUKO	Average of Province	Filling Data	Worst	1	2.006	732.19	0.1117	0.0278	0.7509	0.0537	0.0559	0.22407	0.0557668	1.50631	0.107722	0.112135	81.7856	20.3549	549.801	39.3186	40.9294
BENGKULU	KAB. MUKO MUKO	TERAS TERUNJAM	Average of Province	Filling Data	Worst	1	0.87	317.489	0.1117	0.0278	0.7509	0.0537	0.0559	0.097179	0.024186	0.653283	0.046719	0.048633	35.4703	8.82789	238.448	17.0524	17.751
BENGKULU	KAB. MUKO MUKO	PONDOK SUGUH	Average of Province	Filling Data	Worst	1	1.479	539.979	0.1117	0.0278	0.7509	0.0537	0.0559	0.165204	0.0411162	1.11058	0.0794223	0.0826761	60.2996	15.0074	405.362	28.9891	30.1768
BENGKULU	KAB. MUKO MUKO	IPUH	Average of Province	Filling Data	Worst	1	1.96	715.352	0.1117	0.0278	0.7509	0.0537	0.0559	0.218932	0.054488	1.47176	0.105252	0.109564	79.9102	19.8881	537.194	38.417	39.9909
BENGKULU	KAB. MUKO MUKO	MALIN DEMAN	Average of Province	Filling Data	Worst	1	0.735	268.348	0.1117	0.0278	0.7509	0.0537	0.0559	0.0820995	0.020433	0.551911	0.0394695	0.0410865	29.9663	7.45805	201.448	14.4064	14.9966
BENGKULU	KAB. MUKO MUKO	AIR RAMI	Average of Province	Filling Data	Worst	1	1.446	527.646	0.1117	0.0278	0.7509	0.0537	0.0559	0.161518	0.0401988	1.0858	0.0776502	0.0808314	58.9541	14.6726	396.318	28.3423	29.5035
BENGKULU	KAB. MUKO MUKO	TERAMANG JAYA	Average of Province	Filling Data	Worst	1	1.34	489.272	0.1117	0.0278	0.7509	0.0537	0.0559	0.149678	0.037252	1.00621	0.071958	0.074906	54.6325	13.597	367.265	26.2647	27.3407
BENGKULU	KAB. MUKO MUKO	SELAGAN RAYA	Average of Province	Filling Data	Worst	1	1.141	416.573	0.1117	0.0278	0.7509	0.0537	0.0559	0.12745	0.0317198	0.856777	0.0612717	0.0637819	46.5191	11.5777	312.724	22.3642	23.2804
BENGKULU	KAB. MUKO MUKO	PENARIK	Average of Province	Filling Data	Worst	1	2.648	966.365	0.1117	0.0278	0.7509	0.0537	0.0559	0.295782	0.0736144	1.98838	0.142198	0.148023	107.96	26.8693	725.76	51.9021	54.0285
BENGKULU	KAB. MUKO MUKO	XIV KOTO	Average of Province	Filling Data	Worst	1	1.476	538.643	0.1117	0.0278	0.7509	0.0537	0.0559	0.164869	0.0410328	1.10833	0.0792612	0.0825084	60.1773	14.977	404.54	28.9303	30.1156
BENGKULU	KAB. MUKO MUKO	V KOTO	Average of Province	Filling Data	Worst	1	0.824	300.879	0.1117	0.0278	0.7509	0.0537	0.0559	0.0920408	0.0229072	0.618742	0.0442488	0.0460616	33.5949	8.36113	225.841	16.1508	16.8125
BENGKULU	KAB. MUKO MUKO	AIR MAJUNTO	Average of Province	Filling Data	Worst	1	1.273	464.568	0.1117	0.0278	0.7509	0.0537	0.0559	0.142194	0.0353894	0.955896	0.0683601	0.0711607	51.9008	12.9171	348.902	24.9514	25.9737
BENGKULU	KAB. MUKO MUKO	AIR DIKIT	Average of Province	Filling Data	Worst	1	0.755	275.488	0.1117	0.0278	0.7509	0.0537	0.0559	0.0843335	0.020989	0.566929	0.0405435	0.0422045	30.7817	7.66098	206.929	14.7984	15.4046
BENGKULU	KAB. MUKO MUKO	SUNGAI RUMBAI	Average of Province	Filling Data	Worst	1	1.008	367.928	0.1117	0.0278	0.7509	0.0537	0.0559	0.112594	0.0280224	0.756907	0.0541296	0.0563472	41.0967	10.2282	276.271	19.7573	20.5667
BENGKULU	KAB. LEBONG	LEBONG UTARA	SIPSN	2022	Good	4	1.317	480.685	0.421806	0.0162	0.0147941	0.516	0.0312	0.555518	0.0213354	0.0194838	0.679572	0.0410904	202.764	7.78742	7.11158	248.044	14.998
BENGKULU	KAB. LEBONG	LEBONG ATAS	SIPSN	2022	Good	4	0.478	174.391	0.421806	0.0162	0.0147941	0.516	0.0312	0.201623	0.0077436	0.00707156	0.246648	0.0149136	73.5925	2.82641	2.58112	90.0265	5.44346
BENGKULU	KAB. LEBONG	LEBONG TENGAH	SIPSN	2022	Good	4	0.889	324.511	0.421806	0.0162	0.0147941	0.516	0.0312	0.374985	0.0144018	0.0131519	0.458724	0.0277368	136.87	5.25666	4.80045	167.434	10.1239
BENGKULU	KAB. LEBONG	LEBONG SELATAN	SIPSN	2022	Good	4	1.198	437.198	0.421806	0.0162	0.0147941	0.516	0.0312	0.505324	0.0194076	0.0177233	0.618168	0.0373776	184.443	7.08377	6.469	225.631	13.6428
BENGKULU	KAB. LEBONG	RIMBO PENGADANG	SIPSN	2022	Good	4	0.381	138.985	0.421806	0.0162	0.0147941	0.516	0.0312	0.160708	0.0061722	0.00563654	0.196596	0.0118872	58.6584	2.25285	2.05734	71.7575	4.33883
BENGKULU	KAB. LEBONG	TOPOS	SIPSN	2022	Good	4	0.505	184.276	0.421806	0.0162	0.0147941	0.516	0.0312	0.213012	0.008181	0.007471	0.26058	0.015756	77.7494	2.98607	2.72692	95.1117	5.75094
BENGKULU	KAB. LEBONG	BINGIN KUNING	SIPSN	2022	Good	4	0.846	308.627	0.421806	0.0162	0.0147941	0.516	0.0312	0.356848	0.0137052	0.0125158	0.436536	0.0263952	130.249	5.0024	4.56826	159.336	9.63425
BENGKULU	KAB. LEBONG	LEBONG SAKTI	SIPSN	2022	Good	4	0.725	264.446	0.421806	0.0162	0.0147941	0.516	0.0312	0.305809	0.011745	0.0107257	0.3741	0.02262	111.62	4.28693	3.91488	136.547	8.2563
BENGKULU	KAB. LEBONG	TUBEI	SIPSN	2022	Good	4	0.6	218.988	0.421806	0.0162	0.0147941	0.516	0.0312	0.253084	0.00972	0.00887644	0.3096	0.01872	92.3755	3.5478	3.2399	113.004	6.8328
BENGKULU	KAB. LEBONG	AMEN	SIPSN	2022	Good	4	0.701	255.727	0.421806	0.0162	0.0147941	0.516	0.0312	0.295686	0.0113562	0.0103706	0.361716	0.0218712	107.925	4.14501	3.78528	132.026	7.98299
BENGKULU	KAB. LEBONG	URAM JAYA	SIPSN	2022	Good	4	0.437	159.534	0.421806	0.0162	0.0147941	0.516	0.0312	0.184329	0.0070794	0.006465	0.225492	0.0136344	67.2802	2.58398	2.35973	82.3046	4.97656
BENGKULU	KAB. LEBONG	PINANG BELAPIS	SIPSN	2022	Good	4	0.46	167.809	0.421806	0.0162	0.0147941	0.516	0.0312	0.194031	0.007452	0.00680527	0.23736	0.014352	70.8212	2.71998	2.48392	86.6364	5.23848
BENGKULU	KAB. KEPAHIANG	BERMANI ILIR	SIPSN	2020	Bad	2	1.125	410.616	0.4687	0.0139	0.2442	0.1569	0.1163	0.527287	0.0156375	0.274725	0.176512	0.130838	192.46	5.70769	100.275	64.4271	47.7557
BENGKULU	KAB. KEPAHIANG	UJAN MAS	SIPSN	2020	Bad	2	1.765	644.297	0.4687	0.0139	0.2442	0.1569	0.1163	0.827255	0.0245335	0.431013	0.276928	0.20527	301.948	8.95473	157.32	101.079	74.9234
BENGKULU	KAB. KEPAHIANG	TEBAT KARAI	SIPSN	2020	Bad	2	1.102	402.069	0.4687	0.0139	0.2442	0.1569	0.1163	0.516507	0.0153178	0.269108	0.172904	0.128163	188.525	5.591	98.2246	63.1099	46.7793
BENGKULU	KAB. KEPAHIANG	KEPAHIANG	SIPSN	2020	Bad	2	3.771	1376.26	0.4687	0.0139	0.2442	0.1569	0.1163	1.76747	0.0524169	0.920878	0.59167	0.438567	645.126	19.1322	336.121	215.96	160.077
BENGKULU	KAB. KEPAHIANG	MERIGI	SIPSN	2020	Bad	2	0.85	310.369	0.4687	0.0139	0.2442	0.1569	0.1163	0.398395	0.011815	0.20757	0.133365	0.098855	145.414	4.31248	75.7631	48.6782	36.0821
BENGKULU	KAB. KEPAHIANG	KEBAWETAN	SIPSN	2020	Bad	2	0.989	360.862	0.4687	0.0139	0.2442	0.1569	0.1163	0.463544	0.0137471	0.241514	0.155174	0.115021	169.194	5.01769	88.1525	56.6385	41.9826
BENGKULU	KAB. KEPAHIANG	SEBERANG MUSI	SIPSN	2020	Bad	2	0.584	213.156	0.4687	0.0139	0.2442	0.1569	0.1163	0.273721	0.0081176	0.142613	0.0916296	0.0679192	99.9081	2.96292	52.0537	33.4448	24.7905
BENGKULU	KAB. KEPAHIANG	MUARA KEMUMU	SIPSN	2020	Bad	2	0.913	333.083	0.4687	0.0139	0.2442	0.1569	0.1163	0.427923	0.0126907	0.222955	0.14325	0.106182	156.192	4.63211	81.3784	52.2861	38.7564
BENGKULU	KAB. BENGKULU TENGAH	KARANG TINGGI	SIPSN	2020	Bad	2	1.236	451.007	0.0794	0.0111	0.5988	0.052	0.2587	0.0981384	0.0137196	0.740117	0.064272	0.319753	35.8205	5.00765	270.143	23.4593	116.71
BENGKULU	KAB. BENGKULU TENGAH	TALANG EMPAT	SIPSN	2020	Bad	2	1.21	441.53	0.0794	0.0111	0.5988	0.052	0.2587	0.096074	0.013431	0.724548	0.06292	0.313027	35.067	4.90231	264.46	22.9658	114.255
BENGKULU	KAB. BENGKULU TENGAH	PONDOK KELAPA	SIPSN	2020	Bad	2	2.971	1084.46	0.0794	0.0111	0.5988	0.052	0.2587	0.235897	0.0329781	1.77903	0.154492	0.768598	86.1026	12.037	649.348	56.3896	280.538
BENGKULU	KAB. BENGKULU TENGAH	PEMATANG TIGA	SIPSN	2020	Bad	2	0.736	268.493	0.0794	0.0111	0.5988	0.052	0.2587	0.0584384	0.0081696	0.440717	0.038272	0.190403	21.33	2.9819	160.862	13.9693	69.4972
BENGKULU	KAB. BENGKULU TENGAH	PAGAR JATI	SIPSN	2020	Bad	2	0.694	253.325	0.0794	0.0111	0.5988	0.052	0.2587	0.0551036	0.0077034	0.415567	0.036088	0.179538	20.1128	2.81174	151.682	13.1721	65.5313
BENGKULU	KAB. BENGKULU TENGAH	TABA PENANJUNG	SIPSN	2020	Bad	2	1.138	415.427	0.0794	0.0111	0.5988	0.052	0.2587	0.0903572	0.0126318	0.681434	0.059176	0.294401	32.9804	4.61061	248.724	21.5992	107.456
BENGKULU	KAB. BENGKULU TENGAH	MERIGI KELINDANG	SIPSN	2020	Bad	2	0.699	255.303	0.0794	0.0111	0.5988	0.052	0.2587	0.0555006	0.0077589	0.418561	0.036348	0.180831	20.2577	2.832	152.775	13.267	66.0034
BENGKULU	KAB. BENGKULU TENGAH	MERIGI SAKTI	SIPSN	2020	Bad	2	0.63	229.894	0.0794	0.0111	0.5988	0.052	0.2587	0.050022	0.006993	0.377244	0.03276	0.162981	18.258	2.55245	137.694	11.9574	59.4881
BENGKULU	KAB. BENGKULU TENGAH	PONDOK KUBANG	SIPSN	2020	Bad	2	0.991	361.763	0.0794	0.0111	0.5988	0.052	0.2587	0.0786854	0.0110001	0.593411	0.051532	0.256372	28.7202	4.01504	216.595	18.8092	93.5757
BENGKULU	KAB. BENGKULU TENGAH	BANG HAJI	SIPSN	2020	Bad	2	0.657	239.926	0.0794	0.0111	0.5988	0.052	0.2587	0.0521658	0.0072927	0.393412	0.034164	0.169966	19.0405	2.66184	143.595	12.4699	62.0376
BENGKULU	KAB. BENGKULU TENGAH	SEMIDANG LAGAN	SIPSN	2020	Bad	2	0.562	205.145	0.0794	0.0111	0.5988	0.052	0.2587	0.0446228	0.0062382	0.336526	0.029224	0.145389	16.2873	2.27694	122.832	10.6668	53.0671
BENGKULU	KOTA BENGKULU	SELEBAR	Average of Province	Filling Data	Worst	1	7.86	2868.84	0.6819	0.001	0.2832	0.0155	0.0184	5.35973	0.00786	2.22595	0.12183	0.144624	1956.3	2.8689	812.472	44.468	52.7878
BENGKULU	KOTA BENGKULU	GADING CEMPAKA	Average of Province	Filling Data	Worst	1	3.689	1346.6	0.6819	0.001	0.2832	0.0155	0.0184	2.51553	0.003689	1.04472	0.0571795	0.0678776	918.168	1.34648	381.325	20.8705	24.7753
BENGKULU	KOTA BENGKULU	TELUK SEGARA	Average of Province	Filling Data	Worst	1	2.099	766.152	0.6819	0.001	0.2832	0.0155	0.0184	1.43131	0.002099	0.594437	0.0325345	0.0386216	522.427	0.766135	216.969	11.8751	14.0969
BENGKULU	KOTA BENGKULU	MUARA BANGKA HULU	Average of Province	Filling Data	Worst	1	4.951	1807.22	0.6819	0.001	0.2832	0.0155	0.0184	3.37609	0.004951	1.40212	0.0767405	0.0910984	1232.27	1.80711	511.775	28.0103	33.2509
BENGKULU	KOTA BENGKULU	KAMPUNG MELAYU	Average of Province	Filling Data	Worst	1	4.435	1618.7	0.6819	0.001	0.2832	0.0155	0.0184	3.02423	0.004435	1.25599	0.0687425	0.081604	1103.84	1.61877	458.437	25.091	29.7855
BENGKULU	KOTA BENGKULU	RATU AGUNG	Average of Province	Filling Data	Worst	1	4.961	1810.59	0.6819	0.001	0.2832	0.0155	0.0184	3.38291	0.004961	1.40496	0.0768955	0.0912824	1234.76	1.81076	512.809	28.0669	33.3181
BENGKULU	KOTA BENGKULU	RATU SAMBAN	Average of Province	Filling Data	Worst	1	2.087	761.917	0.6819	0.001	0.2832	0.0155	0.0184	1.42313	0.002087	0.591038	0.0323485	0.0384008	519.441	0.761755	215.729	11.8072	14.0163
BENGKULU	KOTA BENGKULU	SUNGAI SERUT	Average of Province	Filling Data	Worst	1	2.407	878.444	0.6819	0.001	0.2832	0.0155	0.0184	1.64133	0.002407	0.681662	0.0373085	0.0442888	599.087	0.878555	248.807	13.6176	16.1654
BENGKULU	KOTA BENGKULU	SINGARAN PATI	Average of Province	Filling Data	Worst	1	3.87	1412.45	0.6819	0.001	0.2832	0.0155	0.0184	2.63895	0.00387	1.09598	0.059985	0.071208	963.218	1.41255	400.034	21.8945	25.9909
LAMPUNG	KAB. LAMPUNG SELATAN	NATAR	Average of Province	Filling Data	Worst	1	15.333	5596.46	0.0889	0.0082	0.8547	0.0354	0.0128	1.3631	0.125731	13.1051	0.542788	0.196262	497.533	45.8917	4783.37	198.118	71.6358
LAMPUNG	KAB. LAMPUNG SELATAN	TANJUNG BINTANG	Average of Province	Filling Data	Worst	1	6.675	2436.54	0.0889	0.0082	0.8547	0.0354	0.0128	0.593407	0.054735	5.70512	0.236295	0.08544	216.594	19.9783	2082.37	86.2477	31.1856
LAMPUNG	KAB. LAMPUNG SELATAN	KALIANDA	Average of Province	Filling Data	Worst	1	7.681	2803.39	0.0889	0.0082	0.8547	0.0354	0.0128	0.682841	0.0629842	6.56495	0.271907	0.0983168	249.237	22.9892	2396.21	99.2462	35.8856
LAMPUNG	KAB. LAMPUNG SELATAN	SIDOMULYO	Average of Province	Filling Data	Worst	1	5.271	1924.05	0.0889	0.0082	0.8547	0.0354	0.0128	0.468592	0.0432222	4.50512	0.186593	0.0674688	171.036	15.7761	1644.37	68.1066	24.6261
LAMPUNG	KAB. LAMPUNG SELATAN	KATIBUNG	Average of Province	Filling Data	Worst	1	5.828	2127.07	0.0889	0.0082	0.8547	0.0354	0.0128	0.518109	0.0477896	4.98119	0.206311	0.0745984	189.11	17.4432	1818.13	75.3036	27.2284
LAMPUNG	KAB. LAMPUNG SELATAN	PENENGAHAN	Average of Province	Filling Data	Worst	1	3.429	1251.75	0.0889	0.0082	0.8547	0.0354	0.0128	0.304838	0.0281178	2.93077	0.121387	0.0438912	111.266	10.263	1069.73	44.3061	16.0203
LAMPUNG	KAB. LAMPUNG SELATAN	PALAS	Average of Province	Filling Data	Worst	1	4.95	1806.78	0.0889	0.0082	0.8547	0.0354	0.0128	0.440055	0.04059	4.23076	0.17523	0.06336	160.62	14.8153	1544.23	63.959	23.1264
LAMPUNG	KAB. LAMPUNG SELATAN	JATI AGUNG	Average of Province	Filling Data	Worst	1	9.595	3502.32	0.0889	0.0082	0.8547	0.0354	0.0128	0.852996	0.078679	8.20085	0.339663	0.122816	311.343	28.7178	2993.31	123.977	44.8278
LAMPUNG	KAB. LAMPUNG SELATAN	KETAPANG	Average of Province	Filling Data	Worst	1	4.295	1567.63	0.0889	0.0082	0.8547	0.0354	0.0128	0.381825	0.035219	3.67094	0.152043	0.054976	139.366	12.8549	1339.89	55.4957	20.0662
LAMPUNG	KAB. LAMPUNG SELATAN	SRAGI	Average of Province	Filling Data	Worst	1	2.875	1049.5	0.0889	0.0082	0.8547	0.0354	0.0128	0.255587	0.023575	2.45726	0.101775	0.0368	93.2894	8.60487	896.901	37.1479	13.432
LAMPUNG	KAB. LAMPUNG SELATAN	RAJA BASA	Average of Province	Filling Data	Worst	1	2.007	732.39	0.0889	0.0082	0.8547	0.0354	0.0128	0.178422	0.0164574	1.71538	0.0710478	0.0256896	65.1241	6.00695	626.115	25.9324	9.3767
LAMPUNG	KAB. LAMPUNG SELATAN	CANDIPURO	Average of Province	Filling Data	Worst	1	4.66	1700.83	0.0889	0.0082	0.8547	0.0354	0.0128	0.414274	0.038212	3.9829	0.164964	0.059648	151.21	13.9474	1453.76	60.2119	21.7715
LAMPUNG	KAB. LAMPUNG SELATAN	MERBAU MATARAM	Average of Province	Filling Data	Worst	1	4.513	1647.12	0.0889	0.0082	0.8547	0.0354	0.0128	0.401206	0.0370066	3.85726	0.15976	0.0577664	146.44	13.5074	1407.9	58.3125	21.0847
LAMPUNG	KAB. LAMPUNG SELATAN	BAKAUHENI	Average of Province	Filling Data	Worst	1	1.945	709.851	0.0889	0.0082	0.8547	0.0354	0.0128	0.17291	0.015949	1.66239	0.068853	0.024896	63.1123	5.82138	606.773	25.1313	9.08704
LAMPUNG	KAB. LAMPUNG SELATAN	TANJUNG SARI	Average of Province	Filling Data	Worst	1	2.62	956.432	0.0889	0.0082	0.8547	0.0354	0.0128	0.232918	0.021484	2.23931	0.092748	0.033536	85.0151	7.84166	817.35	33.853	12.2406
LAMPUNG	KAB. LAMPUNG SELATAN	WAY SULAN	Average of Province	Filling Data	Worst	1	1.982	723.495	0.0889	0.0082	0.8547	0.0354	0.0128	0.1762	0.0162524	1.69402	0.0701628	0.0253696	64.3129	5.93213	618.316	25.6094	9.2599
LAMPUNG	KAB. LAMPUNG SELATAN	WAY PANJI	Average of Province	Filling Data	Worst	1	1.461	533.404	0.0889	0.0082	0.8547	0.0354	0.0128	0.129883	0.0119802	1.24872	0.0517194	0.0187008	47.4073	4.37277	455.782	18.8776	6.82579
LAMPUNG	KAB. LAMPUNG TENGAH	KALIREJO	SIPSN	2022	Good	4	4.236	1546.3	0.177539	0.0108	0.796861	0.0056	0.0092	0.752056	0.0457488	3.3755	0.0237216	0.0389712	274.5	16.6983	1232.06	8.65838	14.2245
LAMPUNG	KAB. LAMPUNG TENGAH	BANGUN REJO	SIPSN	2022	Good	4	3.852	1406.12	0.177539	0.0108	0.796861	0.0056	0.0092	0.683881	0.0416016	3.06951	0.0215712	0.0354384	249.617	15.1846	1120.37	7.87349	12.935
LAMPUNG	KAB. LAMPUNG TENGAH	PADANG RATU	SIPSN	2022	Good	4	3.213	1172.61	0.177539	0.0108	0.796861	0.0056	0.0092	0.570433	0.0347004	2.56031	0.0179928	0.0295596	208.208	12.6656	934.515	6.56737	10.7893
LAMPUNG	KAB. LAMPUNG TENGAH	GUNUNG SUGIH	SIPSN	2022	Good	4	4.319	1576.52	0.177539	0.0108	0.796861	0.0056	0.0092	0.766792	0.0466452	3.44164	0.0241864	0.0397348	279.879	17.0255	1256.2	8.82804	14.5032
LAMPUNG	KAB. LAMPUNG TENGAH	TRIMURJO	SIPSN	2022	Good	4	3.177	1159.59	0.177539	0.0108	0.796861	0.0056	0.0092	0.564042	0.0343116	2.53163	0.0177912	0.0292284	205.875	12.5237	924.044	6.49379	10.6684
LAMPUNG	KAB. LAMPUNG TENGAH	PUNGGUR	SIPSN	2022	Good	4	2.384	870.267	0.177539	0.0108	0.796861	0.0056	0.0092	0.423253	0.0257472	1.89972	0.0133504	0.0219328	154.487	9.39773	693.396	4.8729	8.00547
LAMPUNG	KAB. LAMPUNG TENGAH	TERBANGGI BESAR	SIPSN	2022	Good	4	7.063	2577.9	0.177539	0.0108	0.796861	0.0056	0.0092	1.25396	0.0762804	5.62823	0.0395528	0.0649796	457.695	27.8423	2054.3	14.4368	23.7176
LAMPUNG	KAB. LAMPUNG TENGAH	SEPUTIH RAMAN	SIPSN	2022	Good	4	2.969	1083.67	0.177539	0.0108	0.796861	0.0056	0.0092	0.527114	0.0320652	2.36588	0.0166264	0.0273148	192.397	11.7038	863.546	6.06864	9.9699
LAMPUNG	KAB. LAMPUNG TENGAH	RUMBIA	SIPSN	2022	Good	4	2.286	834.234	0.177539	0.0108	0.796861	0.0056	0.0092	0.405855	0.0246888	1.82162	0.0128016	0.0210312	148.137	9.01141	664.893	4.67258	7.67639
LAMPUNG	KAB. LAMPUNG TENGAH	SEPUTIH BANYAK	SIPSN	2022	Good	4	2.86	1043.72	0.177539	0.0108	0.796861	0.0056	0.0092	0.507762	0.030888	2.27902	0.016016	0.026312	185.333	11.2741	831.843	5.84584	9.60388
LAMPUNG	KAB. LAMPUNG TENGAH	SEPUTIH MATARAM	SIPSN	2022	Good	4	3.167	1155.88	0.177539	0.0108	0.796861	0.0056	0.0092	0.562267	0.0342036	2.52366	0.0177352	0.0291364	205.227	12.4843	921.135	6.47335	10.6348
LAMPUNG	KAB. LAMPUNG TENGAH	SEPUTIH SURABAYA	SIPSN	2022	Good	4	2.914	1063.62	0.177539	0.0108	0.796861	0.0056	0.0092	0.517349	0.0314712	2.32205	0.0163184	0.0268088	188.832	11.487	847.549	5.95622	9.78521
LAMPUNG	KAB. LAMPUNG TENGAH	TERUSAN NUNYAI	SIPSN	2022	Good	4	2.973	1085.02	0.177539	0.0108	0.796861	0.0056	0.0092	0.527824	0.0321084	2.36907	0.0166488	0.0273516	192.656	11.7196	864.71	6.07681	9.98333
LAMPUNG	KAB. LAMPUNG TENGAH	BUMI RATU NUBAN	SIPSN	2022	Good	4	1.971	719.508	0.177539	0.0108	0.796861	0.0056	0.0092	0.34993	0.0212868	1.57061	0.0110376	0.0181332	127.724	7.76968	573.274	4.02872	6.61862
LAMPUNG	KAB. LAMPUNG TENGAH	BEKRI	SIPSN	2022	Good	4	1.727	630.319	0.177539	0.0108	0.796861	0.0056	0.0092	0.30661	0.0186516	1.37618	0.0096712	0.0158884	111.913	6.80783	502.305	3.52999	5.79927
LAMPUNG	KAB. LAMPUNG TENGAH	SEPUTIH AGUNG	SIPSN	2022	Good	4	3.207	1170.71	0.177539	0.0108	0.796861	0.0056	0.0092	0.569368	0.0346356	2.55553	0.0179592	0.0295044	207.819	12.642	932.769	6.55511	10.7691
LAMPUNG	KAB. LAMPUNG TENGAH	WAY PANGUBUAN	SIPSN	2022	Good	4	2.638	962.864	0.177539	0.0108	0.796861	0.0056	0.0092	0.468348	0.0284904	2.10212	0.0147728	0.0242696	170.947	10.399	767.273	5.39207	8.8584
LAMPUNG	KAB. LAMPUNG TENGAH	BANDAR MATARAM	SIPSN	2022	Good	4	4.273	1559.51	0.177539	0.0108	0.796861	0.0056	0.0092	0.758625	0.0461484	3.40499	0.0239288	0.0393116	276.898	16.8442	1242.82	8.73401	14.3487
LAMPUNG	KAB. LAMPUNG TENGAH	PUBIAN	SIPSN	2022	Good	4	2.769	1010.85	0.177539	0.0108	0.796861	0.0056	0.0092	0.491606	0.0299052	2.20651	0.0155064	0.0254748	179.436	10.9154	805.375	5.65984	9.2983
LAMPUNG	KAB. LAMPUNG TENGAH	SELAGAI LINGGA	SIPSN	2022	Good	4	2.06	751.797	0.177539	0.0108	0.796861	0.0056	0.0092	0.365731	0.022248	1.64153	0.011536	0.018952	133.492	8.12052	599.16	4.21064	6.91748
LAMPUNG	KAB. LAMPUNG TENGAH	ANAK TUHA	SIPSN	2022	Good	4	2.509	915.745	0.177539	0.0108	0.796861	0.0056	0.0092	0.445446	0.0270972	1.99932	0.0140504	0.0230828	162.588	9.89048	729.753	5.1284	8.42522
LAMPUNG	KAB. LAMPUNG TENGAH	SENDANG AGUNG	SIPSN	2022	Good	4	2.443	891.618	0.177539	0.0108	0.796861	0.0056	0.0092	0.433728	0.0263844	1.94673	0.0136808	0.0224756	158.311	9.63031	710.557	4.99349	8.20359
LAMPUNG	KAB. LAMPUNG TENGAH	KOTA GAJAH	SIPSN	2022	Good	4	2.035	742.794	0.177539	0.0108	0.796861	0.0056	0.0092	0.361292	0.021978	1.62161	0.011396	0.018722	131.872	8.02197	591.888	4.15954	6.83353
LAMPUNG	KAB. LAMPUNG TENGAH	BUMI NABUNG	SIPSN	2022	Good	4	2.098	765.764	0.177539	0.0108	0.796861	0.0056	0.0092	0.372477	0.0226584	1.67181	0.0117488	0.0193016	135.954	8.27032	610.212	4.28831	7.04508
LAMPUNG	KAB. LAMPUNG TENGAH	WAY SEPUTIH	SIPSN	2022	Good	4	1.159	423.059	0.177539	0.0108	0.796861	0.0056	0.0092	0.205768	0.0125172	0.923562	0.0064904	0.0106628	75.1053	4.56878	337.1	2.369	3.89192
LAMPUNG	KAB. LAMPUNG TENGAH	BANDAR SURABAYA	SIPSN	2022	Good	4	2.235	815.765	0.177539	0.0108	0.796861	0.0056	0.0092	0.3968	0.024138	1.78098	0.012516	0.020562	144.832	8.81037	650.059	4.56834	7.50513
LAMPUNG	KAB. LAMPUNG TENGAH	ANAK RATU AJI	SIPSN	2022	Good	4	1.079	393.841	0.177539	0.0108	0.796861	0.0056	0.0092	0.191565	0.0116532	0.859813	0.0060424	0.0099268	69.9211	4.25342	313.832	2.20548	3.62328
LAMPUNG	KAB. LAMPUNG TENGAH	PUTRA RUMBIA	SIPSN	2022	Good	4	1.241	452.803	0.177539	0.0108	0.796861	0.0056	0.0092	0.220326	0.0134028	0.988904	0.0069496	0.0114172	80.419	4.89202	360.95	2.5366	4.16728
LAMPUNG	KAB. LAMPUNG UTARA	BUKIT KEMUNING	Average of Province	Filling Data	Worst	1	3.395	1239.02	0.1212	0.0045	0.7672	0.0353	0.0718	0.411474	0.0152775	2.60464	0.119843	0.243761	150.188	5.57629	950.695	43.7429	88.9728
LAMPUNG	KAB. LAMPUNG UTARA	KOTABUMI	Average of Province	Filling Data	Worst	1	4.454	1625.75	0.1212	0.0045	0.7672	0.0353	0.0718	0.539825	0.020043	3.41711	0.157226	0.319797	197.036	7.3157	1247.24	57.3876	116.726
LAMPUNG	KAB. LAMPUNG UTARA	SUNGKAI SELATAN	Average of Province	Filling Data	Worst	1	1.883	687.427	0.1212	0.0045	0.7672	0.0353	0.0718	0.22822	0.0084735	1.44464	0.0664699	0.135199	83.3002	3.09283	527.293	24.2615	49.3478
LAMPUNG	KAB. LAMPUNG UTARA	TANJUNG RAJA	Average of Province	Filling Data	Worst	1	2.618	955.631	0.1212	0.0045	0.7672	0.0353	0.0718	0.317302	0.011781	2.00853	0.0924154	0.187972	115.815	4.30007	733.113	33.7316	68.6099
LAMPUNG	KAB. LAMPUNG UTARA	ABUNG TIMUR	Average of Province	Filling Data	Worst	1	3.008	1098.1	0.1212	0.0045	0.7672	0.0353	0.0718	0.36457	0.013536	2.30774	0.106182	0.215974	133.068	4.94064	842.324	38.7566	78.8307
LAMPUNG	KAB. LAMPUNG UTARA	ABUNG BARAT	Average of Province	Filling Data	Worst	1	1.663	607.055	0.1212	0.0045	0.7672	0.0353	0.0718	0.201556	0.0074835	1.27585	0.0587039	0.119403	73.5678	2.73148	465.687	21.4269	43.5822
LAMPUNG	KAB. LAMPUNG UTARA	ABUNG SELATAN	Average of Province	Filling Data	Worst	1	4.197	1532.05	0.1212	0.0045	0.7672	0.0353	0.0718	0.508676	0.0188865	3.21994	0.148154	0.301345	185.667	6.89357	1175.28	54.0762	109.991
LAMPUNG	KAB. LAMPUNG UTARA	SUNGKAI UTARA	Average of Province	Filling Data	Worst	1	2.9	1058.6	0.1212	0.0045	0.7672	0.0353	0.0718	0.35148	0.01305	2.22488	0.10237	0.20822	128.29	4.76325	812.081	37.365	76.0003
LAMPUNG	KAB. LAMPUNG UTARA	KOTABUMI UTARA	Average of Province	Filling Data	Worst	1	2.78	1014.64	0.1212	0.0045	0.7672	0.0353	0.0718	0.336936	0.01251	2.13282	0.098134	0.199604	122.982	4.56615	778.478	35.8189	72.8555
LAMPUNG	KAB. LAMPUNG UTARA	KOTABUMI SELATAN	Average of Province	Filling Data	Worst	1	5.62	2051.41	0.1212	0.0045	0.7672	0.0353	0.0718	0.681144	0.02529	4.31166	0.198386	0.403516	248.618	9.23085	1573.76	72.4109	147.283
LAMPUNG	KAB. LAMPUNG UTARA	ABUNG TENGAH	Average of Province	Filling Data	Worst	1	1.404	512.438	0.1212	0.0045	0.7672	0.0353	0.0718	0.170165	0.006318	1.07715	0.0495612	0.100807	62.1102	2.30607	393.159	18.0898	36.7946
LAMPUNG	KAB. LAMPUNG UTARA	ABUNG TINGGI	Average of Province	Filling Data	Worst	1	1.468	535.749	0.1212	0.0045	0.7672	0.0353	0.0718	0.177922	0.006606	1.12625	0.0518204	0.105402	64.9414	2.41119	411.081	18.9144	38.4719
LAMPUNG	KAB. LAMPUNG UTARA	ABUNG SEMULI	Average of Province	Filling Data	Worst	1	2.157	787.392	0.1212	0.0045	0.7672	0.0353	0.0718	0.261428	0.0097065	1.65485	0.0761421	0.154873	95.4214	3.54287	604.02	27.7919	56.5285
LAMPUNG	KAB. LAMPUNG UTARA	ABUNG SURAKARTA	Average of Province	Filling Data	Worst	1	2.329	850.231	0.1212	0.0045	0.7672	0.0353	0.0718	0.282275	0.0104805	1.78681	0.0822137	0.167222	103.03	3.82538	652.185	30.008	61.0361
LAMPUNG	KAB. LAMPUNG UTARA	MUARA SUNGKAI	Average of Province	Filling Data	Worst	1	1.193	435.269	0.1212	0.0045	0.7672	0.0353	0.0718	0.144592	0.0053685	0.91527	0.0421129	0.0856574	52.7759	1.9595	334.073	15.3712	31.265
LAMPUNG	KAB. LAMPUNG UTARA	BUNGA MAYANG	Average of Province	Filling Data	Worst	1	2.683	979.456	0.1212	0.0045	0.7672	0.0353	0.0718	0.32518	0.0120735	2.0584	0.0947099	0.192639	118.691	4.40683	751.315	34.5691	70.3134
LAMPUNG	KAB. LAMPUNG UTARA	HULU SUNGKAI	Average of Province	Filling Data	Worst	1	1.202	438.845	0.1212	0.0045	0.7672	0.0353	0.0718	0.145682	0.005409	0.922174	0.0424306	0.0863036	53.1741	1.97429	336.594	15.4872	31.5008
LAMPUNG	KAB. LAMPUNG UTARA	SUNGKAI TENGAH	Average of Province	Filling Data	Worst	1	1.419	517.987	0.1212	0.0045	0.7672	0.0353	0.0718	0.171983	0.0063855	1.08866	0.0500907	0.101884	62.7737	2.33071	397.36	18.2831	37.1877
LAMPUNG	KAB. LAMPUNG UTARA	ABUNG PEKURUN	Average of Province	Filling Data	Worst	1	1.018	371.687	0.1212	0.0045	0.7672	0.0353	0.0718	0.123382	0.004581	0.78101	0.0359354	0.0730924	45.0343	1.67207	285.069	13.1164	26.6787
LAMPUNG	KAB. LAMPUNG UTARA	SUNGKAI JAYA	Average of Province	Filling Data	Worst	1	0.788	287.481	0.1212	0.0045	0.7672	0.0353	0.0718	0.0955056	0.003546	0.604554	0.0278164	0.0565784	34.8595	1.29429	220.662	10.153	20.6511
LAMPUNG	KAB. LAMPUNG UTARA	SUNGKAI BARAT	Average of Province	Filling Data	Worst	1	0.983	358.901	0.1212	0.0045	0.7672	0.0353	0.0718	0.11914	0.0044235	0.754158	0.0346999	0.0705794	43.486	1.61458	275.268	12.6655	25.7615
LAMPUNG	KAB. LAMPUNG UTARA	ABUNG KUNANG	Average of Province	Filling Data	Worst	1	0.793	289.369	0.1212	0.0045	0.7672	0.0353	0.0718	0.0961116	0.0035685	0.60839	0.0279929	0.0569374	35.0807	1.3025	222.062	10.2174	20.7822
LAMPUNG	KAB. LAMPUNG UTARA	BLAMBANGAN PAGAR	Average of Province	Filling Data	Worst	1	1.574	574.591	0.1212	0.0045	0.7672	0.0353	0.0718	0.190769	0.007083	1.20757	0.0555622	0.113013	69.6306	2.5853	440.764	20.2802	41.2498
LAMPUNG	KAB. LAMPUNG BARAT	BALIK BUKIT	SIPSN	2020	Bad	2	3.343	1220.17	0.1187	0.0499	0.4699	0.096	0.2655	0.396814	0.166816	1.57088	0.320928	0.887567	144.837	60.8877	573.37	117.139	323.962
LAMPUNG	KAB. LAMPUNG BARAT	SUMBER JAYA	SIPSN	2020	Bad	2	1.886	688.473	0.1187	0.0499	0.4699	0.096	0.2655	0.223868	0.0941114	0.886231	0.181056	0.500733	81.7119	34.3507	323.474	66.0854	182.768
LAMPUNG	KAB. LAMPUNG BARAT	BELALAU	SIPSN	2020	Bad	2	0.981	358.155	0.1187	0.0499	0.4699	0.096	0.2655	0.116445	0.0489519	0.460972	0.094176	0.260456	42.5023	17.8674	168.255	34.3742	95.0663
LAMPUNG	KAB. LAMPUNG BARAT	WAY TENONG	SIPSN	2020	Bad	2	2.715	990.84	0.1187	0.0499	0.4699	0.096	0.2655	0.32227	0.135479	1.27578	0.26064	0.720832	117.629	49.4497	465.659	95.1336	263.104
LAMPUNG	KAB. LAMPUNG BARAT	SEKINCAU	SIPSN	2020	Bad	2	1.487	542.712	0.1187	0.0499	0.4699	0.096	0.2655	0.176507	0.0742013	0.698741	0.142752	0.394799	64.425	27.0835	255.041	52.1045	144.101
LAMPUNG	KAB. LAMPUNG BARAT	SUOH	SIPSN	2020	Bad	2	1.458	532.01	0.1187	0.0499	0.4699	0.096	0.2655	0.173065	0.0727542	0.685114	0.139968	0.387099	63.1686	26.5553	250.067	51.0883	141.291
LAMPUNG	KAB. LAMPUNG BARAT	BATU BRAK	SIPSN	2020	Bad	2	1.186	432.843	0.1187	0.0499	0.4699	0.096	0.2655	0.140778	0.0591814	0.557301	0.113856	0.314883	51.384	21.6012	203.415	41.5574	114.932
LAMPUNG	KAB. LAMPUNG BARAT	SUKAU	SIPSN	2020	Bad	2	1.988	725.675	0.1187	0.0499	0.4699	0.096	0.2655	0.235976	0.0992012	0.934161	0.190848	0.527814	86.1311	36.2084	340.969	69.6595	192.652
LAMPUNG	KAB. LAMPUNG BARAT	GEDUNG SURIAN	SIPSN	2020	Bad	2	1.342	489.656	0.1187	0.0499	0.4699	0.096	0.2655	0.159295	0.0669658	0.630606	0.128832	0.356301	58.1428	24.4425	230.171	47.0237	130.05
LAMPUNG	KAB. LAMPUNG BARAT	KEBUN TEBU	SIPSN	2020	Bad	2	1.652	602.855	0.1187	0.0499	0.4699	0.096	0.2655	0.196092	0.0824348	0.776275	0.158592	0.438606	71.5737	30.0887	283.34	57.8861	160.091
LAMPUNG	KAB. LAMPUNG BARAT	AIR HITAM	SIPSN	2020	Bad	2	0.972	354.911	0.1187	0.0499	0.4699	0.096	0.2655	0.115376	0.0485028	0.456743	0.093312	0.258066	42.1124	17.7035	166.711	34.0589	94.1941
LAMPUNG	KAB. LAMPUNG BARAT	PAGAR DEWA	SIPSN	2020	Bad	2	1.321	482.227	0.1187	0.0499	0.4699	0.096	0.2655	0.156803	0.0659179	0.620738	0.126816	0.350726	57.233	24.06	226.569	46.2878	128.015
LAMPUNG	KAB. LAMPUNG BARAT	BATU KETULIS	SIPSN	2020	Bad	2	1.056	385.366	0.1187	0.0499	0.4699	0.096	0.2655	0.125347	0.0526944	0.496214	0.101376	0.280368	45.7517	19.2335	181.118	37.0022	102.334
LAMPUNG	KAB. LAMPUNG BARAT	LUMBOK SEMINUNG	SIPSN	2020	Bad	2	0.659	240.63	0.1187	0.0499	0.4699	0.096	0.2655	0.0782233	0.0328841	0.309664	0.063264	0.174965	28.5515	12.0027	113.027	23.0914	63.862
LAMPUNG	KAB. LAMPUNG BARAT	BANDAR NEGERI SUOH	SIPSN	2020	Bad	2	1.986	724.736	0.1187	0.0499	0.4699	0.096	0.2655	0.235738	0.0991014	0.933221	0.190656	0.527283	86.0444	36.172	340.626	69.5894	192.458
LAMPUNG	KAB. TULANG BAWANG	MENGGALA	Average of Province	Filling Data	Worst	1	4.041	1475.13	0.0717	0.0272	0.8745	0.0152	0.0114	0.28974	0.109915	3.53385	0.0614232	0.0460674	105.755	40.119	1289.86	22.4195	16.8146
LAMPUNG	KAB. TULANG BAWANG	GEDUNG AJI	Average of Province	Filling Data	Worst	1	1.153	420.968	0.0717	0.0272	0.8745	0.0152	0.0114	0.0826701	0.0313616	1.0083	0.0175256	0.0131442	30.1746	11.447	368.029	6.39684	4.79763
LAMPUNG	KAB. TULANG BAWANG	BANJAR AGUNG	Average of Province	Filling Data	Worst	1	3.471	1266.8	0.0717	0.0272	0.8745	0.0152	0.0114	0.248871	0.0944112	3.03539	0.0527592	0.0395694	90.8378	34.4601	1107.92	19.2571	14.4428
LAMPUNG	KAB. TULANG BAWANG	GEDUNG MENENG	Average of Province	Filling Data	Worst	1	2.486	907.379	0.0717	0.0272	0.8745	0.0152	0.0114	0.178246	0.0676192	2.17401	0.0377872	0.0283404	65.0599	24.681	793.513	13.7923	10.3442
LAMPUNG	KAB. TULANG BAWANG	RAWA JITU SELATAN	Average of Province	Filling Data	Worst	1	2.476	903.632	0.0717	0.0272	0.8745	0.0152	0.0114	0.177529	0.0673472	2.16526	0.0376352	0.0282264	64.7982	24.5817	790.321	13.7368	10.3026
LAMPUNG	KAB. TULANG BAWANG	PENAWAR TAMA	Average of Province	Filling Data	Worst	1	2.527	922.28	0.0717	0.0272	0.8745	0.0152	0.0114	0.181186	0.0687344	2.20986	0.0384104	0.0288078	66.1329	25.0881	806.599	14.0198	10.5148
LAMPUNG	KAB. TULANG BAWANG	RAWA JITU TIMUR	Average of Province	Filling Data	Worst	1	1.183	431.723	0.0717	0.0272	0.8745	0.0152	0.0114	0.0848211	0.0321776	1.03453	0.0179816	0.0134862	30.9597	11.7448	377.605	6.56328	4.92246
LAMPUNG	KAB. TULANG BAWANG	BANJAR MARGO	Average of Province	Filling Data	Worst	1	3.237	1181.39	0.0717	0.0272	0.8745	0.0152	0.0114	0.232093	0.0880464	2.83076	0.0492024	0.0369018	84.7139	32.1369	1033.23	17.9589	13.4692
LAMPUNG	KAB. TULANG BAWANG	RAWA PITU	Average of Province	Filling Data	Worst	1	1.445	527.426	0.0717	0.0272	0.8745	0.0152	0.0114	0.103607	0.039304	1.26365	0.021964	0.016473	37.8164	14.346	461.233	8.01686	6.01264
LAMPUNG	KAB. TULANG BAWANG	PENAWAR AJI	Average of Province	Filling Data	Worst	1	1.662	606.74	0.0717	0.0272	0.8745	0.0152	0.0114	0.119165	0.0452064	1.45342	0.0252624	0.0189468	43.4954	16.5003	530.498	9.22078	6.91558
LAMPUNG	KAB. TULANG BAWANG	DENTE TELADAS	Average of Province	Filling Data	Worst	1	4.275	1560.43	0.0717	0.0272	0.8745	0.0152	0.0114	0.306518	0.11628	3.73849	0.06498	0.048735	111.879	42.4422	1364.55	23.7177	17.7883
LAMPUNG	KAB. TULANG BAWANG	MERAKSA AJI	Average of Province	Filling Data	Worst	1	1.251	456.607	0.0717	0.0272	0.8745	0.0152	0.0114	0.0896967	0.0340272	1.094	0.0190152	0.0142614	32.7393	12.4199	399.31	6.94055	5.20541
LAMPUNG	KAB. TULANG BAWANG	GEDUNG AJI BARU	Average of Province	Filling Data	Worst	1	1.986	724.867	0.0717	0.0272	0.8745	0.0152	0.0114	0.142396	0.0540192	1.73676	0.0301872	0.0226404	51.9746	19.717	633.916	11.0183	8.26375
LAMPUNG	KAB. TULANG BAWANG	BANJAR BARU	Average of Province	Filling Data	Worst	1	1.223	446.424	0.0717	0.0272	0.8745	0.0152	0.0114	0.0876891	0.0332656	1.06951	0.0185896	0.0139422	32.0065	12.1419	390.372	6.7852	5.0889
LAMPUNG	KAB. TULANG BAWANG	MENGGALA TIMUR	Average of Province	Filling Data	Worst	1	1.226	447.34	0.0717	0.0272	0.8745	0.0152	0.0114	0.0879042	0.0333472	1.07214	0.0186352	0.0139764	32.085	12.1717	391.33	6.80185	5.10139
LAMPUNG	KAB. TANGGAMUS	KOTA AGUNG	SIPSN	2022	Good	4	4.262	1555.7	0.189873	0.034	0.600427	0.0938	0.0819	0.809237	0.144908	2.55902	0.399776	0.349058	295.372	52.8914	934.043	145.918	127.406
LAMPUNG	KAB. TANGGAMUS	TALANG PADANG	SIPSN	2022	Good	4	4.689	1711.42	0.189873	0.034	0.600427	0.0938	0.0819	0.890313	0.159426	2.8154	0.439828	0.384029	324.964	58.1905	1027.62	160.537	140.171
LAMPUNG	KAB. TANGGAMUS	WONOSOBO	SIPSN	2022	Good	4	3.751	1369.28	0.189873	0.034	0.600427	0.0938	0.0819	0.712212	0.127534	2.2522	0.351844	0.307207	259.958	46.5499	822.054	128.423	112.131
LAMPUNG	KAB. TANGGAMUS	PULAU PANGGUNG	SIPSN	2022	Good	4	3.627	1323.74	0.189873	0.034	0.600427	0.0938	0.0819	0.688668	0.123318	2.17775	0.340213	0.297051	251.364	45.0111	794.879	124.178	108.424
LAMPUNG	KAB. TANGGAMUS	CUKUH BALAK	SIPSN	2022	Good	4	2.142	781.907	0.189873	0.034	0.600427	0.0938	0.0819	0.406707	0.072828	1.28612	0.20092	0.17543	148.448	26.5822	469.432	73.3357	64.0319
LAMPUNG	KAB. TANGGAMUS	PUGUNG	SIPSN	2022	Good	4	5.782	2110.53	0.189873	0.034	0.600427	0.0938	0.0819	1.09784	0.196588	3.47167	0.542352	0.473546	400.713	71.7546	1267.16	197.958	172.844
LAMPUNG	KAB. TANGGAMUS	SEMAKA	SIPSN	2022	Good	4	3.503	1278.67	0.189873	0.034	0.600427	0.0938	0.0819	0.665124	0.119102	2.1033	0.328581	0.286896	242.77	43.4722	767.703	119.932	104.717
LAMPUNG	KAB. TANGGAMUS	SUMBEREJO	SIPSN	2022	Good	4	3.308	1207.48	0.189873	0.034	0.600427	0.0938	0.0819	0.628099	0.112472	1.98621	0.31029	0.270925	229.256	41.0523	724.968	113.256	98.8877
LAMPUNG	KAB. TANGGAMUS	ULU BELU	SIPSN	2022	Good	4	3.89	1419.9	0.189873	0.034	0.600427	0.0938	0.0819	0.738605	0.13226	2.33566	0.364882	0.318591	269.591	48.2749	852.517	133.182	116.286
LAMPUNG	KAB. TANGGAMUS	PEMATANG SAWA	SIPSN	2022	Good	4	1.547	564.568	0.189873	0.034	0.600427	0.0938	0.0819	0.293733	0.052598	0.928861	0.145109	0.126699	107.213	19.1983	339.034	52.9646	46.2452
LAMPUNG	KAB. TANGGAMUS	KELUMBAYAN	SIPSN	2022	Good	4	1.016	370.961	0.189873	0.034	0.600427	0.0938	0.0819	0.192911	0.034544	0.610034	0.0953008	0.0832104	70.4124	12.6086	222.662	34.7848	30.3718
LAMPUNG	KAB. TANGGAMUS	KOTA AGUNG BARAT	SIPSN	2022	Good	4	2.075	757.411	0.189873	0.034	0.600427	0.0938	0.0819	0.393986	0.07055	1.24589	0.194635	0.169943	143.805	25.7508	454.749	71.0418	62.029
LAMPUNG	KAB. TANGGAMUS	KOTA AGUNG TIMUR	SIPSN	2022	Good	4	1.979	722.379	0.189873	0.034	0.600427	0.0938	0.0819	0.375758	0.067286	1.18825	0.18563	0.16208	137.152	24.5594	433.71	67.755	59.1592
LAMPUNG	KAB. TANGGAMUS	GISTING	SIPSN	2022	Good	4	3.846	1403.78	0.189873	0.034	0.600427	0.0938	0.0819	0.73025	0.130764	2.30924	0.360755	0.314987	266.541	47.7289	842.874	131.676	114.97
LAMPUNG	KAB. TANGGAMUS	GUNUNG ALIP	SIPSN	2022	Good	4	1.957	714.136	0.189873	0.034	0.600427	0.0938	0.0819	0.371581	0.066538	1.17504	0.183567	0.160278	135.627	24.2864	428.888	67.0018	58.5016
LAMPUNG	KAB. TANGGAMUS	LIMAU	SIPSN	2022	Good	4	1.862	679.569	0.189873	0.034	0.600427	0.0938	0.0819	0.353543	0.063308	1.118	0.174656	0.152498	129.043	23.1074	408.068	63.7493	55.6617
LAMPUNG	KAB. TANGGAMUS	BANDAR NEGERI SEMUONG	SIPSN	2022	Good	4	1.473	537.58	0.189873	0.034	0.600427	0.0938	0.0819	0.279682	0.050082	0.884429	0.138167	0.120639	102.084	18.2799	322.817	50.4311	44.0331
LAMPUNG	KAB. TANGGAMUS	AIR NANINGAN	SIPSN	2022	Good	4	2.802	1022.74	0.189873	0.034	0.600427	0.0938	0.0819	0.532023	0.095268	1.6824	0.262828	0.229484	194.189	34.7728	614.075	95.9321	83.7616
LAMPUNG	KAB. TANGGAMUS	BULOK	SIPSN	2022	Good	4	2.206	805.04	0.189873	0.034	0.600427	0.0938	0.0819	0.418859	0.075004	1.32454	0.206923	0.180671	152.884	27.3765	483.458	75.5268	65.9451
LAMPUNG	KAB. TANGGAMUS	KELUMBAYAN BARAT	SIPSN	2022	Good	4	1.28	467.216	0.189873	0.034	0.600427	0.0938	0.0819	0.243037	0.04352	0.768547	0.120064	0.104832	88.7085	15.8848	280.52	43.8234	38.2637
LAMPUNG	KAB. LAMPUNG TIMUR	SUKADANA	Average of Province	Filling Data	Worst	1	5.969	2178.75	0.0371	0.0184	0.9222	0.0087	0.0136	0.22145	0.10983	5.50461	0.0519303	0.0811784	80.8292	40.0878	2009.18	18.9546	29.6301
LAMPUNG	KAB. LAMPUNG TIMUR	LABUHAN MARINGGAI	Average of Province	Filling Data	Worst	1	6.056	2210.44	0.0371	0.0184	0.9222	0.0087	0.0136	0.224678	0.11143	5.58484	0.0526872	0.0823616	82.0073	40.6721	2038.47	19.2308	30.062
LAMPUNG	KAB. LAMPUNG TIMUR	JABUNG	Average of Province	Filling Data	Worst	1	4.272	1559.25	0.0371	0.0184	0.9222	0.0087	0.0136	0.158491	0.0786048	3.93964	0.0371664	0.0580992	57.8493	28.6908	1437.97	13.5657	21.2062
LAMPUNG	KAB. LAMPUNG TIMUR	PEKALONGAN	Average of Province	Filling Data	Worst	1	4.17	1522.1	0.0371	0.0184	0.9222	0.0087	0.0136	0.154707	0.076728	3.84557	0.036279	0.056712	56.4681	28.0057	1403.63	13.2418	20.6999
LAMPUNG	KAB. LAMPUNG TIMUR	SEKAMPUNG	Average of Province	Filling Data	Worst	1	5.263	1921.16	0.0371	0.0184	0.9222	0.0087	0.0136	0.195257	0.0968392	4.85354	0.0457881	0.0715768	71.2689	35.3463	1771.54	16.7127	26.1255
LAMPUNG	KAB. LAMPUNG TIMUR	BATANGHARI	Average of Province	Filling Data	Worst	1	4.683	1709.19	0.0371	0.0184	0.9222	0.0087	0.0136	0.173739	0.0861672	4.31866	0.0407421	0.0636888	63.4148	31.451	1576.31	14.8709	23.2464
LAMPUNG	KAB. LAMPUNG TIMUR	WAY JEPARA	Average of Province	Filling Data	Worst	1	4.556	1662.94	0.0371	0.0184	0.9222	0.0087	0.0136	0.169028	0.0838304	4.20154	0.0396372	0.0619616	61.6951	30.5981	1533.56	14.4676	22.616
LAMPUNG	KAB. LAMPUNG TIMUR	PURBOLINGGO	Average of Province	Filling Data	Worst	1	3.597	1312.99	0.0371	0.0184	0.9222	0.0087	0.0136	0.133449	0.0661848	3.31715	0.0312939	0.0489192	48.7088	24.1575	1210.76	11.4223	17.8555
LAMPUNG	KAB. LAMPUNG TIMUR	RAMAN UTARA	Average of Province	Filling Data	Worst	1	3.214	1173.15	0.0371	0.0184	0.9222	0.0087	0.0136	0.119239	0.0591376	2.96395	0.0279618	0.0437104	43.5224	21.5852	1081.84	10.2061	15.9543
LAMPUNG	KAB. LAMPUNG TIMUR	METRO KIBANG	Average of Province	Filling Data	Worst	1	1.907	696.237	0.0371	0.0184	0.9222	0.0087	0.0136	0.0707497	0.0350888	1.75864	0.0165909	0.0259352	25.8236	12.8074	641.902	6.05568	9.46635
LAMPUNG	KAB. LAMPUNG TIMUR	MARGA TIGA	Average of Province	Filling Data	Worst	1	3.887	1418.85	0.0371	0.0184	0.9222	0.0087	0.0136	0.144208	0.0715208	3.58459	0.0338169	0.0528632	52.6358	26.1051	1308.38	12.3432	19.2951
LAMPUNG	KAB. LAMPUNG TIMUR	SEKAMPUNG UDIK	Average of Province	Filling Data	Worst	1	6.024	2198.77	0.0371	0.0184	0.9222	0.0087	0.0136	0.22349	0.110842	5.55533	0.0524088	0.0819264	81.574	40.4572	2027.7	19.1292	29.9031
LAMPUNG	KAB. LAMPUNG TIMUR	BATANGHARI NUBAN	Average of Province	Filling Data	Worst	1	3.734	1363.01	0.0371	0.0184	0.9222	0.0087	0.0136	0.138531	0.0687056	3.44349	0.0324858	0.0507824	50.564	25.0775	1256.88	11.8573	18.5356
LAMPUNG	KAB. LAMPUNG TIMUR	BUMI AGUNG	Average of Province	Filling Data	Worst	1	1.597	582.857	0.0371	0.0184	0.9222	0.0087	0.0136	0.0592487	0.0293848	1.47275	0.0138939	0.0217192	21.6258	10.7255	537.555	5.07127	7.92751
LAMPUNG	KAB. LAMPUNG TIMUR	BANDAR SRIBHAWONO	Average of Province	Filling Data	Worst	1	4.134	1508.86	0.0371	0.0184	0.9222	0.0087	0.0136	0.153371	0.0760656	3.81237	0.0359658	0.0562224	55.9806	27.7639	1391.52	13.1275	20.5212
LAMPUNG	KAB. LAMPUNG TIMUR	MATARAM BARU	Average of Province	Filling Data	Worst	1	2.387	871.111	0.0371	0.0184	0.9222	0.0087	0.0136	0.0885577	0.0439208	2.20129	0.0207669	0.0324632	32.3236	16.0311	803.471	7.57992	11.8491
LAMPUNG	KAB. LAMPUNG TIMUR	MELINTING	Average of Province	Filling Data	Worst	1	2.242	818.426	0.0371	0.0184	0.9222	0.0087	0.0136	0.0831782	0.0412528	2.06757	0.0195054	0.0304912	30.36	15.0573	754.664	7.11947	11.1293
LAMPUNG	KAB. LAMPUNG TIMUR	GUNUNG PELINDUNG	Average of Province	Filling Data	Worst	1	1.867	681.564	0.0371	0.0184	0.9222	0.0087	0.0136	0.0692657	0.0343528	1.72175	0.0162429	0.0253912	25.282	12.5388	628.438	5.92866	9.26779
LAMPUNG	KAB. LAMPUNG TIMUR	PASIR SAKTI	Average of Province	Filling Data	Worst	1	3.271	1194.09	0.0371	0.0184	0.9222	0.0087	0.0136	0.121354	0.0601864	3.01652	0.0284577	0.0444856	44.2942	21.968	1101.03	10.3871	16.2372
LAMPUNG	KAB. LAMPUNG TIMUR	WAWAY KARYA	Average of Province	Filling Data	Worst	1	3.354	1224.12	0.0371	0.0184	0.9222	0.0087	0.0136	0.124433	0.0617136	3.09306	0.0291798	0.0456144	45.4182	22.5255	1128.97	10.6506	16.6493
LAMPUNG	KAB. LAMPUNG TIMUR	LABUHAN RATU	Average of Province	Filling Data	Worst	1	3.916	1429.31	0.0371	0.0184	0.9222	0.0087	0.0136	0.145284	0.0720544	3.61134	0.0340692	0.0532576	53.0285	26.2999	1318.14	12.4353	19.439
LAMPUNG	KAB. LAMPUNG TIMUR	BRAJA SELEBAH	Average of Province	Filling Data	Worst	1	2.016	735.765	0.0371	0.0184	0.9222	0.0087	0.0136	0.0747936	0.0370944	1.85916	0.0175392	0.0274176	27.2997	13.5395	678.592	6.40181	10.0074
LAMPUNG	KAB. LAMPUNG TIMUR	WAY BUNGUR	Average of Province	Filling Data	Worst	1	2.079	758.876	0.0371	0.0184	0.9222	0.0087	0.0136	0.0771309	0.0382536	1.91725	0.0180873	0.0282744	28.1528	13.9626	699.798	6.60186	10.3202
LAMPUNG	KAB. LAMPUNG TIMUR	MARGA SEKAMPUNG	Average of Province	Filling Data	Worst	1	2.327	849.488	0.0371	0.0184	0.9222	0.0087	0.0136	0.0863317	0.0428168	2.14596	0.0202449	0.0316472	31.5111	15.6281	783.275	7.38939	11.5512
LAMPUNG	KAB. WAY KANAN	BLAMBANGAN UMPU	SIPSN	2022	Good	4	2.912	1063.02	0.0897269	0.0158	0.786573	0.0334	0.0745	0.261285	0.0460096	2.2905	0.0972608	0.216944	95.3689	16.7935	836.033	35.5002	79.1846
LAMPUNG	KAB. WAY KANAN	KASUI	SIPSN	2022	Good	4	2.6	948.914	0.0897269	0.0158	0.786573	0.0334	0.0745	0.23329	0.04108	2.04509	0.08684	0.1937	85.1508	14.9942	746.458	31.6966	70.7005
LAMPUNG	KAB. WAY KANAN	BANJIT	SIPSN	2022	Good	4	3.699	1350.11	0.0897269	0.0158	0.786573	0.0334	0.0745	0.3319	0.0584442	2.90953	0.123547	0.275575	121.143	21.3321	1061.98	45.0945	100.585
LAMPUNG	KAB. WAY KANAN	BARADATU	SIPSN	2022	Good	4	3.499	1277.21	0.0897269	0.0158	0.786573	0.0334	0.0745	0.313954	0.0552842	2.75222	0.116867	0.260676	114.593	20.1787	1004.56	42.6563	95.1466
LAMPUNG	KAB. WAY KANAN	BAHUGA	SIPSN	2022	Good	4	0.949	346.371	0.0897269	0.0158	0.786573	0.0334	0.0745	0.0851508	0.0149942	0.746458	0.0316966	0.0707005	31.08	5.47288	272.457	11.5693	25.8057
LAMPUNG	KAB. WAY KANAN	PAKUAN RATU	SIPSN	2022	Good	4	3.543	1293.29	0.0897269	0.0158	0.786573	0.0334	0.0745	0.317902	0.0559794	2.78683	0.118336	0.263954	116.034	20.4325	1017.19	43.1927	96.343
LAMPUNG	KAB. WAY KANAN	NEGERI AGUNG	SIPSN	2022	Good	4	2.969	1083.6	0.0897269	0.0158	0.786573	0.0334	0.0745	0.266399	0.0469102	2.33534	0.0991646	0.22119	97.2357	17.1222	852.398	36.1951	80.7345
LAMPUNG	KAB. WAY KANAN	WAY TUBA	SIPSN	2022	Good	4	2.065	753.769	0.0897269	0.0158	0.786573	0.0334	0.0745	0.185286	0.032627	1.62427	0.068971	0.153842	67.6294	11.9089	592.86	25.1744	56.1525
LAMPUNG	KAB. WAY KANAN	REBANG TANGKAS	SIPSN	2022	Good	4	1.863	680.048	0.0897269	0.0158	0.786573	0.0334	0.0745	0.167161	0.0294354	1.46539	0.0622242	0.138793	61.0138	10.7439	534.866	22.7118	50.6596
LAMPUNG	KAB. WAY KANAN	GUNUNG LABUHAN	SIPSN	2022	Good	4	2.443	891.816	0.0897269	0.0158	0.786573	0.0334	0.0745	0.219203	0.0385994	1.9216	0.0815962	0.182003	80.009	14.0888	701.383	29.7826	66.4313
LAMPUNG	KAB. WAY KANAN	NEGARA BATIN	SIPSN	2022	Good	4	2.949	1076.49	0.0897269	0.0158	0.786573	0.0334	0.0745	0.264605	0.0465942	2.3196	0.0984966	0.2197	96.5807	17.0069	846.656	35.9513	80.1907
LAMPUNG	KAB. WAY KANAN	NEGERI BESAR	SIPSN	2022	Good	4	1.657	604.649	0.0897269	0.0158	0.786573	0.0334	0.0745	0.148677	0.0261806	1.30335	0.0553438	0.123447	54.2673	9.55592	475.723	20.2005	45.058
LAMPUNG	KAB. WAY KANAN	BUAY BAHUGA	SIPSN	2022	Good	4	1.704	622.125	0.0897269	0.0158	0.786573	0.0334	0.0745	0.152895	0.0269232	1.34032	0.0569136	0.126948	55.8065	9.82697	489.217	20.7735	46.336
LAMPUNG	KAB. WAY KANAN	BUMI AGUNG	SIPSN	2022	Good	4	2.273	829.766	0.0897269	0.0158	0.786573	0.0334	0.0745	0.203949	0.0359134	1.78788	0.0759182	0.169339	74.4414	13.1084	652.576	27.7101	61.8086
LAMPUNG	KAB. WAY KANAN	UMPU SEMENGUK	SIPSN	2022	Good	4	2.608	951.817	0.0897269	0.0158	0.786573	0.0334	0.0745	0.234008	0.0412064	2.05138	0.0871072	0.194296	85.4128	15.0403	748.755	31.7941	70.918
LAMPUNG	KAB. PESAWARAN	GEDONG TATAAN	SIPSN	2020	Bad	2	7.87	2872.5	0.0984	0.0278	0.7607	0.0765	0.0366	0.774408	0.218786	5.98671	0.602055	0.288042	282.659	79.8569	2185.15	219.75	105.135
LAMPUNG	KAB. PESAWARAN	NEGERI KATON	SIPSN	2020	Bad	2	5.437	1984.55	0.0984	0.0278	0.7607	0.0765	0.0366	0.535001	0.151149	4.13593	0.415931	0.198994	195.275	55.1692	1509.61	151.815	72.6329
LAMPUNG	KAB. PESAWARAN	TEGINENENG	SIPSN	2020	Bad	2	4.383	1599.77	0.0984	0.0278	0.7607	0.0765	0.0366	0.431287	0.121847	3.33415	0.335299	0.160418	157.42	44.4743	1216.96	122.384	58.5525
LAMPUNG	KAB. PESAWARAN	WAY LIMA	SIPSN	2020	Bad	2	2.846	1038.83	0.0984	0.0278	0.7607	0.0765	0.0366	0.280046	0.0791188	2.16495	0.217719	0.104164	102.217	28.8784	790.208	79.4674	38.0197
LAMPUNG	KAB. PESAWARAN	PADANG CERMIN	SIPSN	2020	Bad	2	2.155	786.445	0.0984	0.0278	0.7607	0.0765	0.0366	0.212052	0.059909	1.63931	0.164857	0.078873	77.399	21.8668	598.348	60.173	28.7886
LAMPUNG	KAB. PESAWARAN	PUNDUH PIDADA	SIPSN	2020	Bad	2	1.153	420.751	0.0984	0.0278	0.7607	0.0765	0.0366	0.113455	0.0320534	0.877087	0.0882045	0.0421998	41.4111	11.6995	320.137	32.1946	15.4029
LAMPUNG	KAB. PESAWARAN	KEDONDONG	SIPSN	2020	Bad	2	2.884	1052.72	0.0984	0.0278	0.7607	0.0765	0.0366	0.283786	0.0801752	2.19386	0.220626	0.105554	103.582	29.2639	800.758	80.5285	38.5274
LAMPUNG	KAB. PESAWARAN	MARGA PUNDUH	SIPSN	2020	Bad	2	1.156	421.834	0.0984	0.0278	0.7607	0.0765	0.0366	0.11375	0.0321368	0.879369	0.088434	0.0423096	41.5189	11.7299	320.97	32.2784	15.443
LAMPUNG	KAB. PESAWARAN	WAY KHILAU	SIPSN	2020	Bad	2	2.338	853.277	0.0984	0.0278	0.7607	0.0765	0.0366	0.230059	0.0649964	1.77852	0.178857	0.0855708	83.9716	23.7237	649.159	65.2828	31.2333
LAMPUNG	KAB. PESAWARAN	TELUK PANDAN	SIPSN	2020	Bad	2	2.825	1031.01	0.0984	0.0278	0.7607	0.0765	0.0366	0.27798	0.078535	2.14898	0.216113	0.103395	101.463	28.6653	784.377	78.8811	37.7392
LAMPUNG	KAB. PESAWARAN	WAY RATAI	SIPSN	2020	Bad	2	2.668	973.813	0.0984	0.0278	0.7607	0.0765	0.0366	0.262531	0.0741704	2.02955	0.204102	0.0976488	95.8239	27.0722	740.785	74.4972	35.6418
LAMPUNG	KAB. PRINGSEWU	PRINGSEWU	SIPSN	2022	Good	4	6.872	2508.19	0.0642	0.0186	0.8449	0.0036	0.0687	0.441182	0.127819	5.80615	0.0247392	0.472106	161.032	46.654	2119.25	9.02981	172.319
LAMPUNG	KAB. PRINGSEWU	GADING REJO	SIPSN	2022	Good	4	6.611	2413.06	0.0642	0.0186	0.8449	0.0036	0.0687	0.424426	0.122965	5.58563	0.0237996	0.454176	154.916	44.8821	2038.76	8.68685	165.774
LAMPUNG	KAB. PRINGSEWU	AMBARAWA	SIPSN	2022	Good	4	3.124	1140.35	0.0642	0.0186	0.8449	0.0036	0.0687	0.200561	0.0581064	2.63947	0.0112464	0.214619	73.2047	21.2088	963.406	4.10494	78.3359
LAMPUNG	KAB. PRINGSEWU	PARDASUKA	SIPSN	2022	Good	4	2.993	1092.37	0.0642	0.0186	0.8449	0.0036	0.0687	0.192151	0.0556698	2.52879	0.0107748	0.205619	70.135	20.3195	923.007	3.9328	75.051
LAMPUNG	KAB. PRINGSEWU	PAGELARAN	SIPSN	2022	Good	4	4.417	1612.04	0.0642	0.0186	0.8449	0.0036	0.0687	0.283571	0.0821562	3.73192	0.0159012	0.303448	103.504	29.987	1362.15	5.80394	110.758
LAMPUNG	KAB. PRINGSEWU	BANYUMAS	SIPSN	2022	Good	4	1.828	667.278	0.0642	0.0186	0.8449	0.0036	0.0687	0.117358	0.0340008	1.54448	0.0065808	0.125584	42.8355	12.4103	563.734	2.40199	45.838
LAMPUNG	KAB. PRINGSEWU	ADILUWIH	SIPSN	2022	Good	4	3.048	1112.46	0.0642	0.0186	0.8449	0.0036	0.0687	0.195682	0.0566928	2.57526	0.0109728	0.209398	71.4238	20.6929	939.968	4.00507	76.4301
LAMPUNG	KAB. PRINGSEWU	SUKOHARJO	SIPSN	2022	Good	4	4.228	1543.07	0.0642	0.0186	0.8449	0.0036	0.0687	0.271438	0.0786408	3.57224	0.0152208	0.290464	99.0747	28.7039	1303.87	5.55559	106.019
LAMPUNG	KAB. PRINGSEWU	PAGELARAN UTARA	SIPSN	2022	Good	4	1.305	476.281	0.0642	0.0186	0.8449	0.0036	0.0687	0.083781	0.024273	1.10259	0.004698	0.0896535	30.5801	8.85965	402.447	1.71477	32.7235
LAMPUNG	KAB. MESUJI	MESUJI	Average of Province	Filling Data	Worst	1	0.793	289.576	0.0172	0.0391	0.8292	0.0753	0.0392	0.0136396	0.0310063	0.657556	0.0597129	0.0310856	4.97845	11.3173	240.008	21.7952	11.3462
LAMPUNG	KAB. MESUJI	MESUJI TIMUR	Average of Province	Filling Data	Worst	1	1.231	449.417	0.0172	0.0391	0.8292	0.0753	0.0392	0.0211732	0.0481321	1.02075	0.0926943	0.0482552	7.72822	17.5682	372.572	33.8334	17.6131
LAMPUNG	KAB. MESUJI	RAWA JITU UTARA	Average of Province	Filling Data	Worst	1	0.875	319.325	0.0172	0.0391	0.8292	0.0753	0.0392	0.01505	0.0342125	0.72555	0.0658875	0.0343	5.49325	12.4876	264.826	24.0489	12.5195
LAMPUNG	KAB. MESUJI	WAY SERDANG	Average of Province	Filling Data	Worst	1	1.615	589.449	0.0172	0.0391	0.8292	0.0753	0.0392	0.027778	0.0631465	1.33916	0.12161	0.063308	10.139	23.0485	488.793	44.3875	23.1074
LAMPUNG	KAB. MESUJI	SIMPANG PEMATANG	Average of Province	Filling Data	Worst	1	1.074	392.045	0.0172	0.0391	0.8292	0.0753	0.0392	0.0184728	0.0419934	0.890561	0.0808722	0.0421008	6.74257	15.3276	325.055	29.5184	15.3668
LAMPUNG	KAB. MESUJI	PANCA JAYA	Average of Province	Filling Data	Worst	1	0.665	242.563	0.0172	0.0391	0.8292	0.0753	0.0392	0.011438	0.0260015	0.551418	0.0500745	0.026068	4.17487	9.49055	201.268	18.2772	9.51482
LAMPUNG	KAB. MESUJI	TANJUNG RAYA	Average of Province	Filling Data	Worst	1	1.568	572.308	0.0172	0.0391	0.8292	0.0753	0.0392	0.0269696	0.0613088	1.30019	0.11807	0.0614656	9.8439	22.3777	474.568	43.0957	22.4349
LAMPUNG	KAB. TULANG BAWANG BARAT	TULANG BAWANG TENGAH	SIPSN	2022	Good	4	6.917	2524.53	0.0149	0	0.9771	0.0023	0.0057	0.103063	0	6.7586	0.0159091	0.0394269	37.6181	0	2466.89	5.80682	14.3908
LAMPUNG	KAB. TULANG BAWANG BARAT	TUMIJAJAR	SIPSN	2022	Good	4	3.595	1312.32	0.0149	0	0.9771	0.0023	0.0057	0.0535655	0	3.51267	0.0082685	0.0204915	19.5514	0	1282.13	3.018	7.4794
LAMPUNG	KAB. TULANG BAWANG BARAT	TULANG BAWANG UDIK	SIPSN	2022	Good	4	2.657	969.784	0.0149	0	0.9771	0.0023	0.0057	0.0395893	0	2.59615	0.0061111	0.0151449	14.4501	0	947.596	2.23055	5.52789
LAMPUNG	KAB. TULANG BAWANG BARAT	GUNUNG TERANG	SIPSN	2022	Good	4	1.544	563.548	0.0149	0	0.9771	0.0023	0.0057	0.0230056	0	1.50864	0.0035512	0.0088008	8.39704	0	550.654	1.29619	3.21229
LAMPUNG	KAB. TULANG BAWANG BARAT	GUNUNG AGUNG	SIPSN	2022	Good	4	2.659	970.506	0.0149	0	0.9771	0.0023	0.0057	0.0396191	0	2.59811	0.0061157	0.0151563	14.461	0	948.31	2.23223	5.53205
LAMPUNG	KAB. TULANG BAWANG BARAT	WAY KENANGA	SIPSN	2022	Good	4	1.873	683.539	0.0149	0	0.9771	0.0023	0.0057	0.0279077	0	1.83011	0.0043079	0.0106761	10.1863	0	667.99	1.57238	3.89678
LAMPUNG	KAB. TULANG BAWANG BARAT	LAMBU KIBANG	SIPSN	2022	Good	4	1.861	679.207	0.0149	0	0.9771	0.0023	0.0057	0.0277289	0	1.81838	0.0042803	0.0106077	10.121	0	663.71	1.56231	3.87181
LAMPUNG	KAB. TULANG BAWANG BARAT	PAGAR DEWA	SIPSN	2022	Good	4	0.573	209.158	0.0149	0	0.9771	0.0023	0.0057	0.0085377	0	0.559878	0.0013179	0.0032661	3.11626	0	204.356	0.481033	1.19213
LAMPUNG	KAB. TULANG BAWANG BARAT	BATU PUTIH	SIPSN	2022	Good	4	1.341	489.515	0.0149	0	0.9771	0.0023	0.0057	0.0199809	0	1.31029	0.0030843	0.0076437	7.29303	0	478.256	1.12577	2.78995
LAMPUNG	KAB. PESISIR BARAT	PESISIR TENGAH	Average of Province	Filling Data	Worst	1	1.603	584.917	0.0779	0.0281	0.7456	0.0893	0.0591	0.124874	0.0450443	1.1952	0.143148	0.0947373	45.5789	16.4412	436.247	52.249	34.5791
LAMPUNG	KAB. PESISIR BARAT	PESISIR SELATAN	Average of Province	Filling Data	Worst	1	2.206	805.24	0.0779	0.0281	0.7456	0.0893	0.0591	0.171847	0.0619886	1.64479	0.196996	0.130375	62.7243	22.6258	600.35	71.9035	47.5867
LAMPUNG	KAB. PESISIR BARAT	LEMONG	Average of Province	Filling Data	Worst	1	1.026	374.432	0.0779	0.0281	0.7456	0.0893	0.0591	0.0799254	0.0288306	0.764986	0.0916218	0.0606366	29.1728	10.5232	279.22	33.442	22.1324
LAMPUNG	KAB. PESISIR BARAT	PESISIR UTARA	Average of Province	Filling Data	Worst	1	0.686	250.327	0.0779	0.0281	0.7456	0.0893	0.0591	0.0534394	0.0192766	0.511482	0.0612598	0.0405426	19.5054	7.03596	186.691	22.3598	14.798
LAMPUNG	KAB. PESISIR BARAT	KARYA PENGGAWA	Average of Province	Filling Data	Worst	1	1.257	458.637	0.0779	0.0281	0.7456	0.0893	0.0591	0.0979203	0.0353217	0.937219	0.11225	0.0742887	35.7409	12.8924	342.085	40.9713	27.1154
LAMPUNG	KAB. PESISIR BARAT	PULAU PISANG	Average of Province	Filling Data	Worst	1	0.132	48.223	0.0779	0.0281	0.7456	0.0893	0.0591	0.0102828	0.0037092	0.0984192	0.0117876	0.0078012	3.75322	1.35386	35.923	4.30247	2.84744
LAMPUNG	KAB. PESISIR BARAT	WAY KRUI	Average of Province	Filling Data	Worst	1	0.725	264.514	0.0779	0.0281	0.7456	0.0893	0.0591	0.0564775	0.0203725	0.54056	0.0647425	0.0428475	20.6143	7.43596	197.304	23.631	15.6393
LAMPUNG	KAB. PESISIR BARAT	KRUI SELATAN	Average of Province	Filling Data	Worst	1	0.88	321.204	0.0779	0.0281	0.7456	0.0893	0.0591	0.068552	0.024728	0.656128	0.078584	0.052008	25.0215	9.02572	239.487	28.6832	18.9829
LAMPUNG	KAB. PESISIR BARAT	NGAMBUR	Average of Province	Filling Data	Worst	1	1.798	656.422	0.0779	0.0281	0.7456	0.0893	0.0591	0.140064	0.0505238	1.34059	0.160561	0.106262	51.1234	18.4412	489.315	58.6049	38.7856
LAMPUNG	KAB. PESISIR BARAT	NGARAS	Average of Province	Filling Data	Worst	1	0.799	291.572	0.0779	0.0281	0.7456	0.0893	0.0591	0.0622421	0.0224519	0.595734	0.0713507	0.0472209	22.7184	8.19494	217.443	26.043	17.2356
LAMPUNG	KAB. PESISIR BARAT	BANGKUNAT	Average of Province	Filling Data	Worst	1	2.206	805.326	0.0779	0.0281	0.7456	0.0893	0.0591	0.171847	0.0619886	1.64479	0.196996	0.130375	62.7243	22.6258	600.35	71.9035	47.5867
LAMPUNG	KOTA BANDAR LAMPUNG	KEDATON	SIPSN	2022	Good	4	5.478	1999.61	0.829214	0.0028	0.098386	0.0571	0.0125	4.54243	0.0153384	0.538959	0.312794	0.068475	1657.99	5.59852	196.72	114.17	24.9934
LAMPUNG	KOTA BANDAR LAMPUNG	SUKARAME	SIPSN	2022	Good	4	6.964	2541.78	0.829214	0.0028	0.098386	0.0571	0.0125	5.77465	0.0194992	0.68516	0.397644	0.08705	2107.75	7.11721	250.084	145.14	31.7733
LAMPUNG	KOTA BANDAR LAMPUNG	TANJUNGKARANG BARAT	SIPSN	2022	Good	4	6.551	2390.96	0.829214	0.0028	0.098386	0.0571	0.0125	5.43218	0.0183428	0.644527	0.374062	0.0818875	1982.75	6.69512	235.252	136.533	29.8889
LAMPUNG	KOTA BANDAR LAMPUNG	PANJANG	SIPSN	2022	Good	4	7.797	2846.02	0.829214	0.0028	0.098386	0.0571	0.0125	6.46538	0.0218316	0.767116	0.445209	0.0974625	2359.86	7.96853	279.997	162.501	35.5738
LAMPUNG	KOTA BANDAR LAMPUNG	TANJUNGKARANG TIMUR	SIPSN	2022	Good	4	4.039	1474.13	0.829214	0.0028	0.098386	0.0571	0.0125	3.3492	0.0113092	0.397381	0.230627	0.0504875	1222.46	4.12786	145.044	84.1788	18.4279
LAMPUNG	KOTA BANDAR LAMPUNG	TANJUNGKARANG PUSAT	SIPSN	2022	Good	4	5.292	1931.44	0.829214	0.0028	0.098386	0.0571	0.0125	4.3882	0.0148176	0.520659	0.302173	0.06615	1601.69	5.40842	190.041	110.293	24.1448
LAMPUNG	KOTA BANDAR LAMPUNG	TELUKBETUNG SELATAN	SIPSN	2022	Good	4	4.12	1503.66	0.829214	0.0028	0.098386	0.0571	0.0125	3.41636	0.011536	0.40535	0.235252	0.0515	1246.97	4.21064	147.953	85.867	18.7975
LAMPUNG	KOTA BANDAR LAMPUNG	TELUKBETUNG BARAT	SIPSN	2022	Good	4	3.974	1450.47	0.829214	0.0028	0.098386	0.0571	0.0125	3.2953	0.0111272	0.390986	0.226915	0.049675	1202.78	4.06143	142.71	82.8241	18.1314
LAMPUNG	KOTA BANDAR LAMPUNG	TELUKBETUNG UTARA	SIPSN	2022	Good	4	5.273	1924.51	0.829214	0.0028	0.098386	0.0571	0.0125	4.37245	0.0147644	0.51879	0.301088	0.0659125	1595.94	5.38901	189.358	109.897	24.0581
LAMPUNG	KOTA BANDAR LAMPUNG	RAJABASA	SIPSN	2022	Good	4	5.743	2096.02	0.829214	0.0028	0.098386	0.0571	0.0125	4.76218	0.0160804	0.565031	0.327925	0.0717875	1738.19	5.86935	206.236	119.693	26.2024
LAMPUNG	KOTA BANDAR LAMPUNG	TANJUNG SENANG	SIPSN	2022	Good	4	6.409	2339.33	0.829214	0.0028	0.098386	0.0571	0.0125	5.31443	0.0179452	0.630556	0.365954	0.0801125	1939.77	6.55	230.153	133.573	29.2411
LAMPUNG	KOTA BANDAR LAMPUNG	SUKABUMI	SIPSN	2022	Good	4	7.537	2750.87	0.829214	0.0028	0.098386	0.0571	0.0125	6.24979	0.0211036	0.741536	0.430363	0.0942125	2281.17	7.70281	270.66	157.082	34.3876
LAMPUNG	KOTA BANDAR LAMPUNG	KEMILING	SIPSN	2022	Good	4	8.865	3235.62	0.829214	0.0028	0.098386	0.0571	0.0125	7.35098	0.024822	0.872192	0.506192	0.110813	2683.11	9.06003	318.35	184.76	40.4466
LAMPUNG	KOTA BANDAR LAMPUNG	LABUHAN RATU	SIPSN	2022	Good	4	5.002	1825.81	0.829214	0.0028	0.098386	0.0571	0.0125	4.14773	0.0140056	0.492127	0.285614	0.062525	1513.92	5.11204	179.626	104.249	22.8216
LAMPUNG	KOTA BANDAR LAMPUNG	WAY HALIM	SIPSN	2022	Good	4	7.098	2590.68	0.829214	0.0028	0.098386	0.0571	0.0125	5.88576	0.0198744	0.698344	0.405296	0.088725	2148.3	7.25416	254.896	147.933	32.3846
LAMPUNG	KOTA BANDAR LAMPUNG	LANGKAPURA	SIPSN	2022	Good	4	4.437	1619.62	0.829214	0.0028	0.098386	0.0571	0.0125	3.67922	0.0124236	0.436539	0.253353	0.0554625	1342.92	4.53461	159.337	92.4737	20.2438
LAMPUNG	KOTA BANDAR LAMPUNG	ENGGAL	SIPSN	2022	Good	4	2.696	984.202	0.829214	0.0028	0.098386	0.0571	0.0125	2.23556	0.0075488	0.265249	0.153942	0.0337	815.98	2.75531	96.8158	56.1887	12.3005
LAMPUNG	KOTA BANDAR LAMPUNG	KEDAMAIAN	SIPSN	2022	Good	4	5.554	2027.39	0.829214	0.0028	0.098386	0.0571	0.0125	4.60545	0.0155512	0.546436	0.317133	0.069425	1680.99	5.67619	199.449	115.754	25.3401
LAMPUNG	KOTA BANDAR LAMPUNG	TELUKBETUNG TIMUR	SIPSN	2022	Good	4	5.184	1892.31	0.829214	0.0028	0.098386	0.0571	0.0125	4.29865	0.0145152	0.510033	0.296006	0.0648	1569.01	5.29805	186.162	108.042	23.652
LAMPUNG	KOTA BANDAR LAMPUNG	BUMI WARAS	SIPSN	2022	Good	4	6.092	2223.45	0.829214	0.0028	0.098386	0.0571	0.0125	5.05157	0.0170576	0.599368	0.347853	0.07615	1843.82	6.22602	218.769	126.966	27.7947
LAMPUNG	KOTA METRO	METRO PUSAT	SIPSN	2022	Good	4	6.347	2316.54	0.4996	0.0036	0.4918	0.0009	0.0041	3.17096	0.0228492	3.12145	0.0057123	0.0260227	1157.4	8.33996	1139.33	2.08499	9.49829
LAMPUNG	KOTA METRO	METRO UTARA	SIPSN	2022	Good	4	3.853	1406.27	0.4996	0.0036	0.4918	0.0009	0.0041	1.92496	0.0138708	1.89491	0.0034677	0.0157973	702.61	5.06284	691.64	1.26571	5.76601
LAMPUNG	KOTA METRO	METRO BARAT	SIPSN	2022	Good	4	3.3	1204.53	0.4996	0.0036	0.4918	0.0009	0.0041	1.64868	0.01188	1.62294	0.00297	0.01353	601.768	4.3362	592.373	1.08405	4.93845
LAMPUNG	KOTA METRO	METRO TIMUR	SIPSN	2022	Good	4	4.665	1702.64	0.4996	0.0036	0.4918	0.0009	0.0041	2.33063	0.016794	2.29425	0.0041985	0.0191265	850.681	6.12981	837.4	1.53245	6.98117
LAMPUNG	KOTA METRO	METRO SELATAN	SIPSN	2022	Good	4	2.082	759.824	0.4996	0.0036	0.4918	0.0009	0.0041	1.04017	0.0074952	1.02393	0.0018738	0.0085362	379.661	2.73575	373.734	0.683937	3.11571
KEPULAUAN BANGKA BELITUNG	KAB. BANGKA	SUNGAILIAT	SIPSN	2022	Good	4	7.166	2615.58	0.2962	0.0356	0.4428	0.0199	0.2055	2.12257	0.25511	3.1731	0.142603	1.47261	774.738	93.115	1158.18	52.0502	537.504
KEPULAUAN BANGKA BELITUNG	KAB. BANGKA	BELINYU	SIPSN	2022	Good	4	3.821	1394.71	0.2962	0.0356	0.4428	0.0199	0.2055	1.13178	0.136028	1.69194	0.0760379	0.785216	413.1	49.6501	617.558	27.7538	286.604
KEPULAUAN BANGKA BELITUNG	KAB. BANGKA	MERAWANG	SIPSN	2022	Good	4	2.337	852.875	0.2962	0.0356	0.4428	0.0199	0.2055	0.692219	0.0831972	1.03482	0.0465063	0.480254	252.66	30.367	377.711	16.9748	175.293
KEPULAUAN BANGKA BELITUNG	KAB. BANGKA	MENDO BARAT	SIPSN	2022	Good	4	3.833	1398.96	0.2962	0.0356	0.4428	0.0199	0.2055	1.13533	0.136455	1.69725	0.0762767	0.787682	414.397	49.806	619.497	27.841	287.504
KEPULAUAN BANGKA BELITUNG	KAB. BANGKA	PEMALI	SIPSN	2022	Good	4	2.659	970.534	0.2962	0.0356	0.4428	0.0199	0.2055	0.787596	0.0946604	1.17741	0.0529141	0.546424	287.472	34.551	429.753	19.3136	199.445
KEPULAUAN BANGKA BELITUNG	KAB. BANGKA	BAKAM	SIPSN	2022	Good	4	1.432	522.838	0.2962	0.0356	0.4428	0.0199	0.2055	0.424158	0.0509792	0.63409	0.0284968	0.294276	154.818	18.6074	231.443	10.4013	107.411
KEPULAUAN BANGKA BELITUNG	KAB. BANGKA	RIAU SILIP	SIPSN	2022	Good	4	2.153	785.785	0.2962	0.0356	0.4428	0.0199	0.2055	0.637719	0.0766468	0.953348	0.0428447	0.442442	232.767	27.9761	347.972	15.6383	161.491
KEPULAUAN BANGKA BELITUNG	KAB. BANGKA	PUDING BESAR	SIPSN	2022	Good	4	1.507	550.191	0.2962	0.0356	0.4428	0.0199	0.2055	0.446373	0.0536492	0.6673	0.0299893	0.309688	162.926	19.582	243.564	10.9461	113.036
KEPULAUAN BANGKA BELITUNG	KAB. BELITUNG	TANJUNG PANDAN	SIPSN	2022	Good	4	8.042	2935.18	0.2621	0.0117	0.6465	0.0079	0.0718	2.10781	0.0940914	5.19915	0.0635318	0.577416	769.35	34.3434	1897.69	23.1891	210.757
KEPULAUAN BANGKA BELITUNG	KAB. BELITUNG	MEMBALONG	SIPSN	2022	Good	4	2.015	735.356	0.2621	0.0117	0.6465	0.0079	0.0718	0.528132	0.0235755	1.3027	0.0159185	0.144677	192.768	8.60506	475.485	5.81025	52.8071
KEPULAUAN BANGKA BELITUNG	KAB. BELITUNG	SELAT NASIK	SIPSN	2022	Good	4	0.455	166.226	0.2621	0.0117	0.6465	0.0079	0.0718	0.119256	0.0053235	0.294158	0.0035945	0.032669	43.5283	1.94308	107.367	1.31199	11.9242
KEPULAUAN BANGKA BELITUNG	KAB. BELITUNG	SIJUK	SIPSN	2022	Good	4	2.441	891.003	0.2621	0.0117	0.6465	0.0079	0.0718	0.639786	0.0285597	1.57811	0.0192839	0.175264	233.522	10.4243	576.009	7.03862	63.9713
KEPULAUAN BANGKA BELITUNG	KAB. BELITUNG	BADAU	SIPSN	2022	Good	4	1.167	425.952	0.2621	0.0117	0.6465	0.0079	0.0718	0.305871	0.0136539	0.754466	0.0092193	0.0837906	111.643	4.98367	275.38	3.36504	30.5836
KEPULAUAN BANGKA BELITUNG	KAB. BANGKA SELATAN	TOBOALI	SIPSN	2021	Average	3	6.14	2241.03	0.3443	0.0149	0.3035	0.081	0.2563	2.114	0.091486	1.86349	0.49734	1.57368	771.611	33.3924	680.174	181.529	574.394
KEPULAUAN BANGKA BELITUNG	KAB. BANGKA SELATAN	LEPAR	SIPSN	2021	Average	3	0.615	224.625	0.3443	0.0149	0.3035	0.081	0.2563	0.211744	0.0091635	0.186653	0.049815	0.157624	77.2867	3.34468	68.1282	18.1825	57.5329
KEPULAUAN BANGKA BELITUNG	KAB. BANGKA SELATAN	AIRGEGAS	SIPSN	2021	Average	3	3.263	1190.96	0.3443	0.0149	0.3035	0.081	0.2563	1.12345	0.0486187	0.990321	0.264303	0.836307	410.06	17.7458	361.467	96.4706	305.252
KEPULAUAN BANGKA BELITUNG	KAB. BANGKA SELATAN	SIMPANG RIMBA	SIPSN	2021	Average	3	1.891	690.259	0.3443	0.0149	0.3035	0.081	0.2563	0.651071	0.0281759	0.573919	0.153171	0.484663	237.641	10.2842	209.48	55.9074	176.902
KEPULAUAN BANGKA BELITUNG	KAB. BANGKA SELATAN	PAYUNG	SIPSN	2021	Average	3	1.623	592.345	0.3443	0.0149	0.3035	0.081	0.2563	0.558799	0.0241827	0.492581	0.131463	0.415975	203.962	8.82669	179.792	47.984	151.831
KEPULAUAN BANGKA BELITUNG	KAB. BANGKA SELATAN	TUKAK SADAI	SIPSN	2021	Average	3	1.018	371.663	0.3443	0.0149	0.3035	0.081	0.2563	0.350497	0.0151682	0.308963	0.082458	0.260913	127.932	5.53639	112.771	30.0972	95.2334
KEPULAUAN BANGKA BELITUNG	KAB. BANGKA SELATAN	PULAU BESAR	SIPSN	2021	Average	3	0.746	272.11	0.3443	0.0149	0.3035	0.081	0.2563	0.256848	0.0111154	0.226411	0.060426	0.1912	93.7494	4.05712	82.64	22.0555	69.7879
KEPULAUAN BANGKA BELITUNG	KAB. BANGKA SELATAN	KEPULAUAN PONGOK	SIPSN	2021	Average	3	0.32	116.714	0.3443	0.0149	0.3035	0.081	0.2563	0.110176	0.004768	0.09712	0.02592	0.082016	40.2142	1.74032	35.4488	9.4608	29.9358
KEPULAUAN BANGKA BELITUNG	KAB. BANGKA TENGAH	KOBA	Sampling	2022	Best	5	2.547	929.76	0.6133	0.0169	0.2222	0.0642	0.0834	1.56208	0.0430443	0.565943	0.163517	0.21242	570.157	15.7112	206.569	59.6839	77.5332
KEPULAUAN BANGKA BELITUNG	KAB. BANGKA TENGAH	PANGKALAN BARU	Sampling	2022	Best	5	2.473	902.786	0.6133	0.0169	0.2222	0.0642	0.0834	1.51669	0.0417937	0.549501	0.158767	0.206248	553.592	15.2547	200.568	57.9498	75.2806
KEPULAUAN BANGKA BELITUNG	KAB. BANGKA TENGAH	SUNGAI SELAN	Sampling	2022	Best	5	2.129	777.058	0.6133	0.0169	0.2222	0.0642	0.0834	1.30572	0.0359801	0.473064	0.136682	0.177559	476.586	13.1327	172.668	49.8889	64.8089
KEPULAUAN BANGKA BELITUNG	KAB. BANGKA TENGAH	SIMPANG KATIS	Sampling	2022	Best	5	1.53	558.487	0.6133	0.0169	0.2222	0.0642	0.0834	0.938349	0.025857	0.339966	0.098226	0.127602	342.497	9.4378	124.088	35.8525	46.5747
KEPULAUAN BANGKA BELITUNG	KAB. BANGKA TENGAH	NAMANG	Sampling	2022	Best	5	1	364.864	0.6133	0.0169	0.2222	0.0642	0.0834	0.6133	0.0169	0.2222	0.0642	0.0834	223.855	6.1685	81.103	23.433	30.441
KEPULAUAN BANGKA BELITUNG	KAB. BANGKA TENGAH	LUBUK BESAR	Sampling	2022	Best	5	1.883	687.137	0.6133	0.0169	0.2222	0.0642	0.0834	1.15484	0.0318227	0.418403	0.120889	0.157042	421.518	11.6153	152.717	44.1243	57.3204
KEPULAUAN BANGKA BELITUNG	KAB. BANGKA BARAT	MENTOK	SIPSN	2020	Bad	2	4.127	1506.17	0.1902	0.0221	0.6429	0.001	0.1438	0.784955	0.0912067	2.65325	0.004127	0.593463	286.509	33.2904	968.436	1.50635	216.614
KEPULAUAN BANGKA BELITUNG	KAB. BANGKA BARAT	SIMPANG TERITIP	SIPSN	2020	Bad	2	2.398	875.23	0.1902	0.0221	0.6429	0.001	0.1438	0.4561	0.0529958	1.54167	0.002398	0.344832	166.476	19.3435	562.711	0.87527	125.864
KEPULAUAN BANGKA BELITUNG	KAB. BANGKA BARAT	JEBUS	SIPSN	2020	Bad	2	1.765	644.051	0.1902	0.0221	0.6429	0.001	0.1438	0.335703	0.0390065	1.13472	0.001765	0.253807	122.532	14.2374	414.172	0.644225	92.6396
KEPULAUAN BANGKA BELITUNG	KAB. BANGKA BARAT	KELAPA	SIPSN	2020	Bad	2	2.698	984.779	0.1902	0.0221	0.6429	0.001	0.1438	0.51316	0.0596258	1.73454	0.002698	0.387972	187.303	21.7634	633.109	0.98477	141.61
KEPULAUAN BANGKA BELITUNG	KAB. BANGKA BARAT	TEMPILANG	SIPSN	2020	Bad	2	2.212	807.528	0.1902	0.0221	0.6429	0.001	0.1438	0.420722	0.0488852	1.42209	0.002212	0.318086	153.564	17.8431	519.065	0.80738	116.101
KEPULAUAN BANGKA BELITUNG	KAB. BANGKA BARAT	PARITTIGA	SIPSN	2020	Bad	2	2.762	1007.97	0.1902	0.0221	0.6429	0.001	0.1438	0.525332	0.0610402	1.77569	0.002762	0.397176	191.746	22.2797	648.127	1.00813	144.969
KEPULAUAN BANGKA BELITUNG	KAB. BELITUNG TIMUR	MANGGAR	SIPSN	2022	Good	4	3.029	1105.55	0.2511	0.0224	0.661	0.0091	0.0564	0.760582	0.0678496	2.00217	0.0275639	0.170836	277.612	24.7651	730.792	10.0608	62.355
KEPULAUAN BANGKA BELITUNG	KAB. BELITUNG TIMUR	GANTUNG	SIPSN	2022	Good	4	2.261	825.273	0.2511	0.0224	0.661	0.0091	0.0564	0.567737	0.0506464	1.49452	0.0205751	0.12752	207.224	18.4859	545.5	7.50991	46.5449
KEPULAUAN BANGKA BELITUNG	KAB. BELITUNG TIMUR	DENDANG	SIPSN	2022	Good	4	0.822	299.852	0.2511	0.0224	0.661	0.0091	0.0564	0.206404	0.0184128	0.543342	0.0074802	0.0463608	75.3375	6.72067	198.32	2.73027	16.9217
KEPULAUAN BANGKA BELITUNG	KAB. BELITUNG TIMUR	KELAPA KAMPIT	SIPSN	2022	Good	4	1.461	533.28	0.2511	0.0224	0.661	0.0091	0.0564	0.366857	0.0327264	0.965721	0.0132951	0.0824004	133.903	11.9451	352.488	4.85271	30.0761
KEPULAUAN BANGKA BELITUNG	KAB. BELITUNG TIMUR	DAMAR	SIPSN	2022	Good	4	1.022	373.051	0.2511	0.0224	0.661	0.0091	0.0564	0.256624	0.0228928	0.675542	0.0093002	0.0576408	93.6678	8.35587	246.573	3.39457	21.0389
KEPULAUAN BANGKA BELITUNG	KAB. BELITUNG TIMUR	SIMPANG RENGGIANG	SIPSN	2022	Good	4	0.581	211.99	0.2511	0.0224	0.661	0.0091	0.0564	0.145889	0.0130144	0.384041	0.0052871	0.0327684	53.2495	4.75026	140.175	1.92979	11.9605
KEPULAUAN BANGKA BELITUNG	KAB. BELITUNG TIMUR	SIMPANG PESAK	SIPSN	2022	Good	4	0.654	238.676	0.2511	0.0224	0.661	0.0091	0.0564	0.164219	0.0146496	0.432294	0.0059514	0.0368856	59.9401	5.3471	157.787	2.17226	13.4632
KEPULAUAN BANGKA BELITUNG	KOTA PANGKAL PINANG	BUKIT INTAN	Average of Province	Filling Data	Worst	1	4.799	1751.67	0.7827	0	0.1592	0.0254	0.0327	3.75618	0	0.764001	0.121895	0.156927	1371	0	278.86	44.4915	57.2785
KEPULAUAN BANGKA BELITUNG	KOTA PANGKAL PINANG	TAMAN SARI	Average of Province	Filling Data	Worst	1	2.335	852.445	0.7827	0	0.1592	0.0254	0.0327	1.8276	0	0.371732	0.059309	0.0763545	667.076	0	135.682	21.6478	27.8694
KEPULAUAN BANGKA BELITUNG	KOTA PANGKAL PINANG	PANGKAL BALAM	Average of Province	Filling Data	Worst	1	2.605	950.956	0.7827	0	0.1592	0.0254	0.0327	2.03893	0	0.414716	0.066167	0.0851835	744.211	0	151.371	24.151	31.092
KEPULAUAN BANGKA BELITUNG	KOTA PANGKAL PINANG	RANGKUI	Average of Province	Filling Data	Worst	1	4.453	1625.46	0.7827	0	0.1592	0.0254	0.0327	3.48536	0	0.708918	0.113106	0.145613	1272.16	0	258.755	41.2838	53.1488
KEPULAUAN BANGKA BELITUNG	KOTA PANGKAL PINANG	GERUNGGANG	Average of Province	Filling Data	Worst	1	5.847	2134.09	0.7827	0	0.1592	0.0254	0.0327	4.57645	0	0.930842	0.148514	0.191197	1670.4	0	339.757	54.2075	69.7869
KEPULAUAN BANGKA BELITUNG	KOTA PANGKAL PINANG	GABEK	Average of Province	Filling Data	Worst	1	4.148	1514.16	0.7827	0	0.1592	0.0254	0.0327	3.24664	0	0.660362	0.105359	0.13564	1185.02	0	241.032	38.4561	49.5085
KEPULAUAN BANGKA BELITUNG	KOTA PANGKAL PINANG	GIRIMAYA	Average of Province	Filling Data	Worst	1	2.18	795.838	0.7827	0	0.1592	0.0254	0.0327	1.70629	0	0.347056	0.055372	0.071286	622.794	0	126.675	20.2108	26.0194
KEPULAUAN RIAU	KAB. BINTAN	GUNUNG KIJANG	SIPSN	2022	Good	4	1.059	386.668	0.39	0.004	0.5318	0.067	0.0072	0.41301	0.004236	0.563176	0.070953	0.0076248	150.749	1.54614	205.559	25.8978	2.78305
KEPULAUAN RIAU	KAB. BINTAN	BINTAN TIMUR	SIPSN	2022	Good	4	3.094	1129.4	0.39	0.004	0.5318	0.067	0.0072	1.20666	0.012376	1.64539	0.207298	0.0222768	440.431	4.51724	600.567	75.6638	8.13103
KEPULAUAN RIAU	KAB. BINTAN	BINTAN UTARA	SIPSN	2022	Good	4	1.535	560.185	0.39	0.004	0.5318	0.067	0.0072	0.59865	0.00614	0.816313	0.102845	0.011052	218.507	2.2411	297.954	37.5384	4.03398
KEPULAUAN RIAU	KAB. BINTAN	TELUK BINTAN	SIPSN	2022	Good	4	0.737	269.119	0.39	0.004	0.5318	0.067	0.0072	0.28743	0.002948	0.391937	0.049379	0.0053064	104.912	1.07602	143.057	18.0233	1.93684
KEPULAUAN RIAU	KAB. BINTAN	TAMBELAN	SIPSN	2022	Good	4	0.329	119.932	0.39	0.004	0.5318	0.067	0.0072	0.12831	0.001316	0.174962	0.022043	0.0023688	46.8331	0.48034	63.8612	8.0457	0.864612
KEPULAUAN RIAU	KAB. BINTAN	TELOK SEBONG	SIPSN	2022	Good	4	1.195	436.084	0.39	0.004	0.5318	0.067	0.0072	0.46605	0.00478	0.635501	0.080065	0.008604	170.108	1.7447	231.958	29.2237	3.14046
KEPULAUAN RIAU	KAB. BINTAN	TOAPAYA	SIPSN	2022	Good	4	0.891	325.247	0.39	0.004	0.5318	0.067	0.0072	0.34749	0.003564	0.473834	0.059697	0.0064152	126.834	1.30086	172.949	21.7894	2.34155
KEPULAUAN RIAU	KAB. BINTAN	MANTANG	SIPSN	2022	Good	4	0.282	103.024	0.39	0.004	0.5318	0.067	0.0072	0.10998	0.001128	0.149968	0.018894	0.0020304	40.1427	0.41172	54.7382	6.89631	0.741096
KEPULAUAN RIAU	KAB. BINTAN	BINTAN PESISIR	SIPSN	2022	Good	4	0.439	160.092	0.39	0.004	0.5318	0.067	0.0072	0.17121	0.001756	0.23346	0.029413	0.0031608	62.4916	0.64094	85.213	10.7357	1.15369
KEPULAUAN RIAU	KAB. BINTAN	SERI KUALA LOBAM	SIPSN	2022	Good	4	1.218	444.515	0.39	0.004	0.5318	0.067	0.0072	0.47502	0.004872	0.647732	0.081606	0.0087696	173.382	1.77828	236.422	29.7862	3.2009
KEPULAUAN RIAU	KAB. KARIMUN	MORO	SIPSN	2022	Good	4	1.945	710.043	0.2928	0	0.6117	0.0823	0.0132	0.569496	0	1.18976	0.160074	0.025674	207.866	0	434.261	58.4268	9.37101
KEPULAUAN RIAU	KAB. KARIMUN	KUNDUR	SIPSN	2022	Good	4	5.348	1952.17	0.2928	0	0.6117	0.0823	0.0132	1.56589	0	3.27137	0.44014	0.0705936	571.551	0	1194.05	160.651	25.7667
KEPULAUAN RIAU	KAB. KARIMUN	KARIMUN	SIPSN	2022	Good	4	8.218	2999.55	0.2928	0	0.6117	0.0823	0.0132	2.40623	0	5.02695	0.676341	0.108478	878.274	0	1834.84	246.865	39.5943
KEPULAUAN RIAU	KAB. KARIMUN	MERAL	SIPSN	2022	Good	4	8.886	3243.49	0.2928	0	0.6117	0.0823	0.0132	2.60182	0	5.43557	0.731318	0.117295	949.665	0	1983.98	266.931	42.8127
KEPULAUAN RIAU	KAB. KARIMUN	TEBING	SIPSN	2022	Good	4	5.598	2043.24	0.2928	0	0.6117	0.0823	0.0132	1.63909	0	3.4243	0.460715	0.0738936	598.269	0	1249.87	168.161	26.9712
KEPULAUAN RIAU	KAB. KARIMUN	BURU	SIPSN	2022	Good	4	1.816	662.845	0.2928	0	0.6117	0.0823	0.0132	0.531725	0	1.11085	0.149457	0.0239712	194.08	0	405.459	54.5517	8.74949
KEPULAUAN RIAU	KAB. KARIMUN	KUNDUR UTARA	SIPSN	2022	Good	4	2.204	804.315	0.2928	0	0.6117	0.0823	0.0132	0.645331	0	1.34819	0.181389	0.0290928	235.546	0	492.088	66.2071	10.6189
KEPULAUAN RIAU	KAB. KARIMUN	KUNDUR BARAT	SIPSN	2022	Good	4	3.29	1201	0.2928	0	0.6117	0.0823	0.0132	0.963312	0	2.01249	0.270767	0.043428	351.609	0	734.56	98.83	15.8512
KEPULAUAN RIAU	KAB. KARIMUN	DURAI	SIPSN	2022	Good	4	1.091	398.245	0.2928	0	0.6117	0.0823	0.0132	0.319445	0	0.667365	0.0897893	0.0144012	116.597	0	243.588	32.7731	5.25644
KEPULAUAN RIAU	KAB. KARIMUN	MERAL BARAT	SIPSN	2022	Good	4	2.873	1048.51	0.2928	0	0.6117	0.0823	0.0132	0.841214	0	1.75741	0.236448	0.0379236	307.043	0	641.456	86.3035	13.8421
KEPULAUAN RIAU	KAB. KARIMUN	UNGAR	SIPSN	2022	Good	4	1.026	374.583	0.2928	0	0.6117	0.0823	0.0132	0.300413	0	0.627604	0.0844398	0.0135432	109.651	0	229.076	30.8205	4.94327
KEPULAUAN RIAU	KAB. KARIMUN	BELAT	SIPSN	2022	Good	4	1.18	430.608	0.2928	0	0.6117	0.0823	0.0132	0.345504	0	0.721806	0.097114	0.015576	126.109	0	263.459	35.4466	5.68524
KEPULAUAN RIAU	KAB. NATUNA	MIDAI	SIPSN	2022	Good	4	0.284	103.743	0.2164	0.0115	0.5783	0.1638	0.03	0.0614576	0.003266	0.164237	0.0465192	0.00852	22.432	1.19209	59.9466	16.9795	3.1098
KEPULAUAN RIAU	KAB. NATUNA	BUNGURAN BARAT	SIPSN	2022	Good	4	0.638	233.028	0.2164	0.0115	0.5783	0.1638	0.03	0.138063	0.007337	0.368955	0.104504	0.01914	50.3931	2.678	134.669	38.1441	6.9861
KEPULAUAN RIAU	KAB. NATUNA	SERASAN	SIPSN	2022	Good	4	0.424	154.856	0.2164	0.0115	0.5783	0.1638	0.03	0.0917536	0.004876	0.245199	0.0694512	0.01272	33.4901	1.77974	89.4977	25.3497	4.6428
KEPULAUAN RIAU	KAB. NATUNA	BUNGURAN TIMUR	SIPSN	2022	Good	4	2.23	813.907	0.2164	0.0115	0.5783	0.1638	0.03	0.482572	0.025645	1.28961	0.365274	0.0669	176.139	9.36042	470.707	133.325	24.4185
KEPULAUAN RIAU	KAB. NATUNA	BUNGURAN UTARA	SIPSN	2022	Good	4	0.323	117.768	0.2164	0.0115	0.5783	0.1638	0.03	0.0698972	0.0037145	0.186791	0.0529074	0.00969	25.5125	1.35579	68.1787	19.3112	3.53685
KEPULAUAN RIAU	KAB. NATUNA	SUBI	SIPSN	2022	Good	4	0.184	67.092	0.2164	0.0115	0.5783	0.1638	0.03	0.0398176	0.002116	0.106407	0.0301392	0.00552	14.5334	0.77234	38.8386	11.0008	2.0148
KEPULAUAN RIAU	KAB. NATUNA	PULAU LAUT	SIPSN	2022	Good	4	0.189	68.929	0.2164	0.0115	0.5783	0.1638	0.03	0.0408996	0.0021735	0.109299	0.0309582	0.00567	14.9284	0.793328	39.894	11.2997	2.06955
KEPULAUAN RIAU	KAB. NATUNA	PULAU TIGA	SIPSN	2022	Good	4	0.307	111.907	0.2164	0.0115	0.5783	0.1638	0.03	0.0664348	0.0035305	0.177538	0.0502866	0.00921	24.2487	1.28863	64.8014	18.3546	3.36165
KEPULAUAN RIAU	KAB. NATUNA	BUNGURAN TIMUR LAUT	SIPSN	2022	Good	4	0.447	163.166	0.2164	0.0115	0.5783	0.1638	0.03	0.0967308	0.0051405	0.2585	0.0732186	0.01341	35.3067	1.87628	94.3525	26.7248	4.89465
KEPULAUAN RIAU	KAB. NATUNA	BUNGURAN TENGAH	SIPSN	2022	Good	4	0.304	110.945	0.2164	0.0115	0.5783	0.1638	0.03	0.0657856	0.003496	0.175803	0.0497952	0.00912	24.0117	1.27604	64.1682	18.1752	3.3288
KEPULAUAN RIAU	KAB. NATUNA	BUNGURAN SELATAN	SIPSN	2022	Good	4	0.275	100.506	0.2164	0.0115	0.5783	0.1638	0.03	0.05951	0.0031625	0.159033	0.045045	0.00825	21.7212	1.15431	58.0469	16.4414	3.01125
KEPULAUAN RIAU	KAB. NATUNA	SERASAN TIMUR	SIPSN	2022	Good	4	0.266	97.037	0.2164	0.0115	0.5783	0.1638	0.03	0.0575624	0.003059	0.153828	0.0435708	0.00798	21.0103	1.11654	56.1471	15.9033	2.9127
KEPULAUAN RIAU	KAB. NATUNA	BUNGURAN BATUBI	SIPSN	2022	Good	4	0.316	115.464	0.2164	0.0115	0.5783	0.1638	0.03	0.0683824	0.003634	0.182743	0.0517608	0.00948	24.9596	1.32641	66.7011	18.8927	3.4602
KEPULAUAN RIAU	KAB. NATUNA	PULAU TIGA BARAT	SIPSN	2022	Good	4	0.184	67.121	0.2164	0.0115	0.5783	0.1638	0.03	0.0398176	0.002116	0.106407	0.0301392	0.00552	14.5334	0.77234	38.8386	11.0008	2.0148
KEPULAUAN RIAU	KAB. NATUNA	SUAK MIDAI	SIPSN	2022	Good	4	0.146	53.184	0.2164	0.0115	0.5783	0.1638	0.03	0.0315944	0.001679	0.0844318	0.0239148	0.00438	11.532	0.612835	30.8176	8.7289	1.5987
KEPULAUAN RIAU	KAB. LINGGA	SINGKEP	SIPSN	2022	Good	4	1.35	492.619	0.1108	0.0049	0.7095	0.1558	0.019	0.14958	0.006615	0.957825	0.21033	0.02565	54.5967	2.41447	349.606	76.7705	9.36225
KEPULAUAN RIAU	KAB. LINGGA	LINGGA	SIPSN	2022	Good	4	0.708	258.441	0.1108	0.0049	0.7095	0.1558	0.019	0.0784464	0.0034692	0.502326	0.110306	0.013452	28.6329	1.26626	183.349	40.2618	4.90998
KEPULAUAN RIAU	KAB. LINGGA	SENAYANG	SIPSN	2022	Good	4	0.363	132.417	0.1108	0.0049	0.7095	0.1558	0.019	0.0402204	0.0017787	0.257549	0.0565554	0.006897	14.6804	0.649225	94.0052	20.6427	2.5174
KEPULAUAN RIAU	KAB. LINGGA	SINGKEP BARAT	SIPSN	2022	Good	4	0.818	298.741	0.1108	0.0049	0.7095	0.1558	0.019	0.0906344	0.0040082	0.580371	0.127444	0.015542	33.0816	1.46299	211.835	46.5172	5.67283
KEPULAUAN RIAU	KAB. LINGGA	LINGGA UTARA	SIPSN	2022	Good	4	0.589	214.809	0.1108	0.0049	0.7095	0.1558	0.019	0.0652612	0.0028861	0.417895	0.0917662	0.011191	23.8203	1.05343	152.532	33.4947	4.08472
KEPULAUAN RIAU	KAB. LINGGA	SINGKEP PESISIR	SIPSN	2022	Good	4	0.279	101.719	0.1108	0.0049	0.7095	0.1558	0.019	0.0309132	0.0013671	0.197951	0.0434682	0.005301	11.2833	0.498991	72.2519	15.8659	1.93487
KEPULAUAN RIAU	KAB. LINGGA	LINGGA TIMUR	SIPSN	2022	Good	4	0.296	108.071	0.1108	0.0049	0.7095	0.1558	0.019	0.0327968	0.0014504	0.210012	0.0461168	0.005624	11.9708	0.529396	76.6544	16.8326	2.05276
KEPULAUAN RIAU	KAB. LINGGA	SELAYAR	SIPSN	2022	Good	4	0.202	73.561	0.1108	0.0049	0.7095	0.1558	0.019	0.0223816	0.0009898	0.143319	0.0314716	0.003838	8.16928	0.361277	52.3114	11.4871	1.40087
KEPULAUAN RIAU	KAB. LINGGA	SINGKEP SELATAN	SIPSN	2022	Good	4	0.164	59.877	0.1108	0.0049	0.7095	0.1558	0.019	0.0181712	0.0008036	0.116358	0.0255512	0.003116	6.63249	0.293314	42.4707	9.32619	1.13734
KEPULAUAN RIAU	KAB. LINGGA	KEPULAUAN POSEK	SIPSN	2022	Good	4	0.187	68.354	0.1108	0.0049	0.7095	0.1558	0.019	0.0207196	0.0009163	0.132677	0.0291346	0.003553	7.56265	0.33445	48.4269	10.6341	1.29684
KEPULAUAN RIAU	KAB. LINGGA	KATANG BIDARE	SIPSN	2022	Good	4	0.235	85.953	0.1108	0.0049	0.7095	0.1558	0.019	0.026038	0.0011515	0.166733	0.036613	0.004465	9.50387	0.420297	60.8574	13.3637	1.62972
KEPULAUAN RIAU	KAB. LINGGA	TEMIANG PESISIR	SIPSN	2022	Good	4	0.214	77.955	0.1108	0.0049	0.7095	0.1558	0.019	0.0237112	0.0010486	0.151833	0.0333412	0.004066	8.65459	0.382739	55.419	12.1695	1.48409
KEPULAUAN RIAU	KAB. LINGGA	BAKUNG SERUMPUN	SIPSN	2022	Good	4	0.436	159.18	0.1108	0.0049	0.7095	0.1558	0.019	0.0483088	0.0021364	0.309342	0.0679288	0.008284	17.6327	0.779786	112.91	24.794	3.02366
KEPULAUAN RIAU	KAB. KEPULAUAN ANAMBAS	SIANTAN	SIPSN	2022	Good	4	0.759	276.894	0.096394	0	0.813506	0.0667	0.0234	0.073163	0	0.617451	0.0506253	0.0177606	26.7045	0	225.37	18.4782	6.48262
KEPULAUAN RIAU	KAB. KEPULAUAN ANAMBAS	PALMATAK	SIPSN	2022	Good	4	0.44	160.43	0.096394	0	0.813506	0.0667	0.0234	0.0424134	0	0.357943	0.029348	0.010296	15.4809	0	130.649	10.712	3.75804
KEPULAUAN RIAU	KAB. KEPULAUAN ANAMBAS	SIANTAN TIMUR	SIPSN	2022	Good	4	0.255	92.992	0.096394	0	0.813506	0.0667	0.0234	0.0245805	0	0.207444	0.0170085	0.005967	8.97187	0	75.7171	6.2081	2.17795
KEPULAUAN RIAU	KAB. KEPULAUAN ANAMBAS	SIANTAN SELATAN	SIPSN	2022	Good	4	0.224	81.6	0.096394	0	0.813506	0.0667	0.0234	0.0215923	0	0.182225	0.0149408	0.0052416	7.88117	0	66.5123	5.45339	1.91318
KEPULAUAN RIAU	KAB. KEPULAUAN ANAMBAS	JEMAJA TIMUR	SIPSN	2022	Good	4	0.164	59.961	0.096394	0	0.813506	0.0667	0.0234	0.0158086	0	0.133415	0.0109388	0.0038376	5.77014	0	48.6965	3.99266	1.40072
KEPULAUAN RIAU	KAB. KEPULAUAN ANAMBAS	JEMAJA	SIPSN	2022	Good	4	0.35	127.669	0.096394	0	0.813506	0.0667	0.0234	0.0337379	0	0.284727	0.023345	0.00819	12.3143	0	103.925	8.52092	2.98935
KEPULAUAN RIAU	KAB. KEPULAUAN ANAMBAS	SIANTAN TENGAH	SIPSN	2022	Good	4	0.198	72.249	0.096394	0	0.813506	0.0667	0.0234	0.019086	0	0.161074	0.0132066	0.0046332	6.96639	0	58.7921	4.82041	1.69112
KEPULAUAN RIAU	KAB. KEPULAUAN ANAMBAS	SIANTAN UTARA	SIPSN	2022	Good	4	0.117	42.674	0.096394	0	0.813506	0.0667	0.0234	0.0112781	0	0.0951802	0.0078039	0.0027378	4.11651	0	34.7408	2.84842	0.999297
KEPULAUAN RIAU	KAB. KEPULAUAN ANAMBAS	JEMAJA BARAT	SIPSN	2022	Good	4	0.065	23.805	0.096394	0	0.813506	0.0667	0.0234	0.00626561	0	0.0528779	0.0043355	0.001521	2.28695	0	19.3004	1.58246	0.555165
KEPULAUAN RIAU	KAB. KEPULAUAN ANAMBAS	KUTE SIANTAN	SIPSN	2022	Good	4	0.212	77.268	0.096394	0	0.813506	0.0667	0.0234	0.0204355	0	0.172463	0.0141404	0.0049608	7.45897	0	62.9491	5.16125	1.81069
KEPULAUAN RIAU	KOTA BATAM	BELAKANG PADANG	SIPSN	2022	Good	4	4.688	1711.22	0.778536	0.0028	0.158664	0.0506	0.0094	3.64978	0.0131264	0.743817	0.237213	0.0440672	1332.17	4.79114	271.493	86.5827	16.0845
KEPULAUAN RIAU	KOTA BATAM	BATU AMPAR	SIPSN	2022	Good	4	13.725	5009.7	0.778536	0.0028	0.158664	0.0506	0.0094	10.6854	0.03843	2.17766	0.694485	0.129015	3900.17	14.027	794.848	253.487	47.0905
KEPULAUAN RIAU	KOTA BATAM	SEKUPANG	SIPSN	2022	Good	4	36.606	13361	0.778536	0.0028	0.158664	0.0506	0.0094	28.4991	0.102497	5.80806	1.85226	0.344096	10402.2	37.4113	2119.94	676.076	125.595
KEPULAUAN RIAU	KOTA BATAM	NONGSA	SIPSN	2022	Good	4	19.99	7296.2	0.778536	0.0028	0.158664	0.0506	0.0094	15.5629	0.055972	3.1717	1.01149	0.187906	5680.47	20.4298	1157.67	369.195	68.5857
KEPULAUAN RIAU	KOTA BATAM	BULANG	SIPSN	2022	Good	4	2.676	976.68	0.778536	0.0028	0.158664	0.0506	0.0094	2.08336	0.0074928	0.424585	0.135406	0.0251544	760.427	2.73487	154.974	49.423	9.18136
KEPULAUAN RIAU	KOTA BATAM	LUBUK BAJA	SIPSN	2022	Good	4	19.884	7257.77	0.778536	0.0028	0.158664	0.0506	0.0094	15.4804	0.0556752	3.15488	1.00613	0.18691	5650.35	20.3214	1151.53	367.238	68.222
KEPULAUAN RIAU	KOTA BATAM	SEI BEDUK	SIPSN	2022	Good	4	21.078	7693.58	0.778536	0.0028	0.158664	0.0506	0.0094	16.41	0.0590184	3.34432	1.06655	0.198133	5989.64	21.5417	1220.68	389.29	72.3186
KEPULAUAN RIAU	KOTA BATAM	GALANG	SIPSN	2022	Good	4	4.279	1561.85	0.778536	0.0028	0.158664	0.0506	0.0094	3.33136	0.0119812	0.678924	0.216517	0.0402226	1215.94	4.37314	247.807	79.0289	14.6812
KEPULAUAN RIAU	KOTA BATAM	BENGKONG	SIPSN	2022	Good	4	27.356	9984.83	0.778536	0.0028	0.158664	0.0506	0.0094	21.2976	0.0765968	4.34041	1.38421	0.257146	7773.63	27.9578	1584.25	505.238	93.8584
KEPULAUAN RIAU	KOTA BATAM	BATAM KOTA	SIPSN	2022	Good	4	42.922	15666.4	0.778536	0.0028	0.158664	0.0506	0.0094	33.4163	0.120182	6.81018	2.17185	0.403467	12197	43.8663	2485.72	792.726	147.265
KEPULAUAN RIAU	KOTA BATAM	SAGULUNG	SIPSN	2022	Good	4	46.901	17118.9	0.778536	0.0028	0.158664	0.0506	0.0094	36.5141	0.131323	7.4415	2.37319	0.440869	13327.7	47.9328	2716.15	866.215	160.917
KEPULAUAN RIAU	KOTA BATAM	BATU AJI	SIPSN	2022	Good	4	30.853	11261.2	0.778536	0.0028	0.158664	0.0506	0.0094	24.0202	0.0863884	4.89526	1.56116	0.290018	8767.36	31.5318	1786.77	569.824	105.857
KEPULAUAN RIAU	KOTA TANJUNG PINANG	TANJUNG PINANG BARAT	SIPSN	2022	Good	4	6.138	2240.3	0.888469	0.0034	0.0626309	0.0418	0.0037	5.45342	0.0208692	0.384429	0.256568	0.0227106	1990.5	7.61726	140.316	93.6475	8.28937
KEPULAUAN RIAU	KOTA TANJUNG PINANG	TANJUNG PINANG TIMUR	SIPSN	2022	Good	4	13.66	4985.98	0.888469	0.0034	0.0626309	0.0418	0.0037	12.1365	0.046444	0.855539	0.570988	0.050542	4429.82	16.9521	312.272	208.411	18.4478
KEPULAUAN RIAU	KOTA TANJUNG PINANG	TANJUNG PINANG KOTA	SIPSN	2022	Good	4	2.004	731.482	0.888469	0.0034	0.0626309	0.0418	0.0037	1.78049	0.0068136	0.125512	0.0837672	0.0074148	649.88	2.48696	45.812	30.575	2.7064
KEPULAUAN RIAU	KOTA TANJUNG PINANG	BUKIT BESTARI	SIPSN	2022	Good	4	7.001	2555.35	0.888469	0.0034	0.0626309	0.0418	0.0037	6.22017	0.0238034	0.438479	0.292642	0.0259037	2270.36	8.68824	160.045	106.814	9.45485
DKI JAKARTA	KOTA ADM. JAKARTA PUSAT	GAMBIR	SIPSN	2022	Good	4	14.63	5340.07	0.954	0.0006	0.0439	0.0009	0.0006	13.957	0.008778	0.642257	0.013167	0.008778	5094.31	3.20397	234.424	4.80595	3.20397
DKI JAKARTA	KOTA ADM. JAKARTA PUSAT	SAWAH BESAR	SIPSN	2022	Good	4	19.199	7007.56	0.954	0.0006	0.0439	0.0009	0.0006	18.3158	0.0115194	0.842836	0.0172791	0.0115194	6685.28	4.20458	307.635	6.30687	4.20458
DKI JAKARTA	KOTA ADM. JAKARTA PUSAT	KEMAYORAN	SIPSN	2022	Good	4	39.108	14274.3	0.954	0.0006	0.0439	0.0009	0.0006	37.309	0.0234648	1.71684	0.0351972	0.0234648	13617.8	8.56465	626.647	12.847	8.56465
DKI JAKARTA	KOTA ADM. JAKARTA PUSAT	SENEN	SIPSN	2022	Good	4	19.026	6944.35	0.954	0.0006	0.0439	0.0009	0.0006	18.1508	0.0114156	0.835241	0.0171234	0.0114156	6625.04	4.16669	304.863	6.25004	4.16669
DKI JAKARTA	KOTA ADM. JAKARTA PUSAT	CEMPAKA PUTIH	SIPSN	2022	Good	4	15.001	5475.25	0.954	0.0006	0.0439	0.0009	0.0006	14.311	0.0090006	0.658544	0.0135009	0.0090006	5223.5	3.28522	240.369	4.92783	3.28522
DKI JAKARTA	KOTA ADM. JAKARTA PUSAT	MENTENG	SIPSN	2022	Good	4	13.41	4894.54	0.954	0.0006	0.0439	0.0009	0.0006	12.7931	0.008046	0.588699	0.012069	0.008046	4669.5	2.93679	214.875	4.40519	2.93679
DKI JAKARTA	KOTA ADM. JAKARTA PUSAT	TANAH ABANG	SIPSN	2022	Good	4	26.595	9707.33	0.954	0.0006	0.0439	0.0009	0.0006	25.3716	0.015957	1.16752	0.0239355	0.015957	9260.64	5.8243	426.145	8.73646	5.8243
DKI JAKARTA	KOTA ADM. JAKARTA PUSAT	JOHAR BARU	SIPSN	2022	Good	4	21.365	7798.31	0.954	0.0006	0.0439	0.0009	0.0006	20.3822	0.012819	0.937923	0.0192285	0.012819	7439.51	4.67893	342.342	7.0184	4.67893
DKI JAKARTA	KOTA ADM. JAKARTA UTARA	PENJARINGAN	SIPSN	2022	Good	4	46.961	17140.9	0.9769	0	0.0148	0.0066	0.0017	45.8762	0	0.695023	0.309943	0.0798337	16744.8	0	253.683	113.129	29.1393
DKI JAKARTA	KOTA ADM. JAKARTA UTARA	TANJUNG PRIOK	SIPSN	2022	Good	4	60.162	21959.1	0.9769	0	0.0148	0.0066	0.0017	58.7723	0	0.890398	0.397069	0.102275	21451.9	0	324.995	144.93	37.3305
DKI JAKARTA	KOTA ADM. JAKARTA UTARA	KOJA	SIPSN	2022	Good	4	50.264	18346.5	0.9769	0	0.0148	0.0066	0.0017	49.1029	0	0.743907	0.331742	0.0854488	17922.6	0	271.526	121.086	31.1888
DKI JAKARTA	KOTA ADM. JAKARTA UTARA	CILINCING	SIPSN	2022	Good	4	64.603	23580	0.9769	0	0.0148	0.0066	0.0017	63.1107	0	0.956124	0.42638	0.109825	23035.4	0	348.985	155.629	40.0862
DKI JAKARTA	KOTA ADM. JAKARTA UTARA	PADEMANGAN	SIPSN	2022	Good	4	24.398	8905.11	0.9769	0	0.0148	0.0066	0.0017	23.8344	0	0.36109	0.161027	0.0414766	8699.56	0	131.798	58.7748	15.139
DKI JAKARTA	KOTA ADM. JAKARTA UTARA	KELAPA GADING	SIPSN	2022	Good	4	20.805	7593.7	0.9769	0	0.0148	0.0066	0.0017	20.3244	0	0.307914	0.137313	0.0353685	7418.41	0	112.389	50.1192	12.9095
DKI JAKARTA	KOTA ADM. JAKARTA BARAT	CENGKARENG	SIPSN	2022	Good	4	90.912	33182.7	0.9827	0.0011	0.0022	0.0013	0.0127	89.3392	0.100003	0.200006	0.118186	1.15458	32608.8	36.5012	73.0023	43.1377	421.423
DKI JAKARTA	KOTA ADM. JAKARTA BARAT	GROGOL PETAMBURAN	SIPSN	2022	Good	4	36.784	13426.2	0.9827	0.0011	0.0022	0.0013	0.0127	36.1476	0.0404624	0.0809248	0.0478192	0.467157	13193.9	14.7688	29.5376	17.454	170.512
DKI JAKARTA	KOTA ADM. JAKARTA BARAT	TAMAN SARI	SIPSN	2022	Good	4	19.694	7188.39	0.9827	0.0011	0.0022	0.0013	0.0127	19.3533	0.0216634	0.0433268	0.0256022	0.250114	7063.95	7.90714	15.8143	9.3448	91.2915
DKI JAKARTA	KOTA ADM. JAKARTA BARAT	TAMBORA	SIPSN	2022	Good	4	41.574	15174.4	0.9827	0.0011	0.0022	0.0013	0.0127	40.8548	0.0457314	0.0914628	0.0540462	0.52799	14912	16.692	33.3839	19.7269	192.716
DKI JAKARTA	KOTA ADM. JAKARTA BARAT	KEBON JERUK	SIPSN	2022	Good	4	56.791	20728.7	0.9827	0.0011	0.0022	0.0013	0.0127	55.8085	0.0624701	0.12494	0.0738283	0.721246	20370.1	22.8016	45.6032	26.9473	263.255
DKI JAKARTA	KOTA ADM. JAKARTA BARAT	KALIDERES	SIPSN	2022	Good	4	71.543	26113	0.9827	0.0011	0.0022	0.0013	0.0127	70.3053	0.0786973	0.157395	0.0930059	0.908596	25661.4	28.7245	57.449	33.9472	331.638
DKI JAKARTA	KOTA ADM. JAKARTA BARAT	PAL MERAH	SIPSN	2022	Good	4	36.199	13212.6	0.9827	0.0011	0.0022	0.0013	0.0127	35.5728	0.0398189	0.0796378	0.0470587	0.459727	12984.1	14.5339	29.0678	17.1764	167.8
DKI JAKARTA	KOTA ADM. JAKARTA BARAT	KEMBANGAN	SIPSN	2022	Good	4	48.283	17623.5	0.9827	0.0011	0.0022	0.0013	0.0127	47.4477	0.0531113	0.106223	0.0627679	0.613194	17318.4	19.3856	38.7712	22.9103	223.816
DKI JAKARTA	KOTA ADM. JAKARTA SELATAN	TEBET	SIPSN	2022	Good	4	39.584	14448.1	0.9966	0	0.0012	0.0019	0.0003	39.4494	0	0.0475008	0.0752096	0.0118752	14399	0	17.3378	27.4515	4.33445
DKI JAKARTA	KOTA ADM. JAKARTA SELATAN	SETIABUDI	SIPSN	2022	Good	4	19.227	7017.82	0.9966	0	0.0012	0.0019	0.0003	19.1616	0	0.0230724	0.0365313	0.0057681	6993.99	0	8.42143	13.3339	2.10536
DKI JAKARTA	KOTA ADM. JAKARTA SELATAN	MAMPANG PRAPATAN	SIPSN	2022	Good	4	26.068	9514.75	0.9966	0	0.0012	0.0019	0.0003	25.9794	0	0.0312816	0.0495292	0.0078204	9482.47	0	11.4178	18.0782	2.85445
DKI JAKARTA	KOTA ADM. JAKARTA SELATAN	PASAR MINGGU	SIPSN	2022	Good	4	54.874	20029	0.9966	0	0.0012	0.0019	0.0003	54.6874	0	0.0658488	0.104261	0.0164622	19960.9	0	24.0348	38.0551	6.0087
DKI JAKARTA	KOTA ADM. JAKARTA SELATAN	KEBAYORAN LAMA	SIPSN	2022	Good	4	54.614	19934	0.9966	0	0.0012	0.0019	0.0003	54.4283	0	0.0655368	0.103767	0.0163842	19866.3	0	23.9209	37.8748	5.98023
[truncated: 5,273 more rows]
