# Supplementary material for: Mapping Mismanaged Plastic Waste in Indonesia: Subdistrict-level Analysis through Material Flow from Sources to the Environment
Source: Research Square preprint supplement (doi:10.21203/rs.3.rs-8037401/v1), 2025-11-24
Supplement: Supplementary file 2 [file 7040712f149af5746f9f0178.docx]

Supplementary Material

**Mapping Mismanaged Plastic Waste in Indonesia: Subdistrict-level Analysis through Material Flow from Sources to the Environment**

# Attar Hikmahtiar Ramadan1, Emenda Sembiring2*, Benno Rahardyan2, and Hadi Kardhana3

1Doctoral Program of Environmental Engineering Study Programme, Faculty of Civil and Environmental Engineering, Institut Teknologi Bandung, Bandung 40132, Indonesia

2Air and Waste Management Research Group, Faculty of Civil and Environmental Engineering, Institut Teknologi Bandung, Bandung 40132, Indonesia

3Water Resources Engineering Research Group, Faculty of Civil and Environmental Engineering, Institut Teknologi Bandung, Bandung 40132, Indonesia

*Corresponding Author: Emenda@itb.ac.id

1. **Methodology**

A critical methodological step in this research is the refinement of "mismanaged plastic waste" (MPW) to isolate the specific fraction relevant to environmental leakage. We categorize MPW on the basis of its mobilization potential—that is, whether it can be transported from its disposal site by environmental forces such as hydrological runoff.

1. Potential-Leakage MPW: This category includes all MPW fractions that are available for mobilization and form the input for our transport model. It is operationally defined as (a) plastic littered onto the terrestrial environment and (b) plastic directly disposed of into water bodies.
2. Nonleakage MPW: This category includes mismanaged pathways that, while environmentally harmful, remove plastic from the surface transport system. For the purpose of this model, it is defined as (a) unmanaged buried waste and (b) openly burned plastic waste.

This distinction is fundamental. This allows us to accurately quantify the true pool of plastic waste available to be mobilized by runoff, preventing the overestimation that would result from including nonavailable (buried or burned) waste in a hydrological transport model.

The analysis is conducted by combining the material flow analysis (MFA) principle with spatial data processing in a GIS environment. This method builds upon and develops approaches used in previous studies [1–6]. This methodological combination is essential for two key reasons:

1. To quantify "how much" (MFA): The MFA is the accounting framework used to track the mass balance of plastic from its point of generation through the entire waste management system. This allows us to quantify the total volume of waste that exits the formal collection and disposal system, creating the total "Mismanaged Plastic Waste" pool.
2. To pinpoint "Where" (GIS): A simple MFA provides a nonspatial number (e.g., "X tons of MPW for Regency Y"). This is insufficient because leakage risk is fundamentally spatial. By integrating the MFA data with GIS data, we can disaggregate this total MPW down to the subdistrict (kecamatan) level and assign it to specific locations on the basis of population density, land use, and proximity to transport pathways such as rivers.

In this study, data on waste generation for each district/city are incomplete and not always available annually, according to the SIPSN and related agency data. Therefore, the current study assumes that per capita waste generation per day remains constant from 2020–2023, but in this research, we also measure the data uncertainty specific to the data age and data sources. This considers that the annual waste generation in a city/district will be divided by the population data for the same year (e.g., generation in city A in 2022 will be divided by the population of city A in 2022); thus, the generation value changes relative to the population.

For unavailable data on waste management facilities, waste handling data from the SIPSN for each district are included. If that is also missing, data from the Riskesdas 2018 analysis (percentage of waste collected) will be used. On the basis of the data hierarchy and timeliness, the data selection priority is:

1. Data on waste management (from source, transport, recovery, and final processing).
2. Data on waste management achievements (handling and reduction) from the SIPSN.
3. Data from analysis via Riskesdas 2018 (the most complete data for handling at the source).

In ArcGIS, calculation and layering processes are performed to determine the MPW potential for each subdistrict in Indonesia. After the MPW data are analyzed for each region, this study displays an MPW potential index map at the subdistrict level. Currently, the available data in Indonesia are at the district/city level. To create an MPW map at the subdistrict level, this stage uses the following approach: a. Input various data for grid creation in ArcGIS, including (i) administrative boundary maps (districts and subdistricts) and (ii) population density maps. b. MPW per capita data (derived from district-level MFA data) are divided by the district's population. c. In addition to SIPSN data, data from previous research regarding waste generation and composition at the subdistrict level will be explored. d. Combining waste facility data and waste management characteristics in urban and rural areas on the basis of Riskesdas data (handling at source and facility conditions). e. Population density and per capita waste generation data are combined to derive the potential MPW for each subdistrict, allowing for the determination of high-potential areas via GIS.

The index consists of 5 classes: very high, high, moderate, low, and very low. The index range is determined after the MPW calculations are complete. This index is created via the quantile method available in ArcGIS. The quantile is used to divide the dataset into equal parts on the basis of specific variable values. In the GIS context, quantile classification is used to divide classes so that the total number of features (e.g., shapefiles, waste generation data) is approximately the same. This classification type is useful for showing rankings and ordinal data [7,8].

**The Rationale for Data Fusion**

A primary challenge in Indonesian waste modeling is that no single government agency provides a complete dataset. The data are fragmented, collected for different purposes, and have significant, well-known gaps (such as the informal sector).

Therefore, this research employs a data fusion approach, combining and cross-validating data from multiple sources to build a comprehensive model that overcomes the limitations of any single source.

1. Dukcapil Nasional (Directorate General of Population and Civil Registration): Waste generation is a direct function of the population. To move from the regency (kabupaten) level to the subdistrict (kecamatan) level, we need the most accurate, high-resolution, and current population data available. Dukcapil's semester-based registry data constitute the definitive population source, making it far more precise and timely than projections based on the 10-year census. These data are the core variables used to spatially disaggregate the total waste generated.

Role: Provides the primary demographic driver for the entire model.

1. Primary Sampling Data: This data is the "ground truth" data, collected directly from the field through rigorous, site-specific Waste Analysis and Characterization Studies (WACS). Unlike the other sources, which rely on reporting, estimation, or perception, primary sampling provides the most accurate, empirical measurement of actual waste generation rates, composition, and density.

Role: Serves as the primary benchmark for comparison and model validation. While too expensive and time-consuming to conduct nationwide, these studies (where available for specific cities or regions) are essential for:

1. Calibrating the model's baseline assumptions (e.g., validating the per-capita generation rates reported in SIPSN).
2. Assessing the accuracy of the plastic waste composition percentages used in the model.
3. Providing a quantitative basis for the uncertainty analysis by showing the real-world variance between "reported" data and "sampled" data.
4. SIPSN (Ministry of Environment - KLHK) & Local Environmental Agencies (DLH): These sources provide the top-down baseline for the formal waste system. The SIPSN contains official, self-reported data from regencies on total waste generation, formal collection rates, waste composition, and the amount of waste processed at formal facilities (TPA, TPS3R, etc.). Local DLH data can supplement or validate these figures at a more granular level.

Role: Defines the inputs (generation) and formal management pathways of the MFA.

1. RISKESDAS (Ministry of Health): These national socioeconomic and health surveys are the keys to understanding unmanaged pathways. SIPSN tells us what is collected, but it does not tell us what happens to the waste that is not. RISKESDAS and SUSENAS survey households directly about their behavior, providing critical data on the methods of unmanaged disposal (e.g., "What does your household do with its waste? ").

Role: Provides the behavioral data needed to split the total unmanaged waste into specific pathways: littered, dumped to water, burned, or buried. This directly fills the informal sector gap left by the SIPSN.

1. BPS (Statistics Indonesia) & BIG (Geospatial Information Agency): These agencies provide the spatial and demographic backbone of the model.

Role: The BPS provides population data at the subdistrict or village level, which is the primary proxy used to disaggregate waste generation. BIG provides essential GIS layers, such as administrative boundaries (kecamatan), river networks, coastlines, and land use maps.

A crucial component of this research methodology is the formal quantification of uncertainty. Given that the model relies on a fusion of data from multiple agencies—each with different collection purposes, methodologies, and limitations—it is essential to move beyond a single deterministic result. We therefore develop a data quality index (DQI) to formally assess and normalize the uncertainty associated with the primary data inputs. This DQI will be used to create final "confidence data" that accompany the Mismanaged Plastic Waste (MPW) results. This approach allows policymakers and stakeholders to see not only where the leakage hotspots are but also how reliable the data are for that specific area.

This data quality index is a normalized score. The score is a composite value based on several key criteria that define the "condition" of the data. These criteria include its timeliness (e.g., data from the last two years versus data older than five), its methodology (e.g., direct measurement from a weighbridge versus estimations based on population), its completeness (e.g., all required fields present versus significant gaps), and its spatial resolution (e.g., data native to the kecamatan level versus kabupaten-level data that must be disaggregated).

This DQI framework is applied to each data source differently. Population data from Dukcapil are generally of high quality, as they are timely, registry-based, and spatially explicit and would therefore receive a high DQI. In contrast, the data from the SIPSN and local DLH offices are the most variable; a regency that provides complete, recent data based on measured weighbridge inputs would receive a high DQI, whereas a regency that provides incomplete estimates would receive a very low DQI. Similarly, behavioral data from RISKESDAS or BPS are methodologically strong due to statistical sampling, but their score may be moderated if the data are only representative at the kabupaten level, thus introducing uncertainty when applied to a kecamatan.

1. **Scope**

This research encompasses a national-scale quantitative assessment of Mismanaged Plastic Waste (MPW) in Indonesia, with a final analytical resolution at the subdistrict (kecamatan) level. The focus of this study is thematically constrained to "Potential-Leakage MPW," which is operationally defined as plastic that is terrestrially lit or directly disposed of in water bodies. This method specifically excludes mismanaged pathways considered "nonleakage" (i.e., open burning and unmanaged burial) to accurately quantify the specific pool of waste available for hydrological transport. Methodologically, the scope involves a material flow analysis (MFA) combined with GIS spatial processing, built upon a "data fusion" approach. This approach integrates national demographic data (Dukcapil), formal waste system data (SIPSN, DLH), behavioral data (RISKESDAS), and geospatial framework data (BIG, BPS) for the 2020-2023 period. A core component of the scope is the formal quantification of uncertainty via a data quality index (DQI). The final deliverable is a high-resolution potential MPW index map for all subdistricts, which serves as the primary input for subsequent environmental transport modeling.

1. **Review of Data Resources**

Data collection in this study uses secondary data obtained from the National Waste Management Information System (SIPSN) website and related government agencies throughout Indonesia. The data used in this stage include data for calculating the material flow of waste from the source to final disposal. This encompasses data on waste generation (domestic and nondomestic), waste collection, waste reduction, waste transportation, and final processing at landfills (TPA) [9]. Additionally, population data (from Dukcapil Nasional) are used to determine the population and population density in each region. The various data required for this study are detailed in Table S.1.

**Table S.1.** List of Data Collected

| **Category** | **Parameter** | **Description and Data Source** |
| --- | --- | --- |
| Data and Regional Maps | Map of Indonesia | Geospatial Information Agency (BIG) |
| Land use |
| Indonesian Population Data | Population at the subdistrict level | Dukcapil Nasional (National Directorate General of Population and Civil Registration) |
| Rural and urban population | Dukcapil Nasional |
| Population projection in Indonesia | Statistics Indonesia (BPS) |
| Population density map | Dukcapil Nasional |
| Waste Generation Data | Waste generation (per capita and total) | SIPSN, IKPLHD (Regional Environmental Quality Index), Strategic Plans, and Related Agencies |
| Field Sampling |  |
| Waste composition (percentage of plastic) | SIPSN |
| Field Sampling |  |
| Data on Waste Handling at Source | Data on waste burned | Riskesdas (Basic Health Research) 2018 |
| Data on waste buried |
| Data on waste disposed indiscriminately |
| Data on waste disposed into rivers |
| Data on Waste Facilities at Source | Data on waste bin conditions (Lid availability, bin condition, etc.) | Riskesdas 2018 |
| Data on waste collection services | Population served by formal waste management | Riskesdas, SIPSN |
| Government/Agency Reports |  |
| Field Sampling |  |
| Amount of waste collected by informal sector | Local Government Data |
| Field Sampling |
| Data on self-managed waste by community | Riskesdas Data |
| Field Sampling |
| Data on temporary collection facilities (TPS/Transfer Station) | Number of TPS/TPS3R (Reduce, Reuse, Recycle Waste Management Site) | SIPSN |
| Capacity of TPS/TPS3R | Data from Ministry/Government/Related Agencies |
| Spatial distribution of TPS/TPS3R | Previous research data |
| Data on recycling and informal sector | Amount of waste reduced by TPS3R | 1. Ministry of Public Works and Housing (PUPR) 2. SIPSN and related agencies 3. Previous research and Field Sampling |
| Amount of waste reduced by Waste Banks |
| Amount of waste reduced by informal sector (scavengers, stalls, collectors) |
| Potential Leakage Data | Leakage data from each waste facility | Previous research and Literature |
| Landfill (TPA) Data | Sanitary Landfill | 1. Data from Ministry of PUPR 2. Data from SIPSN |
| Controlled Landfill |
| Open Dumping |

Waste management data is one of the most critical elements of this study, serving as the primary input for identifying waste sources with the potential for environmental leakage in each region. This data encompasses waste treatment, management, reduction, and final disposal processes. The data required for this research includes:

1. Data on waste generation, composition, and management at waste facilities.
2. Data on waste treatment and management at the source (both domestic and non-domestic).
3. **SIPSN**

SIPSN, which stands for Sistem Informasi Pengelolaan Sampah Nasional, is Indonesia's official National Waste Management Information System. It is a web-based platform managed by the Ministry of Environment and Forestry (KLHK) and established by Ministerial Regulation No. 6 of 2022. The primary purpose of the SIPSN is to create a single, centralized database by collecting, integrating, and publishing waste management data from all 514 regencies and cities across the country. This system is designed to track key metrics such as total waste generation, waste composition (e.g., plastic, food, paper), the amount of waste successfully reduced through 3R activities, and the amount of waste handled at formal facilities. Ultimately, the SIPSN serves as the government's primary tool for monitoring national progress toward policy goals, such as those in the National Waste Management Policy (Jakstranas), and for providing public access to waste data. The data available on this website includes:

- 1. Waste Sources: Data on the origin of waste (e.g., households, industry, and other non-domestic sources).

1. Waste Generation: Data on the total amount of waste generated (per day and per year).
2. Waste Composition: Data on the types of waste and their respective percentages (e.g., organic, plastic, paper, metal, other).
3. Waste Management Facilities: Data on facilities used to manage waste, such as TPST (Integrated Waste Treatment Facility), TPA (Landfill), TPS3R (3R Waste Management Facility), PDU (Recycling Center), Waste Banks, ITF (Intermediate Transfer Facility), and others.
4. Other Information: Other data related to waste management.

However, not all regencies/cities deliver this database. Since its inception in 2018, there has not been a single year with complete data for all regencies/cities. In 2022 and 2023, only approximately 309 regencies/cities submitted data on waste generation and management.

The main strengths of the SIPSN lie in its centralization and transparency. Before its implementation, waste data were fragmented, inconsistent, and difficult to compare, as each local government office (Dinas Lingkungan Hidup) used different reporting methods. SIPSN provides a standardized format, allowing for national-level aggregation and analysis. Furthermore, because the portal is publicly accessible, it fosters transparency and accountability, enabling researchers, NGOs, and the public to access official government statistics. These data are essential for the central government to monitor national performance and identify regions that are falling behind targets.

However, the SIPSN suffers from several significant weaknesses, with the most critical being the quality and reliability of its data. The system operates on a "waste in, waste out" principle, meaning that its accuracy is entirely dependent on the quality of the data self-reported by each local government. Many regional offices lack the budget, technical capacity, or equipment (such as weighbridges at landfills) to conduct accurate waste surveys, often relying on estimates. This leads to inconsistent and incomplete reporting, with data from many of the 514 regencies often missing, which creates significant gaps in the national statistics.

Furthermore, the system has structural blind spots that are particularly problematic for detailed research. SIPSN data collection is structured around formal, government-registered facilities (such as landfills and official waste banks) and largely fails to capture the massive contribution of Indonesia's informal waste sector. The critical work done by the middleman is also listed but has the potential to miss the unlisted middleman; this condition can be a problem for the data uncertainty for the calculation.

1. **RISKESDAS 2018**
2. **Understanding Riskesdas 2018: National Health Snapshot**

Riskesdas stands for *Riset Kesehatan Dasar*, which translates to Basic Health Research. It is a national-scale health survey conducted by the Health Research and Development Agency (Balitbangkes) of the Ministry of Health of the Republic of Indonesia. Its primary objective is to provide comprehensive data and information regarding the public's health status, disease risk factors, and access to healthcare services throughout Indonesia. The scale of the survey is massive, with data designed to be representative of the population not only at the national and provincial levels but also down to the district/city (*kabupaten/kota*) level. This makes the report critically important for local health development planning. This research is conducted periodically (e.g., 2007, 2013, 2018), allowing the government to monitor health trends and evaluate public health programs over time. The 2018 Riskesdas was particularly notable because it was integrated with the National Socioeconomic Survey (Susenas) from Statistics Indonesia (BPS), enabling richer analysis by linking health data directly with socioeconomic data [10].

1. **Methodology and Broad Scope**

The 2018 Riskesdas used a *cross-sectional* study design, capturing a snapshot of data at a single point in time. It surveyed hundreds of thousands of households, which is reflected in the large weighted sample size of 282,654 households. The data collected are far broader than just waste management; its main coverage includes the following:

- Nutritional status (e.g., stunting, child malnutrition)
- Communicable diseases (e.g., tuberculosis, diarrhea, malaria)
- Noncommunicable diseases (e.g., hypertension, diabetes, obesity, smoking)
- Maternal and Child Health (KIA)
- Access to and utilization of health services (e.g., national health insurance/JKN, immunization)

1. **The Household Waste Management Data**

In the context of waste management, Riskesdas 2018 provides crucial data on waste handling *at the source* (the household). It is critical to classify this as self-reported behavioral data, not perception data, as it captures what people *say they do*. The survey asks respondents to identify their *primary* disposal method, which is categorized as follows:

- Diangkut (Collected by a formal service)
- Dibakar (Burned)
- Ditanam (Buried)
- Dibuat kompos (Composted)
- Dibuang ke kali/selokan/laut (Dumped into rivers/drains/sea)
- Dibuang sembarangan (Dumped in an open space/illegally)

1. **Critical analysis: strengths and limitations of the data**

This dataset has immense value, but it must be used with a clear understanding of its strengths and limitations.

**Strengths**

- Statistical power: With a sample size of 282,654 households, its scale provides statistical power. This results in a very low confidence interval (often 1–5% at the municipal, provincial or national level), meaning that the estimates are highly precise.
- Cross-validation: These "bottom-up" household data can be used as powerful tools to crosscheck "top-down" official municipal data or figures from the National Waste Management Data System (SIPSN), which rely on reports from collection services and landfills.

**Limitations**

Despite its strengths, the data must be interpreted carefully owing to three primary limitations:

1. Social desirability bias: The data are entirely self-reported. A respondent may be embarrassed to admit to high-risk behavior, such as dumping waste directly into a river, which they know is socially "wrong" or polluting. Consequently, they might lie and claim a more "acceptable" practice, such as burning or burying, which skews the data.
2. Oversimplification ("Primary Method"): The survey forces respondents to choose only their *primary* method. This approach fails to capture the complex reality of mixed waste management, where a single household often uses multiple methods simultaneously (e.g., recycling valuables, composting organics, and burning plastics). The data flattens this complex behavior into a single, misleading category.
3. Lack of Causal Context (The "Why"): The most significant weakness is that the data provide no causal context; it tells us *what* households are doing but cannot explain *why*. The fact that households burn their waste is a critical finding, but it does not tell us if this is due to a service failure (unreliable/expensive collection), a cultural norm, a lack of risk perception (believing burning is "clean"), or an infrastructure barrier (living in a narrow alley). Without knowledge of "why," it is impossible to design an effective policy.

Nevertheless, despite these potential errors and biases, Riskesdas 2018 is the only comprehensive national dataset available at the regency/city level for household waste treatment. Meanwhile, data on waste treatment from non-domestic similar to Riskesdas sources is not yet available in Indonesia, therefore the data from SIPSN is used for non-domestic.

1. **Local Data**

The model's foundation was built upon national-level statistics from the SIPSN, but these data were systematically refined via a "bottom-up" triangulation approach. Beyond SIPSN, waste data is also available in the IKPLHD (Regional Environmental Quality Index) at provincial and regency/city levels, though not all IKPLHD reports are easily accessible via the websites of respective regional Environmental Agencies (DLH). Other potential sources include the Strategic Plans (Renstra) of related agencies and Regional Mid-Term Development Plans (RPJMD). However, the best data is typically found in the annually updated IKPLHD. These local data served two critical functions. First, it was used for gap filling where the SIPSN data were missing or outdated. Second, it enabled cross-validation to identify and correct discrepancies; for example, a Jakstrada policy document stating a measured collection rate of 45% was used to correct an aspirational 60% goal found in the national portal. This triangulation process proved essential for improving the accuracy of the formal collection rate and directly informed the model's data quality index (DQI).

1. **Sampling Data**

The final and most rigorous layer was the use of a new, primary "ground truth" dataset from a field sampling campaign conducted in 17 cities across Indonesia. This dataset was assumed to be the most accurate and was applied in two ways. First, for the 17 sampled cities, these primary data superseded all secondary sources. Our directly measured values were used for critical variables such as the plastic waste fraction per capita waste generation rates and household disposal behaviors; these cities served as high-confidence "anchor points" in the model. Second, and more powerfully, this dataset was employed for national-scale calibration. We also compared our field data to the SIPSN data for the same 17 cities to quantify systemic biases and create correction factors (e.g., "SIPSN was found to systematically overestimate collection by 15%"), which were then applied to similar regions nationwide to improve the accuracy of the entire model.

1. **Data Harmonization, Correction and Quality Assurance**

To formally quantify the uncertainty in the plastic waste material flow analysis (MFA), a Monte Carlo simulation (MCS) with 10,000 iterations was employed. This methodology involves constructing a multilayer uncertainty framework by first deconstructing uncertainty into its fundamental components. A core feature of this approach is the separation of uncertainty into two distinct types: systematic (global) uncertainty and local (municipal) uncertainty. Systematic uncertainty accounts for a single, shared bias applied to all 514 municipalities simultaneously in each run (e.g., a systemic flaw in national data collection standards), whereas local uncertainty applies an independent random factor to each municipality to account for local errors and natural variability (e.g., a local data entry error or unique regional habits). All uncertain inputs were modeled via lognormal distributions to ensure that all the sampled values, such as waste generation, remained nonnegative.

Data from primary sampling is the most accurate compared to data derived from estimates or per capita waste generation multipliers. However, the data used to populate SIPSN or other waste data documents predominantly relies on assumptions or multipliers. This is because primary sampling requires significantly more funding than other data analysis methods, leading to a higher potential for bias or error compared to primary data. Previous state that obtaining accurate field data on waste statistics—including quantity, composition, characteristics, and recycling potential—is recognized by many experts as a major challenge in developing countries [11],. Nevertheless, the only comprehensive source for waste data in Indonesia at present is SIPSN.

Data on waste generation is a primary dataset in this study, but other data is crucial for understanding waste treatment and management from its source to final processing at a TPA or TPST. The data in SIPSN also covers both formal and informal waste facilities, including TPS3R, waste banks, PDU, composting, Waste-to-Energy (WTE) facilities, TPST, and TPA. However, some of this data is not updated annually and is sometimes duplicated from the previous year.

Furthermore, based on analysis and observation of the data from 2018 to 2023, several anomalous values were identified for waste generation or the volume of waste managed at facilities. For example, some facilities report waste intake volumes that are significantly larger than their processing capacity, or the total waste entering TPSTs/TPAs exceeds the total waste generation for that entire regency/city. This is a critical issue to address in Material Flow Analysis (MFA). Normalization and data cleaning are required to obtain more accurate and reasonable data.

The input parameters were characterized by combining baseline data with these uncertainty factors. Both the baseline waste generation and the waste management fractions (e.g., collected, open burning, river disposal) were assigned a systematic (global) CV of 0.10 (10%). This represented moderate, system-wide bias from the use of national-level standards (SNI) and perception-based national surveys (RISKESDAS). For local (municipal) uncertainty, the waste management fractions were assigned a CV of 0.20 (20%). This higher value was justified because the underlying RISKESDAS data are old, perception-based, and not locally specific, thus carrying high uncertainty when applied at the municipal level. In contrast, the local CV for waste generation was variable and tied directly to a data quality index (DQI). This CV ranged from 0.10 (10%) for the highest-quality data (e.g., primary field sampling) to 0.50 (50%) for the lowest-quality data (e.g., imputed data from very old sources). In every iteration, the resulting waste management fractions were normalized to ensure that they summed to 100%, thus maintaining mass balance.

**Table S2.** Uncertainty number of the model

| **Parameter** | **Uncertainty Type** | **CV** | **Justification** |
| --- | --- | --- | --- |
| Waste Generation | Systematic (Global) | 0.10 (10%) | Models a moderate, system-wide bias in all generation data. This accounts for potential shared flaws in the national standards for waste sampling or their inconsistent application across the country. |
| Waste Management Fractions  *(Collected, Burned, Direct Disposal, etc.)* | Systematic (Global) | 0.10 (10%) | Models a moderate, system-wide bias in the behavioral data. This is directly linked to using a single national survey (like RISKESDAS) and SIPSN. Any flaw in the survey's "perception-based" questions would be shared by all 514 regions. |
| Waste Management Fractions | Local (Municipal) | 0.20 (20%) | This reflects the high local uncertainty of using old, national, perception-based data. Even if the RISKESDAS national average has a 95% CI, applying it to a *specific* regency in the *current* year is highly uncertain. This 20% CV is a justified "penalty" for data that is (a) old, (b) perception-based, and (c) not locally specific. |
| Waste Generation | Local (Municipal) | Variable | This is the Data Quality Index (DQI) in action. The local uncertainty in waste generation is *not* one-size-fits-all; it is tied directly to the *source* of the data for that specific municipality. |
| *DQI 5 (Best* | *0.10 (10%)* | Best Quality: Represents the 17-city primary field sampling. This "gold standard" data is based on direct measurement, so it is assigned the lowest uncertainty. |
| *DQI 4 (High)* | *0.20 (20%)* | High Quality: Represents recent (e.g., 2022) SIPSN data, likely cross-validated with local DLH reports as part "Local-Level Triangulation." |
| *DQI 3 (Medium)* | *0.30 (30%)* | Medium Quality: Represents older SIPSN data (e.g., 2021). Confidence decreases as the data ages and no longer reflects the most current conditions. |
| *DQI 2 (Low)* | *0.40 (40%)* | Low Quality: Represents very old SIPSN data (e.g., 2019-2020). This data is considered unreliable as it predates major economic/social shifts. |
| *DQI 1 (Worst)* | *0.50 (50%)* | Worst Quality: Represents missing data that had to be "imputed" (i.e., estimated based on neighbors or old values). It is assigned the highest uncertainty. |

This simulation process generated a full probability distribution for all key outputs. The final results were reported not as single point estimates but as a median (50th percentile) value accompanied by a 95% confidence interval (CI), which captures the full range of plausible outcomes. Finally, a global sensitivity analysis (GSA) was performed on the results to apportion the

**References**

1. Cottom, J. W., Cook, E. & Velis, C. A. A local-to-global emissions inventory of macroplastic pollution. *Nature* **633**, 101–108 (2024).

2. Chen, Q. & Fei, X. Effective reduction of land-to-ocean plastic leakage in Thailand from 2000 to 2019 and implications for low- and middle-income countries. *Resources, Conservation and Recycling* **198**, 107204 (2023).

3. Jambeck, J. R. *et al.* Plastic waste inputs from land into the ocean. *Science* **347**, 768–771 (2015).

4. Lebreton, L. C. M. *et al.* River plastic emissions to the world’s oceans. *Nature Communications* **8**, (2017).

5. Meijer, L. J. J., Emmerik, T. van, Ent, R. van der, Schmidt, C. & Lebreton, L. More than 1000 rivers account for 80% of global riverine plastic emissions into the ocean. *Science Advances* **7**, (2021).

6. World Bank. *Plastic Waste Discharges From Rivers and Coatlines in Indonesia*. (Washington DC, 2021).

7. Liu, Y., Akashi, F. & Taniguchi, M. Quantile Method for Time Series. in *Empirical Likelihood and Quantile Methods for Time Series: Efficiency, Robustness, Optimality, and Prediction* (eds Liu, Y., Akashi, F. & Taniguchi, M.) 59–86 (Springer, Singapore, 2018). doi:10.1007/978-981-10-0152-9_3.

8. Smith, M. J. D., Goodchild, M. F. & Longley, P. A. *Geospatial Analysis: A Comprehensive Guide to Principles, Techniques and Software Tools*. (Winchelsea Press, 2018).

9. KLHK. SIPSN - Sistem Informasi Pengelolaan Sampah Nasional. https://sipsn.menlhk.go.id/sipsn/public/data/timbulan.

10. Kemenkes RI. Riset Kesehatan Dasar (Riskesdas) (2018). (2018).

11. Guerrero, L. A., Maas, G. & Hogland, W. Solid waste management challenges for cities in developing countries. *Waste Management* **33**, 220–232 (2013).
